# Supplementary material for: Biochemical Reduction of the Topology of the Diverse WDR76 Protein Interactome
Source: bioRxiv preprint, doi:10.1101/650028, version 1 (2019-05-24)
Supplement: Supplementarl Table 3 [file 650028_file05.xlsx]

## Sheet: A
Supplemental Table 3. Proteins identified in affinity purification couple with size exclusion mass spectrometry of WDR76
			Column ends with:
			_P	Peptide Count
			_dS	Distributed Spectral Count
			_SC	Sequence Coverage (%)
			_dNSAF	Distributed Normalized Spectral Abundance Factor
dNSAF_Rank	TMHMM_Topology	SIGNALP_NN_YMAX_POS	SIGNALP_NN_DSCORE	SIGNALP_HMM_TYPE	SIGNALP_HMM_POS	NCBI_Gene	NCBI_Locus_Tag	NCBI_Chromosome	NCBI_EC_Number	Region_Sources	NCBI_Region_Names	NCBI_Region_Notes	NCBI_Site_Sources	NCBI_Site_Types	NCBI_Site_Notes	NCBI_Go_Components	NCBI_Go_Functions	NCBI_Go_Processes	Total Proteins In Group	Proteins In Group	Contrast_Rank	Locus	Description	Hs_WDR76_A6-Mp1Smn7y2as_Ti_dNSAF	Hs_WDR76_A8-Mp1Smn7y2as_Ti_dNSAF	Hs_WDR76_A10-Mp1Smn7y2as_Ti_dNSAF	Hs_WDR76_A12-Mp1Smn7y2as_Ti_dNSAF	Hs_WDR76_B1-Mp1Smn7y2as_Ti_dNSAF	Hs_WDR76_B2-Mp1Smn7y2as_Ti_dNSAF	Hs_WDR76_B3-Mp1Smn7y2as_Ti_dNSAF	Hs_WDR76_B4-Mp1Smn7y2as_Ti_dNSAF	Hs_WDR76_B5-Mp1Smn7y2as_Ti_dNSAF	Hs_WDR76_B6-Mp1Smn7y2as_Ti_dNSAF	Hs_WDR76_B7-Mp1Smn7y2as_Ti_dNSAF	Hs_WDR76_B8-Mp1Smn7y2as_Ti_dNSAF	Hs_WDR76_B9-Mp1Smn7y2as_Ti_dNSAF	Hs_WDR76_B10-Mp1Smn7y2as_Ti_dNSAF	Hs_WDR76_B11-Mp1Smn7y2as_Ti_dNSAF	Hs_WDR76_B12-Mp1Smn7y2as_Ti_dNSAF	Hs_WDR76_C1-Mp1Smn7y2as_Ti_dNSAF	Hs_WDR76_C2-Mp1Smn7y2as_Ti_dNSAF	Hs_WDR76_C3-Mp1Smn7y2as_Ti_dNSAF	Hs_WDR76_C4-Mp1Smn7y2as_Ti_dNSAF	Hs_WDR76_C5-Mp1Smn7y2as_Ti_dNSAF	Hs_WDR76_C6-Mp1Smn7y2as_Ti_dNSAF	Hs_WDR76_C7-Mp1Smn7y2as_Ti_dNSAF	Hs_WDR76_C8-Mp1Smn7y2as_Ti_dNSAF	Hs_WDR76_C9-Mp1Smn7y2as_Ti_dNSAF	Hs_WDR76_C10-Mp1Smn7y2as_Ti_dNSAF
1	o	24	0.254	Q	40	SCO2		22		[101..242]	[SCO]	[SCO (an acronym for Synthesis of Cytochrome c Oxidase) family; composed of proteins similar to Sco1, a membrane-anchored protein possessing a soluble domain with a TRX fold. Members of this family are required for the proper assembly of cytochrome c...; cd02968]	[order(133,137,224)]	[other]	[Cu(I) binding site [ion binding]]				1	NP_005129.2	3	NP_005129.2	protein SCO2 homolog, mitochondrial precursor [Homo sapiens]	0	0	0	0	0	0	0	0	0	0	0	0	0	0	0	0	0	0	0	0	0	0	0.00011569	0	0	0
2	o	24	0.212	S	22	HSDL2		9		[5..201][8..175][245..338]	[PRK08278][NADB_Rossmann][SCP2]	[short chain dehydrogenase; Provisional][Rossmann-fold NAD(P)(+)-binding proteins; cl21454][SCP-2 sterol transfer family; pfam02036]	[order(17,19..20,22,41..43,95,99,124..127)][order(95,99)]	[other][active]	[NAD(P) binding site [chemical binding]][]				2	NP_001182751.1;NP_115679.2	7	NP_001182751.1	0 genes:. 2 proteins in this group did not match any genes. NP_001182751.1:hydroxysteroid dehydrogenase-like protein 2 isoform 2 [Homo sapiens] ;NP_115679.2:hydroxysteroid dehydrogenase-like protein 2 isoform 1 [Homo sapiens] ;	0	0	0	0	0	0	0	0.00093484	0	0	0	0	0	0	0	0	0	0	0	0	0	0	0	0	0	0
3	o377-399i419-441o855-877i931-950o970-989i1002-1024o1039-1061i	3	0.049	Q	0	ATP2B1		12	3.6.3.8	[15..1064][51..121][170..465][525..611][<681..806][880..1058][1100..1117][1103..1155][1118..1127]	[ATPase-IIB_Ca][Cation_ATPase_N][E1-E2_ATPase][Hydrolase_like2][HAD][Cation_ATPase_C][Calmodulin-binding subdomain A. {ECO:0000305|PubMed:1332771}][ATP_Ca_trans_C][Calmodulin-binding subdomain B. {ECO:0000305|PubMed:1332771}]	[plasma-membrane calcium-translocating P-type ATPase; TIGR01517][Cation transporter/ATPase, N-terminus; pfam00690][E1-E2 ATPase; pfam00122][Putative hydrolase of sodium-potassium ATPase alpha subunit; pfam13246][haloacid dehalogenase-like hydrolase; pfam12710][Cation transporting ATPase, C-terminus; pfam00689][propagated from UniProtKB/Swiss-Prot (P20020.3)][Plasma membrane calcium transporter AT…	[2][8][17][98..118][155..175][338][367..386][420..437][708][853..872][883..903][924..946][965..986][1006..1027][1038..1059][1116][1129]	[acetylation][phosphorylation][phosphorylation][transmembrane region][transmembrane region][phosphorylation][transmembrane region][transmembrane region][other][transmembrane region][transmembrane region][transmembrane region][transmembrane region][transmembrane region][transmembrane region][phosphorylation][phosphorylation]	[N-acetylglycine. {ECO:0000244|PubMed:20068231}; propagated from UniProtKB/Swiss-Prot (P20020.3)][Phosphoserine. {ECO:0000250|UniProtKB:Q64568}; propagated from UniProtKB/Swiss-Prot (P20020.3)][Phosphoserine. {ECO:0000244|PubMed:18669648}; propagated from UniProtKB/Swiss-Prot (P20020.3)][propagated from UniProtKB/Swiss-Prot (P20020.3)][propagated from UniProtKB/Swiss-Prot (P20020.3)][Phosphoserin…				8	NP_001001323.1;NP_001001331.1;NP_001001344.1;NP_001001396.1;NP_001673.2;NP_001674.2;NP_001675.3;NP_068768.2	9	NP_001001323.1	0 genes:. 8 proteins in this group did not match any genes. NP_001001323.1:plasma membrane calcium-transporting ATPase 1 isoform 1a [Homo sapiens] ;NP_001001331.1:plasma membrane calcium-transporting ATPase 2 isoform 1 [Homo sapiens] ;NP_001001344.1:plasma membrane calcium-transporting ATPase 3 isoform 3b [Homo sapiens] ;NP_001001396.1:plasma membrane calcium-transporting ATPase 4 isoform 4a [Hom…	0	0	0	0	0	0.00018635	0	0.00013713	0	0	0	0	0	0	0	0	0	0	0	0	0	0	0	0	0	0
4						ARPIN		15		[<1..128]	[UPF0552]	[Uncharacterized protein family UPF0552; pfam10574]							2	NP_001269309.1;NP_872422.1	10	NP_001269309.1	0 genes:. 2 proteins in this group did not match any genes. NP_001269309.1:arpin isoform 2 [Homo sapiens] ;NP_872422.1:arpin isoform 1 [Homo sapiens] ;	0	0	0	0	0	0	0	0	0	0	0	0	0	0	0	0	0	0	0	0	0.00185931	0.00087973	0	0	0	0
5	o	28	0.481	S	28	HSD17B10		X	1.1.1.35;1.1.1.178;1.1.1.51	[7..251][9..252]	[fabG][HSD10-like_SDR_c]	[3-ketoacyl-(acyl-carrier-protein) reductase; Validated; PRK05557][17hydroxysteroid dehydrogenase type 10 (HSD10)-like, classical (c) SDRs; cd05371]	[order(17,20..22,41..42,63..65,91..93,120,153..155,168,172,][order(99..101,103,108..109,111,114..115,118,122..123,][order(99..101,108..109,111,114,118,123,126..127,130,][order(121,155,168,172)]	[other][other][other][active]	[NAD binding site [chemical binding]][homotetramer interface [polypeptide binding]][homodimer interface [polypeptide binding]][]				2	NP_001032900.1;NP_004484.1	11	NP_001032900.1	0 genes:. 2 proteins in this group did not match any genes. NP_001032900.1:3-hydroxyacyl-CoA dehydrogenase type-2 isoform 2 [Homo sapiens] ;NP_004484.1:3-hydroxyacyl-CoA dehydrogenase type-2 isoform 1 [Homo sapiens] ;	0	0	0	0	0	0.00173929	0	0.00255967	0	0.00087364	0	0.00083416	0	0	0	0	0	0	0	0.00369528	0	0	0	0	0	0
6						PCDH15		10		[156..245][286..394][404..510][518..614][626..718][727..820][828..926][935..1032][1050..1145][1154..1248]	[Cadherin_repeat][Cadherin_repeat][Cadherin_repeat][Cadherin_repeat][Cadherin_repeat][Cadherin_repeat][Cadherin_repeat][Cadherin_repeat][Cadherin_repeat][Cadherin_repeat]	[Cadherin tandem repeat domain; cd11304][Cadherin tandem repeat domain; cd11304][Cadherin tandem repeat domain; cd11304][Cadherin tandem repeat domain; cd11304][Cadherin tandem repeat domain; cd11304][Cadherin tandem repeat domain; cd11304][Cadherin tandem repeat domain; cd11304][Cadherin tandem repeat domain; cd11304][Cadherin tandem repeat domain; cd11304][Cadherin tandem repeat domain; cd11304]	[order(163..164,226,228)][order(293..294,359,361,392,394)][order(411..412,475,477,506,508..509)][order(525..526,577,579,612,614)][order(632..633,682,684,714,716..717)][order(734..735,783,785,816,818..819)][order(835..836,886,888,923,925..926)][order(942..943,1000,1002)][order(1052..1053,1101,1103,1141,1143..1144)][order(1160..1161,1216,1218)][1382..1402]	[other][other][other][other][other][other][other][other][other][other][transmembrane region]	[Ca2+ binding site [ion binding]][Ca2+ binding site [ion binding]][Ca2+ binding site [ion binding]][Ca2+ binding site [ion binding]][Ca2+ binding site [ion binding]][Ca2+ binding site [ion binding]][Ca2+ binding site [ion binding]][Ca2+ binding site [ion binding]][Ca2+ binding site [ion binding]][Ca2+ binding site [ion binding]][propagated from UniProtKB/Swiss-Prot (Q96QU1.2)]				10	NP_001136235.1;NP_001136236.1;NP_001136237.1;NP_001136238.1;NP_001136239.1;NP_001136241.1;NP_001136242.1;NP_001136243.1;NP_001136244.1;NP_149045.3	12	NP_001136235.1	0 genes:. 10 proteins in this group did not match any genes. NP_001136235.1:protocadherin-15 isoform CD1-1 precursor [Homo sapiens] ;NP_001136236.1:protocadherin-15 isoform CD1-2 precursor [Homo sapiens] ;NP_001136237.1:protocadherin-15 isoform CD1-6 precursor [Homo sapiens] ;NP_001136238.1:protocadherin-15 isoform CD1-7 precursor [Homo sapiens] ;NP_001136239.1:protocadherin-15 isoform CD1-8 prec…	0	0	0	0	0	0	0	0	0	0	0	0	0	0	0	0	0	0	0	0	0	0	1.569e-05	0	0	0
7	o	9	0.11	Q	21	LASP1		17		[5..57][61..95][67..95][97..131][98..128][203..261]	[LIM_LASP][Nebulin 1][Nebulin][Nebulin 2][NEBU][SH3_Lasp1_C]	[The LIM domain of LIM and SH3 Protein (LASP); cd09447][propagated from UniProtKB/Swiss-Prot (Q14847.2)][Nebulin repeat; pfam00880][propagated from UniProtKB/Swiss-Prot (Q14847.2)][The Nebulin repeat is present also in Las1; smart00227][C-terminal Src Homology 3 domain of LIM and SH3 domain protein 1; cd11934]	[1][order(5,8,26,29,32,35,53,56)][42][61][68][68][99][104][104][118][146][146][146][146][171][order(211,213,216,220,238..239,254,256..257)]	[acetylation][other][acetylation][phosphorylation][phosphorylation][phosphorylation][phosphorylation][phosphorylation][phosphorylation][phosphorylation][phosphorylation][phosphorylation][phosphorylation][phosphorylation][phosphorylation][other]	[N-acetylmethionine; propagated from UniProtKB/Swiss-Prot (Q14847.2)][Zn binding site [ion binding]][N6-acetyllysine; propagated from UniProtKB/Swiss-Prot (Q14847.2)][][][Phosphothreonine; propagated from UniProtKB/Swiss-Prot (Q14847.2)][][][Phosphothreonine; propagated from UniProtKB/Swiss-Prot (Q14847.2)][Phosphoserine; propagated from UniProtKB/Swiss-Prot (Q14847.2)][][][][Phosphoserine; propa…				1	NP_006139.1	15	NP_006139.1	LIM and SH3 domain protein 1 isoform a [Homo sapiens]	0	0	0	0	0	0	0	0	0	0	0	0	0	0	0	0	0	0	0	0.00451929	0.00277828	0.00131455	0.00023582	0	0	0
8	o	24	0.094	Q	24	SBDS		7		[9..241][13..103][106..227]	[Sdo1][SBDS][SBDS_C]	[Ribosome maturation protein Sdo1 [Translation, ribosomal structure and biogenesis]; COG1500][Shwachman-Bodian-Diamond syndrome (SBDS) protein; pfam01172][SBDS protein C-terminal domain; pfam09377]	[2]	[acetylation]	[N-acetylserine. {ECO:0000244|PubMed:22223895, ECO:0000244|PubMed:22814378, ECO:0000269|Ref.6}; propagated from UniProtKB/Swiss-Prot (Q9Y3A5.4)]				1	NP_057122.2	16	NP_057122.2	ribosome maturation protein SBDS [Homo sapiens]	0	0	0	0	0	0	0	0	0	0	0	0	0	0	0	0	0	0	0	0	0	0.00045746	0	0	0	0
10						OGDH		7	1.2.4.2	[49..1011][260..523][645..862]	[sucA][TPP_E1_OGDC_like][Transket_pyr]	[2-oxoglutarate dehydrogenase E1 component; Reviewed; PRK09404][Thiamine pyrophosphate (TPP) family, E1 of OGDC-like subfamily, TPP-binding module; composed of proteins similar to the E1 component of the 2-oxoglutarate dehydrogenase multienzyme complex (OGDC). OGDC catalyzes the oxidative decarboxylation of...; cd02016][Transketolase, pyrimidine binding domain; pfam02779]	[order(373,406..409,440,442)]	[other]	[TPP-binding site [chemical binding]]				2	NP_001158508.1;NP_002532.2	19	NP_001158508.1	0 genes:. 2 proteins in this group did not match any genes. NP_001158508.1:2-oxoglutarate dehydrogenase, mitochondrial isoform 3 precursor [Homo sapiens] ;NP_002532.2:2-oxoglutarate dehydrogenase, mitochondrial isoform 1 precursor [Homo sapiens] ;	0	0	0	0	0	0.00021506	0	0.00079126	0	0	0	0	0	0	0	0	0	0	0	0	0	0	0	0	0	0
11	i209-231o253-275i296-318o322-344i414-436o451-470i482-504o554-576i	22	0.069	Q	35	LBR		1		[9..56][205..615]	[TUDOR][PEMT]	[Tudor domains are found in many eukaryotic organisms and have been implicated in protein-protein interactions in which methylated protein substrates bind to these domains. For example, the Tudor domain of Survival of Motor Neuron (SMN) binds to...; cd04508][Phospholipid methyltransferase; cl21511]	[order(16,21,23,43,45)][55][71][86][97][99][99][101][118][212..232][258..278][299..319][326..346][386..406][447..467][481..501][561..581][594][601]	[other][acetylation][phosphorylation][phosphorylation][phosphorylation][phosphorylation][phosphorylation][phosphorylation][phosphorylation][transmembrane region][transmembrane region][transmembrane region][transmembrane region][transmembrane region][transmembrane region][transmembrane region][transmembrane region][acetylation][acetylation]	[dimethylated arginine/lysine binding site [chemical binding]][N6-acetyllysine; propagated from UniProtKB/Swiss-Prot (Q14739.2)][Phosphoserine, by CDK1; propagated from UniProtKB/Swiss-Prot (Q14739.2)][Phosphoserine, by CDK1; propagated from UniProtKB/Swiss-Prot (Q14739.2)][Phosphoserine; propagated from UniProtKB/Swiss-Prot (Q14739.2)][][Phosphoserine; propagated from UniProtKB/Swiss-Prot (Q1473…				1	NP_919424.1	21	NP_919424.1	lamin-B receptor [Homo sapiens]	0	0	0	0	0	0	0	0	0	0	0	0	0	0	0	0	0	0	0	0	0	0.0004649	0.00035028	0	0	0
12	o	20	0.073	Q	20	CTTN		11		[80..116][83..119][117..153][120..156][154..190][157..193][191..227][194..230][228..264][231..265][265..301][268..304][302..324][305..>325][<345..398][496..548]	[Cortactin 1][HS1_rep][Cortactin 2][HS1_rep][Cortactin 3][HS1_rep][Cortactin 4][HS1_rep][Cortactin 5][HS1_rep][Cortactin 6][HS1_rep][Cortactin 7, truncated][HS1_rep][DUF1682][SH3_Cortactin]	[propagated from UniProtKB/Swiss-Prot (Q14247.2)][Repeat in HS1/Cortactin; pfam02218][propagated from UniProtKB/Swiss-Prot (Q14247.2)][Repeat in HS1/Cortactin; pfam02218][propagated from UniProtKB/Swiss-Prot (Q14247.2)][Repeat in HS1/Cortactin; pfam02218][propagated from UniProtKB/Swiss-Prot (Q14247.2)][Repeat in HS1/Cortactin; pfam02218][propagated from UniProtKB/Swiss-Prot (Q14247.2)][Repeat in…	[11][24][87][135][141][150][172][182][198][209][235][272][282][304][309][334][345][348][399][399][401][401][401][405][405][405][411][411][417][417][418][418][418][421][421][421][426][446][446][453][453][470][486][486][489][order(501,503,506,509..510,528..529,540,542,544..545)]	[phosphorylation][phosphorylation][acetylation][phosphorylation][phosphorylation][phosphorylation][phosphorylation][phosphorylation][acetylation][phosphorylation][acetylation][acetylation][phosphorylation][acetylation][acetylation][phosphorylation][phosphorylation][phosphorylation][phosphorylation][phosphorylation][phosphorylation][phosphorylation][phosphorylation][phosphorylation][phosphorylatio…	[][][N6-acetyllysine; propagated from UniProtKB/Swiss-Prot (Q14247.2)][][][][][][N6-acetyllysine; propagated from UniProtKB/Swiss-Prot (Q14247.2)][][N6-acetyllysine; propagated from UniProtKB/Swiss-Prot (Q14247.2)][N6-acetyllysine; propagated from UniProtKB/Swiss-Prot (Q14247.2)][][N6-acetyllysine; propagated from UniProtKB/Swiss-Prot (Q14247.2)][N6-acetyllysine; propagated from UniProtKB/Swiss-P…				1	NP_005222.2	23	NP_005222.2	src substrate cortactin isoform a [Homo sapiens]	0	0	0	0	0	0	0	0	0	0	0	0	0	0	0	0.00381536	0	0	0	0.00079012	0	0.00083175	0.00022382	0	0	0
13	o	13	0.059	Q	15	RPS5		19		[18..204]	[uS7_Eukaryote]	[Eukaryota homolog of Ribosomal Protein S7; cd14867]	[1][2][order(18,47..49,51..54,87,91)][47][order(51,53,57..60,63,71,74,76..80,84..88,91,131..133,135,][order(95,98..99,102,168,170..171)][order(130,133,135,204)]	[acetylation][acetylation][other][acetylation][other][other][other]	[N-acetylmethionine, in 40S ribosomal protein S5, alternate; propagated from UniProtKB/Swiss-Prot (P46782.4)][N-acetylthreonine, in 40S ribosomal protein S5, N-terminally processed; propagated from UniProtKB/Swiss-Prot (P46782.4)][S9 interface [polypeptide binding]][N6-acetyllysine; propagated from UniProtKB/Swiss-Prot (P46782.4)][rRNA binding site [nucleotide binding]][S25 interface [polypeptide…				1	NP_001000.2	25	NP_001000.2	40S ribosomal protein S5 [Homo sapiens]	0	0	0	0	0	0	0	0.00158097	0	0	0	0.00515219	0	0	0	0	0	0	0	0	0	0	0	0	0	0
14	o	56	0.033	Q	0	SNRPA		19		[7..95][11..84][203..282][210..269]	[RRM1_U1A][RRM][RRM2_U1A][RRM]	[RNA recognition motif 1 found in vertebrate U1 small nuclear ribonucleoprotein A (U1A); cd12477][RNA recognition motif; smart00360][RNA recognition motif 2 found in vertebrate U1 small nuclear ribonucleoprotein A (U1 snRNP A or U1-A or U1A); cd12480][RNA recognition motif; smart00360]	[2][order(13,15..16,19,44,46,48..54,56,80,83,85..92)][60][131]	[acetylation][other][acetylation][phosphorylation]	[N-acetylalanine; propagated from UniProtKB/Swiss-Prot (P09012.3)][RNA binding site [nucleotide binding]][N6-acetyllysine; propagated from UniProtKB/Swiss-Prot (P09012.3)][Phosphothreonine; propagated from UniProtKB/Swiss-Prot (P09012.3)]				1	NP_004587.1	26	NP_004587.1	U1 small nuclear ribonucleoprotein A [Homo sapiens]	0	0	0	0	0	0	0	0	0	0	0	0	0	0	0	0	0	0	0	0.00374245	0.00171426	0.0008111	0.00021826	0	0	0
15						NVL		1		[193..761][206..342][517..657]	[SpoVK][AAA][AAA]	[AAA+-type ATPase, SpoVK/Ycf46/Vps4 family [Cell wall/membrane/envelope biogenesis, Cell cycle control, cell division, chromosome partitioning, Signal transduction mechanisms]; COG0464][The AAA+ (ATPases Associated with a wide variety of cellular Activities) superfamily represents an ancient group of ATPases belonging to the ASCE (for additional strand, catalytic E) division of the P-loop NTPase …	[214..221][order(215..222,273,320)][269..274][334][531..538][order(532..539,590,634)][586..591][648]	[other][other][other][other][other][other][other][other]	[Walker A motif][ATP binding site [chemical binding]][Walker B motif][arginine finger][Walker A motif][ATP binding site [chemical binding]][Walker B motif][arginine finger]				2	NP_001230076.1;NP_002524.2	27	NP_001230076.1	0 genes:. 2 proteins in this group did not match any genes. NP_001230076.1:nuclear valosin-containing protein-like isoform 4 [Homo sapiens] ;NP_002524.2:nuclear valosin-containing protein-like isoform 1 [Homo sapiens] ;	0	0	0	0	0	0	0	0	0	0	0	0	0	0	0	0	0	0	0	0	0	0.00022425	0	0	0	0
16						GPALPP1		13		[73..210]	[DUF3752]	[Protein of unknown function (DUF3752); pfam12572]							2	NP_001303881.1;NP_061029.2	29	NP_001303881.1	0 genes:. 2 proteins in this group did not match any genes. NP_001303881.1:GPALPP motifs-containing protein 1 isoform b [Homo sapiens] ;NP_061029.2:GPALPP motifs-containing protein 1 isoform a [Homo sapiens] ;	0	0	0	0	0	0	0	0	0	0	0	0	0	0	0	0	0	0	0	0	0	0	0.00014182	0	0	0
17						C2orf49		2		[12..190]	[Ashwin]	[Developmental protein; pfam15323]							2	NP_001273466.1;NP_076998.1	30	NP_001273466.1	0 genes:. 2 proteins in this group did not match any genes. NP_001273466.1:ashwin isoform 2 [Homo sapiens] ;NP_076998.1:ashwin isoform 1 [Homo sapiens] ;	0	0	0	0	0	0	0	0	0	0	0	0	0	0	0	0	0	0	0	0	0	0	0.00016197	0	0	0
18	o	17	0.064	Q	17	BRPF1		3		[15..>52][59..222][105..255][267..328][330..450][632..735][1089..1204]	[CactinC_cactus][Interaction with KAT6A and KAT6B][EPL1][PHD_BRPF1][ePHD_BRPF1][Bromo_brd1_like][BR140_related]	[Cactus-binding C-terminus of cactin protein; cl10717][propagated from UniProtKB/Swiss-Prot (P55201.2)][Enhancer of polycomb-like; pfam10513][PHD finger found in bromodomain and PHD finger-containing protein 1 (BRPF1) and similar proteins; cd15676][Extended PHD finger found in bromodomain and PHD finger-containing protein 1 (BRPF1) and similar proteins; cd15701][Bromodomain; brd1_like subfamily. …	[120][238][238][order(275,289..293,297,315)][order(276,279,293,296,301,304,317,320)][order(330,333,350,353,386,389,400,405,410,413,444,447)][order(385,396..400,406,442)][435][460][460][462][462][order(657,662,671,710,714,720)][866][928][1082][order(1099,1102,1105,1153,1157,1159)][1193]	[phosphorylation][phosphorylation][phosphorylation][other][other][other][other][phosphorylation][phosphorylation][phosphorylation][phosphorylation][phosphorylation][other][phosphorylation][phosphorylation][phosphorylation][other][phosphorylation]	[Phosphoserine. {ECO:0000244|PubMed:18669648}; propagated from UniProtKB/Swiss-Prot (P55201.2)][][Phosphoserine. {ECO:0000244|PubMed:24275569}; propagated from UniProtKB/Swiss-Prot (P55201.2)][putative histone H3 binding site [polypeptide binding]][Zn binding site [ion binding]][Zn binding site [ion binding]][putative histone H3 binding site [polypeptide binding]][][][Phosphoserine. {ECO:0000244|…				4	NP_001003694.1;NP_001305978.1;NP_001305979.1;NP_004625.2	32	NP_001003694.1	0 genes:. 4 proteins in this group did not match any genes. NP_001003694.1:peregrin isoform 1 [Homo sapiens] ;NP_001305978.1:peregrin isoform 3 [Homo sapiens] ;NP_001305979.1:peregrin isoform 4 [Homo sapiens] ;NP_004625.2:peregrin isoform 2 [Homo sapiens] ;	0	0	0	0	0	0	0	0	0	0	0	0	0	0	0	0	0	0	0	0	0.00019812	0	0	0	0	0
20	o	9	0.07	Q	20	C14orf166		14		[1..244]	[RLL]	[Putative carnitine deficiency-associated protein; pfam10036]	[20][62][98]	[acetylation][acetylation][acetylation]	[N6-acetyllysine. {ECO:0000244|PubMed:19608861}; propagated from UniProtKB/Swiss-Prot (Q9Y224.1)][N6-acetyllysine. {ECO:0000244|PubMed:19608861}; propagated from UniProtKB/Swiss-Prot (Q9Y224.1)][N6-acetyllysine. {ECO:0000244|PubMed:19608861}; propagated from UniProtKB/Swiss-Prot (Q9Y224.1)]				1	NP_057123.1	36	NP_057123.1	UPF0568 protein C14orf166 [Homo sapiens]	0	0	0	0	0	0	0	0	0	0	0	0	0	0	0	0	0	0	0	0	0	0.00023436	0	0	0	0
21						LAMA3		18		[77..123][124..176][236..496][399..779][408..551][483..647][679..807][781..959][993..1133][1160..1292][1385..1525][1549..1700]	[EGF_Lam][EGF_Lam][Laminin_I][Tar][ApoLp-III_like][ApoLp-III_like][Laminin_II][LamG][LamG][LamG][LamG][LamG]	[Laminin-type epidermal growth factor-like domain; laminins are the major noncollagenous components of basement membranes that mediate cell adhesion, growth migration, and differentiation; the laminin-type epidermal growth factor-like module occurs in...; cd00055][Laminin-type epidermal growth factor-like domain; laminins are the major noncollagenous components of basement membranes that mediate …	[order(78,80,87,94,97,106)][order(125,127,137,146,148,157)]	[other][other]	[EGF-like motif][EGF-like motif]				4	NP_000218.3;NP_001121189.2;NP_001121190.2;NP_937762.2	37	NP_000218.3	0 genes:. 4 proteins in this group did not match any genes. NP_000218.3:laminin subunit alpha-3 isoform 2 precursor [Homo sapiens] ;NP_001121189.2:laminin subunit alpha-3 isoform 3 precursor [Homo sapiens] ;NP_001121190.2:laminin subunit alpha-3 isoform 4 precursor [Homo sapiens] ;NP_937762.2:laminin subunit alpha-3 isoform 1 precursor [Homo sapiens] ;	0	0	0	0	0	0	0	0	0	0	0	0	0	0	0	0	0.00538388	0	0	0	0	0	0	0	0	0
22	o	16	0.022	Q	0	RPL31		2		[17..100]	[Ribosomal_L31e]	[Eukaryotic/archaeal ribosomal protein L31; cd00463]	[1][order(28,38..40,42..44,46..47,50,55..56,62..65,69..70,][75][98][98][103]	[acetylation][other][acetylation][phosphorylation][phosphorylation][phosphorylation]	[N-acetylmethionine; propagated from UniProtKB/Swiss-Prot (P62899.1)][23S rRNA binding site [nucleotide binding]][N6-acetyllysine, alternate; propagated from UniProtKB/Swiss-Prot (P62899.1)][][Phosphoserine; propagated from UniProtKB/Swiss-Prot (P62899.1)][]				3	NP_000984.1;NP_001092047.1;NP_001093163.1	39	NP_000984.1	0 genes:. 3 proteins in this group did not match any genes. NP_000984.1:60S ribosomal protein L31 isoform 1 [Homo sapiens] ;NP_001092047.1:60S ribosomal protein L31 isoform 2 [Homo sapiens] ;NP_001093163.1:60S ribosomal protein L31 isoform 3 [Homo sapiens] ;	0	0	0	0	0	0	0	0	0	0	0	0.00168168	0	0	0	0	0	0	0	0	0.00386736	0	0	0	0	0
23						SLF2		10		[137..149][652..1032]	[APIM motif][FAM178]	[propagated from UniProtKB/Swiss-Prot (Q8IX21.2)][Family of unknown function, FAM178; pfam14816]	[603][607][614]	[phosphorylation][phosphorylation][phosphorylation]	[Phosphoserine. {ECO:0000244|PubMed:21406692}; propagated from UniProtKB/Swiss-Prot (Q8IX21.2)][Phosphoserine. {ECO:0000244|PubMed:21406692}; propagated from UniProtKB/Swiss-Prot (Q8IX21.2)][Phosphoserine. {ECO:0000244|PubMed:21406692}; propagated from UniProtKB/Swiss-Prot (Q8IX21.2)]				2	NP_001129595.1;NP_060591.3	42	NP_001129595.1	0 genes:. 2 proteins in this group did not match any genes. NP_001129595.1:SMC5-SMC6 complex localization factor protein 2 isoform 2 [Homo sapiens] ;NP_060591.3:SMC5-SMC6 complex localization factor protein 2 isoform 1 [Homo sapiens] ;	0	0	0	0	0	0	0	0	0	0	0	0	0	0	0	0	0	0	0	0	0	0	2.595e-05	0	0	0
24	o	27	0.405	S	30	PPIF		10	5.2.1.8	[46..204]	[cyclophilin_ABH_like]	[cyclophilin_ABH_like: Cyclophilin A, B and H-like cyclophilin-type peptidylprolyl cis- trans isomerase (PPIase) domain. This family represents the archetypal cystolic cyclophilin similar to human cyclophilins A, B and H. PPIase is an enzyme which...; cd01926]	[67][67][86][order(96..97,102,153,155,163)][167][175][190][203]	[acetylation][modified][modified][active][acetylation][modified][modified][nitrosylation]	[N6-acetyllysine, alternate. {ECO:0000250}; propagated from UniProtKB/Swiss-Prot (P30405.1)][N6-succinyllysine, alternate. {ECO:0000250}; propagated from UniProtKB/Swiss-Prot (P30405.1)][N6-succinyllysine. {ECO:0000250}; propagated from UniProtKB/Swiss-Prot (P30405.1)][][N6-acetyllysine. {ECO:0000250}; propagated from UniProtKB/Swiss-Prot (P30405.1)][N6-succinyllysine. {ECO:0000250}; propagated f…				1	NP_005720.1	43	NP_005720.1	peptidyl-prolyl cis-trans isomerase F, mitochondrial precursor [Homo sapiens]	0	0	0	0	0	0	0	0	0	0	0	0	0	0	0	0	0	0	0	0	0	0.00055249	0.00267606	0.0161364	0.00524584	0
25	o	31	0.027	Q	31	SPATA5		4		[65..133][370..882][385..522][630..796]	[CDC48_N][SpoVK][AAA][AAA]	[Cell division protein 48 (CDC48), N-terminal domain; cl21693][AAA+-type ATPase, SpoVK/Ycf46/Vps4 family [Cell wall/membrane/envelope biogenesis, Cell cycle control, cell division, chromosome partitioning, Signal transduction mechanisms]; COG0464][The AAA+ (ATPases Associated with a wide variety of cellular Activities) superfamily represents an ancient group of ATPases belonging to the ASCE (for …	[272][274][279][394..401][order(395..402,453,500)][449..454][514][668..675][order(669..676,727,773)][723..728][787]	[phosphorylation][phosphorylation][phosphorylation][other][other][other][other][other][other][other][other]	[Phosphothreonine. {ECO:0000244|PubMed:20068231}; propagated from UniProtKB/Swiss-Prot (Q8NB90.3)][Phosphoserine. {ECO:0000244|PubMed:20068231}; propagated from UniProtKB/Swiss-Prot (Q8NB90.3)][Phosphoserine. {ECO:0000244|PubMed:20068231}; propagated from UniProtKB/Swiss-Prot (Q8NB90.3)][Walker A motif][ATP binding site [chemical binding]][Walker B motif][arginine finger][Walker A motif][ATP bind…				1	NP_660208.2	45	NP_660208.2	spermatogenesis-associated protein 5 isoform 1 [Homo sapiens]	0	0	0	0	0	0	0	0.00036116	0	0	0	0.0002354	0	0	0	0	0	0	0	0	0	0	0	0	0	0
26	o	41	0.072	Q	0	TARDBP		1		[105..181][106..175][191..261][193..252]	[RRM1_TDP43][RRM][RRM2_TDP43][RRM_6]	[RNA recognition motif 1 in TAR DNA-binding protein 43 (TDP-43) and similar proteins; cd12321][RNA recognition motif; smart00360][RNA recognition motif 2 in TAR DNA-binding protein 43 (TDP-43) and similar proteins; cd12322][RNA recognition motif (a.k.a. RRM, RBD, or RNP domain); pfam14259]	[91][92][157][order(192,194,196..197,221,227,229,231,258..261)][292]	[phosphorylation][phosphorylation][phosphorylation][DNA binding][phosphorylation]	[][][][DNA binding site [nucleotide binding]][Phosphoserine; propagated from UniProtKB/Swiss-Prot (Q13148.1)]				1	NP_031401.1	49	NP_031401.1	TAR DNA-binding protein 43 [Homo sapiens]	0	0	0	0	0	0.0010587	0	0.00194758	0	0.00106356	0	0.00101551	0	0.00452019	0	0	0	0	0	0.00074977	0.00116768	0.00013812	0.00014867	0	0	0
27	i53-75o	62	0.205	S	62	LPCAT1		5	2.3.1.23;2.3.1.67	[103..314][135..140][<378..476][432..483][531..534]	[LPLAT_LPCAT1-like][HXXXXD motif][FRQ1][EF-hand_8][Di-lysine motif]	[Lysophospholipid Acyltransferases (LPLATs) of Glycerophospholipid Biosynthesis: LPCAT1-like; cd07991][propagated from UniProtKB/Swiss-Prot (Q8NF37.2)][Ca2+-binding protein, EF-hand superfamily [Signal transduction mechanisms]; COG5126][EF-hand domain pair; pfam13833][propagated from UniProtKB/Swiss-Prot (Q8NF37.2)]	[58..78][order(135,138,140,153..156,209..211)]	[transmembrane region][other]	[propagated from UniProtKB/Swiss-Prot (Q8NF37.2)][putative acyl-acceptor binding pocket]				1	NP_079106.3	52	NP_079106.3	lysophosphatidylcholine acyltransferase 1 [Homo sapiens]	0	0	0	0	0	0	0	0.00060397	0	0	0	0	0	0	0	0	0	0	0	0	0	0	0	0	0	0
28	o	3	0.257	Q	17	CHCHD1		10		[45..79]	[CHCH]	[CHCH domain; pfam06747]							1	NP_976043.1	54	NP_976043.1	coiled-coil-helix-coiled-coil-helix domain-containing protein 1 [Homo sapiens]	0	0	0	0	0	0	0	0	0	0	0	0	0	0	0	0	0	0	0	0	0	0	0	0	0.00460122	0
29	o	21	0.183	Q	29	PHF5A		22		[2..106]	[PHF5]	[PHF5-like protein; pfam03660]	[2][3]	[acetylation][acetylation]	[N-acetylalanine. {ECO:0000250|UniProtKB:P83870}; propagated from UniProtKB/Swiss-Prot (Q7RTV0.1)][N6-acetyllysine. {ECO:0000244|PubMed:19608861}; propagated from UniProtKB/Swiss-Prot (Q7RTV0.1)]				1	NP_116147.1	56	NP_116147.1	PHD finger-like domain-containing protein 5A [Homo sapiens]	0	0	0	0	0	0	0	0	0	0	0	0	0	0	0	0	0	0	0	0.00056437	0.00219736	0.00051984	0.00251793	0.0113872	0.0148076	0.0171699
30	o	35	0.056	Q	0	TRIAP1		12		[3..71]	[UPF0203]	[Uncharacterized protein family (UPF0203); pfam05254]	[1]	[acetylation]	[N-acetylmethionine; propagated from UniProtKB/Swiss-Prot (O43715.1)]				1	NP_057483.1	58	NP_057483.1	TP53-regulated inhibitor of apoptosis 1 [Homo sapiens]	0	0	0	0	0	0	0	0	0	0	0	0	0	0	0	0	0	0	0	0	0	0	0.00161972	0	0	0
31	o	40	0.038	Q	0	TP53		17		[1..320][1..83][1..44][5..29][17..25][40][48..56][66..110][100..370][100..300][109..288][113..236][116..292][241..248][256..294][273..280][300..393][305..321][319..360][324..359][325..356][339..350][359..363][368..387][370..372]	[Interaction with CCAR2. {ECO:0000269|PubMed:25732823}][Interaction with HRMT1L2][Transcription activation (acidic)][P53_TAD][TADI][alternative start codon][TADII][Interaction with WWOX][Interaction with HIPK1. {ECO:0000250}][Required for interaction with ZNF385A][P53][Required for interaction with FBXO42][Interaction with AXIN1. {ECO:0000250}][Interacts with the 53BP2 SH3 domain][Interaction wit…	[propagated from UniProtKB/Swiss-Prot (P04637.4)][propagated from UniProtKB/Swiss-Prot (P04637.4)][propagated from UniProtKB/Swiss-Prot (P04637.4)][P53 transactivation motif; pfam08563][propagated from UniProtKB/Swiss-Prot (P04637.4)][delta40p53alpha][propagated from UniProtKB/Swiss-Prot (P04637.4)][propagated from UniProtKB/Swiss-Prot (P04637.4)][propagated from UniProtKB/Swiss-Prot (P04637.4)][…	[9][15][18][20][33][37][46][55][120][120][order(176,179,238,242)][order(177..179,181)][183][order(239,241,248,273,275..277,280)][269][284][305][315][321][370][372][373][373][381][382][382][392]	[phosphorylation][phosphorylation][phosphorylation][phosphorylation][phosphorylation][phosphorylation][phosphorylation][phosphorylation][other][acetylation][other][other][phosphorylation][DNA binding][phosphorylation][phosphorylation][acetylation][phosphorylation][acetylation][methylation][methylation][methylation][acetylation][acetylation][methylation][acetylation][phosphorylation]	[Phosphoserine, by HIPK4. {ECO:0000269|PubMed:18022393}; propagated from UniProtKB/Swiss-Prot (P04637.4)][Phosphoserine, by CDK5, PRPK, AMPK, NUAK1 and ATM. {ECO:0000269|PubMed:10570149, ECO:0000269|PubMed:11554766, ECO:0000269|PubMed:15701641, ECO:0000269|PubMed:15866171, ECO:0000269|PubMed:17108107, ECO:0000269|PubMed:17591690, ECO:0000269|PubMed:17967874, ECO:0000269|PubMed:21317932}; propagat…				4	NP_001119584.1;NP_001119587.1;NP_001263626.1;NP_001263690.1	59	NP_001119584.1	0 genes:. 4 proteins in this group did not match any genes. NP_001119584.1:cellular tumor antigen p53 isoform a [Homo sapiens] ;NP_001119587.1:cellular tumor antigen p53 isoform d [Homo sapiens] ;NP_001263626.1:cellular tumor antigen p53 isoform j [Homo sapiens] ;NP_001263690.1:cellular tumor antigen p53 isoform g [Homo sapiens] ;	0	0	0	0	0	0	0	0	0	0	0	0	0	0	0	0	0	0	0	0	0	0.00058201	0.00046984	0	0	0
32	o	7	0.143	Q	0	PTGES3		12	5.3.99.3	[3..109]	[p23]	[p23 binds heat shock protein (Hsp)90 and participates in the folding of a number of Hsp90 clients, including the progesterone receptor. p23 also has a passive chaperoning activity and in addition may participate in prostaglandin synthesis; cd00237]	[order(8,53,87..90,99,103,106)][order(56,58,88,91..93)]	[other][other]	[putative Hsp90 binding site [polypeptide binding]][putative dimer interface [polypeptide binding]]				6	NP_001269530.1;NP_001269531.1;NP_001269532.1;NP_001269533.1;NP_001269534.1;NP_006592.3	63	NP_001269530.1	0 genes:. 6 proteins in this group did not match any genes. NP_001269530.1:prostaglandin E synthase 3 isoform b [Homo sapiens] ;NP_001269531.1:prostaglandin E synthase 3 isoform c [Homo sapiens] ;NP_001269532.1:prostaglandin E synthase 3 isoform d [Homo sapiens] ;NP_001269533.1:prostaglandin E synthase 3 isoform e [Homo sapiens] ;NP_001269534.1:prostaglandin E synthase 3 isoform f [Homo sapiens] …	0	0	0	0	0	0	0	0	0	0	0	0	0	0	0	0	0	0	0	0	0	0.00082277	0.0002214	0	0	0
33	o	28	0.061	Q	23	MED8		1		[2..268]	[Med8]	[Mediator of RNA polymerase II transcription complex subunit 8; pfam10232]							2	NP_443109.2;NP_963836.2	64	NP_443109.2	0 genes:. 2 proteins in this group did not match any genes. NP_443109.2:mediator of RNA polymerase II transcription subunit 8 isoform 3 [Homo sapiens] ;NP_963836.2:mediator of RNA polymerase II transcription subunit 8 isoform 4 [Homo sapiens] ;	0	0	0	0	0	0	0	0	0	0.00073142	0	0	0	0	0	0	0	0	0	0	0	0	0	0	0	0
34	o	2	0.03	Q	0	SPTBN1		2		[55..158][174..277][302..412][303..411][422..525][423..525][530..743][530..636][639..742][642..849][745..847][851..1061][851..952][957..1060][958..1169][988..1249][1063..1166][1169..1257][1171..1380][1276..1376][1381..1592][1381..1482][1486..1590][1563..2093][1593..1805][1806..2027][2017..>2075][2018..2097][2149..2177][2200..2305]	[CH][CH][Spectrin][Spectrin 1][Spectrin][Spectrin 2][SPEC][Spectrin 3][Spectrin 4][SPEC][Spectrin 5][SPEC][Spectrin 6][Spectrin 7][SPEC][Laminin_I][Spectrin 8][Spectrin 9][SPEC][Spectrin 10][SPEC][Spectrin 11][Spectrin 12][Interaction with ANK2][SPEC][SPEC][Spectrin][Spectrin 17][Mediates interaction with CAMSAP1][PH_beta_spectrin]	[Calponin homology domain; actin-binding domain which may be present as a single copy or in tandem repeats (which increases binding affinity). The CH domain is found in cytoskeletal and signal transduction proteins, including actin-binding proteins like...; cd00014][Calponin homology domain; actin-binding domain which may be present as a single copy or in tandem repeats (which increases binding a…	[2][36][order(55..56,58..60,63,66,120..121,124,127,129,144..145,][90][order(174..175,177..179,182,185,238..239,242,246,248,][228][346][637..642][743..748][796][808][817][825][903][954..959][1057][1061..1066][1076][1079][1108][1237][1274..1279][1388][1447][1484..1489][1557][1697..1702][1805][1815][1910..1915][1913][1957][1989][2102][2102][2102][2106][2110][2128][2128][2138][2138][2138][2147][2148]…	[acetylation][phosphorylation][other][acetylation][other][phosphorylation][phosphorylation][other][other][phosphorylation][phosphorylation][phosphorylation][phosphorylation][phosphorylation][other][phosphorylation][other][phosphorylation][phosphorylation][modified][phosphorylation][other][phosphorylation][phosphorylation][other][phosphorylation][other][phosphorylation][acetylation][other][acetyla…	[N-acetylthreonine. {ECO:0000244|PubMed:19413330, ECO:0000244|PubMed:22223895, ECO:0000244|PubMed:22814378}; propagated from UniProtKB/Swiss-Prot (Q01082.2)][Phosphoserine. {ECO:0000250|UniProtKB:Q62261}; propagated from UniProtKB/Swiss-Prot (Q01082.2)][putative actin binding surface [polypeptide binding]][N6-acetyllysine. {ECO:0000244|PubMed:19608861}; propagated from UniProtKB/Swiss-Prot (Q0108…				1	NP_003119.2	70	NP_003119.2	spectrin beta chain, non-erythrocytic 1 isoform 1 [Homo sapiens]	0	0	0	0	0.00226907	0.00166866	0	0.00020464	0	0	0	0	0	0	0	0	0	0	0	0.00026261	0.00020449	2.419e-05	2.604e-05	0	0	0
35	o	36	0.022	Q	0	POLR2D		2	2.7.7.6	[24..141]	[RPOL4c]	[DNA-directed RNA-polymerase II subunit; smart00657]							1	NP_004796.1	71	NP_004796.1	DNA-directed RNA polymerase II subunit RPB4 [Homo sapiens]	0	0	0	0	0	0	0	0	0	0	0	0	0	0	0	0	0	0	0	0	0.00680874	0.00241617	0.00021672	0	0	0
36	o	44	0.02	Q	0	CBX3		7		[28..78][123..175]	[CHROMO][ChSh]	[Chromatin organization modifier (chromo) domain is a conserved region of around 50 amino acids found in a variety of chromosomal proteins, which appear to play a role in the functional organization of the eukaryotic nucleus. Experimental evidence...; cd00024][Chromo Shadow Domain, found in association with N-terminal chromo (CHRromatin Organization MOdifier) domain; Chromo domains mediate the in…	[2][5][10][order(30,49,51,54,58,62,66..67)][44][50][93][93][95][95][97][97][99][99][102][order(129,136,157,165,168,172)][order(165,168)][173][176][176]	[acetylation][acetylation][acetylation][other][acetylation][acetylation][phosphorylation][phosphorylation][phosphorylation][phosphorylation][phosphorylation][phosphorylation][phosphorylation][phosphorylation][phosphorylation][other][other][phosphorylation][phosphorylation][phosphorylation]	[N-acetylalanine. {ECO:0000250|UniProtKB:P23198}; propagated from UniProtKB/Swiss-Prot (Q13185.4)][N6-acetyllysine, alternate. {ECO:0000250|UniProtKB:P23198}; propagated from UniProtKB/Swiss-Prot (Q13185.4)][N6-acetyllysine, alternate. {ECO:0000244|PubMed:19608861}; propagated from UniProtKB/Swiss-Prot (Q13185.4)][histone binding site][N6-acetyllysine. {ECO:0000244|PubMed:19608861}; propagated fr…				1	NP_057671.2	72	NP_057671.2	chromobox protein homolog 3 [Homo sapiens]	0	0	0	0	0.00366399	0.00479017	0	0	0	0.00060152	0	0	0	0.0272693	0	0.0327626	0	0	0.0258232	0.0181712	0.014529	0.00344614	0	0	0	0
37	o	41	0.028	Q	0	FAM136A		2		[3..133]	[DUF842]	[Eukaryotic protein of unknown function (DUF842); pfam05811]	[2][124][126]	[acetylation][phosphorylation][phosphorylation]	[N-acetylalanine. {ECO:0000244|PubMed:19413330}; propagated from UniProtKB/Swiss-Prot (Q96C01.1)][Phosphothreonine. {ECO:0000250|UniProtKB:B0BN94}; propagated from UniProtKB/Swiss-Prot (Q96C01.1)][Phosphothreonine. {ECO:0000250|UniProtKB:B0BN94}; propagated from UniProtKB/Swiss-Prot (Q96C01.1)]				1	NP_116211.2	73	NP_116211.2	protein FAM136A [Homo sapiens]	0	0	0	0	0	0	0	0	0	0	0	0	0	0	0	0	0	0	0	0	0.00175152	0.00082873	0.00156104	0	0	0
38	o	19	0.065	Q	19	MFAP1		15		[189..436]	[Prp19_bind]	[Splicing factor, Prp19-binding domain; pfam06991]	[2][52][52][53][53][116][116][118][118][132][132][133][133][267][267]	[acetylation][phosphorylation][phosphorylation][phosphorylation][phosphorylation][phosphorylation][phosphorylation][phosphorylation][phosphorylation][phosphorylation][phosphorylation][phosphorylation][phosphorylation][phosphorylation][phosphorylation]	[N-acetylserine. {ECO:0000244|PubMed:22223895, ECO:0000244|PubMed:22814378}; propagated from UniProtKB/Swiss-Prot (P55081.2)][][Phosphoserine. {ECO:0000244|PubMed:18669648, ECO:0000244|PubMed:19690332, ECO:0000244|PubMed:20068231, ECO:0000244|PubMed:21406692}; propagated from UniProtKB/Swiss-Prot (P55081.2)][][Phosphoserine. {ECO:0000244|PubMed:18669648, ECO:0000244|PubMed:19690332, ECO:0000244|P…				1	NP_005917.2	77	NP_005917.2	microfibrillar-associated protein 1 [Homo sapiens]	0	0	0	0	0	0	0	0	0	0	0	0	0	0	0	0.00191203	0	0	0	0.00014141	0	0.00013026	0	0	0	0
39	o	33	0.042	Q	33	HNRNPA1		12		[12..92][15..85][105..181][106..177][257..292]	[RRM1_hnRNPA1][RRM][RRM2_hnRNPA1][RRM][HnRNPA1]	[RNA recognition motif 1 in heterogeneous nuclear ribonucleoprotein A1 (hnRNP A1) and similar proteins; cd12761][RNA recognition motif; smart00360][RNA recognition motif 2 in heterogeneous nuclear ribonucleoprotein A1 (hnRNP A1) and similar proteins; cd12580][RNA recognition motif; smart00360][Nuclear factor hnRNPA1; pfam11627]	[2][4][6][6][order(12,15,17,19..20,42,44,46,55..57,59,82,85,87..92)][194][206][218][225][295][295]	[phosphorylation][phosphorylation][phosphorylation][phosphorylation][DNA binding][methylation][methylation][methylation][methylation][phosphorylation][phosphorylation]	[][][][][DNA binding site [nucleotide binding]][][][][][][]				2	NP_002127.1;NP_112420.1	78	NP_002127.1	0 genes:. 2 proteins in this group did not match any genes. NP_002127.1:heterogeneous nuclear ribonucleoprotein A1 isoform a [Homo sapiens] ;NP_112420.1:heterogeneous nuclear ribonucleoprotein A1 isoform b [Homo sapiens] ;	0	0	0	0	0	0	0	0	0	0	0	0	0	0	0	0	0	0	0	0	0.00151069	0.00339522	0.0036545	0.00260955	0.0050901	0
40	i60-79o84-106i260-279o299-321i759-781o836-858i930-949o	7	0.037	Q	24	ATP2A2		12	3.6.3.8	[4..72][53..988][93..341][370..400][418..527][575..594][<597..711][783..986][787..807]	[Cation_ATPase_N][ATPase-IIA1_Ca][E1-E2_ATPase][Interacts with phospholamban 1. {ECO:0000250}][Hydrolase_like2][Interacts with HAX1][HAD][Cation_ATPase_C][Interacts with phospholamban 2. {ECO:0000250}]	[Cation transporter/ATPase, N-terminus; pfam00690][sarco/endoplasmic reticulum calcium-translocating P-type ATPase; TIGR01116][E1-E2 ATPase; pfam00122][propagated from UniProtKB/Swiss-Prot (P16615.1)][Putative hydrolase of sodium-potassium ATPase alpha subunit; pfam13246][propagated from UniProtKB/Swiss-Prot (P16615.1)][haloacid dehalogenase-like hydrolase; pfam12710][Cation transporting ATPase, …	[38][38][49..69][90..110][254..273][294][295][296..313][531][580][624][663][663][757..776][787..807][828..850][897..916][930..948][964..984]	[phosphorylation][phosphorylation][transmembrane region][transmembrane region][transmembrane region][modified][modified][transmembrane region][phosphorylation][phosphorylation][other][phosphorylation][phosphorylation][transmembrane region][transmembrane region][transmembrane region][transmembrane region][transmembrane region][transmembrane region]	[][Phosphoserine. {ECO:0000250|UniProtKB:O55143}; propagated from UniProtKB/Swiss-Prot (P16615.1)][propagated from UniProtKB/Swiss-Prot (P16615.1)][propagated from UniProtKB/Swiss-Prot (P16615.1)][propagated from UniProtKB/Swiss-Prot (P16615.1)][Nitrated tyrosine. {ECO:0000269|PubMed:16399855}; propagated from UniProtKB/Swiss-Prot (P16615.1)][Nitrated tyrosine. {ECO:0000269|PubMed:16399855}; prop…				2	NP_001672.1;NP_733765.1	80	NP_001672.1	0 genes:. 2 proteins in this group did not match any genes. NP_001672.1:sarcoplasmic/endoplasmic reticulum calcium ATPase 2 isoform a [Homo sapiens] ;NP_733765.1:sarcoplasmic/endoplasmic reticulum calcium ATPase 2 isoform b [Homo sapiens] ;	0	0	0	0	0	0.00153867	0	0.00048523	0	0.0011041	0	0	0	0	0	0	0	0	0	0	0	0	0	0	0	0
41	o	37	0.025	Q	0	DCLK1		13	2.7.11.1	[57..139][186..265][383..650][390..647]	[DCX][DCX][STKc_DCKL1][S_TKc]	[Ubiquitin-like domain of DCX; cd01617][Ubiquitin-like domain of DCX; cd01617][Catalytic domain of the Serine/Threonine Kinase, Doublecortin-like kinase 1 (also called Doublecortin-like and CAM kinase-like 1); cd14183][Serine/Threonine protein kinases, catalytic domain; smart00220]	[32][36][46][order(63,68..69,73,77,80,91,104,116,129..130,133)][order(63,66,75,90,93,104,106,108,129)][order(192,197..198,202,206,209,220,230,242,255..256,259)][order(192,195,204,219,222,230,232,234,255)][305][307][330][332][334][337][347][352][352][353][355][364][376][order(396..400,404,417,419,449,465..468,472,474,510..511,][order(396..399,404,417,419,449,465..468,472,515..516,518,][order(400,4…	[phosphorylation][phosphorylation][phosphorylation][other][other][other][other][phosphorylation][phosphorylation][phosphorylation][phosphorylation][phosphorylation][phosphorylation][phosphorylation][phosphorylation][phosphorylation][phosphorylation][phosphorylation][phosphorylation][phosphorylation][active][other][other][phosphorylation][other]	[Phosphoserine. {ECO:0000250|UniProtKB:Q9JLM8}; propagated from UniProtKB/Swiss-Prot (O15075.2)][Phosphoserine. {ECO:0000250|UniProtKB:Q9JLM8}; propagated from UniProtKB/Swiss-Prot (O15075.2)][Phosphothreonine. {ECO:0000250|UniProtKB:Q9JLM8}; propagated from UniProtKB/Swiss-Prot (O15075.2)][XLIS mutations][SBH mutations][XLIS mutations][SBH mutations][Phosphoserine. {ECO:0000250|UniProtKB:Q9JLM8}…				1	NP_004725.1	83	NP_004725.1	serine/threonine-protein kinase DCLK1 isoform 1 [Homo sapiens]	0	0	0	0	0	0	0	0	0	0	0	0	0	0	0	0	0	0	0	8.516e-05	0	0	0	0	0	0
42	o460-482i	29	0.042	Q	0	ACBD5		10		[8..96]	[ACBP]	[Acyl CoA binding protein (ACBP) binds thiol esters of long fatty acids and coenzyme A in a one-to-one binding mode with high specificity and affinity. Acyl-CoAs are important intermediates in fatty lipid synthesis and fatty acid degradation and play a...; cd00435]	[order(16,19..20,22,25,30,32,35..36,38..39,42..43,60..61,][order(20,39,42..43,65,84)][152][156]	[other][other][phosphorylation][phosphorylation]	[acyl-CoA binding pocket [chemical binding]][CoA binding site [chemical binding]][][]				5	NP_001035938.1;NP_001258441.1;NP_001288182.1;NP_001288183.1;NP_663736.2	84	NP_001035938.1	0 genes:. 5 proteins in this group did not match any genes. NP_001035938.1:acyl-CoA-binding domain-containing protein 5 isoform 2 [Homo sapiens] ;NP_001258441.1:acyl-CoA-binding domain-containing protein 5 isoform 3 [Homo sapiens] ;NP_001288182.1:acyl-CoA-binding domain-containing protein 5 isoform 4 [Homo sapiens] ;NP_001288183.1:acyl-CoA-binding domain-containing protein 5 isoform 5 [Homo sapie…	0	0	0	0	0	0	0	0	0	0	0	0	0	0	0	0	0	0	0	0.0001267	0	0	0	0	0	0
43	o	19	0.732	S	19	RETN		19		[18..106]	[Resistin]	[Resistin; pfam06954]							1	NP_065148.1	86	NP_065148.1	resistin precursor [Homo sapiens]	0	0	0	0	0	0	0	0	0	0	0	0	0	0	0	0	0	0	0	0.00057482	0	0	0	0	0	0
44	o	5	0.115	Q	0	CHCHD4		3		[64..100]	[CHCH]	[CHCH domain; pfam06747]							2	NP_001091972.1;NP_653237.1	90	NP_001091972.1	0 genes:. 2 proteins in this group did not match any genes. NP_001091972.1:mitochondrial intermembrane space import and assembly protein 40 isoform 1 [Homo sapiens] ;NP_653237.1:mitochondrial intermembrane space import and assembly protein 40 isoform 2 [Homo sapiens] ;	0	0	0	0	0	0	0	0	0	0	0	0	0	0	0	0	0	0	0	0	0	0.00080539	0	0	0	0
45						TAGLN2		1		[35..209][46..157][195..219]	[SCP1][CH][Calponin]	[Calponin [Cytoskeleton]; COG5199][Calponin homology domain; actin-binding domain which may be present as a single copy or in tandem repeats (which increases binding affinity). The CH domain is found in cytoskeletal and signal transduction proteins, including actin-binding proteins like...; cd00014][Calponin family repeat; pfam00402]	[order(46..47,49..51,54,57,118..119,122,125,127,144..145,]	[other]	[putative actin binding surface [polypeptide binding]]				2	NP_001264153.1;NP_003555.1	96	NP_001264153.1	0 genes:. 2 proteins in this group did not match any genes. NP_001264153.1:transgelin-2 isoform a [Homo sapiens] ;NP_003555.1:transgelin-2 isoform b [Homo sapiens] ;	0	0	0	0	0	0	0	0	0	0	0	0	0	0	0	0	0	0	0	0	0	0	0.00083931	0	0	0
46	o	16	0.148	Q	25	BAZ1B		7	2.7.10.2	[1..345][20..120][207..213][604..668][724..773][785..>895][899..936][991..1032][1186..1231][1344..1440]	[Mediates the tyrosine-protein kinase activity][WAC_Acf1_DNA_bd][C motif][DDT][WHIM1][tolA_full][WHIM2][WHIM3][PHD_BAZ1B][Bromo_WSTF_like]	[propagated from UniProtKB/Swiss-Prot (Q9UIG0.2)][ATP-utilizing chromatin assembly and remodelling N-terminal; pfam10537][propagated from UniProtKB/Swiss-Prot (Q9UIG0.2)][domain in different transcription and chromosome remodeling factors; smart00571][WSTF, HB1, Itc1p, MBD9 motif 1; pfam15612][TolA protein; TIGR02794][WSTF, HB1, Itc1p, MBD9 motif 2; pfam15613][WSTF, HB1, Itc1p, MBD9 motif 3; pfam…	[160][167][189][266][318][330][345][347][349][361][361][374][699][705][705][708][708][716][945][947][1147][order(1186,1198..1202,1206,1226)][order(1187,1190,1202,1205,1210,1213,1228,1231)][1315][1342][1342][order(1368,1373,1376,1415,1419,1425)][1468][1468][1468]	[phosphorylation][phosphorylation][phosphorylation][phosphorylation][phosphorylation][phosphorylation][phosphorylation][phosphorylation][phosphorylation][phosphorylation][phosphorylation][phosphorylation][phosphorylation][phosphorylation][phosphorylation][phosphorylation][phosphorylation][phosphorylation][phosphorylation][phosphorylation][phosphorylation][other][other][phosphorylation][phosphoryl…	[][][][Phosphothreonine; propagated from UniProtKB/Swiss-Prot (Q9UIG0.2)][][Phosphoserine; propagated from UniProtKB/Swiss-Prot (Q9UIG0.2)][Phosphoserine; propagated from UniProtKB/Swiss-Prot (Q9UIG0.2)][Phosphoserine; propagated from UniProtKB/Swiss-Prot (Q9UIG0.2)][Phosphoserine; propagated from UniProtKB/Swiss-Prot (Q9UIG0.2)][][Phosphoserine; propagated from UniProtKB/Swiss-Prot (Q9UIG0.2)][P…				1	NP_115784.1	98	NP_115784.1	tyrosine-protein kinase BAZ1B [Homo sapiens]	0	0	0	0	0	0	0	0	0	0	0	0	0	0	0	0	0	0	0	0.00025117	0.00016299	0	4.15e-05	0	0	0
47	i13-35o	35	0.527	A	35	CPED1		7		[584..667]	[Cadherin-like]	[Cadherin-like beta sandwich domain; pfam12733]							2	NP_001099003.1;NP_079189.4	101	NP_001099003.1	0 genes:. 2 proteins in this group did not match any genes. NP_001099003.1:cadherin-like and PC-esterase domain-containing protein 1 isoform 2 precursor [Homo sapiens] ;NP_079189.4:cadherin-like and PC-esterase domain-containing protein 1 isoform 1 precursor [Homo sapiens] ;	0.00048044	0	0	0	0	0	0	0	0	0	0	0	0	0	0	0	0	0	0	0	0	0	0	0	0	0
48	o	3	0.275	Q	23	PPIG		2	5.2.1.8	[8..175]	[cyclophilin]	[cyclophilin: cyclophilin-type peptidylprolyl cis- trans isomerases. This family contains eukaryotic, bacterial and archeal proteins which exhibit a peptidylprolyl cis- trans isomerases activity (PPIase, Rotamase) and in addition bind the...; cl00197]	[order(67,69,72..73,75,113..114,123,125,133..134,138)][254][254][256][256][257][257][259][259][290][290][315][315][356][356][358][358][375][397][397][413][413][415][415][568][572][611][687][687][690][690][696][716][717][744][745][745][748][748][753]	[active][phosphorylation][phosphorylation][phosphorylation][phosphorylation][phosphorylation][phosphorylation][phosphorylation][phosphorylation][phosphorylation][phosphorylation][phosphorylation][phosphorylation][phosphorylation][phosphorylation][phosphorylation][phosphorylation][phosphorylation][phosphorylation][phosphorylation][phosphorylation][phosphorylation][phosphorylation][phosphorylation]…	[][][Phosphoserine. {ECO:0000244|PubMed:18669648}; propagated from UniProtKB/Swiss-Prot (Q13427.2)][][Phosphoserine. {ECO:0000244|PubMed:18669648}; propagated from UniProtKB/Swiss-Prot (Q13427.2)][][Phosphoserine. {ECO:0000244|PubMed:18669648}; propagated from UniProtKB/Swiss-Prot (Q13427.2)][][Phosphoserine. {ECO:0000244|PubMed:18669648}; propagated from UniProtKB/Swiss-Prot (Q13427.2)][][Phosph…				1	NP_004783.2	104	NP_004783.2	peptidyl-prolyl cis-trans isomerase G [Homo sapiens]	0	0	0	0	0	0	0	0	0	0	0	0	0	0	0	0	0	0	0	0	0	7.584e-05	8.163e-05	0	0	0
49						CCT5		5		[15..514][15..512]	[TCP1_epsilon][thermosome_arch]	[TCP-1 (CTT or eukaryotic type II) chaperonin family, epsilon subunit. Chaperonins are involved in productive folding of proteins. They share a common general morphology, a double toroid of 2 stacked rings. In contrast to bacterial group I chaperonins...; cd03339][thermosome, various subunits, archaeal; TIGR02339]	[order(31..33,83,87,150,383,401,441,485,487)][order(36..39,41,59,61,65,69,72,371,508..514)][order(421,439,448,450..451,454)]	[other][other][other]	[ATP/Mg binding site [chemical binding]][ring oligomerisation interface [polypeptide binding]][stacking interactions]				5	NP_001293082.1;NP_001293083.1;NP_001293084.1;NP_001293085.1;NP_036205.1	106	NP_001293082.1	0 genes:. 5 proteins in this group did not match any genes. NP_001293082.1:T-complex protein 1 subunit epsilon isoform b [Homo sapiens] ;NP_001293083.1:T-complex protein 1 subunit epsilon isoform c [Homo sapiens] ;NP_001293084.1:T-complex protein 1 subunit epsilon isoform d [Homo sapiens] ;NP_001293085.1:T-complex protein 1 subunit epsilon isoform e [Homo sapiens] ;NP_036205.1:T-complex protein 1…	0	0	0	0	0	0	0	0	0	0	0	0.00202125	0	0	0	0	0	0	0	0.00131325	0	0	0	0	0	0
50	o	32	0.037	Q	0	PIN1		19	5.2.1.8	[8..37][51..162][<53..159]	[WW][Rotamase_2][SurA]	[Two conserved tryptophans domain; also known as the WWP or rsp5 domain; around 40 amino acids; functions as an interaction module in a diverse set of signalling proteins; binds specific proline-rich sequences but at low affinities compared to other...; cd00201][PPIC-type PPIASE domain; cl08278][Parvulin-like peptidyl-prolyl isomerase [Posttranslational modification, protein turnover, chaperones]…	[order(23,34)][46][71][108][108]	[binding][acetylation][phosphorylation][phosphorylation][phosphorylation]	[binding pocket][N6-acetyllysine; propagated from UniProtKB/Swiss-Prot (Q13526.1)][Phosphoserine, by DAPK1; propagated from UniProtKB/Swiss-Prot (Q13526.1)][][Phosphoserine; propagated from UniProtKB/Swiss-Prot (Q13526.1)]				1	NP_006212.1	107	NP_006212.1	peptidyl-prolyl cis-trans isomerase NIMA-interacting 1 [Homo sapiens]	0	0	0	0	0	0	0	0	0	0	0	0	0	0	0	0	0	0	0	0	0	0	0.00094401	0	0	0
51	o	36	0.066	Q	16	TIMM13		19		[26..87][46..69]	[zf-Tim10_DDP][Twin CX3C motif]	[Tim10/DDP family zinc finger; pfam02953][propagated from UniProtKB/Swiss-Prot (Q9Y5L4.1)]	[1][53]	[acetylation][modified]	[N-acetylmethionine. {ECO:0000244|PubMed:19413330, ECO:0000244|PubMed:25944712}; propagated from UniProtKB/Swiss-Prot (Q9Y5L4.1)][N6-succinyllysine. {ECO:0000250|UniProtKB:P62075}; propagated from UniProtKB/Swiss-Prot (Q9Y5L4.1)]				1	NP_036590.1	108	NP_036590.1	mitochondrial import inner membrane translocase subunit Tim13 [Homo sapiens]	0	0	0	0	0	0	0	0	0	0.00695233	0	0	0	0	0	0	0	0	0	0.00784178	0.00508863	0.00060192	0	0	0	0
52	o	3	0.276	Q	18	EXOSC1		10		[8..39][10..161][48..129]	[ECR1_N][Csl4][S1_CSL4]	[Exosome complex exonuclease RRP4 N-terminal region; pfam14382][Exosome complex RNA-binding protein Csl4, contains S1 and Zn-ribbon domains [Translation, ribosomal structure and biogenesis]; COG1096][S1_CSL4: CSL4, S1-like RNA-binding domain. S1-like RNA-binding domains are found in a wide variety of RNA-associated proteins. ScCSL4 protein is a subunit of the exosome complex. The exosome plays a …	[order(51,59,69,71)][order(53..55,57,63,94,99)]	[other][other]	[RNA binding site [nucleotide binding]][subunit interface]				3	NP_001305291.1;NP_001305293.1;NP_057130.1	109	NP_001305291.1	0 genes:. 3 proteins in this group did not match any genes. NP_001305291.1:exosome complex component CSL4 isoform b [Homo sapiens] ;NP_001305293.1:exosome complex component CSL4 isoform d [Homo sapiens] ;NP_057130.1:exosome complex component CSL4 isoform a [Homo sapiens] ;	0	0	0	0	0	0	0	0	0	0	0	0	0	0	0	0	0	0	0	0	0	0.00033637	0.00018103	0	0	0
53	o	21	0.777	S	21	CTSD		11	3.4.23.5	[22..49][73..408][78..409]	[A1_Propeptide][Cathepsin_D2][Asp]	[A1 Propeptide; pfam07966][Cathepsin_D2, pepsin family of proteinases; cd05490][Eukaryotic aspartyl protease; pfam00026]	[64][order(97..100,295..298)][order(97,295)][134][139..149][order(154..158,176..191)][263]	[modified][active][active][glycosylation][active][other][glycosylation]	[proteolytic cleavage site][catalytic motif [active]][catalytic residue [active]][][Active site flap [active]][posttranlational cleavage site [posttranslational modification]][]				1	NP_001900.1	110	NP_001900.1	cathepsin D preproprotein [Homo sapiens]	0.00091307	0	0	0	0	0	0	0	0	0	0	0	0	0	0	0	0	0	0	0.00060273	0	0.00055517	0.00014939	0	0	0
54	o	5	0.055	Q	21	DMAP1		1		[152..199][243..407]	[SANT_DMAP1_like][DMAP1]	[SANT/myb-like domain of Human Dna Methyltransferase 1 Associated Protein 1-like; cd11658][DNA methyltransferase 1-associated protein 1 (DMAP1); pfam05499]	[order(152,186..187,189..190,192..194,196..198)][order(165,168)][445][445][445][448]	[other][other][phosphorylation][phosphorylation][phosphorylation][phosphorylation]	[putative DNA binding site [nucleotide binding]][calcium ion [ion binding]][][][Phosphothreonine; propagated from UniProtKB/Swiss-Prot (Q9NPF5.1)][Phosphoserine; propagated from UniProtKB/Swiss-Prot (Q9NPF5.1)]				1	NP_061973.1	111	NP_061973.1	DNA methyltransferase 1-associated protein 1 [Homo sapiens]	0	0	0	0	0	0.00046927	0	0.00034531	0	0	0	0	0	0	0	0	0	0	0	0	0	0	0	0	0	0
55	o	17	0.049	Q	25	RRP9		3		[8..40][<136..403][139..439][144..183][197..236][239..278][281..320][322..360][374..413][419..460]	[Nuclear localization signal. {ECO:0000255}][WD40][WD40][WD 1][WD 2][WD 3][WD 4][WD 5][WD 6][WD 7]	[propagated from UniProtKB/Swiss-Prot (O43818.1)][WD40 repeat [General function prediction only]; COG2319][WD40 domain, found in a number of eukaryotic proteins that cover a wide variety of functions including adaptor/regulatory modules in signal transduction, pre-mRNA processing and cytoskeleton assembly; typically contains a GH dipeptide 11-24 residues from...; cd00200][propagated from UniProtK…	[50][50][51][51][53][53][57][order(145,163,167,173..174,197..198,216,220,226..227,]	[phosphorylation][phosphorylation][phosphorylation][phosphorylation][phosphorylation][phosphorylation][phosphorylation][other]	[][Phosphoserine. {ECO:0000244|PubMed:18669648, ECO:0000244|PubMed:19690332, ECO:0000244|PubMed:21406692}; propagated from UniProtKB/Swiss-Prot (O43818.1)][][Phosphoserine. {ECO:0000244|PubMed:18669648, ECO:0000244|PubMed:19690332, ECO:0000244|PubMed:21406692}; propagated from UniProtKB/Swiss-Prot (O43818.1)][][Phosphoserine. {ECO:0000244|PubMed:18669648, ECO:0000244|PubMed:19690332, ECO:0000244|…				1	NP_004695.1	112	NP_004695.1	U3 small nucleolar RNA-interacting protein 2 [Homo sapiens]	0	0	0	0	0	0	0	0	0	0	0	0	0	0	0	0	0	0	0	0.00052279	0.00101773	0	0	0	0	0
56	o	39	0.035	Q	16	DENR		12		[113..194]	[DENR_C]	[C-terminal domain of DENR and related proteins; cd11607]	[2][73][73][order(122,125..126,128,146,149..151,153..155,157,167,170)][189]	[acetylation][phosphorylation][phosphorylation][other][phosphorylation]	[N-acetylalanine. {ECO:0000244|PubMed:19413330, ECO:0000244|PubMed:22223895, ECO:0000244|PubMed:22814378}; propagated from UniProtKB/Swiss-Prot (O43583.2)][][Phosphoserine. {ECO:0000244|PubMed:18669648, ECO:0000244|PubMed:19690332, ECO:0000244|PubMed:20068231, ECO:0000244|PubMed:21406692, ECO:0000244|PubMed:24275569}; propagated from UniProtKB/Swiss-Prot (O43583.2)][putative rRNA binding site [nu…				1	NP_003668.2	114	NP_003668.2	density-regulated protein [Homo sapiens]	0	0	0	0	0	0	0	0	0	0	0	0	0	0	0	0	0	0	0	0.00062708	0	0.00173281	0	0	0	0
57	o	29	0.033	Q	0	RPL5		1		[1..295][31..171][192..283]	[PTZ00069][Ribosomal_L18_L5e][Ribosomal_L18_c]	[60S ribosomal protein L5; Provisional][Ribosomal L18/L5e: L18 (L5e) is a ribosomal protein found in the central protuberance (CP) of the large subunit. L18 binds 5S rRNA and induces a conformational change that stimulates the binding of L5 to 5S rRNA. Association of 5S rRNA with 23S rRNA...; cd00432][Ribosomal L18 C-terminal region; pfam14204]	[2][5][order(31,34..35,146,149,167)][31][order(33,35..36,38,50,54..59,61,63,72..74,77,145,158)][order(33,36..37)][48][151][272]	[acetylation][acetylation][other][other][other][other][acetylation][other][phosphorylation]	[N-acetylglycine; propagated from UniProtKB/Swiss-Prot (P46777.3)][N6-acetyllysine; propagated from UniProtKB/Swiss-Prot (P46777.3)][23S rRNA interface [nucleotide binding]][L21e interface [polypeptide binding]][5S rRNA interface [nucleotide binding]][L27 interface [polypeptide binding]][N6-acetyllysine; propagated from UniProtKB/Swiss-Prot (P46777.3)][L5 interface [polypeptide binding]][Phosphos…				1	NP_000960.2	115	NP_000960.2	60S ribosomal protein L5 [Homo sapiens]	0	0	0	0	0	0	0	0	0	0	0	0.0134477	0	0	0	0	0	0	0	0	0	0	0	0	0	0
58	o	7	0.056	Q	0	PTPN9		15	3.1.3.48	[20..68][94..238][302..573][329..573][515..521]	[CRAL_TRIO_N][SEC14][PTPc][PTPc][Substrate binding (By similarity)]	[CRAL/TRIO, N-terminal domain; smart01100][Sec14p-like lipid-binding domain. Found in secretory proteins, such as S. cerevisiae phosphatidylinositol transfer protein (Sec14p), and in lipid regulated proteins such as RhoGAPs, RhoGEFs and neurofibromin (NF1). SEC14 domain of Dbl is known to...; cd00170][Protein tyrosine phosphatase, catalytic domain; smart00194][Protein tyrosine phosphatases (PTP) …	[1][order(108,110,112,138,153,155,172,176,180,183,186,188,195,][order(181,213)][order(470,514..515,518,521..522)]	[acetylation][other][other][active]	[N-acetylmethionine; propagated from UniProtKB/Swiss-Prot (P43378.1)][phospholipid binding pocket [chemical binding]][salt bridge][]				1	NP_002824.1	117	NP_002824.1	tyrosine-protein phosphatase non-receptor type 9 [Homo sapiens]	0	0	0	0	0	0	0	0	0	0.00037126	0	0	0	0	0	0	0	0	0	0	0	0	0	0	0	0
59						CORO1C		12		[56..120][128..353][309..443]	[DUF1899][WD40][DUF1900]	[Domain of unknown function (DUF1899); pfam08953][WD40 domain, found in a number of eukaryotic proteins that cover a wide variety of functions including adaptor/regulatory modules in signal transduction, pre-mRNA processing and cytoskeleton assembly; typically contains a GH dipeptide 11-24 residues from...; cl02567][Domain of unknown function (DUF1900); pfam08954]	[order(131..132,151,155,161..162,181..182,200,205,211..212,]	[other]	[structural tetrad]				2	NP_001098707.1;NP_055140.1	118	NP_001098707.1	0 genes:. 2 proteins in this group did not match any genes. NP_001098707.1:coronin-1C isoform a [Homo sapiens] ;NP_055140.1:coronin-1C isoform b [Homo sapiens] ;	0	0	0	0	0	0	0	0	0	0	0	0	0	0	0	0	0	0	0	0.0003534	0.00045865	0.00021701	0	0	0	0
60						TGM6		20	2.3.2.13	[5..121][268..359][495..600]	[Transglut_N][TGc][Transglut_C]	[Transglutaminase family; pfam00868][Transglutaminase/protease-like homologues; smart00460][Transglutaminase family, C-terminal ig like domain; pfam00927]							2	NP_001241663.1;NP_945345.2	119	NP_001241663.1	0 genes:. 2 proteins in this group did not match any genes. NP_001241663.1:protein-glutamine gamma-glutamyltransferase 6 isoform 2 [Homo sapiens] ;NP_945345.2:protein-glutamine gamma-glutamyltransferase 6 isoform 1 [Homo sapiens] ;	0	0	0.064205	0	0	0	0	0	0	0	0	0	0	0	0	0	0	0	0	0	0	0	0	0	0	0
61						ISCA2		14		[7..153]	[Fe-S_biosyn]	[Iron-sulphur cluster biosynthesis; cl00400]							1	NP_919255.2	120	NP_919255.2	iron-sulfur cluster assembly 2 homolog, mitochondrial isoform 1 precursor [Homo sapiens]	0	0	0	0	0	0	0	0	0	0	0	0	0	0	0	0	0	0	0	0	0	0.00037132	0	0	0	0
62	o	30	0.422	S	26	SQRDL		15		[56..398][67..207]	[FadH2][NADB_Rossmann]	[NADPH-dependent 2,4-dienoyl-CoA reductase, sulfur reductase, or a related oxidoreductase [Lipid transport and metabolism]; COG0446][Rossmann-fold NAD(P)(+)-binding proteins; cl21454]	[173][343]	[acetylation][phosphorylation]	[N6-acetyllysine. {ECO:0000250|UniProtKB:Q9R112}; propagated from UniProtKB/Swiss-Prot (Q9Y6N5.1)][Phosphoserine. {ECO:0000250|UniProtKB:Q9R112}; propagated from UniProtKB/Swiss-Prot (Q9Y6N5.1)]				1	NP_067022.1	121	NP_067022.1	sulfide:quinone oxidoreductase, mitochondrial [Homo sapiens]	0	0	0	0	0	0.000487	0	0	0.00373217	0.00097848	0	0	0	0.00277238	0	0	0	0	0	0	0	0	0	0	0	0
63	o	12	0.032	Q	0	EEF2		19		[1..858][20..233][394..487][503..565][574..746][742..821]	[PTZ00416][EF2][eEF2_snRNP_like_II][EFG_II][aeEF2_snRNP_like_IV][eEF2_snRNP_like_C]	[elongation factor 2; Provisional][Elongation Factor 2 (EF2) in archaea and eukarya; cd01885][EF2_snRNP_like_II: this subfamily represents domain II of elongation factor (EF) EF-2 found eukaryotes and archaea and, the C-terminal portion of the spliceosomal human 116kD U5 small nuclear ribonucleoprotein (snRNP) protein (U5-116 kD) and, its yeast...; cd03700][Elongation Factor G, domain II; pfam144…	[26..33][order(27,29,33..34,37,40..41,73..74,108..109,132..133,176,][order(29..34,158..159,161,216..218)][54..73][54][57][57][57][57][57][57][59][59][59][59][69][104..107][106..124][152][158..161][216..218][235][239][265][272][272][275][373][373][435][435][439][445][502][502][525][567][572][586..587][595][605..606][619][715][715]	[other][other][other][other][phosphorylation][phosphorylation][phosphorylation][phosphorylation][modified][modified][phosphorylation][phosphorylation][phosphorylation][modified][phosphorylation][other][other][other][modified][other][other][acetylation][acetylation][phosphorylation][acetylation][modified][acetylation][phosphorylation][phosphorylation][phosphorylation][phosphorylation][acetylation]…	[G1 box][putative GEF interaction site [polypeptide binding]][GTP/Mg2+ binding site [chemical binding]][Switch I region][Phosphothreonine. {ECO:0000269|PubMed:21406692}; propagated from UniProtKB/Swiss-Prot (P13639.4)][][][][dephosphorylation site][dephosphorylation site][Phosphothreonine, by EEF2K. {ECO:0000269|PubMed:20068231, ECO:0000269|PubMed:21406692, ECO:0000269|PubMed:23184662}; propagate…				1	NP_001952.1	123	NP_001952.1	elongation factor 2 [Homo sapiens]	0.00065766	0	0	0	0	0	0	0	0	0	0	0.01127	0	0	0	0	0	0	0	0.00021707	0	0	0	0	0	0
64	o	22	0.067	Q	22	RPS16		19		[6..146]	[PLN00210]	[40S ribosomal protein S16; Provisional]							2	NP_001011.1;NP_001308040.1	127	NP_001011.1	0 genes:. 2 proteins in this group did not match any genes. NP_001011.1:40S ribosomal protein S16 isoform 1 [Homo sapiens] ;NP_001308040.1:40S ribosomal protein S16 isoform 2 [Homo sapiens] ;	0.0012883	0	0	0	0	0	0	0	0	0	0	0	0	0	0	0	0	0	0	0	0	0	0	0	0	0
65						CXorf56		X											3	NP_001164040.1;NP_001164041.1;NP_071384.1	129	NP_001164040.1	0 genes:. 3 proteins in this group did not match any genes. NP_001164040.1:UPF0428 protein CXorf56 isoform 2 [Homo sapiens] ;NP_001164041.1:UPF0428 protein CXorf56 isoform 3 [Homo sapiens] ;NP_071384.1:UPF0428 protein CXorf56 isoform 1 [Homo sapiens] ;	0	0	0	0	0	0	0	0	0	0	0	0	0	0	0	0	0	0	0	0.00143539	0	0.00066107	0.00017789	0	0	0
66	o	3	0.123	Q	18	TIMM8A		X		[23..83][43..66]	[zf-Tim10_DDP][Twin CX3C motif]	[Tim10/DDP family zinc finger; pfam02953][propagated from UniProtKB/Swiss-Prot (O60220.1)]	[94][96]	[phosphorylation][phosphorylation]	[Phosphoserine; propagated from UniProtKB/Swiss-Prot (O60220.1)][Phosphoserine; propagated from UniProtKB/Swiss-Prot (O60220.1)]				1	NP_004076.1	130	NP_004076.1	mitochondrial import inner membrane translocase subunit Tim8 A isoform 1 [Homo sapiens]	0	0	0	0	0	0	0	0	0	0	0	0	0	0	0	0	0	0	0	0.00448005	0.0124593	0.00117903	0.00348992	0.00430442	0.0111947	0
67	o	27	0.059	Q	23	AHNAK		11		[22..90][3520..4564][<4726..5622][4971..4979][5019..5027][5034..5039][5706..5716][5772..5779]	[PDZ][TamB][TamB][Nuclear localization signal (Potential)][Nuclear localization signal (Potential)][Nuclear localization signal (Potential)][Nuclear localization signal (Potential)][Nuclear localization signal (Potential)]	[PDZ domain, also called DHR (Dlg homologous region) or GLGF (after a conserved sequence motif). Many PDZ domains bind C-terminal polypeptides, though binding to internal (non-C-terminal) polypeptides and even to lipids has been demonstrated; cl00117][Autotransporter translocation and assembly factor TamB [Intracellular trafficking, secretion, and vesicular transport]; COG2911][Autotransporter tr…	[1][order(22..23,25,71,74..75)][41][41][93][93][101][101][135][177][210][212][216][490][490][511][511][559][559][570][570][572][793][1068][1192][1286][1986][2181][2309][2397][2670][2798][2832][2845][3054][3409][3412][3426][3716][3836][4092][4100][4220][4430][4516][4684][4766][4812][4903][4960][4986][4993][5009][5077][5099][5110][5110][5125][5332][5386][5400][5415][5448][5448][5552][5620][5731][57…	[acetylation][other][phosphorylation][phosphorylation][phosphorylation][phosphorylation][phosphorylation][phosphorylation][phosphorylation][phosphorylation][phosphorylation][phosphorylation][phosphorylation][phosphorylation][phosphorylation][phosphorylation][phosphorylation][phosphorylation][phosphorylation][phosphorylation][phosphorylation][phosphorylation][phosphorylation][phosphorylation][phos…	[N-acetylmethionine; propagated from UniProtKB/Swiss-Prot (Q09666.2)][protein binding site [polypeptide binding]][][Phosphoserine; propagated from UniProtKB/Swiss-Prot (Q09666.2)][][Phosphoserine; propagated from UniProtKB/Swiss-Prot (Q09666.2)][][Phosphothreonine; propagated from UniProtKB/Swiss-Prot (Q09666.2)][Phosphoserine; propagated from UniProtKB/Swiss-Prot (Q09666.2)][Phosphoserine; propa…				1	NP_001611.1	132	NP_001611.1	neuroblast differentiation-associated protein AHNAK isoform 1 [Homo sapiens]	0	0	0	0	0	0	0.0237499	0	0	0	0	0	0	0	0	0	0	0	0	0	0	0	0	0	0	0
68	o	20	0.026	Q	0	INIP		9					[2]	[acetylation]	[N-acetylalanine. {ECO:0000244|PubMed:19413330}; propagated from UniProtKB/Swiss-Prot (Q9NRY2.1)]				1	NP_067041.1	133	NP_067041.1	SOSS complex subunit C [Homo sapiens]	0	0	0	0	0	0	0	0	0	0	0	0	0	0	0	0	0	0	0	0	0	0.00054983	0	0	0	0
69						HMGN3		6		[3..80]	[HMG14_17]	[HMG14 and HMG17; pfam01101]							2	NP_001305814.1;NP_004233.1	134	NP_001305814.1	0 genes:. 2 proteins in this group did not match any genes. NP_001305814.1:high mobility group nucleosome-binding domain-containing protein 3 isoform f [Homo sapiens] ;NP_004233.1:high mobility group nucleosome-binding domain-containing protein 3 isoform a [Homo sapiens] ;	0	0	0	0	0	0	0	0	0	0	0	0	0	0	0	0	0	0	0	0	0.00294768	0.00069735	0	0	0	0
70	o	27	0.034	Q	0	TPT1		13		[1..168]	[TCTP]	[Translationally controlled tumor protein; pfam00838]	[46][53][64]	[phosphorylation][phosphorylation][phosphorylation]	[Phosphoserine, by PLK1; propagated from UniProtKB/Swiss-Prot (P13693.1)][Phosphoserine; propagated from UniProtKB/Swiss-Prot (P13693.1)][Phosphoserine, by PLK1; propagated from UniProtKB/Swiss-Prot (P13693.1)]				2	NP_001273201.1;NP_003286.1	136	NP_001273201.1	0 genes:. 2 proteins in this group did not match any genes. NP_001273201.1:translationally-controlled tumor protein isoform 1 [Homo sapiens] ;NP_003286.1:translationally-controlled tumor protein isoform 2 [Homo sapiens] ;	0	0	0	0	0	0	0	0	0	0	0	0	0	0	0	0	0	0	0	0	0	0.00058054	0	0	0	0
71	o	4	0.215	Q	26	PABPC1L		20		[11..601][12..91][97..172][190..269][293..370][530..600]	[PABP-1234][RRM1_I_PABPs][RRM2_I_PABPs][RRM3_I_PABPs][RRM4_I_PABPs][PABP]	[polyadenylate binding protein, human types 1, 2, 3, 4 family; TIGR01628][RNA recognition motif 1 in type I polyadenylate-binding proteins; cd12378][RNA recognition motif 2 found in type I polyadenylate-binding proteins; cd12379][RNA recognition motif 3 found in type I polyadenylate-binding proteins; cd12380][RNA recognition motif 4 in type I polyadenylate-binding proteins; cd12381][Poly-adenylat…	[order(12,14,24,41..42,44..46,49,52,54,56,58,83,85..89)][order(23..25,28,40,44,46..50,89,91)][order(100,102,104..105,127,138..140,142,144,169,172)]	[other][other][other]	[RNA binding site [nucleotide binding]][oligomer interface [polypeptide binding]][RNA binding site [nucleotide binding]]				1	NP_001118228.1	137	NP_001118228.1	polyadenylate-binding protein 1-like [Homo sapiens]	0	0	0	0	0	0	0	0	0	0	0	0.00051354	0	0	0	0	0	0	0	0	0	0	0	0	0	0
72						API5		11		[23..439]	[API5]	[Apoptosis inhibitory protein 5 (API5); pfam05918]							3	NP_001136403.1;NP_001230676.1;NP_006586.1	138	NP_001136403.1	0 genes:. 3 proteins in this group did not match any genes. NP_001136403.1:apoptosis inhibitor 5 isoform c [Homo sapiens] ;NP_001230676.1:apoptosis inhibitor 5 isoform d [Homo sapiens] ;NP_006586.1:apoptosis inhibitor 5 isoform b [Homo sapiens] ;	0	0	0	0	0	0.000487	0	0	0	0	0	0	0	0	0	0	0	0	0	0.00027591	0	0	0	0	0	0
73	o	18	0.818	S	18	GRN		17		[62..112][128..178][210..260][285..335][377..415][445..495][522..572]	[GRAN][GRAN][GRAN][GRAN][Granulin][GRAN][GRAN]	[Granulin; smart00277][Granulin; smart00277][Granulin; smart00277][Granulin; smart00277][Granulin; pfam00396][Granulin; smart00277][Granulin; smart00277]							1	NP_002078.1	140	NP_002078.1	granulins precursor [Homo sapiens]	0	0	0	0	0	0	0	0	0	0	0	0	0	0	0	0	0	0	0	0.00020938	0.00122282	0.00077144	0.00057086	0.00211229	0	0
74						NOLC1		10		[68..82][394..597][611..627][633..706]	[Nuclear localization signal (Potential)][Nuclear localization signal (Potential)][Nuclear localization signal (Potential)][SRP40_C]	[propagated from UniProtKB/Swiss-Prot (Q14978.2)][propagated from UniProtKB/Swiss-Prot (Q14978.2)][propagated from UniProtKB/Swiss-Prot (Q14978.2)][SRP40, C-terminal domain; pfam05022]	[33][87][90][91][376][407][425][518][548][573][590][592][617][620][632][653][673][696][708]	[acetylation][phosphorylation][phosphorylation][phosphorylation][phosphorylation][phosphorylation][acetylation][phosphorylation][phosphorylation][phosphorylation][phosphorylation][phosphorylation][phosphorylation][phosphorylation][phosphorylation][phosphorylation][acetylation][phosphorylation][phosphorylation]	[N6-acetyllysine; propagated from UniProtKB/Swiss-Prot (Q14978.2)][Phosphoserine; propagated from UniProtKB/Swiss-Prot (Q14978.2)][Phosphoserine; propagated from UniProtKB/Swiss-Prot (Q14978.2)][Phosphoserine; propagated from UniProtKB/Swiss-Prot (Q14978.2)][Phosphoserine; propagated from UniProtKB/Swiss-Prot (Q14978.2)][Phosphoserine; propagated from UniProtKB/Swiss-Prot (Q14978.2)][N6-acetyllys…				1	NP_001271317.1	142	NP_001271317.1	nucleolar and coiled-body phosphoprotein 1 isoform 1 [Homo sapiens]	0	0	0	0	0	0	0	0	0	0	0	0	0	0	0	0	0	0.00541365	0	0	0.00034092	0.00104848	0.00137608	0.00088335	0	0
75	i	24	0.036	Q	22	DNAJC19		3		[41..85]	[DnaJ]	[DnaJ domain or J-domain. DnaJ/Hsp40 (heat shock protein 40) proteins are highly conserved and play crucial roles in protein translation, folding, unfolding, translocation, and degradation. They act primarily by stimulating the ATPase activity of Hsp70s; cd06257]							2	NP_001177162.1;NP_660304.1	143	NP_001177162.1	0 genes:. 2 proteins in this group did not match any genes. NP_001177162.1:mitochondrial import inner membrane translocase subunit TIM14 isoform 2 [Homo sapiens] ;NP_660304.1:mitochondrial import inner membrane translocase subunit TIM14 isoform 1 [Homo sapiens] ;	0	0	0	0	0	0.00240825	0	0	0	0	0	0	0	0	0	0	0	0	0	0	0	0	0	0	0	0
76	o	8	0.087	Q	29	KHSRP		19		[146..208][235..300][325..386][426..492][571..684][671..>689]	[KH-I][KH-I][KH-I][KH-I][4 X 12 AA imperfect repeats][DUF1897]	[K homology RNA-binding domain, type I. KH binds single-stranded RNA or DNA. It is found in a wide variety of proteins including ribosomal proteins, transcription factors and post-transcriptional modifiers of mRNA. There are two different KH domains that...; cd00105][K homology RNA-binding domain, type I. KH binds single-stranded RNA or DNA. It is found in a wide variety of proteins including rib…	[2][100][order(154,156..158,160..164,167..168,171..172,177..180)][161..164][181][193][order(243,245..247,249..253,256..257,260..261,266..269)][250..253][274][order(332,334..336,338..342,345..346,349..350,355..358)][339..342][order(434,436..438,440..444,447..448,451..452,457..460)][441..444][480]	[acetylation][phosphorylation][other][other][phosphorylation][phosphorylation][other][other][phosphorylation][other][other][other][other][phosphorylation]	[N-acetylserine; propagated from UniProtKB/Swiss-Prot (Q92945.4)][Phosphothreonine; propagated from UniProtKB/Swiss-Prot (Q92945.4)][nucleic acid binding region [nucleotide binding]][G-X-X-G motif][Phosphoserine; propagated from UniProtKB/Swiss-Prot (Q92945.4)][Phosphoserine; propagated from UniProtKB/Swiss-Prot (Q92945.4)][nucleic acid binding region [nucleotide binding]][G-X-X-G motif][Phosphos…				1	NP_003676.2	144	NP_003676.2	far upstream element-binding protein 2 [Homo sapiens]	0	0	0	0	0	0	0	0	0	0	0	0	0	0	0	0.00177084	0	0	0.00332324	0.00176812	0.00033996	0.00041362	0.00012985	0	0	0
77	o	14	0.033	Q	14	MORN4		10		[16..38][16..35][39..61][39..61][62..84][85..107]	[MORN 1][MORN][MORN][MORN 2][MORN 3][MORN 4]	[propagated from UniProtKB/Swiss-Prot (Q8NDC4.1)][Possible plasma membrane-binding motif in junctophilins, PIP-5-kinases and protein kinases; smart00698][MORN repeat; pfam02493][propagated from UniProtKB/Swiss-Prot (Q8NDC4.1)][propagated from UniProtKB/Swiss-Prot (Q8NDC4.1)][propagated from UniProtKB/Swiss-Prot (Q8NDC4.1)]							1	NP_849154.1	145	NP_849154.1	MORN repeat-containing protein 4 [Homo sapiens]	0	0	0	0	0	0	0	0	0	0	0	0	0	0	0	0	0	0	0	0	0	0	0	0.00285979	0	0
78	o	15	0.341	Q	15	ACAT1		11	2.3.1.9	[40..427][43..426][258..260]	[PLN02644][thiolase][Coenzyme A binding]	[acetyl-CoA C-acetyltransferase][Thiolase are ubiquitous enzymes that catalyze the reversible thiolytic cleavage of 3-ketoacyl-CoA into acyl-CoA and acetyl-CoA, a 2-step reaction involving a covalent intermediate formed with a catalytic cysteine. They are found in prokaryotes and...; cd00751][propagated from UniProtKB/Swiss-Prot (P24752.1)]	[order(61,88,102,105,109,120..123,131,138..139,142,157,315,][66][66][78][order(126,385,413)][174][174][181][181][190][190][202][202][223][223][230][230][243][251][257][263][263][266][268][273][338]	[other][acetylation][modified][modified][active][acetylation][modified][acetylation][modified][acetylation][modified][acetylation][modified][acetylation][modified][acetylation][modified][modified][acetylation][acetylation][acetylation][modified][modified][modified][acetylation][acetylation]	[dimer interface [polypeptide binding]][N6-acetyllysine, alternate. {ECO:0000250|UniProtKB:Q8QZT1}; propagated from UniProtKB/Swiss-Prot (P24752.1)][N6-succinyllysine, alternate. {ECO:0000250|UniProtKB:Q8QZT1}; propagated from UniProtKB/Swiss-Prot (P24752.1)][N6-succinyllysine. {ECO:0000250|UniProtKB:Q8QZT1}; propagated from UniProtKB/Swiss-Prot (P24752.1)][][N6-acetyllysine, alternate. {ECO:0000…				1	NP_000010.1	148	NP_000010.1	acetyl-CoA acetyltransferase, mitochondrial precursor [Homo sapiens]	0	0	0	0	0	0	0	0	0	0	0	0	0	0	0	0	0	0	0	0	0.00226426	0	0	0	0	0
79	i	8	0.015	Q	0	TMA7		3		[2..64]	[TMA7]	[Translation machinery associated TMA7; pfam09072]							1	NP_057017.1	150	NP_057017.1	translation machinery-associated protein 7 [Homo sapiens]	0	0	0	0	0	0	0	0	0	0	0	0	0	0	0	0	0	0	0	0	0	0.00268044	0.00528941	0	0	0
80	o	6	0.11	Q	0	PDZD11		X		[45..125]	[PDZ_signaling]	[PDZ domain found in a variety of Eumetazoan signaling molecules, often in tandem arrangements. May be responsible for specific protein-protein interactions, as most PDZ domains bind C-terminal polypeptides, and binding to internal (non-C-terminal)...; cd00992]	[10][18][order(57..60,62,110..111,114..115)]	[phosphorylation][phosphorylation][other]	[][][protein binding site [polypeptide binding]]				1	NP_057568.1	152	NP_057568.1	PDZ domain-containing protein 11 [Homo sapiens]	0	0	0	0	0	0	0	0	0	0	0	0	0	0	0	0	0	0	0	0	0	0	0.00021982	0	0	0
81						LSM14A		19		[4..77][290..400][361..377][380..400]	[LSm14_N][FDF][FFD box][TFG box]	[Like-Sm protein 14, N-terminal domain; cd01736][FDF domain; pfam09532][propagated from UniProtKB/Swiss-Prot (Q8ND56.3)][propagated from UniProtKB/Swiss-Prot (Q8ND56.3)]	[2][order(12..18,20..32,35..39)][order(30,32,68)][64..75][182][183][192][194][216]	[acetylation][other][other][other][phosphorylation][phosphorylation][phosphorylation][phosphorylation][phosphorylation]	[N-acetylserine. {ECO:0000244|PubMed:19413330, ECO:0000244|PubMed:22223895}; propagated from UniProtKB/Swiss-Prot (Q8ND56.3)][Sm1 motif][putative RNA binding site [nucleotide binding]][Sm2 motif][Phosphoserine. {ECO:0000244|PubMed:18669648}; propagated from UniProtKB/Swiss-Prot (Q8ND56.3)][Phosphoserine. {ECO:0000244|PubMed:18669648, ECO:0000244|PubMed:20068231}; propagated from UniProtKB/Swiss-P…				2	NP_001107565.1;NP_056393.2	153	NP_001107565.1	0 genes:. 2 proteins in this group did not match any genes. NP_001107565.1:protein LSM14 homolog A isoform a [Homo sapiens] ;NP_056393.2:protein LSM14 homolog A isoform b [Homo sapiens] ;	0	0	0	0	0	0	0	0	0	0	0	0	0	0	0	0	0	0	0	0.00026817	0	0	0	0	0	0
82	o	23	0.345	Q	21	RAB7A		3		[9..179][10..175][37..45]	[Rab7][Ras][Effector region (By similarity)]	[Rab GTPase family 7 (Rab7); cd01862][Ras family; pfam00071][propagated from UniProtKB/Swiss-Prot (P51149.1)]	[9..10][15..22][order(17..23,33,35,40,66,125..126,128,155..157)][order(17,42,44..45,63,67,69..72,75..76,79)][order(23..34,36..39)][order(33,38..46)][order(38,42..49,56,58)][40][order(41,43..45,60,62,69..70,73,77,79..82,173)][41..45][58..62][63..66][order(66,68..78)][69..74][72][77..81][86..91][117..122][125..128][155..157][171..179][183][205][207]	[other][other][other][other][other][other][other][other][other][other][other][other][other][other][phosphorylation][other][other][other][other][other][other][phosphorylation][modified][modified]	[Rab subfamily motif 1 (RabSF1)][G1 box][GTP/Mg2+ binding site [chemical binding]][GDI interaction site][Rab subfamily motif 2 (RabSF2)][Switch I region][putative GEF interaction site [polypeptide binding]][G2 box][putative effector interaction site][Rab family motif 1 (RabF1)][Rab family motif 2 (RabF2)][G3 box][Switch II region][Rab family motif 3 (RabF3)][Phosphoserine; propagated from UniProt…				1	NP_004628.4	155	NP_004628.4	ras-related protein Rab-7a [Homo sapiens]	0	0	0	0	0	0.00211739	0	0.00545322	0	0.00319068	0	0	0	0	0	0	0	0	0	0.00059981	0	0	0	0	0	0
83	i	23	0.047	Q	30	ELOF1		19		[19..80]	[Elf1]	[Transcription elongation factor Elf1 like; pfam05129]							1	NP_115753.1	156	NP_115753.1	transcription elongation factor 1 homolog [Homo sapiens]	0	0	0	0	0	0	0	0	0	0	0	0	0	0	0	0	0	0	0	0	0	0	0.00259546	0	0.013083	0
84	o691-713i	29	0.717	S	29	DSC3		18		[27..111][140..234][247..351][360..464][477..573][<596..669][780..896]	[Cadherin_pro][Cadherin][Cadherin_repeat][Cadherin_repeat][Cadherin_repeat][CA_like][Cadherin_C]	[Cadherin prodomain like; smart01055][Cadherin domain; pfam00028][Cadherin tandem repeat domain; cd11304][Cadherin tandem repeat domain; cd11304][Cadherin tandem repeat domain; cd11304][Cadherin repeat-like domain; cl15786][Cadherin cytoplasmic region; pfam01049]	[93][order(146..147,202,204,235,237..238)][order(254..255,312,314,347,349..350)][order(366..367,424,426,464)][order(482..483,534,536,569,571..572)][691..711]	[phosphorylation][other][other][other][other][transmembrane region]	[][Ca2+ binding site [ion binding]][Ca2+ binding site [ion binding]][Ca2+ binding site [ion binding]][Ca2+ binding site [ion binding]][propagated from UniProtKB/Swiss-Prot (Q14574.3)]				2	NP_001932.2;NP_077741.2	157	NP_001932.2	0 genes:. 2 proteins in this group did not match any genes. NP_001932.2:desmocollin-3 isoform Dsc3a preproprotein [Homo sapiens] ;NP_077741.2:desmocollin-3 isoform Dsc3b preproprotein [Homo sapiens] ;	0	0	0	0	0	0	0	0	0	0	0	0	0	0	0	0	0	0	0	6.929e-05	0	0	0	0	0	0
85	o	21	0.109	Q	27	PHF14		7		[321..377][385..498][727..776]	[PHD1_PHF14][ePHD_PHF14][PHD2_PHF14]	[PHD finger 1 found in PHD finger protein 14 (PHF14) and similar proteins; cd15561][Extended PHD finger found in PHD finger protein 14 (PHF14) and similar proteins; cd15674][PHD finger 2 found in PHD finger protein 14 (PHF14) and similar proteins; cd15562]	[16][23][26][26][29][29][84][91][196][208][217][287][287][290][290][294][298][298][302][302][order(321,335..339,343,372)][order(322,325,339,342,347,350,374,377)][order(385,388,405,408,441,444,458,463,468,471,495,498)][order(440,454..458,464,493)][530][553][order(727,739..743,747,771)][order(728,731,743,746,751,754,773,776)][835]	[phosphorylation][phosphorylation][phosphorylation][phosphorylation][phosphorylation][phosphorylation][phosphorylation][phosphorylation][phosphorylation][phosphorylation][phosphorylation][phosphorylation][phosphorylation][phosphorylation][phosphorylation][phosphorylation][phosphorylation][phosphorylation][phosphorylation][phosphorylation][other][other][other][other][phosphorylation][phosphorylati…	[][][][Phosphoserine; propagated from UniProtKB/Swiss-Prot (O94880.2)][][Phosphoserine; propagated from UniProtKB/Swiss-Prot (O94880.2)][Phosphoserine; propagated from UniProtKB/Swiss-Prot (O94880.2)][Phosphoserine; propagated from UniProtKB/Swiss-Prot (O94880.2)][Phosphoserine; propagated from UniProtKB/Swiss-Prot (O94880.2)][Phosphoserine; propagated from UniProtKB/Swiss-Prot (O94880.2)][][][Ph…				1	NP_055475.2	158	NP_055475.2	PHD finger protein 14 [Homo sapiens]	0	0	0	0	0	0	0	0	0	0	0	0	0	0	0	0	0	0	0	0	0	6.439e-05	0	0	0	0
87	o	35	0.013	Q	0	GPATCH1		19		[29..117][154..>178][403..>486]	[DUF1604][G-patch][DAGK_cat]	[Protein of unknown function (DUF1604); pfam07713][G-patch domain; pfam01585][Diacylglycerol kinase catalytic domain; cl01255]	[2][6][8]	[acetylation][phosphorylation][phosphorylation]	[N-acetylalanine. {ECO:0000244|PubMed:20068231, ECO:0000244|PubMed:21406692}; propagated from UniProtKB/Swiss-Prot (Q9BRR8.1)][Phosphoserine. {ECO:0000244|PubMed:20068231, ECO:0000244|PubMed:21406692}; propagated from UniProtKB/Swiss-Prot (Q9BRR8.1)][Phosphoserine. {ECO:0000244|PubMed:20068231, ECO:0000244|PubMed:21406692}; propagated from UniProtKB/Swiss-Prot (Q9BRR8.1)]				1	NP_060495.2	164	NP_060495.2	G patch domain-containing protein 1 [Homo sapiens]	0	0	0	0	0	0	0	0	0	0	0	0	0	0	0	0	0	0	0	0.00026673	0	0	0	0	0	0
88	i7-29o	33	0.825	S	33	COMT		22	2.1.1.6	[112..217][167..170]	[AdoMet_MTases][S-adenosyl-L-methionine binding]	[S-adenosylmethionine-dependent methyltransferases (SAM or AdoMet-MTase), class I; AdoMet-MTases are enzymes that use S-adenosyl-L-methionine (SAM or AdoMet) as a substrate for methyltransfer, creating the product S-adenosyl-L-homocysteine (AdoHcy); cd02440][propagated from UniProtKB/Swiss-Prot (P21964.2)]	[7..26][order(115..121,140..141,167..169,186)][267]	[transmembrane region][other][phosphorylation]	[propagated from UniProtKB/Swiss-Prot (P21964.2)][S-adenosylmethionine binding site [chemical binding]][Phosphoserine. {ECO:0000250|UniProtKB:P22734}; propagated from UniProtKB/Swiss-Prot (P21964.2)]				2	NP_001128634.1;NP_009294.1	166	NP_001128634.1	0 genes:. 2 proteins in this group did not match any genes. NP_001128634.1:catechol O-methyltransferase isoform MB-COMT [Homo sapiens] ;NP_009294.1:catechol O-methyltransferase isoform S-COMT [Homo sapiens] ;	0	0	0	0	0	0.00161735	0	0.00119011	0	0	0	0	0	0	0	0	0	0	0	0	0	0	0	0	0	0
89	o	5	0.02	Q	0	SNRPD2		19		[24..113]	[Sm_D2]	[Sm protein D2; cd01720]	[2][12][order(25,28..29,47..49,61..62,64,102,104)][order(31,39,45..49,56..57,60..64,68..69,72..73,92..94,96,][order(42..48,50..62,64..68)][98..109]	[acetylation][phosphorylation][other][other][other][other]	[N-acetylserine. {ECO:0000244|PubMed:22814378, ECO:0000244|PubMed:25944712, ECO:0000269|Ref.6}; propagated from UniProtKB/Swiss-Prot (P62316.1)][Phosphothreonine. {ECO:0000244|PubMed:20068231}; propagated from UniProtKB/Swiss-Prot (P62316.1)][RNA binding site [nucleotide binding]][heptamer interface [polypeptide binding]][Sm1 motif][Sm2 motif]				2	NP_004588.1;NP_808210.2	167	NP_004588.1	0 genes:. 2 proteins in this group did not match any genes. NP_004588.1:small nuclear ribonucleoprotein Sm D2 isoform 1 [Homo sapiens] ;NP_808210.2:small nuclear ribonucleoprotein Sm D2 isoform 2 [Homo sapiens] ;	0	0	0	0	0	0	0	0	0	0	0	0	0	0	0	0	0	0	0	0	0.00204839	0	0	0	0	0
90	o4421-4443i	21	0.798	S	21	LRP1		12		[27..60][72..104][119..148][158..188][275..314][292..334][316..358][335..378][361..401][379..422][486..519][551..593][571..613][594..633][614..659][640..689][660..710][<700..733][711..754][807..842][854..886][895..928][936..967][978..1011][1015..1048][1062..1097][1104..1140][1145..1178][1185..1221][1309..1355][1336..1376][1356..1398][1380..1423][1399..1445][1424..1468][1446..1490][1491..1531][154…	[LDLa][LDLa][FXa_inhibition][FXa_inhibition][LY][LDL-receptor class B 1][LY][LDL-receptor class B 2][LY][LDL-receptor class B 3][FXa_inhibition][LY][LDL-receptor class B 4][LY][LDL-receptor class B 5][LY][LDL-receptor class B 6][LY][LDL-receptor class B 7][FXa_inhibition][LDLa][LDLa][LDLa][LDLa][LDLa][LDLa][LDLa][LDLa][FXa_inhibition][LDL-receptor class B 8][LY][LDL-receptor class B 9][LY][LDL-re…	[Low Density Lipoprotein Receptor Class A domain, a cysteine-rich repeat that plays a central role in mammalian cholesterol metabolism; the receptor protein binds LDL and transports it into cells by endocytosis; 7 successive cysteine-rich repeats of about...; cd00112][Low Density Lipoprotein Receptor Class A domain, a cysteine-rich repeat that plays a central role in mammalian cholesterol metabol…	[order(32,41,52..53)][order(45,48,52,58..59)][55..59][order(77,86,97..98)][order(90,93,97,103..104)][100..104][order(859,867,878..879)][order(871,874,878,884..885)][881..885][order(900,908,919..920)][order(912,915,919,925..926)][922..926][order(941,949,960..961)][order(953,956,960,966..967)][963..967][order(982,990,1001..1002)][order(994,997,1001,1007..1008)][1004..1008][order(1020,1028,1039..104…	[other][other][other][other][other][other][other][other][other][other][other][other][other][other][other][other][other][other][other][other][other][other][other][other][other][other][other][other][other][other][acetylation][other][other][other][other][other][other][other][other][other][other][other][other][other][other][other][other][other][other][other][other][other][other][other][other][other][…	[putative binding surface][calcium-binding site [ion binding]][D-X-S-D-E motif][putative binding surface][calcium-binding site [ion binding]][D-X-S-D-E motif][putative binding surface][calcium-binding site [ion binding]][D-X-S-D-E motif][putative binding surface][calcium-binding site [ion binding]][D-X-S-D-E motif][putative binding surface][calcium-binding site [ion binding]][D-X-S-D-E motif][put…				1	NP_002323.2	168	NP_002323.2	prolow-density lipoprotein receptor-related protein 1 preproprotein [Homo sapiens]	0	0	0	0	0	0	0	0	0.0001848	0	0	0	0	0	0	0	0	0	0	0	0	0	0	0	0	0
91						DDX11		12	3.6.4.12	[1..411][201..867][684..841]	[DEXDc2][rad3][HELICc2]	[DEAD-like helicases superfamily; smart00488][DNA repair helicase (rad3); TIGR00604][helicase superfamily c-terminal domain; smart00491]							4	NP_001244074.1;NP_004390.3;NP_085911.2;NP_689651.1	170	NP_001244074.1	0 genes:. 4 proteins in this group did not match any genes. NP_001244074.1:probable ATP-dependent DNA helicase DDX11 isoform 4 [Homo sapiens] ;NP_004390.3:probable ATP-dependent DNA helicase DDX11 isoform 2 [Homo sapiens] ;NP_085911.2:probable ATP-dependent DNA helicase DDX11 isoform 1 [Homo sapiens] ;NP_689651.1:probable ATP-dependent DNA helicase DDX11 isoform 3 [Homo sapiens] ;	0	0	0	0	0	0	0	0	0.00095425	0	0	0	0	0	0	0	0	0	0	0	0	0	0	0	0	0
92						RRM2		2	1.17.4.1	[61][140..415]	[alternative translational start codon; ribonucleotide reductase M2 polypeptide isoform 2][RNRR2]	[][Ribonucleotide Reductase, R2/beta subunit, ferritin-like diiron-binding domain; cd01049]	[order(140,151,158,223..224,227,230..231,234,237,254..255,][order(162,198,229,232,236,324..325,329)][order(198,229,232,292,326,329)][236]	[other][other][other][other]	[dimer interface [polypeptide binding]][putative radical transfer pathway][diiron center [ion binding]][tyrosyl radical]				1	NP_001159403.1	174	NP_001159403.1	ribonucleoside-diphosphate reductase subunit M2 isoform 1 [Homo sapiens]	0	0	0	0	0	0	0	0	0	0	0	0	0	0	0.0124604	0	0	0	0	0	0	0	0	0	0	0
93	o	35	0.021	Q	0	DDX24		14	3.6.4.13	[191..783][192..220][194..511][471..474][563..690]	[SrmB][Q motif][P-loop_NTPase][DEAD box][HELICc]	[Superfamily II DNA and RNA helicase [Replication, recombination and repair]; COG0513][propagated from UniProtKB/Swiss-Prot (Q9GZR7.1)][P-loop containing Nucleoside Triphosphate Hydrolases; cl21455][propagated from UniProtKB/Swiss-Prot (Q9GZR7.1)][Helicase superfamily c-terminal domain; associated with DEXDc-, DEAD-, and DEAH-box proteins, yeast initiation factor 4A, Ski2p, and Hepatitis C virus …	[17][60][71][82][82][82][94][166][192][240..244][285][287][295][295][302][302][306][471..474][order(595..598,618..619,644..646)][order(652,673,677,680)]	[acetylation][phosphorylation][acetylation][phosphorylation][phosphorylation][phosphorylation][phosphorylation][phosphorylation][phosphorylation][other][phosphorylation][phosphorylation][phosphorylation][phosphorylation][phosphorylation][phosphorylation][phosphorylation][other][other][other]	[N6-acetyllysine. {ECO:0000244|PubMed:19608861}; propagated from UniProtKB/Swiss-Prot (Q9GZR7.1)][Phosphoserine. {ECO:0000244|PubMed:24275569}; propagated from UniProtKB/Swiss-Prot (Q9GZR7.1)][N6-acetyllysine. {ECO:0000244|PubMed:19608861}; propagated from UniProtKB/Swiss-Prot (Q9GZR7.1)][][][Phosphoserine. {ECO:0000244|PubMed:16964243, ECO:0000244|PubMed:17081983, ECO:0000244|PubMed:18318008, EC…				1	NP_065147.1	176	NP_065147.1	ATP-dependent RNA helicase DDX24 [Homo sapiens]	0	0	0	0	0	0	0	0.00018773	0	0	0	0	0	0	0	0	0	0	0	0	0	0	0	0	0	0
94	o	3	0.086	Q	30	UXT		X		[18..147]	[Prefoldin_alpha]	[Prefoldin alpha subunit; Prefoldin is a hexameric molecular chaperone complex, found in both eukaryotes and archaea, that binds and stabilizes newly synthesized polypeptides allowing them to fold correctly. The complex contains two alpha and four beta...; cd00584]	[order(67..72,78,80,90,93..94,97,99..101)]	[other]	[prefoldin alpha/beta subunit interface [polypeptide binding]]				2	NP_004173.1;NP_705582.1	177	NP_004173.1	0 genes:. 2 proteins in this group did not match any genes. NP_004173.1:protein UXT isoform 2 [Homo sapiens] ;NP_705582.1:protein UXT isoform 1 [Homo sapiens] ;	0	0	0	0	0	0	0	0	0	0	0	0	0	0	0	0	0	0	0	0	0	0	0.00019602	0	0	0
95	i7-26o	28	0.812	S	28	ELANE		19	3.4.21.37	[29..242][30..245]	[Tryp_SPc][Tryp_SPc]	[Trypsin-like serine protease; smart00020][Trypsin-like serine protease; Many of these are synthesized as inactive precursor zymogens that are cleaved during limited proteolysis to generate their active forms. Alignment contains also inactive enzymes that have substitutions of the catalytic triad...; cd00190]	[30][order(70,117,202)][order(196,217,219)]	[cleavage][active][other]	[][][substrate binding sites [chemical binding]]				1	NP_001963.1	179	NP_001963.1	neutrophil elastase preproprotein [Homo sapiens]	0	0	0	0	0	0	0	0	0	0	0	0	0	0	0	0	0	0	0	0.00023251	0	0	0	0	0	0
96	o	24	0.454	S	21	MSRB2		10		[51..181]	[PRK00222]	[methionine sulfoxide reductase B; Provisional]							1	NP_036360.3	182	NP_036360.3	methionine-R-sulfoxide reductase B2, mitochondrial precursor [Homo sapiens]	0	0	0	0	0	0	0	0	0	0	0	0	0	0	0	0	0	0	0	0	0	0	0.00033818	0	0	0
97						M6PR		12		[1..191]	[Man-6-P_recep]	[Mannose-6-phosphate receptor; pfam02157]							2	NP_001193953.1;NP_002346.1	183	NP_001193953.1	0 genes:. 2 proteins in this group did not match any genes. NP_001193953.1:cation-dependent mannose-6-phosphate receptor isoform 2 precursor [Homo sapiens] ;NP_002346.1:cation-dependent mannose-6-phosphate receptor isoform 1 precursor [Homo sapiens] ;	0	0	0	0	0	0	0	0.00084429	0	0	0	0	0	0	0	0	0	0	0	0	0	0	0	0	0	0
98	o	33	0.025	Q	0	CAT		11	1.11.1.6	[26..490][68..497]	[KatE][catalase_clade_3]	[Catalase [Inorganic ion transport and metabolism]; COG0753][Clade 3 of the heme-binding enzyme catalase; cd08156]	[order(68,73,121..122,141..142,157..161,163,166,172..177,][order(75,114,148,153,161,354,358)][order(151,194,198,201,203,213,235,237,302..305,442,][231][308][386]	[other][other][other][phosphorylation][phosphorylation][phosphorylation]	[tetramer interface [polypeptide binding]][heme binding pocket [chemical binding]][NADPH binding site [chemical binding]][][][]				1	NP_001743.1	185	NP_001743.1	catalase [Homo sapiens]	0.00107073	0	0	0	0	0.00041585	0	0	0	0	0	0	0	0.00118365	0	0	0	0	0	0.0002356	0	0	0	0	0	0
99	o	17	0.226	Q	26	PPP2R2A		8	3.1.3.16	[17..452][39..380]	[CDC55][WD40]	[Serine/threonine protein phosphatase 2A, regulatory subunit [Signal transduction mechanisms]; COG5170][WD40 domain, found in a number of eukaryotic proteins that cover a wide variety of functions including adaptor/regulatory modules in signal transduction, pre-mRNA processing and cytoskeleton assembly; typically contains a GH dipeptide 11-24 residues from...; cl02567]	[order(55,59,65..66,89..90,122,126,132..133,185..186,204,]	[other]	[structural tetrad]				11	NP_001171062.1;NP_001258828.1;NP_001258829.1;NP_001278239.1;NP_002708.1;NP_060931.2;NP_858060.2;NP_858061.2;NP_858062.1;NP_858063.1;NP_858064.1	186	NP_001171062.1	0 genes:. 11 proteins in this group did not match any genes. NP_001171062.1:serine/threonine-protein phosphatase 2A 55 kDa regulatory subunit B alpha isoform isoform 2 [Homo sapiens] ;NP_001258828.1:serine/threonine-protein phosphatase 2A 55 kDa regulatory subunit B beta isoform isoform g [Homo sapiens] ;NP_001258829.1:serine/threonine-protein phosphatase 2A 55 kDa regulatory subunit B beta isofo…	0	0	0	0	0	0	0	0	0	0	0	0.00091995	0	0	0	0	0	0	0	0	0	0	0	0	0	0
100	o	3	0.019	Q	0	KRR1		12		[56..230][158..208]	[Krr1][KH]	[rRNA processing protein Krr1/Pno1, contains KH domain [Translation, ribosomal structure and biogenesis]; COG1094][K homology RNA-binding domain; smart00322]	[2][3][3][order(163,165..169,172..173,176..177,182..185)][166..169]	[acetylation][phosphorylation][phosphorylation][other][other]	[N-acetylalanine. {ECO:0000244|PubMed:19413330, ECO:0000244|PubMed:20068231, ECO:0000244|PubMed:21406692, ECO:0000269|Ref.6}; propagated from UniProtKB/Swiss-Prot (Q13601.4)][][Phosphoserine. {ECO:0000244|PubMed:20068231, ECO:0000244|PubMed:21406692}; propagated from UniProtKB/Swiss-Prot (Q13601.4)][nucleic acid binding region [nucleotide binding]][G-X-X-G motif]				1	NP_008974.5	189	NP_008974.5	KRR1 small subunit processome component homolog [Homo sapiens]	0	0	0	0	0	0	0	0	0	0	0	0	0	0	0	0	0	0	0	0	0	0.00015009	0	0	0	0
101	i98-120o	10	0.094	Q	43	ESYT2		7		[357..477][509..614][758..883]	[C2A_C2C_Synaptotagmin_like][C2B_Synaptotagmin-like][C2C_KIAA1228]	[C2 domain first and third repeat in Synaptotagmin-like proteins; cd08391][C2 domain second repeat present in Synaptotagmin-like proteins; cd04050][C2 domain third repeat present in uncharacterized human KIAA1228-like proteins; cd04030]	[order(385,432,434,439)][725][727][730][733]	[other][phosphorylation][phosphorylation][phosphorylation][phosphorylation]	[Ca2+ binding site [ion binding]][][][][]				1	NP_065779.1	191	NP_065779.1	extended synaptotagmin-2 [Homo sapiens]	0	0	0	0	0	0	0	0	0	0	0	0	0	0	0	0	0	0	0	0	0	6.403e-05	6.892e-05	0	0	0
102	o	17	0.31	Q	17	SNRPD1		18		[1..80][2..93]	[Sufficient for interaction with CLNS1A][Sm_D1]	[propagated from UniProtKB/Swiss-Prot (P62314.1)][Sm protein D1; cd01724]	[order(2,4,35..37,61..63)][order(3,6..7,18..21,30..31,33..36,39,55,57..71,74,79,][order(15..21,23..35,37..41)][57..68][98][100][102][104][106][108][110][112][114]	[other][other][other][other][methylation][methylation][methylation][methylation][methylation][methylation][methylation][methylation][methylation]	[RNA binding site [nucleotide binding]][heptamer interface [polypeptide binding]][Sm1 motif][Sm2 motif][][][][][][][][][]				1	NP_008869.1	195	NP_008869.1	small nuclear ribonucleoprotein Sm D1 isoform 1 [Homo sapiens]	0	0	0	0	0	0	0	0	0	0	0	0	0	0	0	0	0	0	0	0	0	0	0.00025861	0	0	0
103	o	20	0.402	Q	20	TIMM44		19		[65..442]	[3a0801s03tim44]	[mitochondrial import inner membrane, translocase subunit; TIGR00984]	[180][217]	[phosphorylation][modified]	[Phosphoserine. {ECO:0000244|PubMed:21406692}; propagated from UniProtKB/Swiss-Prot (O43615.2)][N6-succinyllysine. {ECO:0000250|UniProtKB:O35857}; propagated from UniProtKB/Swiss-Prot (O43615.2)]				1	NP_006342.2	196	NP_006342.2	mitochondrial import inner membrane translocase subunit TIM44 [Homo sapiens]	0	0	0	0	0	0.00096969	0	0	0	0	0	0	0	0	0	0	0	0	0	0	0	0	0	0	0	0
104	o	28	0.022	Q	0	PDCD5		19		[9..112]	[dsDNA_bind]	[Double-stranded DNA-binding domain; pfam01984]	[2][63][119][119]	[acetylation][acetylation][phosphorylation][phosphorylation]	[N-acetylalanine; propagated from UniProtKB/Swiss-Prot (O14737.3)][N6-acetyllysine; propagated from UniProtKB/Swiss-Prot (O14737.3)][][Phosphoserine; propagated from UniProtKB/Swiss-Prot (O14737.3)]				1	NP_004699.1	197	NP_004699.1	programmed cell death protein 5 [Homo sapiens]	0	0	0	0	0	0	0	0	0	0	0	0	0	0	0	0	0	0	0	0	0	0.00503208	0.00172338	0	0	0
105	i7-26o	24	0.867	S	24	CTSZ		20	3.4.18.1	[62..302]	[Peptidase_C1A_CathepsinX]	[Cathepsin X; the only papain-like lysosomal cysteine peptidase exhibiting carboxymonopeptidase activity. It can also act as a carboxydipeptidase, like cathepsin B, but has been shown to preferentially cleave substrates through a monopeptidyl...; cd02698]	[order(83,92,241,261)][84..88][order(136..137,215,239,242,295)][224]	[active][active][other][glycosylation]	[][active site mini-loop [active]][S2 subsite][]				1	NP_001327.2	199	NP_001327.2	cathepsin Z preproprotein [Homo sapiens]	0	0	0	0	0	0	0	0	0	0	0	0	0	0	0	0	0	0	0	0	0.00159545	0.00037744	0	0	0	0
106	o	8	0.052	Q	43	TTC9		14		[56..89][125..160][130..159][161..194][164..190][165..197]	[TPR 1][TPR 2][TPR repeat][TPR 3][TPR repeat][TPR_1]	[propagated from UniProtKB/Swiss-Prot (Q92623.3)][propagated from UniProtKB/Swiss-Prot (Q92623.3)][TPR repeat [structural motif]][propagated from UniProtKB/Swiss-Prot (Q92623.3)][TPR repeat [structural motif]][Tetratricopeptide repeat; pfam00515]							1	NP_056166.1	200	NP_056166.1	tetratricopeptide repeat protein 9A [Homo sapiens]	0	0	0	0	0	0	0	0	0	0	0	0	0.121455	0	0.0252013	0	0	0	0	0.00055929	0	0	0	0	0	0
107	o	21	0.92	S	21	APOC3		11		[22..91][68..99]	[Apo-CIII][Lipid-binding]	[Apolipoprotein CIII (Apo-CIII); pfam05778][propagated from UniProtKB/Swiss-Prot (P02656.1)]	[94]	[glycosylation]					1	NP_000031.1	201	NP_000031.1	apolipoprotein C-III precursor [Homo sapiens]	0	0	0	0	0	0.00221364	0	0	0	0	0	0	0	0	0	0	0	0	0	0	0	0	0	0	0	0
108	o	31	0.016	Q	0	CHERP		19		[12..61][15..57][211..274][839..889]	[Surp][SURP motif. {ECO:0000255}][VHS_ENTH_ANTH][G_patch]	[Surp module; pfam01805][propagated from UniProtKB/Swiss-Prot (Q8IWX8.3)][VHS, ENTH and ANTH domain superfamily; composed of proteins containing a VHS, ENTH or ANTH domain. The VHS domain is present in Vps27 (Vacuolar Protein Sorting), Hrs (Hepatocyte growth factor-regulated tyrosine kinase substrate) and STAM (Signal...; cl02544][glycine rich nucleic binding domain; smart00443]	[1][18][714][805][806][813][815][817][817][819][819][822][823][828][828][830][837][879][904]	[acetylation][acetylation][phosphorylation][phosphorylation][phosphorylation][phosphorylation][phosphorylation][phosphorylation][phosphorylation][phosphorylation][phosphorylation][phosphorylation][phosphorylation][phosphorylation][phosphorylation][phosphorylation][phosphorylation][acetylation][phosphorylation]	[N-acetylmethionine. {ECO:0000244|PubMed:19413330, ECO:0000244|PubMed:22814378}; propagated from UniProtKB/Swiss-Prot (Q8IWX8.3)][N6-acetyllysine. {ECO:0000244|PubMed:19608861}; propagated from UniProtKB/Swiss-Prot (Q8IWX8.3)][Phosphotyrosine. {ECO:0000250|UniProtKB:Q8CGZ0}; propagated from UniProtKB/Swiss-Prot (Q8IWX8.3)][][][Phosphoserine. {ECO:0000244|PubMed:18669648, ECO:0000244|PubMed:214066…				1	NP_006378.3	202	NP_006378.3	calcium homeostasis endoplasmic reticulum protein [Homo sapiens]	0	0	0	0	0	0	0	0	0	0	0	0	0	0	0	0	0	0	0	0	0	0.00012485	0.00020158	0	0	0
109	o	19	0.87	S	19	LGALS3BP		17		[24..124][261..358]	[SR][BACK]	[Scavenger receptor Cys-rich; smart00202][BTB And C-terminal Kelch; smart00875]	[69]	[glycosylation]					1	NP_005558.1	203	NP_005558.1	galectin-3-binding protein precursor [Homo sapiens]	0	0	0	0	0	0.00074923	0	0.00220526	0	0	0	0	0	0	0	0	0	0	0	0.00010612	0	0	0	0	0	0
110	i	47	0.017	Q	47	ZNF706		8											1	NP_057180.1	204	NP_057180.1	zinc finger protein 706 [Homo sapiens]	0	0	0	0	0	0	0	0	0	0	0	0	0	0	0	0	0	0	0	0	0	0.0007524	0.00080986	0	0	0
111	o	32	0.05	Q	24	ACOX3		4	1.3.3.6	[19..609]	[AXO]	[Peroxisomal acyl-CoA oxidase; cd01150]	[2][order(75..76,80,84,161..166,168,195..196,202..203,231,][order(127,156..159,196..198,253,303,311,431,450..451)][281][451][467]	[acetylation][other][active][phosphorylation][active][other]	[N-acetylalanine. {ECO:0000244|PubMed:22223895, ECO:0000244|PubMed:22814378}; propagated from UniProtKB/Swiss-Prot (O15254.2)][homodimer interface [polypeptide binding]][][Phosphothreonine. {ECO:0000244|PubMed:19369195}; propagated from UniProtKB/Swiss-Prot (O15254.2)][catalytic residue [active]][end of homology with other ACAD's]				2	NP_001095137.1;NP_003492.2	208	NP_001095137.1	0 genes:. 2 proteins in this group did not match any genes. NP_001095137.1:peroxisomal acyl-coenzyme A oxidase 3 isoform b [Homo sapiens] ;NP_003492.2:peroxisomal acyl-coenzyme A oxidase 3 isoform a [Homo sapiens] ;	0	0	0	0	0	0	0	0	0	0	0	0	0	0	0	0	0	0	0	0.00019898	0	0	0	0	0	0
112	o	38	0.058	Q	16	IDH1		2	1.1.1.42	[1..411][94..100]	[PTZ00435][Substrate binding]	[isocitrate dehydrogenase; Provisional][propagated from UniProtKB/Swiss-Prot (O75874.2)]	[2][42][81][126][139][212][224][233][243][321][389][400]	[acetylation][phosphorylation][acetylation][modified][other][other][acetylation][acetylation][acetylation][acetylation][phosphorylation][modified]	[N-acetylserine. {ECO:0000244|PubMed:22814378}; propagated from UniProtKB/Swiss-Prot (O75874.2)][Phosphotyrosine. {ECO:0000244|PubMed:24275569}; propagated from UniProtKB/Swiss-Prot (O75874.2)][N6-acetyllysine. {ECO:0000250|UniProtKB:O88844}; propagated from UniProtKB/Swiss-Prot (O75874.2)][N6-succinyllysine. {ECO:0000250|UniProtKB:O88844}; propagated from UniProtKB/Swiss-Prot (O75874.2)][Critica…				1	NP_005887.2	210	NP_005887.2	isocitrate dehydrogenase [NADP] cytoplasmic [Homo sapiens]	0	0	0	0	0	0	0	0	0	0	0	0.00050775	0	0	0	0	0	0	0	0	0	0	0	0	0	0
113	o	25	0.398	S	25	ALDH2		12	1.2.1.3	[3..516][31..511]	[PLN02466][ALDH_F1AB_F2_RALDH1]	[aldehyde dehydrogenase family 2 member][NAD+-dependent retinal dehydrogenase 1, ALDH families 1A, 1B, and 2-like; cd07141]	[order(89..90,94,97,99,103,144,147..148,152,154..155,][order(182..185,209,212,242,246..247,260,263,266,286..287,][order(186,285,316,319)][186]	[other][other][active][other]	[homotetrameric interface [polypeptide binding]][NAD binding site [chemical binding]][catalytic residues [active]][Transition state stabilizer; propagated from UniProtKB/Swiss-Prot (P05091.2)]				2	NP_000681.2;NP_001191818.1	211	NP_000681.2	0 genes:. 2 proteins in this group did not match any genes. NP_000681.2:aldehyde dehydrogenase, mitochondrial isoform 1 precursor [Homo sapiens] ;NP_001191818.1:aldehyde dehydrogenase, mitochondrial isoform 2 precursor [Homo sapiens] ;	0	0	0	0	0	0	0	0	0	0	0	0	0	0	0	0	0	0	0	0.00060039	0	0	0	0	0	0
114	o	5	0.048	Q	0	CETN3		5		[15..190][29..91][102..154]	[PTZ00183][EFh][EFh]	[centrin; Provisional][EF-hand, calcium binding motif; A diverse superfamily of calcium sensors and calcium signal modulators; most examples in this alignment model have 2 active canonical EF hands. Ca2+ binding induces a conformational change in the EF-hand motif, leading to...; cd00051][EF-hand, calcium binding motif; A diverse superfamily of calcium sensors and calcium signal modulators; most …	[order(38,40,42,49,74,76,78,85)][order(111,113,115,122,147,149,151)]	[other][other]	[Ca2+ binding site [ion binding]][Ca2+ binding site [ion binding]]				2	NP_001284694.1;NP_004356.2	213	NP_001284694.1	0 genes:. 2 proteins in this group did not match any genes. NP_001284694.1:centrin-3 isoform 1 [Homo sapiens] ;NP_004356.2:centrin-3 isoform 2 [Homo sapiens] ;	0	0	0	0	0	0	0	0	0	0	0	0	0	0	0	0	0	0	0	0	0	0.00059877	0	0	0	0
115	o	12	0.047	Q	0	C1orf35		1		[13..83]	[MMtag]	[Kinase phosphorylation protein; pfam10159]	[127][164][175][215][215][217][219][219][220][220]	[phosphorylation][phosphorylation][phosphorylation][phosphorylation][phosphorylation][phosphorylation][phosphorylation][phosphorylation][phosphorylation][phosphorylation]	[Phosphoserine. {ECO:0000244|PubMed:18669648}; propagated from UniProtKB/Swiss-Prot (Q9BU76.1)][Phosphoserine. {ECO:0000244|PubMed:18669648}; propagated from UniProtKB/Swiss-Prot (Q9BU76.1)][][][Phosphothreonine. {ECO:0000244|PubMed:21406692}; propagated from UniProtKB/Swiss-Prot (Q9BU76.1)][][][Phosphothreonine. {ECO:0000244|PubMed:20068231}; propagated from UniProtKB/Swiss-Prot (Q9BU76.1)][][Ph…				1	NP_077295.1	215	NP_077295.1	multiple myeloma tumor-associated protein 2 [Homo sapiens]	0	0	0	0	0	0	0	0	0	0	0	0	0	0	0	0	0	0	0	0	0	0	0.00011701	0	0	0
116	o	27	0.443	S	27	TACO1		17		[61..297]	[Transcrip_reg]	[Transcriptional regulator; pfam01709]							1	NP_057444.2	220	NP_057444.2	translational activator of cytochrome c oxidase 1 [Homo sapiens]	0	0	0	0	0	0	0	0	0	0	0	0	0	0	0	0	0	0	0	0	0	0.00019253	0.00062171	0	0	0
117	o	36	0.21	Q	20	RAB21		12		[20..181][21..182]	[Rab21][Ras]	[Rab GTPase family 21 (Rab21); cd04123][Ras family; pfam00071]	[20..21][26..33][order(28,31..34,44,50..51,132..133,135,162..164)][order(34..44,49..50)][order(44,49..57)][order(49,53..60,67,69)][51][order(52,54..56,71,73,80..81,84,88,90..93)][order(52..53,55,73..74,81,83,85..87)][52..56][69..73][74..77][order(77,79..89)][80..85][88..92][97..102][125..129][132..135][162..164][178..181]	[other][other][other][other][other][other][other][other][other][other][other][other][other][other][other][other][other][other][other][other]	[Rab subfamily motif 1 (RabSF1)][G1 box][GTP/Mg2+ binding site [chemical binding]][Rab subfamily motif 2 (RabSF2)][Switch I region][putative GEF interaction site [polypeptide binding]][G2 box][putative effector interaction site][putative GDI interaction site [polypeptide binding]][Rab family motif 1 (RabF1)][Rab family motif 2 (RabF2)][G3 box][Switch II region][Rab family motif 3 (RabF3)][Rab fam…				1	NP_055814.1	221	NP_055814.1	ras-related protein Rab-21 [Homo sapiens]	0	0	0	0	0	0	0	0	0	0	0	0	0	0	0	0	0	0	0	0	0	0	0.00013678	0	0	0
118	o	17	0.146	Q	18	SLC9A3R1		17		[12..91][152..231][320..358]	[PDZ_signaling][PDZ_signaling][EBP50_C-term]	[PDZ domain found in a variety of Eumetazoan signaling molecules, often in tandem arrangements. May be responsible for specific protein-protein interactions, as most PDZ domains bind C-terminal polypeptides, and binding to internal (non-C-terminal)...; cd00992][PDZ domain found in a variety of Eumetazoan signaling molecules, often in tandem arrangements. May be responsible for specific protein-pr…	[2][2][order(23..26,28,75..76,79..80)][46][162][order(163..166,168,215..216,219..220)][269][269][280][280][290][290][290][291][293][294][299][302]	[acetylation][phosphorylation][other][phosphorylation][phosphorylation][other][phosphorylation][phosphorylation][phosphorylation][phosphorylation][phosphorylation][phosphorylation][phosphorylation][phosphorylation][phosphorylation][phosphorylation][phosphorylation][phosphorylation]	[N-acetylserine. {ECO:0000244|PubMed:19413330, ECO:0000244|PubMed:22223895, ECO:0000244|PubMed:22814378, ECO:0000244|PubMed:25944712, ECO:0000269|Ref.8}; propagated from UniProtKB/Swiss-Prot (O14745.4)][Phosphoserine. {ECO:0000250|UniProtKB:Q9JJ19}; propagated from UniProtKB/Swiss-Prot (O14745.4)][protein binding site [polypeptide binding]][Phosphoserine. {ECO:0000244|PubMed:20068231}; propagated…				1	NP_004243.1	223	NP_004243.1	Na(+)/H(+) exchange regulatory cofactor NHE-RF1 [Homo sapiens]	0	0	0	0	0	0	0	0	0	0	0	0	0	0	0	0	0	0	0	0.00034682	0	0	0	0	0	0
119						ZNF330		4		[<11..253]	[NOA36]	[NOA36 protein; pfam06524]							2	NP_001278931.1;NP_055302.1	224	NP_001278931.1	0 genes:. 2 proteins in this group did not match any genes. NP_001278931.1:zinc finger protein 330 isoform 2 [Homo sapiens] ;NP_055302.1:zinc finger protein 330 isoform 1 [Homo sapiens] ;	0	0	0	0	0	0	0	0	0	0	0	0	0	0	0	0	0	0	0	0	0.00185931	0.00021993	0	0	0	0
120	o109-131i172-194o209-231i	20	0.183	Q	25	SLC25A5		X		[6..98][7..296][7..101][110..206][111..201][209..297][212..297][235..240]	[Solcar 1][PTZ00169][Mito_carr][Mito_carr][Solcar 2][Mito_carr][Solcar 3][Substrate recognition. {ECO:0000250}]	[propagated from UniProtKB/Swiss-Prot (P05141.7)][ADP/ATP transporter on adenylate translocase; Provisional][Mitochondrial carrier protein; pfam00153][Mitochondrial carrier protein; pfam00153][propagated from UniProtKB/Swiss-Prot (P05141.7)][Mitochondrial carrier protein; pfam00153][propagated from UniProtKB/Swiss-Prot (P05141.7)][propagated from UniProtKB/Swiss-Prot (P05141.7)]	[1][2][5..39][23][43][52][75..100][92][96][105][105][109..143][147][147][163][166][176..202][207..241][268][268][273..298]	[acetylation][acetylation][transmembrane region][modified][modified][methylation][transmembrane region][modified][modified][acetylation][modified][transmembrane region][acetylation][modified][acetylation][acetylation][transmembrane region][transmembrane region][acetylation][modified][transmembrane region]	[N-acetylmethionine. {ECO:0000244|PubMed:19413330}; propagated from UniProtKB/Swiss-Prot (P05141.7)][N-acetylthreonine, in ADP/ATP translocase 2, N-terminally processed. {ECO:0000244|PubMed:19413330, ECO:0000244|PubMed:22223895, ECO:0000244|PubMed:25944712, ECO:0000269|Ref.7, ECO:0000269|Ref.8}; propagated from UniProtKB/Swiss-Prot (P05141.7)][propagated from UniProtKB/Swiss-Prot (P05141.7)][N6-m…				1	NP_001143.2	225	NP_001143.2	ADP/ATP translocase 2 [Homo sapiens]	0	0	0	0	0	0	0	0.00108228	0	0	0	0	0	0	0	0	0	0	0	0	0	0	0	0	0	0
121	o	20	0.657	S	20	TFAM		10		[50..115][155..216]	[HMGB-UBF_HMG-box][HMGB-UBF_HMG-box]	[HMGB-UBF_HMG-box, class II and III members of the HMG-box superfamily of DNA-binding proteins. These proteins bind the minor groove of DNA in a non-sequence specific fashion and contain two or more tandem HMG boxes. Class II members include non-histone...; cd01390][HMGB-UBF_HMG-box, class II and III members of the HMG-box superfamily of DNA-binding proteins. These proteins bind the minor groove …	[order(52,54..55,57..58,61..62,65,69,82,85,88,107)][55][56][58][61][order(157,159..160,162..163,166..167,170,174,183,186,189,][160][182][193]	[DNA binding][phosphorylation][phosphorylation][other][phosphorylation][DNA binding][phosphorylation][other][phosphorylation]	[DNA binding site [nucleotide binding]][Phosphoserine, by PKA; propagated from UniProtKB/Swiss-Prot (Q00059.1)][Phosphoserine, by PKA; propagated from UniProtKB/Swiss-Prot (Q00059.1)][Intercalates between bases and promotes DNA bending; propagated from UniProtKB/Swiss-Prot (Q00059.1)][Phosphoserine, by PKA; propagated from UniProtKB/Swiss-Prot (Q00059.1)][DNA binding site [nucleotide binding]][Ph…				1	NP_003192.1	226	NP_003192.1	transcription factor A, mitochondrial isoform 1 precursor [Homo sapiens]	0	0	0	0	0	0	0	0	0	0	0	0	0	0	0	0	0	0	0	0	0	0.0004649	0	0	0	0
122	o	17	0.138	Q	17	IGF2BP2		3		[2..78][4..71][82..157][83..147][196..259][277..342][387..450][468..532]	[RRM1_IGF2BP2][RRM][RRM2_IGF2BP2][RRM][KH-I][KH-I][PCBP_like_KH][KH-I]	[RNA recognition motif 1 in vertebrate insulin-like growth factor 2 mRNA-binding protein 2 (IGF2BP2); cd12626][RNA recognition motif; smart00360][RNA recognition motif 2 in vertebrate insulin-like growth factor 2 mRNA-binding protein 2 (IGF2BP2); cd12629][RNA recognition motif; smart00360][K homology RNA-binding domain, type I. KH binds single-stranded RNA or DNA. It is found in a wide variety of…	[164][order(203,205..207,209..213,216..217,220..221,226..229)][210..213][order(284,286..288,290..294,297..298,301..302,307..310)][291..294][order(394,396..398,400..404,407..408,411..412,415..418)][401..404][order(476,478..480,482..486,489..490,493..494,499..502)][483..486]	[phosphorylation][other][other][other][other][other][other][other][other]	[][nucleic acid binding region [nucleotide binding]][G-X-X-G motif][nucleic acid binding region [nucleotide binding]][G-X-X-G motif][nucleic acid binding region [nucleotide binding]][G-X-X-G motif][nucleic acid binding region [nucleotide binding]][G-X-X-G motif]				1	NP_001007226.1	227	NP_001007226.1	insulin-like growth factor 2 mRNA-binding protein 2 isoform b [Homo sapiens]	0	0	0	0	0	0	0	0	0	0	0	0	0	0	0	0	0	0	0	0.00019141	0.00043473	0	0	0	0	0
123	o	39	0.026	Q	55	TERF2IP		16		[133..189][306..399][383..399]	[rap1_myb-like][rap1_RCT][Nuclear localization signal. {ECO:0000255}]	[DNA-binding modules of yeast Rap1 and related proteins; cd11655][C-terminal domain of RAP1 recruits proteins to telomeres; cd11653][propagated from UniProtKB/Swiss-Prot (Q9NYB0.1)]	[2][32][36][order(133,136,175..176,178,181..183,185,187)][154][154][156][203][203][203][205][206][order(306,311,314..315,318,329..330,333..334,336..337,]	[acetylation][phosphorylation][phosphorylation][other][phosphorylation][phosphorylation][phosphorylation][phosphorylation][phosphorylation][phosphorylation][phosphorylation][phosphorylation][other]	[N-acetylalanine. {ECO:0000244|PubMed:19413330}; propagated from UniProtKB/Swiss-Prot (Q9NYB0.1)][][Phosphoserine. {ECO:0000244|PubMed:18669648, ECO:0000244|PubMed:20068231}; propagated from UniProtKB/Swiss-Prot (Q9NYB0.1)][putative DNA binding site [nucleotide binding]][][Phosphoserine. {ECO:0000244|PubMed:18669648, ECO:0000244|PubMed:19690332, ECO:0000244|PubMed:20068231}; propagated from UniPr…				1	NP_061848.2	229	NP_061848.2	telomeric repeat-binding factor 2-interacting protein 1 [Homo sapiens]	0	0	0	0	0	0	0	0	0	0.00055177	0	0	0	0	0	0.00210371	0	0	0	0	0	0	0	0	0	0
124						CCT7		2		[1..481][1..476]	[TCP1_eta][thermosome_arch]	[TCP-1 (CTT or eukaryotic type II) chaperonin family, eta subunit. Chaperonins are involved in productive folding of proteins. They share a common general morphology, a double toroid of 2 stacked rings. In contrast to bacterial group I chaperonins (GroEL); cd03340][thermosome, various subunits, archaeal; TIGR02339]	[order(1..4,6,24,26,30,34,37,335,471..477)][order(48,52,117,347,365,405,448,450)][order(385,403,412,414..415,418)]	[other][other][other]	[ring oligomerisation interface [polypeptide binding]][ATP/Mg binding site [chemical binding]][stacking interactions]				2	NP_001159757.1;NP_006420.1	231	NP_001159757.1	0 genes:. 2 proteins in this group did not match any genes. NP_001159757.1:T-complex protein 1 subunit eta isoform d [Homo sapiens] ;NP_006420.1:T-complex protein 1 subunit eta isoform a [Homo sapiens] ;	0	0	0	0	0	0	0	0.00032317	0	0	0	0.00168505	0	0	0	0	0	0	0	0	0	0	0	0	0	0
125	o	42	0.043	Q	62	HIST2H2AA3		1		[1..130][6..120]	[PTZ00017][H2A]	[histone H2A; Provisional][Histone 2A; H2A is a subunit of the nucleosome. The nucleosome is an octamer containing two H2A, H2B, H3, and H4 subunits. The H2A subunit performs essential roles in maintaining structural integrity of the nucleosome, chromatin condensation, and binding...; cd00074]	[2][2][4][4][order(6,10)][6][order(30,33,36..37,43,75,78)][37][39..42][order(52,55..56,59..60,63..64)][105][119][120][120][121][123][126]	[acetylation][phosphorylation][modified][methylation][acetylation][acetylation][DNA binding][modified][other][other][methylation][modified][modified][other][phosphorylation][phosphorylation][modified]	[N-acetylserine. {ECO:0000269|PubMed:15823041, ECO:0000269|PubMed:16457589}; propagated from UniProtKB/Swiss-Prot (Q6FI13.3)][Phosphoserine, by RPS6KA5. {ECO:0000269|PubMed:15010469}; propagated from UniProtKB/Swiss-Prot (Q6FI13.3)][Citrulline, alternate. {ECO:0000269|PubMed:15823041}; propagated from UniProtKB/Swiss-Prot (Q6FI13.3)][Symmetric dimethylarginine, by PRMT5, alternate. {ECO:0000250|U…				1	NP_003507.1	233	NP_003507.1	histone H2A type 2-A [Homo sapiens]	0	0	0	0.0254221	0.00773666	0.0179816	0	0.00620228	0	0.0135481	0	0.00646799	0	0	0	0.00161419	0	0	0	0.00047754	0	0	0	0	0	0
126	i	13	0.112	Q	28	C11orf31		11		[36..119]	[CXXU_selWTH]	[selT/selW/selH selenoprotein domain; TIGR02174]	[20][44]	[acetylation][other]	[N6-acetyllysine. {ECO:0000244|PubMed:19608861}; propagated from UniProtKB/Swiss-Prot (Q8IZQ5.2)][Selenocysteine]				1	NP_734467.1	235	NP_734467.1	selenoprotein H [Homo sapiens]	0	0	0	0	0	0	0	0	0	0	0	0	0	0	0	0	0	0	0	0	0	0.00140613	0.00302702	0	0	0
127	o	17	0.059	Q	0	ILF3		19		[88..342][371..389][402..465][527..>572][609..894]	[DZF][Bipartite nuclear localization signal. {ECO:0000255}][DSRM][DSRM][Interaction with PRMT1]	[domain in DSRM or ZnF_C2H2 domain containing proteins; smart00572][propagated from UniProtKB/Swiss-Prot (Q12906.3)][Double-stranded RNA binding motif. Binding is not sequence specific but is highly specific for double stranded RNA. Found in a variety of proteins including dsRNA dependent protein kinase PKR, RNA helicases, Drosophila staufen protein, E. coli RNase III; cd00048][Double-stranded RN…	[62][62][100][188][190][190][315][382][382][382][384][384][order(407..408,448..451,454)][460][469][476][476][477][477][482][482][486][511][522][order(527,533..534,571..572)][592][592][609][792][810][812]	[phosphorylation][phosphorylation][acetylation][phosphorylation][phosphorylation][phosphorylation][phosphorylation][phosphorylation][phosphorylation][phosphorylation][phosphorylation][phosphorylation][other][acetylation][phosphorylation][phosphorylation][phosphorylation][phosphorylation][phosphorylation][phosphorylation][phosphorylation][phosphorylation][phosphorylation][phosphorylation][other][p…	[][Phosphoserine. {ECO:0000244|PubMed:20068231, ECO:0000244|PubMed:21406692, ECO:0000244|PubMed:24275569}; propagated from UniProtKB/Swiss-Prot (Q12906.3)][N6-acetyllysine. {ECO:0000244|PubMed:19608861}; propagated from UniProtKB/Swiss-Prot (Q12906.3)][Phosphothreonine, by PKR. {ECO:0000269|PubMed:21123651}; propagated from UniProtKB/Swiss-Prot (Q12906.3)][][Phosphoserine. {ECO:0000244|PubMed:186…				2	NP_036350.2;NP_060090.2	237	NP_036350.2	0 genes:. 2 proteins in this group did not match any genes. NP_036350.2:interleukin enhancer-binding factor 3 isoform a [Homo sapiens] ;NP_060090.2:interleukin enhancer-binding factor 3 isoform d [Homo sapiens] ;	0	0	0	0	0	0	0	0	0	0	0	0	0	0	0	0	0	0	0	0	0	0	0	0	0	0.00422525
128	o	32	0.042	Q	0	TES		7		[109..196][236..293][299..354][361..419]	[PET_testin][LIM1_Testin][LIM2_Testin][LIM3_Testin]	[The PET domain of Testin; cd09829][The first LIM domain of Testin; cd09413][The second LIM domain of Testin; cd09416][The third LIM domain of Testin; cd09419]	[order(236,239,262,265,268,271,289,292)][237][251][288][order(301,304,322,325,328,331,349,352)][order(361,364,383,388,391,394,412,416)]	[other][phosphorylation][phosphorylation][phosphorylation][other][other]	[Zn binding site [ion binding]][][][][Zn binding site [ion binding]][Zn binding site [ion binding]]				2	NP_056456.1;NP_690042.1	242	NP_056456.1	0 genes:. 2 proteins in this group did not match any genes. NP_056456.1:testin isoform 1 [Homo sapiens] ;NP_690042.1:testin isoform 2 [Homo sapiens] ;	0	0	0	0	0	0	0	0	0	0	0	0	0	0	0	0	0	0	0	0	0	0	0.0001462	0	0	0
129	o	38	0.061	Q	40	SERPINB3		18		[4..390]	[ovalbumin_like]	[The ovalbumin_like group of serpins contains ovalbumin, the squamous cell carcinoma antigen 1 (SCCA1) and other closely related serpins of clade B of the serpin superfamily. Ovalbumin, the major protein component of avian egg white, is a non-inhibitory...; cd02059]	[1][order(340..350,363..368)][353][354..355]	[acetylation][other][modified][other]	[N-acetylmethionine. {ECO:0000269|Ref.13}; propagated from UniProtKB/Swiss-Prot (P29508.2)][reactive center loop][proteolytic cleavage site][Reactive bond; propagated from UniProtKB/Swiss-Prot (P29508.2)]				1	NP_008850.1	245	NP_008850.1	serpin B3 [Homo sapiens]	0.00096457	0	0	0	0	0	0	0	0	0	0	0	0	0	0	0	0	0	0	0.00015918	0	0.00073311	0.00023673	0	0	0
130						HTRA2		2	3.4.21.108	[182..330][<382..432]	[Trypsin_2][PDZ_metalloprotease]	[Trypsin-like peptidase domain; pfam13365][PDZ domain of bacterial and plant zinc metalloprotases, presumably membrane-associated or integral membrane proteases, which may be involved in signalling and regulatory mechanisms. May be responsible for substrate recognition and/or binding, as most PDZ...; cd00989]							4	NP_001308656.1;NP_001308657.1;NP_037379.1;NP_659540.1	246	NP_001308656.1	0 genes:. 4 proteins in this group did not match any genes. NP_001308656.1:serine protease HTRA2, mitochondrial isoform 3 preproprotein [Homo sapiens] ;NP_001308657.1:serine protease HTRA2, mitochondrial isoform 4 preproprotein [Homo sapiens] ;NP_037379.1:serine protease HTRA2, mitochondrial isoform 1 preproprotein [Homo sapiens] ;NP_659540.1:serine protease HTRA2, mitochondrial isoform 2 preprop…	0	0	0	0	0	0	0	0	0	0	0	0	0	0	0	0	0	0	0	0.00056955	0	0	0	0	0	0
131	o	42	0.432	S	49	MPO		17	1.11.2.2	[173..715][316..728]	[An_peroxidase][myeloperoxidase_like]	[Animal haem peroxidase; pfam03098][Myeloperoxidases, eosinophil peroxidases, and lactoperoxidases; cd09824]	[316][323][order(330,601,604)][order(334,338,340)][order(355,391,483)][355][391][order(405,408,495,498..499,502,505,531,583,590)][405][409][order(459,462..463,467,494,498,500,657,661,665..666,]	[sulfatation][glycosylation][other][other][other][glycosylation][glycosylation][other][other][modified][other]	[Cysteine sulfenic acid (-SOH). {ECO:0000269|PubMed:7840679}; propagated from UniProtKB/Swiss-Prot (P05164.1)][][homodimer interface [polypeptide binding]][Ca binding site [ion binding]][putative glycosylation site [posttranslational modification]][][][heme binding site [chemical binding]][Transition state stabilizer; propagated from UniProtKB/Swiss-Prot (P05164.1)][proteolytic cleavage site][put…				1	NP_000241.1	247	NP_000241.1	myeloperoxidase precursor [Homo sapiens]	0	0	0	0	0	0	0	0	0	0	0	0	0	0	0	0	0	0	0	0.00216658	0	0	0	0	0	0
132	o	39	0.189	Q	39	ATIC		2	2.1.2.3;3.5.4.10	[5..193][7..592][203..592][207..208]	[IMPCH][PurH][PRK07106][AICAR binding]	[Inosine monophosphate cyclohydrolase domain. This is the N-terminal domain in the purine biosynthesis pathway protein ATIC (purH). The bifunctional ATIC protein contains a C-terminal ATIC formylase domain that formylates...; cd01421][AICAR transformylase/IMP cyclohydrolase PurH [Nucleotide transport and metabolism]; COG0138][5-aminoimidazole-4-carboxamide ribonucleotide transformylase; Provision…	[1][order(12,14,34,37,66..67,102,125)][order(57,60..61,64..65,68..70,73..74,77,124..126,129,][order(66,125)][104][199][266]	[acetylation][other][other][active][phosphorylation][acetylation][other]	[N-acetylmethionine; propagated from UniProtKB/Swiss-Prot (P31939.3)][purine monophosphate binding site [chemical binding]][dimer interface [polypeptide binding]][putative catalytic residues [active]][][N6-acetyllysine; propagated from UniProtKB/Swiss-Prot (P31939.3)][Transition state stabilizer (Potential); propagated from UniProtKB/Swiss-Prot (P31939.3)]				1	NP_004035.2	248	NP_004035.2	bifunctional purine biosynthesis protein PURH [Homo sapiens]	0.00031772	0	0	0	0	0	0	0	0	0	0	0	0	0	0	0	0	0	0	0	0	0	0	0	0	0
133	i35-57o	49	0.337	A	48	ATP1B1		1	3.6.1.3	[1..303][191..303]	[Na_K_ATPase_bet][immunoglobulin-like]	[Sodium Potassium ATPase beta subunit; TIGR01107][propagated from UniProtKB/Swiss-Prot (P05026.1)]	[11][35..62][101]	[phosphorylation][transmembrane region][phosphorylation]	[Phosphoserine. {ECO:0000250|UniProtKB:P07340}; propagated from UniProtKB/Swiss-Prot (P05026.1)][propagated from UniProtKB/Swiss-Prot (P05026.1)][Phosphotyrosine. {ECO:0000250|UniProtKB:P14094}; propagated from UniProtKB/Swiss-Prot (P05026.1)]				1	NP_001668.1	249	NP_001668.1	sodium/potassium-transporting ATPase subunit beta-1 [Homo sapiens]	0	0	0	0	0	0.00072327	0	0	0	0	0	0	0	0	0	0	0	0	0	0	0	0	0	0	0	0
134	i98-120o130-149i290-312o322-344i776-798o802-824i862-884o913-932i953-975o985-1002i	5	0.037	Q	0	ATP1A1		1	3.6.3.9	[30..1023][40..114][82..84][135..366][427..521][606..752][799..1008]	[ATPase-IIC_X-K][Cation_ATPase_N][Phosphoinositide-3 kinase binding. {ECO:0000250}][E1-E2_ATPase][Hydrolase_like2][COG4087][Cation_ATPase_C]	[sodium or proton efflux -- potassium uptake antiporter, P-type ATPase, alpha subunit; TIGR01106][Cation transporter/ATPase, N-terminus; smart00831][propagated from UniProtKB/Swiss-Prot (P05023.1)][E1-E2 ATPase; pfam00122][Putative hydrolase of sodium-potassium ATPase alpha subunit; pfam13246][Soluble P-type ATPase [General function prediction only]][Cation transporting ATPase, C-terminus; pfam00…	[9][10][10][16][16][21][40][47][88..108][132..152][228][260][260][289..308][321..338][452][484][542][661][668][675][773..792][803..823][844..866][919..938][943][952..970][986..1006]	[acetylation][phosphorylation][phosphorylation][phosphorylation][phosphorylation][acetylation][phosphorylation][phosphorylation][transmembrane region][transmembrane region][phosphorylation][phosphorylation][phosphorylation][transmembrane region][transmembrane region][phosphorylation][phosphorylation][phosphorylation][modified][phosphorylation][phosphorylation][transmembrane region][transmembrane …	[N6-acetyllysine. {ECO:0000250|UniProtKB:Q8VDN2}; propagated from UniProtKB/Swiss-Prot (P05023.1)][][Phosphotyrosine. {ECO:0000250|UniProtKB:P06685}; propagated from UniProtKB/Swiss-Prot (P05023.1)][][Phosphoserine. {ECO:0000250|UniProtKB:P06685}; propagated from UniProtKB/Swiss-Prot (P05023.1)][N6-acetyllysine. {ECO:0000250|UniProtKB:Q8VDN2}; propagated from UniProtKB/Swiss-Prot (P05023.1)][Phos…				3	NP_000692.2;NP_001153705.1;NP_001153706.1	251	NP_000692.2	0 genes:. 3 proteins in this group did not match any genes. NP_000692.2:sodium/potassium-transporting ATPase subunit alpha-1 isoform a [Homo sapiens] ;NP_001153705.1:sodium/potassium-transporting ATPase subunit alpha-1 isoform c [Homo sapiens] ;NP_001153706.1:sodium/potassium-transporting ATPase subunit alpha-1 isoform d [Homo sapiens] ;	0	0	0	0	0.00589892	0.00299913	0	0.0014187	0.0041043	0.00150645	0	0	0	0	0	0	0	0	0	0	0	0	0	0	0	0
135	o	29	0.023	Q	0	MYH9		22		[29..71][83..764][95..764][654..676][971..1149][1055..>1208][1066..1923][<1206..1263][1523..1647]	[Myosin_N][Myosin_head][Motor_domain][Actin-binding][Lebercilin][GluZincin][Myosin_tail_1][RRF][TMF_TATA_bd]	[Myosin N-terminal SH3-like domain; pfam02736][Myosin head (motor domain); pfam00063][Myosin and Kinesin motor domain; cl22853][propagated from UniProtKB/Swiss-Prot (P35579.4)][Ciliary protein causing Leber congenital amaurosis disease; pfam15619][Peptidase Gluzincin family (thermolysin-like proteinases, TLPs) includes peptidases M1, M2, M3, M4, M13, M32 and M36 (fungalysins); cl14813][Myosin tai…	[2][8][11][91][102][order(122..123,174..181,224..225,452..457)][299][613][628][754][754][850][860][896][917][975][1024][1114][1249][1357][1392][1404][1408][1410][1459][1638][1669][1714][1793][1802][1845][1943][1943][1943]	[acetylation][acetylation][phosphorylation][modified][acetylation][other][acetylation][acetylation][phosphorylation][phosphorylation][phosphorylation][modified][acetylation][modified][modified][acetylation][acetylation][phosphorylation][acetylation][acetylation][acetylation][acetylation][phosphorylation][acetylation][acetylation][acetylation][modified][phosphorylation][acetylation][acetylation][a…	[N-acetylalanine. {ECO:0000269|Ref.10}; propagated from UniProtKB/Swiss-Prot (P35579.4)][N6-acetyllysine. {ECO:0000244|PubMed:19608861}; propagated from UniProtKB/Swiss-Prot (P35579.4)][Phosphotyrosine. {ECO:0000244|PubMed:19690332}; propagated from UniProtKB/Swiss-Prot (P35579.4)][S-nitrosylation site][N6-acetyllysine. {ECO:0000244|PubMed:19608861}; propagated from UniProtKB/Swiss-Prot (P35579.4…				1	NP_002464.1	252	NP_002464.1	myosin-9 [Homo sapiens]	0.00038386	0	0	0	0	0	0	0	0	0	0	0	0	0	0	0	0	0	0	0.00041176	0	0	0	0	0	0
136	i40-62o67-84i97-119o123-140i	25	0.214	A	31	PRAF2		X		[1..157]	[PRA1]	[PRA1 family protein; pfam03208]	[42..62][65..85][97..119][123..140]	[transmembrane region][transmembrane region][transmembrane region][transmembrane region]	[propagated from UniProtKB/Swiss-Prot (O60831.1)][propagated from UniProtKB/Swiss-Prot (O60831.1)][propagated from UniProtKB/Swiss-Prot (O60831.1)][propagated from UniProtKB/Swiss-Prot (O60831.1)]				1	NP_009144.1	253	NP_009144.1	PRA1 family protein 2 [Homo sapiens]	0	0	0	0	0	0.00246236	0	0	0.00943527	0	0	0	0	0	0	0	0	0	0	0	0	0	0	0	0	0
137	o	29	0.034	Q	0	CELF2		10		[15..98][18..485][107..187][<285..340][398..489]	[RRM1_CELF1_2_Bruno][ELAV_HUD_SF][RRM2_CELF1_2][AIRC][RRM3_CELF1_2]	[RNA recognition motif 1 in CUGBP Elav-like family member CELF-1, CELF-2, Drosophila melanogaster Bruno protein and similar proteins; cd12631][ELAV/HuD family splicing factor; TIGR01661][RNA recognition motif 2 in CUGBP Elav-like family member CELF-1, CELF-2 and similar proteins; cd12634][AIR carboxylase; cl00310][RNA recognition motif 3 in CUGBP Elav-like family member CELF-1, CELF-2 and similar…	[order(19,21..22,25,46..49,51..52,59..61,63,93,95,97..98)][order(109,111,113..114,117,136,138,140,148..150,152,]	[other][other]	[RNA binding site [nucleotide binding]][RNA binding site [nucleotide binding]]				4	NP_001020247.1;NP_001020248.1;NP_001077060.1;NP_006552.3	254	NP_001020247.1	0 genes:. 4 proteins in this group did not match any genes. NP_001020247.1:CUGBP Elav-like family member 2 isoform 1 [Homo sapiens] ;NP_001020248.1:CUGBP Elav-like family member 2 isoform 3 [Homo sapiens] ;NP_001077060.1:CUGBP Elav-like family member 2 isoform 4 [Homo sapiens] ;NP_006552.3:CUGBP Elav-like family member 2 isoform 2 [Homo sapiens] ;	0	0	0	0	0	0	0	0	0	0	0	0	0	0	0	0	0	0	0	0	0	0.0001167	0	0	0	0
138	o	7	0.071	Q	0	S100A7		1		[4..90][63..74]	[S-100][calcium binding region]	[S-100: S-100 domain, which represents the largest family within the superfamily of proteins carrying the Ca-binding EF-hand motif. Note that this S-100 hierarchy contains only S-100 EF-hand domains, other EF-hands have been modeled separately. S100...; cd00213][]	[2][order(4..21,25..26,35..36,38..40,70..73,75..76,78..81,][5][order(21,26,31..32,63,65,67,69,71,74)]	[acetylation][other][modified][other]	[N-acetylserine. {ECO:0000269|PubMed:8526920}; propagated from UniProtKB/Swiss-Prot (P31151.4)][dimerization interface [polypeptide binding]][transglutamination site][Ca2+ binding site [ion binding]]				1	NP_002954.2	256	NP_002954.2	protein S100-A7 [Homo sapiens]	0.111737	0	0	0	0	0.00433961	0	0.00478988	0	0.00435955	0	0	0	0	0	0	0	0	0	0.00184398	0	0.00509549	0.00792221	0	0	0
139	o	33	0.012	Q	0	FAM192A		16		[15..103]	[Nefa_Nip30_N]	[N-terminal domain of NEFA-interacting nuclear protein NIP30; pfam10187]	[1][139]	[acetylation][acetylation]	[N-acetylmethionine. {ECO:0000244|PubMed:19413330, ECO:0000244|PubMed:22223895, ECO:0000244|PubMed:22814378}; propagated from UniProtKB/Swiss-Prot (Q9GZU8.1)][N6-acetyllysine. {ECO:0000244|PubMed:19608861}; propagated from UniProtKB/Swiss-Prot (Q9GZU8.1)]				1	NP_079222.1	258	NP_079222.1	protein FAM192A [Homo sapiens]	0	0	0	0	0	0	0	0	0	0	0	0	0	0	0	0	0	0	0	0.00024441	0	0	0	0	0	0
140	o	21	0.063	Q	17	ERH		14		[1..103]	[ER]	[Enhancer of rudimentary; pfam01133]	[2][18][18][24][24]	[acetylation][phosphorylation][phosphorylation][phosphorylation][phosphorylation]	[N-acetylserine; propagated from UniProtKB/Swiss-Prot (P84090.1)][][][][]				1	NP_004441.1	259	NP_004441.1	enhancer of rudimentary homolog [Homo sapiens]	0	0	0	0	0	0	0	0	0	0	0	0	0	0	0	0	0	0	0	0	0.0232414	0.0170449	0.00710186	0.0200735	0.0261031	0
141	o	4	0.186	Q	16	CKB		14	2.7.3.2	[16..373]	[creatine_kinase_like]	[Phosphagen (guanidino) kinases such as creatine kinase and similar enzymes; cd00716]	[4][35][order(72,201,232,283,285)][125][order(128,130,132,191,228,236,292,294..296,320,322,][199][269][309][order(317..326,329..338)][322]	[phosphorylation][phosphorylation][other][phosphorylation][other][phosphorylation][modified][phosphorylation][other][phosphorylation]	[Phosphoserine. {ECO:0000244|PubMed:20068231}; propagated from UniProtKB/Swiss-Prot (P12277.1)][Phosphothreonine. {ECO:0000244|PubMed:18669648}; propagated from UniProtKB/Swiss-Prot (P12277.1)][creatine binding site [chemical binding]][Phosphotyrosine. {ECO:0000250|UniProtKB:Q04447}; propagated from UniProtKB/Swiss-Prot (P12277.1)][ADP binding site [chemical binding]][Phosphoserine. {ECO:0000244|…				1	NP_001814.2	260	NP_001814.2	creatine kinase B-type [Homo sapiens]	0	0	0	0	0	0	0	0	0	0	0	0	0	0	0	0	0	0	0	0.00016294	0	0	0	0	0	0
142	o	16	0.073	Q	16	SNRPD3		22		[6..75][110..119]	[Sm_D3][5 X 2 AA tandem repeats of [RM]-G]	[Sm protein D3; cd01721][propagated from UniProtKB/Swiss-Prot (P62318.1)]	[2][order(18..24,26..38,40..44)][order(21..24,26,28,34..35,40,42,60..70)][order(26,28,36,39,42,50,58,60..73)][order(38,40,51,64..66)][60..71][97][110][112][114][118]	[acetylation][other][other][other][other][other][methylation][methylation][methylation][methylation][methylation]	[N-acetylserine. {ECO:0000244|PubMed:19413330}; propagated from UniProtKB/Swiss-Prot (P62318.1)][Sm1 motif][putative hexamer interface [polypeptide binding]][heptamer interface [polypeptide binding]][RNA binding site [nucleotide binding]][Sm2 motif][][][][][]				1	NP_004166.1	261	NP_004166.1	small nuclear ribonucleoprotein Sm D3 [Homo sapiens]	0	0	0	0	0	0	0	0	0	0	0	0	0	0	0	0.00333087	0	0	0	0.00147811	0	0.00090766	0	0	0	0
143	o	31	0.012	Q	0	HMGN2		1		[2..90]	[HMG14_17]	[HMG14 and HMG17; pfam01101]	[3][3][14][18][25][25][25][25][29][29][29][29][31][42][48][82][82]	[acetylation][acetylation][acetylation][acetylation][phosphorylation][phosphorylation][phosphorylation][phosphorylation][phosphorylation][phosphorylation][phosphorylation][phosphorylation][acetylation][acetylation][acetylation][acetylation][acetylation]	[][][][][][][][Phosphoserine. {ECO:0000269|PubMed:10739259}; propagated from UniProtKB/Swiss-Prot (P05204.3)][][][][Phosphoserine. {ECO:0000269|PubMed:10739259}; propagated from UniProtKB/Swiss-Prot (P05204.3)][][][][][N6-acetyllysine. {ECO:0000269|PubMed:19608861}; propagated from UniProtKB/Swiss-Prot (P05204.3)]				1	NP_005508.1	264	NP_005508.1	non-histone chromosomal protein HMG-17 [Homo sapiens]	0	0	0	0	0	0	0	0	0	0	0	0	0	0	0	0	0	0	0	0	0.0107427	0.00063536	0.00239359	0	0	0
144	o	18	0.84	S	18	P4HB		17	5.3.4.1	[24..474][27..129][137..232][244..347][368..470][505..508]	[ER_PDI_fam][PDI_a_family][PDI_b_family][PDI_b'_family][PDI_a_PDI_a'_C][Prevents secretion from ER]	[protein disulfide isomerase, eukaryotic; TIGR01130][Protein Disulfide Isomerase (PDIa) family, redox active TRX domains; composed of eukaryotic proteins involved in oxidative protein folding in the endoplasmic reticulum (ER) by acting as catalysts and folding assistants. Members of this family include PDI...; cd02961][Protein Disulfide Isomerase (PDIb) family, redox inactive TRX-like domain b; c…	[order(53,56)][53][54][55][120][200][222][271][357][order(397,400,461)][397][398][399][461]	[active][modified][other][other][other][acetylation][modified][modified][phosphorylation][active][modified][other][other][other]	[catalytic residues [active]][alkylation site][Contributes to redox potential value; propagated from UniProtKB/Swiss-Prot (P07237.3)][Contributes to redox potential value; propagated from UniProtKB/Swiss-Prot (P07237.3)][Lowers pKa of C-terminal Cys of first active site; propagated from UniProtKB/Swiss-Prot (P07237.3)][N6-acetyllysine. {ECO:0000250|UniProtKB:P09103}; propagated from UniProtKB/Swi…				1	NP_000909.2	266	NP_000909.2	protein disulfide-isomerase precursor [Homo sapiens]	0	0	0	0	0	0	0	0	0	0.00043338	0	0	0	0.0049117	0.0110132	0.00330464	0	0	0.0325586	0.00843222	0.00380646	0	6.058e-05	0	0	0
145						UBQLN4		1		[13..83][13..83][172..209][538..577]	[UBQ][hPLIC_N][STI1][UBA_PLICs]	[Ubiquitin homologues; smart00213][Ubiquitin-like domain of hPLIC-1 and hPLIC2; cd01808][Heat shock chaperonin-binding motif; smart00727][UBA domain of eukaryotic protein linking integrin-associated protein (IAP, also known as CD47) with cytoskeleton (PLIC) proteins; cd14399]	[order(48,51,55,57..60,62,79,81..83)][order(548..553,569,572..574,576..577)]	[other][other]	[S5a binding site][polypeptide substrate binding site [polypeptide binding]]				1	NP_001291271.1	271	NP_001291271.1	ubiquilin-4 isoform 2 [Homo sapiens]	0	0	0	0	0	0	0	0	0	0	0	0	0	0	0	0	0	0	0	5.343e-05	0	9.842e-05	5.297e-05	0	0	0
146	i35-57o88-110i	53	0.184	A	53	REEP5		5		[51..145]	[TB2_DP1_HVA22]	[TB2/DP1, HVA22 family; pfam03134]	[35..55][90..110]	[transmembrane region][transmembrane region]	[propagated from UniProtKB/Swiss-Prot (Q00765.3)][propagated from UniProtKB/Swiss-Prot (Q00765.3)]				1	NP_005660.4	272	NP_005660.4	receptor expression-enhancing protein 5 [Homo sapiens]	0	0	0	0	0	0	0	0.00170645	0	0	0	0	0	0	0	0	0	0	0	0	0	0	0	0	0	0
147	o	18	0.573	S	25	C21orf33		21		[43..267][45..266]	[PRK11780][GATase1_ES1]	[isoprenoid biosynthesis protein with amidotransferase-like domain; Provisional][Type 1 glutamine amidotransferase (GATase1)-like domain found in zebrafish ES1; cd03133]	[177]	[active]	[conserved cys residue [active]]				1	NP_004640.4	275	NP_004640.4	ES1 protein homolog, mitochondrial isoform 1 precursor [Homo sapiens]	0	0	0	0	0	0	0	0	0	0	0	0	0	0	0	0	0	0	0	0	0	0.00064011	0.00057416	0	0	0
148						CDK11B		1	2.7.11.22	[409..700][412..702]	[STKc_CDC2L1][PLN00009]	[Catalytic domain of the Serine/Threonine Kinase, Cell Division Cycle 2-like 1; cd07843][cyclin-dependent kinase A; Provisional]	[order(421..424,429,442,444,461,475,493..496,499,501..502,][order(421..424,429,442,444,475,493..496,499,502,543..544,][order(453..455,457,460..461,463..464,467..468,480,482,489,][order(461,501,539,541,560,572,574..577,579,617..618)][order(556..567,569..579)]	[active][other][other][other][other]	[][ATP binding site [chemical binding]][CDK/cyclin interface [polypeptide binding]][polypeptide substrate binding site [polypeptide binding]][activation loop (A-loop)]				10	NP_001278274.1;NP_001300825.1;NP_001300911.1;NP_001778.2;NP_076916.2;NP_277021.2;NP_277022.1;NP_277024.2;NP_277025.1;NP_277071.2	276	NP_001278274.1	0 genes:. 10 proteins in this group did not match any genes. NP_001278274.1:cyclin-dependent kinase 11B isoform 10 [Homo sapiens] ;NP_001300825.1:cyclin-dependent kinase 11A isoform 5 [Homo sapiens] ;NP_001300911.1:cyclin-dependent kinase 11A isoform 3 [Homo sapiens] ;NP_001778.2:cyclin-dependent kinase 11B isoform 1 [Homo sapiens] ;NP_076916.2:cyclin-dependent kinase 11A isoform 1 [Homo sapiens]…	0	0	0	0	0	0	0	0	0	0	0	0	0	0	0	0	0	0	0	0.00016083	0	0	0	0	0	0
149						ZC2HC1A		8		[15..39]	[zf-C2HC_2]	[zinc-finger of a C2HC-type; pfam13913]	[244][292]	[phosphorylation][phosphorylation]	[Phosphothreonine. {ECO:0000244|PubMed:18669648}; propagated from UniProtKB/Swiss-Prot (Q96GY0.2)][Phosphoserine. {ECO:0000244|PubMed:20068231}; propagated from UniProtKB/Swiss-Prot (Q96GY0.2)]				1	NP_057094.2	278	NP_057094.2	zinc finger C2HC domain-containing protein 1A [Homo sapiens]	0	0	0	0	0	0	0	0	0	0	0	0	0	0	0	0	0	0	0	0	0	0	0.00018938	0	0	0
150	o	34	0.055	Q	37	OXSR1		3	2.7.11.1	[15..291][17..291]	[STKc_OSR1_SPAK][S_TKc]	[Catalytic domain of the Serine/Threonine Kinases, Oxidative stress response kinase and Ste20-related proline alanine-rich kinase; cd06610][Serine/Threonine protein kinases, catalytic domain; smart00220]	[2][order(23..27,31,44,46,76,92..95,98..99,102,146,148..151,][order(23..27,31,44,46,76,92..95,98..99,102,148,150..151,][order(26..27,146,148..150,167,186..189,191,219,228)][order(147..148,172..174,187..200,202..204,208,211..212,][order(163..176,183..191)][339][339][347][427][427]	[acetylation][active][other][other][other][other][phosphorylation][phosphorylation][phosphorylation][phosphorylation][phosphorylation]	[N-acetylserine. {ECO:0000269|PubMed:22223895}; propagated from UniProtKB/Swiss-Prot (O95747.1)][][ATP binding site [chemical binding]][polypeptide substrate binding site [polypeptide binding]][dimer interface [polypeptide binding]][activation loop (A-loop)][][Phosphoserine. {ECO:0000269|PubMed:17081983, ECO:0000269|PubMed:18318008, ECO:0000269|PubMed:18669648, ECO:0000269|PubMed:19690332, ECO:00…				1	NP_005100.1	286	NP_005100.1	serine/threonine-protein kinase OSR1 [Homo sapiens]	0	0	0	0	0	0	0	0	0	0	0	0	0	0	0	0	0	0	0	0	0	0	5.84e-05	0	0	0
151	o	19	0.118	Q	19	MRPS36		5					[1][61]	[acetylation][phosphorylation]	[N-acetylmethionine; propagated from UniProtKB/Swiss-Prot (P82909.2)][Phosphoserine; propagated from UniProtKB/Swiss-Prot (P82909.2)]				1	NP_150597.1	289	NP_150597.1	28S ribosomal protein S36, mitochondrial [Homo sapiens]	0	0	0	0	0	0	0	0.00469687	0	0	0	0	0	0	0	0	0	0	0	0	0.0023467	0	0.00029878	0	0	0
152						ZNF131		5		[24..129][137..148][<262..444][263..283][290..311][317..328][330..349][342..367][358..375][394..414][422..439]	[BTB][Nuclear localization signal 1. {ECO:0000269|PubMed:17306895}][COG5048][C2H2 Zn finger][C2H2 Zn finger][Nuclear localization signal 2. {ECO:0000269|PubMed:17306895}][C2H2 Zn finger][zf-H2C2_2][C2H2 Zn finger][C2H2 Zn finger][C2H2 Zn finger]	[BTB/POZ domain; pfam00651][propagated from UniProtKB/Swiss-Prot (P52739.2)][FOG: Zn-finger [General function prediction only]][C2H2 Zn finger [structural motif]][C2H2 Zn finger [structural motif]][propagated from UniProtKB/Swiss-Prot (P52739.2)][C2H2 Zn finger [structural motif]][Zinc-finger double domain; pfam13465][C2H2 Zn finger [structural motif]][C2H2 Zn finger [structural motif]][C2H2 Zn f…	[order(263,266,279,283)][order(290,293,306,311)][order(295,297,299,301..302,305..306,309,335,337,341..342,][order(330,333,346,350)][order(394,397,410,414)]	[other][other][other][other][other]	[Zn binding site [ion binding]][Zn binding site [ion binding]][putative nucleic acid binding site [nucleotide binding]][Zn binding site [ion binding]][Zn binding site [ion binding]]				2	NP_001284477.1;NP_003423.1	290	NP_001284477.1	0 genes:. 2 proteins in this group did not match any genes. NP_001284477.1:zinc finger protein 131 isoform 1 [Homo sapiens] ;NP_003423.1:zinc finger protein 131 isoform 2 [Homo sapiens] ;	0	0	0	0	0	0	0	0	0	0.00035338	0	0.00033742	0	0.00600757	0	0.00134732	0	0	0	0	0	0	0	0	0	0
153	i7-29o	22	0.744	S	22	BPIFB1		20		[26..262][279..474]	[BPI1][BPI2]	[BPI/LBP/CETP N-terminal domain; Bactericidal permeability-increasing protein (BPI) / Lipopolysaccharide-binding protein (LBP) / Cholesteryl ester transfer protein (CETP) N-terminal domain; binds to and neutralizes lipopolysaccharides from the outer...; cd00025][BPI/LBP/CETP C-terminal domain; Bactericidal permeability-increasing protein (BPI) / Lipopolysaccharide-binding protein (LBP) / Choleste…	[26..32][order(31,36,39,43,46,102,141,143,153,204,208,212,253)][order(280..284,459..464,470..474)][order(284,289,292,296,299,355,386,388,397,434,438,442,446,]	[other][other][other][other]	[BPI dimerizatation interface [polypeptide binding]][apolar binding pocket][BPI dimerization interface [polypeptide binding]][apolar binding pocket]				1	NP_149974.2	291	NP_149974.2	BPI fold-containing family B member 1 precursor [Homo sapiens]	0	0	0	0	0	0	0	0	0	0	0	0	0	0	0	0	0	0	0	0.00166746	0	0	0	0	0	0
154	o	34	0.134	Q	34	CSTF1		20		[14..35][100..424][<104..428][106..145][171..210][215..254][260..301][303..343][395..430]	[Hydrophobic][WD40][WD40][WD 1][WD 2][WD 3][WD 4][WD 5][WD 6]	[propagated from UniProtKB/Swiss-Prot (Q05048.1)][WD40 domain, found in a number of eukaryotic proteins that cover a wide variety of functions including adaptor/regulatory modules in signal transduction, pre-mRNA processing and cytoskeleton assembly; typically contains a GH dipeptide 11-24 residues from...; cd00200][WD40 repeat [General function prediction only]; COG2319][propagated from UniProtK…	[order(107,125,129,135..136,171..172,190,194,200..201,][367]	[other][phosphorylation]	[structural tetrad][]				1	NP_001315.1	292	NP_001315.1	cleavage stimulation factor subunit 1 [Homo sapiens]	0	0	0	0	0	0	0	0	0	0	0	0	0	0	0	0	0	0	0	0.00144039	0	0	0	0	0	0
155	o	3	0.021	Q	0	PTMS		12					[2][4][5][15][92]	[acetylation][acetylation][phosphorylation][acetylation][acetylation]	[N-acetylserine; propagated from UniProtKB/Swiss-Prot (P20962.2)][N6-acetyllysine; propagated from UniProtKB/Swiss-Prot (P20962.2)][Phosphoserine; propagated from UniProtKB/Swiss-Prot (P20962.2)][N6-acetyllysine; propagated from UniProtKB/Swiss-Prot (P20962.2)][N6-acetyllysine; propagated from UniProtKB/Swiss-Prot (P20962.2)]				1	NP_002815.3	296	NP_002815.3	parathymosin [Homo sapiens]	0	0	0	0	0	0	0	0	0	0	0	0	0	0	0	0	0	0	0	0.00304317	0.00947883	0	0	0	0	0
156	o	29	0.067	Q	0	SEH1L		18		[10..49][11..>330][11..306][55..96][111..152][160..210][217..258][276..315]	[WD 1][WD40][WD40][WD 2][WD 3][WD 4][WD 5][WD 6]	[propagated from UniProtKB/Swiss-Prot (Q96EE3.3)][WD40 repeat [General function prediction only]; COG2319][WD40 domain, found in a number of eukaryotic proteins that cover a wide variety of functions including adaptor/regulatory modules in signal transduction, pre-mRNA processing and cytoskeleton assembly; typically contains a GH dipeptide 11-24 residues from...; cl02567][propagated from UniProtK…	[order(11,29,33,39..40,55..56,75,80,86..87,100,131,136,142,]	[other]	[structural tetrad]				2	NP_001013455.1;NP_112493.2	297	NP_001013455.1	0 genes:. 2 proteins in this group did not match any genes. NP_001013455.1:nucleoporin SEH1 isoform 1 [Homo sapiens] ;NP_112493.2:nucleoporin SEH1 isoform 2 [Homo sapiens] ;	0	0	0	0	0	0	0	0	0	0	0	0	0	0	0	0	0	0	0	0	0	0.00013583	0	0	0	0
157						CD3EAP		19		[38..206]	[RNA_polI_A34]	[DNA-directed RNA polymerase I subunit RPA34.5; pfam08208]	[1][29][82][130][138][174][207][287][289][311][492]	[acetylation][phosphorylation][phosphorylation][phosphorylation][phosphorylation][phosphorylation][phosphorylation][phosphorylation][phosphorylation][phosphorylation][phosphorylation]	[N-acetylmethionine. {ECO:0000244|PubMed:19413330, ECO:0000244|PubMed:22814378}; propagated from UniProtKB/Swiss-Prot (O15446.1)][Phosphoserine. {ECO:0000244|PubMed:18669648}; propagated from UniProtKB/Swiss-Prot (O15446.1)][Phosphotyrosine. {ECO:0000269|PubMed:16809778}; propagated from UniProtKB/Swiss-Prot (O15446.1)][Phosphoserine. {ECO:0000244|PubMed:18669648}; propagated from UniProtKB/Swiss…				2	NP_001284519.1;NP_036231.1	298	NP_001284519.1	0 genes:. 2 proteins in this group did not match any genes. NP_001284519.1:DNA-directed RNA polymerase I subunit RPA34 isoform 1 [Homo sapiens] ;NP_036231.1:DNA-directed RNA polymerase I subunit RPA34 isoform 2 [Homo sapiens] ;	0	0	0	0	0	0	0	0	0	0	0	0	0	0	0	0	0	0	0	0.00012125	0	0	0	0	0	0
158	i7-24o	25	0.845	S	25	PDIA4		7	5.3.4.1	[64..289][65..164][177..640][180..279][286..392][397..506][526..631][642..645]	[PTZ00102][PDI_a_family][ER_PDI_fam][PDI_a_family][PDI_b_ERp72][PDI_b'_ERp72_ERp57][PDI_a_PDI_a'_C][Prevents secretion from ER]	[disulphide isomerase; Provisional][Protein Disulfide Isomerase (PDIa) family, redox active TRX domains; composed of eukaryotic proteins involved in oxidative protein folding in the endoplasmic reticulum (ER) by acting as catalysts and folding assistants. Members of this family include PDI...; cd02961][protein disulfide isomerase, eukaryotic; TIGR01130][Protein Disulfide Isomerase (PDIa) family, …	[order(91,94)][order(206,209)][366][order(555,558,622)]	[active][active][acetylation][active]	[catalytic residues [active]][catalytic residues [active]][N6-acetyllysine. {ECO:0000244|PubMed:19608861}; propagated from UniProtKB/Swiss-Prot (P13667.2)][catalytic residues [active]]				1	NP_004902.1	300	NP_004902.1	protein disulfide-isomerase A4 precursor [Homo sapiens]	0	0	0	0	0	0	0	0	0	0	0	0	0	0	0	0	0	0	0	0.00096249	0.00112423	0.00017731	0	0	0	0
159	o	31	0.041	Q	32	UPF3B		X		[50..137]	[RRM_like_Smg4_UPF3B]	[RNA recognition motif-like Smg4_UPF3 domain in up-frameshift suppressor 3 homolog B on chromosome X (Upf3B); cd12728]	[order(50..60,62..73,75..103,105..137)][169]	[other][phosphorylation]	[polypeptide substrate binding site [polypeptide binding]][]				2	NP_075386.1;NP_542199.1	302	NP_075386.1	0 genes:. 2 proteins in this group did not match any genes. NP_075386.1:regulator of nonsense transcripts 3B isoform 2 [Homo sapiens] ;NP_542199.1:regulator of nonsense transcripts 3B isoform 1 [Homo sapiens] ;	0	0	0	0	0	0	0	0	0	0	0	0	0	0	0	0	0	0	0	0	0	0	6.548e-05	0	0	0
160	o	22	0.134	Q	22	HNRNPA0		5		[5..83][8..79][99..178][99..170][250..>269]	[RRM1_hnRNPA0][RRM][RRM2_hnRNPA0][RRM][HnRNPA1]	[RNA recognition motif 1 found in heterogeneous nuclear ribonucleoprotein A0 (hnRNP A0) and similar proteins; cd12326][RNA recognition motif; smart00360][RNA recognition motif 2 in heterogeneous nuclear ribonucleoprotein A0 (hnRNP A0) and similar proteins; cd12579][RNA recognition motif; smart00360][Nuclear factor hnRNPA1; pfam11627]	[1][84][180][180][188][291][291]	[acetylation][phosphorylation][phosphorylation][phosphorylation][phosphorylation][methylation][methylation]	[N-acetylmethionine; propagated from UniProtKB/Swiss-Prot (Q13151.1)][Phosphoserine, by MAPKAPK2; propagated from UniProtKB/Swiss-Prot (Q13151.1)][][][Phosphoserine; propagated from UniProtKB/Swiss-Prot (Q13151.1)][][Dimethylated arginine; propagated from UniProtKB/Swiss-Prot (Q13151.1)]				1	NP_006796.1	303	NP_006796.1	heterogeneous nuclear ribonucleoprotein A0 [Homo sapiens]	0	0	0	0	0	0	0	0	0	0	0	0	0	0	0	0	0	0	0	0	0	0.00074994	0.00121081	0.00273789	0.00178015	0.0123848
161						RBM34		1		[185..>220][186..>217]	[RRM_SF][RRM]	[RNA recognition motif (RRM) superfamily; cl17169][RNA recognition motif; smart00360]	[14][28][99][151]	[phosphorylation][phosphorylation][phosphorylation][acetylation]	[Phosphoserine. {ECO:0000244|PubMed:17081983, ECO:0000244|PubMed:19690332, ECO:0000244|PubMed:20068231, ECO:0000244|PubMed:21406692}; propagated from UniProtKB/Swiss-Prot (P42696.2)][Phosphoserine. {ECO:0000244|PubMed:17081983, ECO:0000244|PubMed:18669648, ECO:0000244|PubMed:19690332}; propagated from UniProtKB/Swiss-Prot (P42696.2)][Phosphoserine. {ECO:0000244|PubMed:17525332}; propagated from U…				2	NP_001155005.1;NP_055829.2	304	NP_001155005.1	0 genes:. 2 proteins in this group did not match any genes. NP_001155005.1:RNA-binding protein 34 isoform 2 [Homo sapiens] ;NP_055829.2:RNA-binding protein 34 isoform 1 [Homo sapiens] ;	0	0	0	0	0	0	0	0	0	0	0	0	0	0	0	0	0	0	0	0	0	0	0.00027355	0	0	0
162	o	33	0.023	Q	0	YWHAE		17		[4..233]	[14-3-3_epsilon]	[14-3-3 epsilon, an isoform of 14-3-3 protein; cd10020]	[1][order(6,10,13..14,16,26,59,62,66,81..82,84..85,88..89,92)][order(50,57,130..131,172,175..176,179,182..183,219..220,][50][57][65][69][118][123][130][131][137][210][232]	[acetylation][other][other][acetylation][other][phosphorylation][acetylation][acetylation][acetylation][other][phosphorylation][phosphorylation][phosphorylation][phosphorylation]	[N-acetylmethionine. {ECO:0000244|PubMed:19413330, ECO:0000269|Ref.12}; propagated from UniProtKB/Swiss-Prot (P62258.1)][putative dimer interface [polypeptide binding]][peptide binding site [polypeptide binding]][N6-acetyllysine. {ECO:0000244|PubMed:19608861}; propagated from UniProtKB/Swiss-Prot (P62258.1)][Interaction with phosphoserine on interacting protein; propagated from UniProtKB/Swiss-Pr…				1	NP_006752.1	306	NP_006752.1	14-3-3 protein epsilon [Homo sapiens]	0	0	0	0	0	0	0	0	0	0	0	0.0131896	0	0	0	0	0	0	0	0	0	0	0	0	0	0
163	o	20	0.903	S	20	STATH		4		[20..>52][20..25][38..62]	[Statherin][Hydroxyapatite-binding, inhibits crystal growth][Hydrophobic, inhibits precipitation of calcium phosphate salts]	[Statherin; pfam03875][propagated from UniProtKB/Swiss-Prot (P02808.2)][propagated from UniProtKB/Swiss-Prot (P02808.2)]	[21][21][22][22]	[phosphorylation][phosphorylation][phosphorylation][phosphorylation]	[][Phosphoserine; propagated from UniProtKB/Swiss-Prot (P02808.2)][][Phosphoserine; propagated from UniProtKB/Swiss-Prot (P02808.2)]				1	NP_003145.1	308	NP_003145.1	statherin isoform a precursor [Homo sapiens]	0	0	0	0	0	0	0	0	0	0	0	0	0	0	0	0	0	0	0	0.0210273	0	0	0	0	0	0
164	o	29	0.075	Q	29	KRT75		12		[1..148][148..461][149..458][149..184][185..203][204..296][<211..>280][297..319][320..458][356..>467][459..551]	[Head][Filament][Rod][Coil 1A][Linker 1][Coil 1B][RILP-like][Linker 12][Coil 2][Phage_GP20][Tail]	[propagated from UniProtKB/Swiss-Prot (O95678.2)][Intermediate filament protein; pfam00038][propagated from UniProtKB/Swiss-Prot (O95678.2)][propagated from UniProtKB/Swiss-Prot (O95678.2)][propagated from UniProtKB/Swiss-Prot (O95678.2)][propagated from UniProtKB/Swiss-Prot (O95678.2)][Rab interacting lysosomal protein-like 1 and 2 (Rilpl1 and Rilpl2); cl18042][propagated from UniProtKB/Swiss-Pr…	[400]	[other]	[Stutter; propagated from UniProtKB/Swiss-Prot (O95678.2)]				1	NP_004684.2	313	NP_004684.2	keratin, type II cytoskeletal 75 [Homo sapiens]	0	0	0	0	0	0	0	9.756e-05	0	0	0	0	0.00699069	0	0.00290106	0	0	0	0.00091891	0	0	0	0	0	0	0
166	o	31	0.013	Q	0	BRMS1L		14		[59..227]	[Sds3]	[Sds3-like; pfam08598]							1	NP_115728.2	319	NP_115728.2	breast cancer metastasis-suppressor 1-like protein [Homo sapiens]	0	0	0	0	0	0	0	0.00049925	0	0.0006816	0	0	0	0	0	0	0	0	0	0	0	0	0	0	0	0
168	o	30	0.903	S	30	QSOX1		1	1.8.3.2	[40..152][405..505]	[PDI_a_QSOX][Evr1_Alr]	[PDIa family, Quiescin-sulfhydryl oxidase (QSOX) subfamily; QSOX is a eukaryotic protein containing an N-terminal redox active TRX domain, similar to that of PDI, and a small C-terminal flavin adenine dinucleotide (FAD)-binding domain homologous to the...; cd02992][Erv1 / Alr family; pfam04777]	[order(70,73)][255][426]	[active][phosphorylation][phosphorylation]	[catalytic residues [active]][][Phosphoserine, by FAM20C. {ECO:0000269|PubMed:26091039}; propagated from UniProtKB/Swiss-Prot (O00391.3)]				2	NP_001004128.1;NP_002817.2	324	NP_001004128.1	0 genes:. 2 proteins in this group did not match any genes. NP_001004128.1:sulfhydryl oxidase 1 isoform b precursor [Homo sapiens] ;NP_002817.2:sulfhydryl oxidase 1 isoform a precursor [Homo sapiens] ;	0	0	0	0	0	0	0	0	0	0	0	0	0	0	0	0	0	0	0	0.00020557	0	0	0	0	0	0
169	o	38	0.066	Q	43	NBN		8		[32..100][600..664]	[BRCT][Nbs1_C]	[Breast Cancer Suppressor Protein (BRCA1), carboxy-terminal domain. The BRCT domain is found within many DNA damage repair and cell cycle checkpoint proteins. The unique diversity of this domain superfamily allows BRCT modules to interact forming homo...; cd00027][DNA damage repair protein Nbs1; pfam08599]	[order(44,48,51,54,56)][order(94,98)][196][261][315][347][350]	[other][other][phosphorylation][phosphorylation][phosphorylation][phosphorylation][phosphorylation]	[Dimer interface [polypeptide binding]][BRCT sequence motif][][][][][]				2	NP_001019859.1;NP_002476.2	325	NP_001019859.1	0 genes:. 2 proteins in this group did not match any genes. NP_001019859.1:nibrin isoform 2 [Homo sapiens] ;NP_002476.2:nibrin [Homo sapiens] ;	0	0	0	0	0	0	0	0	0	0	0	0	0	0	0	0	0	0	0	0	0	0.00025528	0	0	0	0
170	o	40	0.07	Q	40	FABP5		8		[9..134][129..131]	[Lipocalin][Fatty acid binding. {ECO:0000250}]	[Lipocalin / cytosolic fatty-acid binding protein family; pfam00061][propagated from UniProtKB/Swiss-Prot (Q01469.3)]	[2][17][131][131]	[acetylation][acetylation][phosphorylation][phosphorylation]	[N-acetylalanine. {ECO:0000244|PubMed:19413330, ECO:0000244|PubMed:22223895, ECO:0000244|PubMed:22814378, ECO:0000244|PubMed:25944712, ECO:0000269|PubMed:12665801}; propagated from UniProtKB/Swiss-Prot (Q01469.3)][N6-acetyllysine. {ECO:0000244|PubMed:19608861}; propagated from UniProtKB/Swiss-Prot (Q01469.3)][][Phosphotyrosine. {ECO:0000244|PubMed:15592455}; propagated from UniProtKB/Swiss-Prot (…				1	NP_001435.1	326	NP_001435.1	fatty acid-binding protein, epidermal [Homo sapiens]	0.0181125	0	0	0	0	0	0	0.00238903	0	0	0	0	0	0	0	0	0	0	0	0.00597814	0	0.00084715	0.00387534	0	0	0
171	o	18	0.101	Q	18	SOD1		21	1.15.1.1	[3..147]	[Cu-Zn_Superoxide_Dismutase]	[Copper/zinc superoxide dismutase (SOD). superoxide dismutases catalyse the conversion of superoxide radicals to molecular oxygen. Three evolutionarily distinct families of SODs are known, of which the copper/zinc-binding family is one. Defects in the...; cd00305]	[2][4][order(6,8,18,20,51..53,114..115)][10][order(31,89)][31][37][order(47,49,64,81,84,121)][order(47,49,64,121)][order(64,72,81,84)][99][123][123][123][129]	[acetylation][glycosylation][other][glycosylation][other][glycosylation][glycosylation][active][other][other][phosphorylation][glycosylation][acetylation][modified][glycosylation]	[N-acetylalanine; propagated from UniProtKB/Swiss-Prot (P00441.2)][glycation site][E-class dimer interface [polypeptide binding]][glycation site][P-class dimer interface [polypeptide binding]][glycation site][glycation site][][Cu2+ binding site [ion binding]][Zn2+ binding site [ion binding]][Phosphoserine; propagated from UniProtKB/Swiss-Prot (P00441.2)][glycation site][N6-acetyllysine, alternate…				1	NP_000445.1	327	NP_000445.1	superoxide dismutase [Cu-Zn] [Homo sapiens]	0.00244275	0	0	0	0	0	0	0	0	0	0	0	0	0	0	0	0	0	0	0	0	0	0	0	0	0
172	o	33	0.46	S	33	PMPCB		7	3.4.24.64	[46..478][68..214][220..404]	[PqqL][Peptidase_M16][Peptidase_M16_C]	[Predicted Zn-dependent peptidase [General function prediction only]; COG0612][Insulinase (Peptidase family M16); pfam00675][Peptidase M16 inactive domain; pfam05193]							1	NP_004270.2	331	NP_004270.2	mitochondrial-processing peptidase subunit beta precursor [Homo sapiens]	0	0	0	0	0	0	0	0	0	0	0	0.00085975	0	0	0	0	0	0	0	0	0	0	0	0	0	0
173	o	17	0.481	S	29	CS		12	2.3.3.1	[29..465][33..459]	[PLN02456][ScCit1-2_like]	[citrate synthase][Saccharomyces cerevisiae (Sc) citrate synthases Cit1-2_like. Citrate synthases (CS) catalyzes the condensation of acetyl coenzyme A (AcCoA) with oxaloacetate (OAA) to form citrate and coenzyme A (CoA), the first step in the citric acid cycle (TCA or...; cd06105]	[order(71..72,75..81,166,170,173,265,270,273..274,277..278,][order(73,265,269,299..302,304,307,341..348,351,356,397,][order(73,299..301,304,307,341..348,351,397,400,402,445)][order(73,265,269,300..301,341..342,344..348,356,400,428)][order(265,269,301..302,347..348,356,402,424,428,448)][order(301,347,402)][327][375][382][393]	[other][active][other][other][other][active][acetylation][acetylation][acetylation][acetylation]	[dimer interface [polypeptide binding]][][coenzyme A binding site [chemical binding]][citrylCoA binding site [chemical binding]][oxalacetate/citrate binding site [chemical binding]][catalytic triad [active]][N6-acetyllysine, alternate; propagated from UniProtKB/Swiss-Prot (O75390.2)][N6-acetyllysine, alternate; propagated from UniProtKB/Swiss-Prot (O75390.2)][N6-acetyllysine; propagated from UniP…				1	NP_004068.2	333	NP_004068.2	citrate synthase, mitochondrial precursor [Homo sapiens]	0	0	0	0	0	0	0	0	0	0	0	0	0	0	0	0	0	0	0	0.00013322	0	0	0	0	0	0
174	o	37	0.141	Q	37	DLD		7	1.8.1.4	[43..509][43..>79][215..288][389..497]	[PRK06327][NADB_Rossmann][Pyr_redox][Pyr_redox_dim]	[dihydrolipoamide dehydrogenase; Validated][Rossmann-fold NAD(P)(+)-binding proteins; cl21454][Pyridine nucleotide-disulphide oxidoreductase; pfam00070][Pyridine nucleotide-disulphide oxidoreductase, dimerization domain; pfam02852]	[143][410][417]	[acetylation][acetylation][acetylation]	[N6-acetyllysine, alternate; propagated from UniProtKB/Swiss-Prot (P09622.2)][N6-acetyllysine, alternate; propagated from UniProtKB/Swiss-Prot (P09622.2)][N6-acetyllysine; propagated from UniProtKB/Swiss-Prot (P09622.2)]				4	NP_000099.2;NP_001276679.1;NP_001276680.1;NP_001276681.1	336	NP_000099.2	0 genes:. 4 proteins in this group did not match any genes. NP_000099.2:dihydrolipoyl dehydrogenase, mitochondrial isoform 1 precursor [Homo sapiens] ;NP_001276679.1:dihydrolipoyl dehydrogenase, mitochondrial isoform 2 [Homo sapiens] ;NP_001276680.1:dihydrolipoyl dehydrogenase, mitochondrial isoform 3 [Homo sapiens] ;NP_001276681.1:dihydrolipoyl dehydrogenase, mitochondrial isoform 4 [Homo sapien…	0	0	0	0	0	0	0	0	0	0	0	0	0	0	0	0	0	0	0	0.00024393	0	0	0	0	0	0
175	o	23	0.867	S	23	FOLR3		11		[36..211]	[Folate_rec]	[Folate receptor family; pfam03024]							2	NP_000795.2;NP_001304974.1	341	NP_000795.2	0 genes:. 2 proteins in this group did not match any genes. NP_000795.2:folate receptor gamma isoform 1 precursor [Homo sapiens] ;NP_001304974.1:folate receptor gamma isoform 2 [Homo sapiens] ;	0	0	0	0	0	0	0	0	0	0	0	0	0	0	0	0	0	0	0	0.00025339	0	0	0	0	0	0
176	o	5	0.049	Q	0	SRSF2		17		[15..87][16..88]	[RRM][RRM_SRSF2_SRSF8]	[RNA recognition motif; smart00360][RNA recognition motif in serine/arginine-rich splicing factor SRSF2, SRSF8 and similar proteins; cd12311]	[2][2][22][23][25][25][26][26][26][52][187][189][189][191][191][204][206][206][208][208][212][212][212][220][220][221]	[acetylation][phosphorylation][phosphorylation][phosphorylation][phosphorylation][phosphorylation][phosphorylation][phosphorylation][phosphorylation][acetylation][phosphorylation][phosphorylation][phosphorylation][phosphorylation][phosphorylation][phosphorylation][phosphorylation][phosphorylation][phosphorylation][phosphorylation][phosphorylation][phosphorylation][phosphorylation][phosphorylation…	[N-acetylserine; propagated from UniProtKB/Swiss-Prot (Q01130.4)][Phosphoserine; propagated from UniProtKB/Swiss-Prot (Q01130.4)][Phosphothreonine; propagated from UniProtKB/Swiss-Prot (Q01130.4)][][][Phosphothreonine; propagated from UniProtKB/Swiss-Prot (Q01130.4)][][][Phosphoserine; propagated from UniProtKB/Swiss-Prot (Q01130.4)][N6-acetyllysine; propagated from UniProtKB/Swiss-Prot (Q01130.4…				1	NP_003007.2	342	NP_003007.2	serine/arginine-rich splicing factor 2 [Homo sapiens]	0	0	0	0	0.00606797	0	0	0	0	0.00099619	0	0	0	0	0	0	0	0	0	0.00084272	0	0	0.00055701	0.00377854	0.00491352	0
177	o	19	0.896	S	21	PLOD1		1	1.14.11.4	[562..725]	[P4Hc]	[Prolyl 4-hydroxylase alpha subunit homologues; smart00702]							2	NP_000293.2;NP_001303249.1	346	NP_000293.2	0 genes:. 2 proteins in this group did not match any genes. NP_000293.2:procollagen-lysine,2-oxoglutarate 5-dioxygenase 1 isoform 2 precursor [Homo sapiens] ;NP_001303249.1:procollagen-lysine,2-oxoglutarate 5-dioxygenase 1 isoform 1 precursor [Homo sapiens] ;	0	0	0	0	0	0	0	0	0	0	0	0	0	0	0	0	0	0	0	0.00025618	0	0	0	0	0	0
178	o	31	0.023	Q	0	PSMC3		11		[25..432][189..355]	[RPT1][AAA]	[ATP-dependent 26S proteasome regulatory subunit [Posttranslational modification, protein turnover, chaperones]; COG1222][The AAA+ (ATPases Associated with a wide variety of cellular Activities) superfamily represents an ancient group of ATPases belonging to the ASCE (for additional strand, catalytic E) division of the P-loop NTPase fold. The ASCE division also includes ABC; cd00009]	[1][9][227..234][order(228..235,286,333)][282..287][347]	[acetylation][phosphorylation][other][other][other][other]	[N-acetylmethionine. {ECO:0000244|PubMed:19413330, ECO:0000244|PubMed:20068231, ECO:0000244|PubMed:21406692, ECO:0000244|PubMed:22814378}; propagated from UniProtKB/Swiss-Prot (P17980.3)][Phosphoserine. {ECO:0000244|PubMed:17323924, ECO:0000244|PubMed:20068231, ECO:0000244|PubMed:21406692}; propagated from UniProtKB/Swiss-Prot (P17980.3)][Walker A motif][ATP binding site [chemical binding]][Walke…				1	NP_002795.2	347	NP_002795.2	26S protease regulatory subunit 6A [Homo sapiens]	0	0	0	0	0	0	0	0	0	0	0	0.00861907	0	0	0	0	0	0	0	0	0	0	0	0	0	0
179	o	27	0.025	Q	0	BTF3		5		[49..97]	[NAC]	[NAC domain; pfam01849]							1	NP_001198.2	349	NP_001198.2	transcription factor BTF3 isoform B [Homo sapiens]	0	0	0	0	0	0	0	0	0	0	0	0	0	0	0	0	0	0	0	0.00114964	0	0	0.00075987	0	0	0
180						KIAA1551		12		[669..1739]	[DUF4617]	[Domain of unknown function (DUF4617); pfam15395]	[1358]	[phosphorylation]	[Phosphoserine. {ECO:0000269|PubMed:21406692}; propagated from UniProtKB/Swiss-Prot (Q9HCM1.3)]				1	NP_060639.3	350	NP_060639.3	uncharacterized protein KIAA1551 [Homo sapiens]	0	0	0	0	0	0	0	0	0	0	0	0	0	0	0	0	0	0	0	0	0	0	1.762e-05	0	0	0
181						KIF23		15		[<101..321][<106..324][403..525]	[Kinesin][Motor_domain][DUF848]	[Kinesin motor domain; pfam00225][Myosin and Kinesin motor domain; cl22853][Gammaherpesvirus protein of unknown function (DUF848); pfam05852]							3	NP_001268230.1;NP_004847.2;NP_612565.1	352	NP_001268230.1	0 genes:. 3 proteins in this group did not match any genes. NP_001268230.1:kinesin-like protein KIF23 isoform 3 [Homo sapiens] ;NP_004847.2:kinesin-like protein KIF23 isoform 2 [Homo sapiens] ;NP_612565.1:kinesin-like protein KIF23 isoform 1 [Homo sapiens] ;	0	0	0	0	0	0	0	0	0	0	0	0	0	0	0	0	0	0	0	0	0.0006311	0.0001493	0	0	0	0
182	o	18	0.13	Q	18	PQBP1		X		[47..78][94..265][104..138][139..144][150..163][245..255]	[WW][Intrinsically disordered][5 X 7 AA approximate tandem repeats of D-R-[SG]-H-D-K-S][3 X 2 AA tandem repeats of [DE]-R][7 X 2 AA tandem repeats of [DE]-R][Important for interaction with TXNL4A]	[Domain with 2 conserved Trp (W) residues; smart00456][propagated from UniProtKB/Swiss-Prot (O60828.1)][propagated from UniProtKB/Swiss-Prot (O60828.1)][propagated from UniProtKB/Swiss-Prot (O60828.1)][propagated from UniProtKB/Swiss-Prot (O60828.1)][propagated from UniProtKB/Swiss-Prot (O60828.1)]	[94][247]	[phosphorylation][phosphorylation]	[Phosphoserine. {ECO:0000269|PubMed:20068231}; propagated from UniProtKB/Swiss-Prot (O60828.1)][Phosphoserine. {ECO:0000269|PubMed:18669648}; propagated from UniProtKB/Swiss-Prot (O60828.1)]				1	NP_005701.1	353	NP_005701.1	polyglutamine-binding protein 1 isoform 1 [Homo sapiens]	0	0	0	0	0	0	0	0	0	0	0	0	0	0	0	0	0	0	0	0.00445107	0	0.00043157	0.00104518	0	0	0
183	o	30	0.031	Q	0	HINT1		5		[16..118][110..114]	[PKCI_related][Histidine triad motif]	[Protein Kinase C Interacting protein related (PKCI): PKCI and related proteins belong to the ubiquitous HIT family of hydrolases that act on alpha-phosphates of ribonucleotides. The members of this subgroup have a conserved HxHxHxx motif (x is a...; cd01276][propagated from UniProtKB/Swiss-Prot (P49773.2)]	[2][21][30][order(41,43..44,51,53,99,106,108,112,114)][45][72][order(110,112,114..116)][112]	[acetylation][acetylation][acetylation][active][phosphorylation][phosphorylation][other][active]	[N-acetylalanine. {ECO:0000244|PubMed:22814378}; propagated from UniProtKB/Swiss-Prot (P49773.2)][N6-acetyllysine. {ECO:0000244|PubMed:19608861}; propagated from UniProtKB/Swiss-Prot (P49773.2)][N6-acetyllysine. {ECO:0000244|PubMed:19608861}; propagated from UniProtKB/Swiss-Prot (P49773.2)][nucleotide binding site/active site [active]][Phosphoserine. {ECO:0000250|UniProtKB:P70349}; propagated fro…				1	NP_005331.1	355	NP_005331.1	histidine triad nucleotide-binding protein 1 [Homo sapiens]	0	0	0	0	0	0	0	0	0	0	0	0	0	0	0	0	0	0	0	0	0	0	0.00048849	0	0	0
184	o	13	0.236	Q	20	LSM2		6		[2..90]	[LSm2]	[Like-Sm protein 2; cd01725]	[order(7,10..11,16,18..20,23,25,30..33,36..37,39,59..71)][order(15..21,23..35,37..41)][order(33,35,63)][59..70][79][79]	[other][other][other][other][phosphorylation][phosphorylation]	[putative oligomer interface [polypeptide binding]][Sm1 motif][putative RNA binding site [nucleotide binding]][Sm2 motif][][Phosphothreonine. {ECO:0000269|PubMed:17525332}; propagated from UniProtKB/Swiss-Prot (Q9Y333.1)]				1	NP_067000.1	358	NP_067000.1	U6 snRNA-associated Sm-like protein LSm2 [Homo sapiens]	0	0	0	0	0	0	0	0	0	0	0	0.00442546	0	0	0	0	0	0	0	0	0	0	0	0	0	0
185	o	25	0.16	Q	25	PRPF6		20		[13..169][384..416][405..428][418..444][433..459][444..476][445..476][464..491][554..586][588..620][621..673][622..654][643..670][689..721][708..738][709..774][723..755][725..755][743..768][777..805][855..887]	[PRP1_N][HAT 1][TPR repeat][HAT 2][TPR repeat][HAT][HAT 3][TPR repeat][HAT 4][HAT 5][TPR_19][HAT 6][TPR repeat][HAT 7][TPR repeat][TPR_11][HAT 8][HAT][TPR repeat][TPR repeat][HAT 9]	[PRP1 splicing factor, N-terminal; pfam06424][propagated from UniProtKB/Swiss-Prot (O94906.1)][TPR repeat [structural motif]][propagated from UniProtKB/Swiss-Prot (O94906.1)][TPR repeat [structural motif]][HAT (Half-A-TPR) repeats; smart00386][propagated from UniProtKB/Swiss-Prot (O94906.1)][TPR repeat [structural motif]][propagated from UniProtKB/Swiss-Prot (O94906.1)][propagated from UniProtKB/…	[266][275][279]	[phosphorylation][phosphorylation][phosphorylation]	[Phosphothreonine; propagated from UniProtKB/Swiss-Prot (O94906.1)][Phosphothreonine; propagated from UniProtKB/Swiss-Prot (O94906.1)][Phosphoserine; propagated from UniProtKB/Swiss-Prot (O94906.1)]				1	NP_036601.2	363	NP_036601.2	pre-mRNA-processing factor 6 [Homo sapiens]	0	0	0	0	0	0	0	0	0	0	0	0	0	0	0	0	0	0	0	0.00059376	0	0	0	0	0	0
186	i11-33o	34	0.804	S	34	PPIB		15	5.2.1.8	[45..203][213..216]	[cyclophilin_ABH_like][Prevents secretion from ER]	[cyclophilin_ABH_like: Cyclophilin A, B and H-like cyclophilin-type peptidylprolyl cis- trans isomerase (PPIase) domain. This family represents the archetypal cystolic cyclophilin similar to human cyclophilins A, B and H. PPIase is an enzyme which...; cd01926][propagated from UniProtKB/Swiss-Prot (P23284.2)]	[84][order(94..95,100,151,153,161)][165][202][202][209][209]	[modified][active][acetylation][nitrosylation][modified][acetylation][modified]	[N6-succinyllysine. {ECO:0000250|UniProtKB:Q99KR7}; propagated from UniProtKB/Swiss-Prot (P23284.2)][][N6-acetyllysine. {ECO:0000250|UniProtKB:Q99KR7}; propagated from UniProtKB/Swiss-Prot (P23284.2)][S-nitrosocysteine. {ECO:0000250|UniProtKB:Q99KR7}; propagated from UniProtKB/Swiss-Prot (P23284.2)][S-nitrosylation site][N6-acetyllysine, alternate. {ECO:0000250|UniProtKB:P24369}; propagated from …				1	NP_000933.1	366	NP_000933.1	peptidyl-prolyl cis-trans isomerase B precursor [Homo sapiens]	0	0	0	0	0	0	0	0	0	0	0	0	0	0	0	0	0	0	0	0	0	0.00476523	0.0158148	0.0599231	0.0326772	0.0349757
187	o	3	0.038	Q	0	PARP1		1	2.4.2.30	[6..1010][12..90][116..200][207..209][221..226][279..332][373..524][392..461][543..645][662..1006]	[PLN03123][zf-PARP][zf-PARP][Nuclear localization signal][Nuclear localization signal][PADR1][Automodification domain][BRCT][WGR_PARP1_like][parp_like]	[poly [ADP-ribose] polymerase; Provisional][Poly(ADP-ribose) polymerase and DNA-Ligase Zn-finger region; pfam00645][Poly(ADP-ribose) polymerase and DNA-Ligase Zn-finger region; pfam00645][propagated from UniProtKB/Swiss-Prot (P09874.4)][propagated from UniProtKB/Swiss-Prot (P09874.4)][PADR1 (NUC008) domain; pfam08063][propagated from UniProtKB/Swiss-Prot (P09874.4)][Breast Cancer Suppressor Prote…	[2][41][97][105][131][179][368][order(406,410,413,416,418)][458][600][621][order(662..724,727..752,757..779,787..794)][order(766,769..770,862..863,868,878..880,896..898,904,907,][order(766,770,862..864,872,876..878,896,904,907,988)][782]	[acetylation][phosphorylation][acetylation][acetylation][acetylation][phosphorylation][phosphorylation][other][other][acetylation][acetylation][other][inhibition][other][phosphorylation]	[N-acetylalanine; propagated from UniProtKB/Swiss-Prot (P09874.4)][Phosphoserine; propagated from UniProtKB/Swiss-Prot (P09874.4)][N6-acetyllysine; propagated from UniProtKB/Swiss-Prot (P09874.4)][N6-acetyllysine; propagated from UniProtKB/Swiss-Prot (P09874.4)][N6-acetyllysine; propagated from UniProtKB/Swiss-Prot (P09874.4)][Phosphoserine; propagated from UniProtKB/Swiss-Prot (P09874.4)][Phosph…				1	NP_001609.2	371	NP_001609.2	poly [ADP-ribose] polymerase 1 [Homo sapiens]	0	0	0	0	0.0145476	0.00561924	0	0.00429389	0.00496887	0.00238829	0	0.00020731	0	0.00061517	0	0.00124169	0	0	0	0.00055101	0.00071512	0.00062033	0.00027315	0	0.0010709	0
188	o	44	0.017	Q	0	NDRG3		20		[20..305]	[Ndr]	[Ndr family; pfam03096]	[326][334][336][340]	[phosphorylation][phosphorylation][phosphorylation][phosphorylation]					2	NP_071922.2;NP_114402.1	372	NP_071922.2	0 genes:. 2 proteins in this group did not match any genes. NP_071922.2:protein NDRG3 isoform b [Homo sapiens] ;NP_114402.1:protein NDRG3 isoform a [Homo sapiens] ;	0	0	0	0	0	0	0	0	0	0	0	0	0	0	0	0	0	0	0	0.00017102	0	0	0	0	0	0
189						VPS29		12	3.1.3.3	[34..211]	[MPP_Vps29]	[Homo sapiens Vps29 and related proteins, metallophosphatase domain; cd07394]	[order(40,42,71,94,118,147,149)][order(40,42,71,94,118,147,149)][order(40,42,46,71,94..95,118,123,147)]	[active][metal-binding][other]	[][metal binding site [ion binding]][Vps29:Vps35 subcomplex [polypeptide binding]]				4	NP_001269079.1;NP_001269080.1;NP_057310.1;NP_476528.1	373	NP_001269079.1	0 genes:. 4 proteins in this group did not match any genes. NP_001269079.1:vacuolar protein sorting-associated protein 29 isoform 3 [Homo sapiens] ;NP_001269080.1:vacuolar protein sorting-associated protein 29 isoform 4 [Homo sapiens] ;NP_057310.1:vacuolar protein sorting-associated protein 29 isoform 1 [Homo sapiens] ;NP_476528.1:vacuolar protein sorting-associated protein 29 isoform 2 [Homo sap…	0	0	0	0	0	0	0	0	0	0	0	0.00098229	0	0	0	0	0	0	0	0	0	0	0	0	0	0
190						ZCCHC17		1		[45..108]	[S1_pNO40]	[S1_pNO40: pNO40, S1-like RNA-binding domain. pNO40 is a nucleolar protein of unknown function with an N-terminal S1 RNA binding domain, a CCHC type zinc finger, and clusters of basic amino acids representing a potential nucleolar targeting signal; cd05686]	[order(46,54,65,67)]	[other]	[RNA binding site [nucleotide binding]]				7	NP_001269495.1;NP_001269496.1;NP_001269498.1;NP_001269499.1;NP_001269500.1;NP_001269503.1;NP_057589.2	376	NP_001269495.1	0 genes:. 7 proteins in this group did not match any genes. NP_001269495.1:nucleolar protein of 40 kDa isoform a [Homo sapiens] ;NP_001269496.1:nucleolar protein of 40 kDa isoform b [Homo sapiens] ;NP_001269498.1:nucleolar protein of 40 kDa isoform d [Homo sapiens] ;NP_001269499.1:nucleolar protein of 40 kDa isoform e [Homo sapiens] ;NP_001269500.1:nucleolar protein of 40 kDa isoform f [Homo sapi…	0	0	0	0	0	0	0	0	0	0	0	0	0	0	0	0	0	0	0	0	0	0	0.00011701	0	0	0
191	o	22	0.118	Q	22	MRPS21		1		[10..66]	[S21p]	[ribosomal protein S21; TIGR00030]							1	NP_114107.1	379	NP_114107.1	28S ribosomal protein S21, mitochondrial [Homo sapiens]	0	0	0	0	0	0.00251897	0	0	0	0	0	0	0	0	0	0	0	0	0	0	0	0	0	0	0	0
192	o	3	0.088	Q	21	THYN1		11		[5..10][57..>160]	[Nuclear localization signal. {ECO:0000250}][EVE]	[propagated from UniProtKB/Swiss-Prot (Q9P016.1)][EVE domain; cl00728]							2	NP_954994.1;NP_954995.1	380	NP_954994.1	0 genes:. 2 proteins in this group did not match any genes. NP_954994.1:thymocyte nuclear protein 1 isoform 2 [Homo sapiens] ;NP_954995.1:thymocyte nuclear protein 1 isoform 1 [Homo sapiens] ;	0	0	0	0	0	0	0	0	0	0	0	0	0	0	0	0	0	0	0	0	0	0	0.00018539	0	0	0
194						HNRNPH3		10		[1..93][18..87][189..263][191..258]	[RRM2_hnRNPH3][RRM_6][RRM3_hnRNPH3][RRM_6]	[RNA recognition motif 2 in heterogeneous nuclear ribonucleoprotein H3 (hnRNP H3) and similar proteins; cd12732][RNA recognition motif (a.k.a. RRM, RBD, or RNP domain); pfam14259][RNA recognition motif 3 in heterogeneous nuclear ribonucleoprotein H3 (hnRNP H3) and similar proteins; cd12735][RNA recognition motif (a.k.a. RRM, RBD, or RNP domain); pfam14259]	[1][121][210][281][290][292][308]	[acetylation][methylation][phosphorylation][methylation][phosphorylation][phosphorylation][phosphorylation]	[N-acetylmethionine. {ECO:0000269|Ref.7}; propagated from UniProtKB/Swiss-Prot (P31942.2)][Asymmetric dimethylarginine. {ECO:0000269|PubMed:11152131}; propagated from UniProtKB/Swiss-Prot (P31942.2)][Phosphoserine. {ECO:0000244|PubMed:17081983, ECO:0000244|PubMed:18669648, ECO:0000244|PubMed:18691976, ECO:0000244|PubMed:19369195, ECO:0000244|PubMed:19690332, ECO:0000244|PubMed:20068231, ECO:00002…				3	NP_001309372.1;NP_036339.1;NP_067676.2	382	NP_001309372.1	0 genes:. 3 proteins in this group did not match any genes. NP_001309372.1:heterogeneous nuclear ribonucleoprotein H3 isoform c [Homo sapiens] ;NP_036339.1:heterogeneous nuclear ribonucleoprotein H3 isoform a [Homo sapiens] ;NP_067676.2:heterogeneous nuclear ribonucleoprotein H3 isoform b [Homo sapiens] ;	0	0	0	0	0	0	0	0	0	0	0	0	0	0	0	0	0	0	0	0	0	0.00016818	0.00045257	0	0	0
195						RBBP4		1		[17..88][121..402][121..154][<161..>407][174..205][224..255][270..301][314..345][371..402]	[CAF1C_H4-bd][WD40][WD 1][WD40][WD 2][WD 3][WD 4][WD 5][WD 6]	[Histone-binding protein RBBP4 or subunit C of CAF1 complex; pfam12265][WD40 domain, found in a number of eukaryotic proteins that cover a wide variety of functions including adaptor/regulatory modules in signal transduction, pre-mRNA processing and cytoskeleton assembly; typically contains a GH dipeptide 11-24 residues from...; cl02567][propagated from UniProtKB/Swiss-Prot (Q09028.3)][WD40 repea…	[2][4][109][order(121..122,140,147,151..152,174..175,198,204..205,225,]	[acetylation][acetylation][phosphorylation][other]	[N-acetylalanine; propagated from UniProtKB/Swiss-Prot (Q09028.3)][N6-acetyllysine, alternate; propagated from UniProtKB/Swiss-Prot (Q09028.3)][Phosphoserine; propagated from UniProtKB/Swiss-Prot (Q09028.3)][structural tetrad]				1	NP_001128727.1	383	NP_001128727.1	histone-binding protein RBBP4 isoform b [Homo sapiens]	0	0	0	0	0	0.00051686	0	0.00128361	0	0.0017308	0	0.00024789	0	0	0	0	0	0	0	0.00014642	0	0	0	0	0	0
196	o	8	0.048	Q	19	MEA1		6		[1..172]	[MEA1]	[Male enhanced antigen 1 (MEA1); pfam06910]							2	NP_001305872.1;NP_055438.1	384	NP_001305872.1	0 genes:. 2 proteins in this group did not match any genes. NP_001305872.1:male-enhanced antigen 1 isoform 2 [Homo sapiens] ;NP_055438.1:male-enhanced antigen 1 isoform 1 [Homo sapiens] ;	0	0	0	0	0	0	0	0	0	0	0	0	0	0	0	0	0	0	0	0.00072187	0	0	0	0	0	0
197						BCOR		X		[1405..1513][1415..1506][1580..1694]	[ANK][Ank_2][PUFD]	[ankyrin repeats; ankyrin repeats mediate protein-protein interactions in very diverse families of proteins. The number of ANK repeats in a protein can range from 2 to over 20 (ankyrins, for example). ANK repeats may occur in combinations with other...; cd00204][Ankyrin repeats (3 copies); pfam12796][PCGF Ub-like fold discriminator of BCOR; cd14261]	[order(1584..1585,1587..1591,1593..1595,1597,1599,1608,]	[other]	[RAWUL domain interface [polypeptide binding]]				3	NP_001116856.1;NP_001116857.1;NP_060215.4	385	NP_001116856.1	0 genes:. 3 proteins in this group did not match any genes. NP_001116856.1:BCL-6 corepressor isoform b [Homo sapiens] ;NP_001116857.1:BCL-6 corepressor isoform c [Homo sapiens] ;NP_060215.4:BCL-6 corepressor isoform a [Homo sapiens] ;	0	0	0	0	0	0	0	0	0	0	0	0	0	0	0	0	0	0	0	3.645e-05	0	0	0	0	0	0
198						PYCR2		1	1.5.1.2	[1..194][3..98][108..194]	[PLN02688][F420_oxidored][P5CR_dimer]	[pyrroline-5-carboxylate reductase][NADP oxidoreductase coenzyme F420-dependent; pfam03807][Pyrroline-5-carboxylate reductase dimerization; pfam14748]							2	NP_001258610.1;NP_037460.2	387	NP_001258610.1	0 genes:. 2 proteins in this group did not match any genes. NP_001258610.1:pyrroline-5-carboxylate reductase 2 isoform 2 [Homo sapiens] ;NP_037460.2:pyrroline-5-carboxylate reductase 2 isoform 1 [Homo sapiens] ;	0	0	0	0	0	0.00089086	0	0.0026221	0	0.0017899	0	0	0	0	0	0.00170606	0	0	0	0	0	0	0	0	0	0
199	o	19	0.036	Q	16	TUBB6		18		[1..432][2..426]	[PLN00220][beta_tubulin]	[tubulin beta chain; Provisional][The beta-tubulin family; cd02187]	[order(2,131,245..247,251,256,258..260,322..324,327,][order(10..12,15,138,140..144,181,204,222,226)][order(22..23,26..27,215,224,227..228,234,270,272..274,][40][56][58][58][order(70..71,98..100,103,179,181,222)][172][318]	[other][other][other][phosphorylation][phosphorylation][acetylation][modified][other][phosphorylation][methylation]	[beta/alpha domain interface [polypeptide binding]][nucleotide binding site [chemical binding]][Taxol binding site [chemical binding]][Phosphoserine. {ECO:0000250|UniProtKB:P99024}; propagated from UniProtKB/Swiss-Prot (Q9BUF5.1)][][N6-acetyllysine, alternate. {ECO:0000250|UniProtKB:P07437}; propagated from UniProtKB/Swiss-Prot (Q9BUF5.1)][N6-succinyllysine, alternate. {ECO:0000250|UniProtKB:P990…				1	NP_115914.1	390	NP_115914.1	tubulin beta-6 chain isoform 1 [Homo sapiens]	0	0	0	0	0.00100226	0	0	0.00012052	0.00062761	0.00081562	0.00219335	0	0	0	0	0	0	0	0	0	0	0	0	0	0	0
200						ECT2		3		[178..248][273..342][378..382][401..405][453..639][631..804]	[BRCT][BRCT][Nuclear localization signal][Nuclear localization signal][RhoGEF][PH_Ect2]	[Breast Cancer Suppressor Protein (BRCA1), carboxy-terminal domain. The BRCT domain is found within many DNA damage repair and cell cycle checkpoint proteins. The unique diversity of this domain superfamily allows BRCT modules to interact forming homo...; cd00027][Breast Cancer Suppressor Protein (BRCA1), carboxy-terminal domain. The BRCT domain is found within many DNA damage repair and cell cyc…	[2][order(193,197,200,203,205)][order(242,246)][order(287,291,294,297,299)][order(336,340)][359][367][370][373][376][444][order(459,463,562,590..591,594..595,597..598,601..602,][842][846]	[acetylation][other][other][other][other][phosphorylation][phosphorylation][phosphorylation][phosphorylation][phosphorylation][phosphorylation][other][phosphorylation][phosphorylation]	[N-acetylalanine; propagated from UniProtKB/Swiss-Prot (Q9H8V3.4)][Dimer interface [polypeptide binding]][BRCT sequence motif][Dimer interface [polypeptide binding]][BRCT sequence motif][Phosphothreonine, by PKC/PRKCI; propagated from UniProtKB/Swiss-Prot (Q9H8V3.4)][Phosphoserine; propagated from UniProtKB/Swiss-Prot (Q9H8V3.4)][Phosphoserine; propagated from UniProtKB/Swiss-Prot (Q9H8V3.4)][Pho…				2	NP_001245244.1;NP_060568.3	392	NP_001245244.1	0 genes:. 2 proteins in this group did not match any genes. NP_001245244.1:protein ECT2 isoform a [Homo sapiens] ;NP_060568.3:protein ECT2 isoform b [Homo sapiens] ;	0	0	0	0	0	0	0	0	0	0	0	0	0.0295001	0	0	0	0	0	0	0	0	0	0	0	0	0
201	o	17	0.277	S	18	PDHA1		X	1.2.4.1	[64..353]	[TPP_E1_PDC_ADC_BCADC]	[Thiamine pyrophosphate (TPP) family, E1 of PDC_ADC_BCADC subfamily, TPP-binding module; composed of proteins similar to the E1 components of the human pyruvate dehydrogenase complex (PDC), the acetoin dehydrogenase complex (ADC) and the branched chain...; cd02000]	[63][63][order(88,140,165..166,197,199..202,205,209,213,228..231,][order(118..119,165,167,195..198,225,227,292)][order(160,162,164,169,172..173,176..177,179..180,183,][232][232][232][232][232][244][244][277][order(287..293,295..305,314..316)][293][293][293][293][293][293][295][300][300][300][300][300][301][301][313][313][321][336][369][385]	[acetylation][modified][other][other][other][phosphorylation][phosphorylation][phosphorylation][modified][phosphorylation][acetylation][modified][modified][phosphorylation][phosphorylation][phosphorylation][phosphorylation][phosphorylation][modified][phosphorylation][phosphorylation][phosphorylation][phosphorylation][phosphorylation][modified][phosphorylation][phosphorylation][phosphorylation][ac…	[N6-acetyllysine, alternate. {ECO:0000250|UniProtKB:P35486}; propagated from UniProtKB/Swiss-Prot (P08559.3)][N6-succinyllysine, alternate. {ECO:0000250|UniProtKB:P35486}; propagated from UniProtKB/Swiss-Prot (P08559.3)][tetramer interface [polypeptide binding]][TPP-binding site [chemical binding]][heterodimer interface [polypeptide binding]][][][][dephosphorylation site][Phosphoserine, by PDK1. …				5	NP_000275.1;NP_001166925.1;NP_001166926.1;NP_001166927.1;NP_005381.1	393	NP_000275.1	0 genes:. 5 proteins in this group did not match any genes. NP_000275.1:pyruvate dehydrogenase E1 component subunit alpha, somatic form, mitochondrial isoform 1 precursor [Homo sapiens] ;NP_001166925.1:pyruvate dehydrogenase E1 component subunit alpha, somatic form, mitochondrial isoform 2 precursor [Homo sapiens] ;NP_001166926.1:pyruvate dehydrogenase E1 component subunit alpha, somatic form, mi…	0	0	0	0	0	0	0	0	0	0	0	0	0	0	0	0	0	0	0	0	0	0	0.00015782	0	0	0
202	o	11	0.23	Q	19	PPIL4		6	5.2.1.8	[4..161][237..319][241..313]	[cyclophilin_RRM][RRM_PPIL4][RRM]	[cyclophilin_RRM: cyclophilin-type peptidylprolyl cis- trans isomerase domain occuring with a C-terminal RNA recognition motif domain (RRM). This subfamily of the cyclophilin domain family contains a number of eukaryotic cyclophilins having the RRM domain...; cd01921][RNA recognition motif in peptidyl-prolyl cis-trans isomerase-like 4 (PPIase) and similar proteins; cd12235][RNA recognition motif;…	[order(43..44,49,107,109,118)][178][178][182][393]	[active][phosphorylation][phosphorylation][phosphorylation][phosphorylation]	[][][Phosphoserine. {ECO:0000244|PubMed:17081983, ECO:0000244|PubMed:18220336, ECO:0000244|PubMed:18669648, ECO:0000244|PubMed:19690332, ECO:0000244|PubMed:20068231, ECO:0000244|PubMed:21406692}; propagated from UniProtKB/Swiss-Prot (Q8WUA2.1)][Phosphothreonine. {ECO:0000244|PubMed:24275569}; propagated from UniProtKB/Swiss-Prot (Q8WUA2.1)][Phosphoserine. {ECO:0000250|UniProtKB:Q9CXG3}; propagate…				1	NP_624311.1	394	NP_624311.1	peptidyl-prolyl cis-trans isomerase-like 4 [Homo sapiens]	0	0	0	0	0	0	0	0	0	0	0	0	0	0	0	0	0	0	0	0.00050472	0	0	0	0	0	0
203	o	31	0.038	Q	19	PRC1		15		[1..341][37..615][260..>411][342..466][467..620]	[Dimerization][MAP65_ASE1][Glyco_hydro_77][Spectrin-fold][Unstructured, Arg/Lys rich]	[propagated from UniProtKB/Swiss-Prot (O43663.2)][Microtubule associated protein (MAP65/ASE1 family); pfam03999][4-alpha-glucanotransferase; cl00711][propagated from UniProtKB/Swiss-Prot (O43663.2)][propagated from UniProtKB/Swiss-Prot (O43663.2)]	[191][195][195][265][470][470][481][481][501][513][571][592][592][615][616]	[phosphorylation][phosphorylation][phosphorylation][phosphorylation][phosphorylation][phosphorylation][phosphorylation][phosphorylation][phosphorylation][phosphorylation][phosphorylation][phosphorylation][phosphorylation][phosphorylation][phosphorylation]	[][][Phosphoserine. {ECO:0000269|PubMed:9885575}; propagated from UniProtKB/Swiss-Prot (O43663.2)][Phosphoserine. {ECO:0000269|PubMed:9885575}; propagated from UniProtKB/Swiss-Prot (O43663.2)][][Phosphothreonine, by CDK1. {ECO:0000269|PubMed:17351640, ECO:0000269|PubMed:17438553, ECO:0000269|PubMed:9885575}; propagated from UniProtKB/Swiss-Prot (O43663.2)][][Phosphothreonine, by CDK1. {ECO:000026…				2	NP_003972.1;NP_955445.1	396	NP_003972.1	0 genes:. 2 proteins in this group did not match any genes. NP_003972.1:protein regulator of cytokinesis 1 isoform 1 [Homo sapiens] ;NP_955445.1:protein regulator of cytokinesis 1 isoform 2 [Homo sapiens] ;	0	0	0	0	0	0	0	0	0	0	0	0	0	0	0	0	0	0	0	0	0	0.00027669	9.927e-05	0	0	0
204	o	24	0.06	Q	24	RCC2		1		[103..165][150..181][168..219][168..217][221..271][221..269][272..345][273..347][348..401][350..399][403..447][448..501]	[RCC1 1][RCC1_2][RCC1 2][RCC1][RCC1 3][RCC1][RCC1][RCC1 4][RCC1 5][RCC1][RCC1 6][RCC1 7]	[propagated from UniProtKB/Swiss-Prot (Q9P258.2)][Regulator of chromosome condensation (RCC1) repeat; pfam13540][propagated from UniProtKB/Swiss-Prot (Q9P258.2)][Regulator of chromosome condensation (RCC1) repeat; pfam00415][propagated from UniProtKB/Swiss-Prot (Q9P258.2)][Regulator of chromosome condensation (RCC1) repeat; pfam00415][Regulator of chromosome condensation (RCC1) repeat; pfam00415]…	[16][43][43][44][44][45][45][46][46][50][50][51][51][92][124][293][342][347][377]	[phosphorylation][phosphorylation][phosphorylation][phosphorylation][phosphorylation][phosphorylation][phosphorylation][phosphorylation][phosphorylation][phosphorylation][phosphorylation][phosphorylation][phosphorylation][acetylation][acetylation][acetylation][phosphorylation][phosphorylation][acetylation]	[Phosphoserine. {ECO:0000244|PubMed:19690332}; propagated from UniProtKB/Swiss-Prot (Q9P258.2)][][Phosphoserine. {ECO:0000244|PubMed:17081983}; propagated from UniProtKB/Swiss-Prot (Q9P258.2)][][Phosphoserine. {ECO:0000244|PubMed:17081983}; propagated from UniProtKB/Swiss-Prot (Q9P258.2)][][Phosphoserine. {ECO:0000244|PubMed:17081983}; propagated from UniProtKB/Swiss-Prot (Q9P258.2)][][Phosphoser…				1	NP_061185.1	397	NP_061185.1	protein RCC2 [Homo sapiens]	0	0	0	0	0	0	0	0.00030893	0	0	0	0	0	0	0	0	0	0	0	0.0104657	0.0240784	0.00306727	0.00135597	0.00159973	0.00104012	0
205	o	19	0.82	S	19	APOA1		11		[68..267][92..258]	[10 X approximate tandem repeats][Apolipoprotein]	[propagated from UniProtKB/Swiss-Prot (P02647.1)][Apolipoprotein A1/A4/E domain; pfam01442]	[110][136]	[sulfatation][sulfatation]	[Methionine sulfoxide. {ECO:0000269|PubMed:12576517}; propagated from UniProtKB/Swiss-Prot (P02647.1)][Methionine sulfoxide. {ECO:0000269|PubMed:12576517}; propagated from UniProtKB/Swiss-Prot (P02647.1)]				1	NP_001304947.1	398	NP_001304947.1	apolipoprotein A-I isoform 1 preproprotein [Homo sapiens]	0	0	0	0	0	0	0	0	0	0	0	0	0	0	0	0	0	0	0	0.00046502	0	0	0	0	0	0
206	o	22	0.101	Q	17	DNAJC9		10		[15..71]	[DnaJ]	[DnaJ domain or J-domain. DnaJ/Hsp40 (heat shock protein 40) proteins are highly conserved and play crucial roles in protein translation, folding, unfolding, translocation, and degradation. They act primarily by stimulating the ATPase activity of Hsp70s; cd06257]	[order(43..45,56,59..60,63..64)][109]	[other][phosphorylation]	[HSP70 interaction site [polypeptide binding]][Phosphoserine. {ECO:0000244|PubMed:19690332, ECO:0000244|PubMed:20068231, ECO:0000244|PubMed:24275569}; propagated from UniProtKB/Swiss-Prot (Q8WXX5.1)]				1	NP_056005.1	402	NP_056005.1	dnaJ homolog subfamily C member 9 [Homo sapiens]	0	0	0	0	0	0	0	0	0	0	0	0	0	0	0	0	0	0	0	0.00023877	0.00092965	0.00021993	0.00011836	0	0	0
207	o	39	0.038	Q	0	PA2G4		12		[18..334][23][46..54][301..394][361..375]	[PA2G4-like][alternative start site][RNA-binding. {ECO:0000269|PubMed:15064750}][Necessary for nucleolar localization. {ECO:0000269|PubMed:15064750}][Interaction with RNA. {ECO:0000250|UniProtKB:P50580}]	[Related to aminopepdidase M, this family contains proliferation-associated protein 2G4. Family members have been implicated in cell cycle control; cd01089][][propagated from UniProtKB/Swiss-Prot (Q9UQ80.3)][propagated from UniProtKB/Swiss-Prot (Q9UQ80.3)][propagated from UniProtKB/Swiss-Prot (Q9UQ80.3)]	[2][2][2][19][order(88,109,120,234,303,320)][361][363][363][363][366][366][366][366][386][386]	[phosphorylation][acetylation][phosphorylation][phosphorylation][active][phosphorylation][phosphorylation][phosphorylation][phosphorylation][phosphorylation][phosphorylation][phosphorylation][phosphorylation][phosphorylation][phosphorylation]	[][N-acetylserine. {ECO:0000244|PubMed:19413330, ECO:0000244|PubMed:20068231, ECO:0000244|PubMed:21406692, ECO:0000244|PubMed:22223895, ECO:0000244|PubMed:22814378, ECO:0000269|Ref.5}; propagated from UniProtKB/Swiss-Prot (Q9UQ80.3)][Phosphoserine. {ECO:0000244|PubMed:17081983, ECO:0000244|PubMed:20068231, ECO:0000244|PubMed:21406692}; propagated from UniProtKB/Swiss-Prot (Q9UQ80.3)][][][Phosphos…				1	NP_006182.2	405	NP_006182.2	proliferation-associated protein 2G4 [Homo sapiens]	0	0	0	0	0	0	0	0	0	0	0	0	0	0	0	0	0	0	0	0.00094539	0.0055213	0	0	0	0	0
208						TCEB3		1		[<63..102][548..707][576..585][592..695]	[TFIIS_I][Activation domain. {ECO:0000250}][Interacting with Elongin BC complex][Elongin_A]	[N-terminal domain (domain I) of transcription elongation factor S-II (TFIIS); similar to a domain found in elongin A and CRSP70; likely to be involved in transcription; domain I from TFIIS interacts with RNA polymerase II holoenzyme; cd00183][propagated from UniProtKB/Swiss-Prot (Q14241.2)][propagated from UniProtKB/Swiss-Prot (Q14241.2)][RNA polymerase II transcription factor SIII (Elongin) sub…	[222][410][413][420][460]	[phosphorylation][phosphorylation][phosphorylation][phosphorylation][acetylation]	[Phosphoserine. {ECO:0000250|UniProtKB:Q63187}; propagated from UniProtKB/Swiss-Prot (Q14241.2)][Phosphoserine. {ECO:0000244|PubMed:19690332, ECO:0000244|PubMed:20068231}; propagated from UniProtKB/Swiss-Prot (Q14241.2)][Phosphoserine. {ECO:0000244|PubMed:20068231}; propagated from UniProtKB/Swiss-Prot (Q14241.2)][Phosphothreonine. {ECO:0000244|PubMed:19690332}; propagated from UniProtKB/Swiss-Pr…				1	NP_003189.2	409	NP_003189.2	transcription elongation factor B polypeptide 3 [Homo sapiens]	0	0	0	0	0	0	0	0	0	0	0	0	0	0	0	0	0	0	0	7.78e-05	0	0.00035829	3.856e-05	0	0	0
209						LRWD1		7		[<156..429][<157..432]	[WD40][WD40]	[WD40 domain, found in a number of eukaryotic proteins that cover a wide variety of functions including adaptor/regulatory modules in signal transduction, pre-mRNA processing and cytoskeleton assembly; typically contains a GH dipeptide 11-24 residues from...; cl02567][WD40 repeat [General function prediction only]; COG2319]	[order(163,167,173,185..186,214,219,225..226,239,257,262,]	[other]	[structural tetrad]				2	NP_001304650.1;NP_690852.1	410	NP_001304650.1	0 genes:. 2 proteins in this group did not match any genes. NP_001304650.1:leucine-rich repeat and WD repeat-containing protein 1 isoform 2 [Homo sapiens] ;NP_690852.1:leucine-rich repeat and WD repeat-containing protein 1 isoform 1 [Homo sapiens] ;	0	0	0	0	0	0	0	0	0	0	0	0	0	0	0	0.00169572	0	0	0	0	0	0	0	0	0	0
210	o	16	0.126	Q	23	DSP		6		[1..1056][1..584][190..366][285..450][1057..1945][1058..1945][1570..1714][1946..2871][1960..2208][2048..2090][2084..2121][2122..2166][2244..2446][2253..2295][2289..2333][2328..2364][2365..2409][<2468..2500][2609..2822][2611..2647][2648..2692][2724..2768][2762..2799][2824..2847]	[Globular 1][Interacts with plakophilin 1 and junction plakoglobin][SPEC][SPEC][Central fibrous rod domain][Myosin_tail_1][CENP-F_leu_zip][Globular 2][4.5 X 38 AA tandem repeats (Domain A)][Plectin][PLEC][Plectin][4.5 X 38 AA tandem repeats (Domain B)][Plectin][Plectin][PLEC][Plectin][Plectin][4.5 X 38 AA tandem repeats (Domain C)][PLEC][Plectin][Plectin][PLEC][6 X 4 AA tandem repeats of G-S-R-[S…	[propagated from UniProtKB/Swiss-Prot (P15924.3)][propagated from UniProtKB/Swiss-Prot (P15924.3)][Spectrin repeats, found in several proteins involved in cytoskeletal structure; family members include spectrin, alpha-actinin and dystrophin; the spectrin repeat forms a three helix bundle with the second helix interrupted by proline in some sequences; cl02488][Spectrin repeats, found in several pr…	[22][22][28][53][56][56][61][165][166][176][176][270..274][375..380][1708][2024][2024][2207][2209][2209][2209][2225][2275][2339][2815][2815][2820][2820][2821][2825][2825][2849][2849][2853][2868]	[phosphorylation][phosphorylation][phosphorylation][phosphorylation][phosphorylation][phosphorylation][phosphorylation][phosphorylation][phosphorylation][phosphorylation][phosphorylation][other][other][phosphorylation][phosphorylation][phosphorylation][phosphorylation][phosphorylation][phosphorylation][phosphorylation][phosphorylation][phosphorylation][phosphorylation][phosphorylation][phosphoryl…	[][Phosphoserine. {ECO:0000244|PubMed:21406692, ECO:0000244|PubMed:24275569}; propagated from UniProtKB/Swiss-Prot (P15924.3)][][Phosphoserine. {ECO:0000244|PubMed:24275569}; propagated from UniProtKB/Swiss-Prot (P15924.3)][][Phosphotyrosine. {ECO:0000250|UniProtKB:E9Q557}; propagated from UniProtKB/Swiss-Prot (P15924.3)][Phosphothreonine. {ECO:0000250|UniProtKB:E9Q557}; propagated from UniProtKB…				1	NP_004406.2	411	NP_004406.2	desmoplakin isoform I [Homo sapiens]	0.00078617	0	0	0.00153483	0	0.00083966	0	0.00112337	0	0.00053678	0	0.00014644	0	0	0	0.00014618	0	0	0	0.00034597	0	0	0	0	0	0
211	o290-312i319-341o366-388i409-426o436-458i486-508o523-545i595-617o652-674i681-698o713-730i732-751o	31	0.078	Q	29	SLC12A2		5		[201..267][216..1212]	[AA_permease_N][2a30]	[Amino acid permease N-terminal; pfam08403][K-Cl cotransporter; TIGR00930]	[1][77][79][203][207][212][266][286..306][319..341][367..387][411..431][436..456][487..507][521..541][592..612][655..675][681..699][725..745][900..920][940][940][944][994]	[acetylation][phosphorylation][phosphorylation][phosphorylation][phosphorylation][phosphorylation][phosphorylation][transmembrane region][transmembrane region][transmembrane region][transmembrane region][transmembrane region][transmembrane region][transmembrane region][transmembrane region][transmembrane region][transmembrane region][transmembrane region][transmembrane region][phosphorylation][ph…	[N-acetylmethionine. {ECO:0000244|PubMed:22223895}; propagated from UniProtKB/Swiss-Prot (P55011.1)][Phosphoserine. {ECO:0000244|PubMed:18669648}; propagated from UniProtKB/Swiss-Prot (P55011.1)][Phosphoserine. {ECO:0000244|PubMed:18669648}; propagated from UniProtKB/Swiss-Prot (P55011.1)][][][][Phosphothreonine. {ECO:0000250|UniProtKB:P55012}; propagated from UniProtKB/Swiss-Prot (P55011.1)][pro…				2	NP_001037.1;NP_001243390.1	412	NP_001037.1	0 genes:. 2 proteins in this group did not match any genes. NP_001037.1:solute carrier family 12 member 2 isoform 1 [Homo sapiens] ;NP_001243390.1:solute carrier family 12 member 2 isoform 2 [Homo sapiens] ;	0	0	0	0	0	0	0	0	0.00069285	0.00018165	0	0	0	0	0	0	0	0	0	0.00035855	0	0	0	0	0	0
212	o228-250i262-284o316-338i351-373o399-421i442-464o503-525i	21	0.662	S	21	FZD10		12		[30..156][217..535][526..531][579..581]	[CRD_FZ10][Frizzled][Lys-Thr-X-X-X-Trp motif, mediates interaction with the PDZ domain of Dvl family members (By similarity)][PDZ-binding]	[Cysteine-rich Wnt-binding domain (CRD) of the frizzled 10 (Fz10) receptor; cd07462][Frizzled/Smoothened family membrane region; pfam01534][propagated from UniProtKB/Swiss-Prot (Q9ULW2.1)][propagated from UniProtKB/Swiss-Prot (Q9ULW2.1)]	[order(41,43..45,47..49)][226..246][263..283][312..332][352..372][394..414][444..464][503..523]	[other][transmembrane region][transmembrane region][transmembrane region][transmembrane region][transmembrane region][transmembrane region][transmembrane region]	[putative Wnt binding site [polypeptide binding]][propagated from UniProtKB/Swiss-Prot (Q9ULW2.1)][propagated from UniProtKB/Swiss-Prot (Q9ULW2.1)][propagated from UniProtKB/Swiss-Prot (Q9ULW2.1)][propagated from UniProtKB/Swiss-Prot (Q9ULW2.1)][propagated from UniProtKB/Swiss-Prot (Q9ULW2.1)][propagated from UniProtKB/Swiss-Prot (Q9ULW2.1)][propagated from UniProtKB/Swiss-Prot (Q9ULW2.1)]				1	NP_009128.1	413	NP_009128.1	frizzled-10 precursor [Homo sapiens]	0	0	0	0	0	0	0	0	0	0	0	0	0	0	0	0	0	0	0	0	0	0	0.00010594	0	0	0
213	o	20	0.889	S	20	TF		3		[24..346][25..347][358..682][361..683]	[PBP2_transferrin_N][Transferrin][PBP2_transferrin_C][TR_FER]	[The N-lobe of transferrin, a member of the type 2 periplasmic binding protein fold superfamily; cd13618][Transferrin; pfam00405][The C-lobe of transferrin, a member of the type 2 periplasmic binding protein fold superfamily; cd13617][Transferrin; smart00094]	[42][order(82,114,139,143..146,207,268)][389][order(411,445,471,475..478,536,604)][432][536][630][685]	[methylation][active][phosphorylation][active][glycosylation][phosphorylation][glycosylation][phosphorylation]	[Dimethylated arginine. {ECO:0000250|UniProtKB:P12346}; propagated from UniProtKB/Swiss-Prot (P02787.3)][][Phosphoserine, by FAM20C. {ECO:0000269|PubMed:26091039}; propagated from UniProtKB/Swiss-Prot (P02787.3)][][][][][Phosphoserine, by FAM20C. {ECO:0000269|PubMed:26091039}; propagated from UniProtKB/Swiss-Prot (P02787.3)]				1	NP_001054.1	414	NP_001054.1	serotransferrin precursor [Homo sapiens]	0	0	0	0	0.00192123	0.00219778	0	0.00115515	0.00240613	0.00063082	0	0.00060232	0	0	0	0	0	0	0	0.00222352	0	0	8.818e-05	0	0	0
214	o	37	0.047	Q	37	WDR70		5		[165..>492][177..498][180..219][227..268][281..321][330..369][376..415][421..466][469..508]	[WD40][WD40][WD 1][WD 2][WD 3][WD 4][WD 5][WD 6][WD 7]	[WD40 repeat [General function prediction only]; COG2319][WD40 domain, found in a number of eukaryotic proteins that cover a wide variety of functions including adaptor/regulatory modules in signal transduction, pre-mRNA processing and cytoskeleton assembly; typically contains a GH dipeptide 11-24 residues from...; cl02567][propagated from UniProtKB/Swiss-Prot (Q9NW82.1)][propagated from UniProtK…	[order(181,199,203,209..210,226,230,246,250,256..257,269,][452][621][638][638]	[other][acetylation][phosphorylation][phosphorylation][phosphorylation]	[structural tetrad][N6-acetyllysine; propagated from UniProtKB/Swiss-Prot (Q9NW82.1)][Phosphoserine; propagated from UniProtKB/Swiss-Prot (Q9NW82.1)][][Phosphoserine; propagated from UniProtKB/Swiss-Prot (Q9NW82.1)]				1	NP_060504.1	416	NP_060504.1	WD repeat-containing protein 70 [Homo sapiens]	0	0	0	0	0	0	0	0	0	0	0	0	0	0	0	0	0	0	0	9.492e-05	0	8.744e-05	9.411e-05	0	0	0
215	o	26	0.407	S	41	IDH3B		20	1.1.1.41	[47..380]	[Iso_dh]	[Isocitrate/isopropylmalate dehydrogenase; cl00445]	[171][199][218]	[other][acetylation][other]	[Critical for catalysis. {ECO:0000250}; propagated from UniProtKB/Swiss-Prot (O43837.2)][N6-acetyllysine. {ECO:0000244|PubMed:19608861}; propagated from UniProtKB/Swiss-Prot (O43837.2)][Critical for catalysis. {ECO:0000250}; propagated from UniProtKB/Swiss-Prot (O43837.2)]				1	NP_008830.2	418	NP_008830.2	isocitrate dehydrogenase [NAD] subunit beta, mitochondrial isoform a precursor [Homo sapiens]	0	0	0	0	0.00174159	0	0	0.00167542	0.00436228	0.00228735	0	0	0	0	0	0	0	0	0	0	0	0.00029705	0	0	0	0
216	o	24	0.872	S	24	GM2A		5		[32..193]	[GM2-AP]	[GM2 activator protein (GM2-AP) is a non-enzymatic lysosomal protein that acts as cofactor in the sequential degradation of gangliosides. GM2A is an essential cofactor for beta-hexosaminidase A (Hex A) in the enzymatic hydrolysis of GM2 ganglioside to GM3; cd00258]	[order(34,36,46,48,51,53,58,64,66,68,82,84,86,103,108,111,]	[other]	[putative lipid binding cavity [chemical binding]]				1	NP_000396.2	420	NP_000396.2	ganglioside GM2 activator isoform 1 precursor [Homo sapiens]	0	0	0	0	0	0	0	0	0	0	0	0	0	0	0	0	0	0	0	0	0	0	0.00031891	0	0	0
217	o	40	0.071	Q	21	PABPC4		1		[11..640][12..91][97..172][190..269][293..370][569..639]	[PABP-1234][RRM1_I_PABPs][RRM2_I_PABPs][RRM3_I_PABPs][RRM4_I_PABPs][PABP]	[polyadenylate binding protein, human types 1, 2, 3, 4 family; TIGR01628][RNA recognition motif 1 in type I polyadenylate-binding proteins; cd12378][RNA recognition motif 2 found in type I polyadenylate-binding proteins; cd12379][RNA recognition motif 3 found in type I polyadenylate-binding proteins; cd12380][RNA recognition motif 4 in type I polyadenylate-binding proteins; cd12381][Poly-adenylat…	[order(12,14,24,41..42,44..46,49,52,54,56,58,83,85..89)][order(23..25,28,40,44,46..50,89,91)][order(100,102,104..105,127,138..140,142,144,169,172)]	[other][other][other]	[RNA binding site [nucleotide binding]][oligomer interface [polypeptide binding]][RNA binding site [nucleotide binding]]				1	NP_001129125.1	422	NP_001129125.1	polyadenylate-binding protein 4 isoform 1 [Homo sapiens]	0	0	0	0	0	0	0	0	0	0	0	0.00058392	0	0	0	0	0	0	0	0	0	0	0	0	0	0
218	o	31	0.066	Q	31	MEIS3		19		[247..302]	[homeodomain]	[Homeodomain; DNA binding domains involved in the transcriptional regulation of key eukaryotic developmental processes; may bind to DNA as monomers or as homo- and/or heterodimers, in a sequence-specific manner; cd00086]	[order(247..250,252,272,278,291,293..294,297..298,300..302)][order(248,251,294,297..298,301)]	[DNA binding][other]	[DNA binding site [nucleotide binding]][specific DNA base contacts [nucleotide binding]]				11	NP_001009813.1;NP_001287988.1;NP_002389.1;NP_002390.1;NP_064545.1;NP_733774.1;NP_733775.1;NP_733776.1;NP_733777.1;NP_758526.1;NP_758527.1	424	NP_001009813.1	0 genes:. 11 proteins in this group did not match any genes. NP_001009813.1:homeobox protein Meis3 isoform 2 [Homo sapiens] ;NP_001287988.1:homeobox protein Meis3 isoform 2 [Homo sapiens] ;NP_002389.1:homeobox protein Meis1 [Homo sapiens] ;NP_002390.1:homeobox protein Meis2 isoform f [Homo sapiens] ;NP_064545.1:homeobox protein Meis3 isoform 1 [Homo sapiens] ;NP_733774.1:homeobox protein Meis2 is…	0	0	0	0	0	0	0	0	0	0	0	0	0	0	0	0	0	0	0	0	0	0.00015973	0	0	0	0
219	o	20	0.118	S	20	SLTM		15		[22..56][367..440][367..439]	[SAP][RRM_SF][RRM]	[Putative DNA-binding (bihelical) motif predicted to be involved in chromosomal organisation; smart00513][RNA recognition motif (RRM) superfamily; cl17169][RNA recognition motif; smart00360]	[2][93][93][97][97][139][144][271][383][403][403][525][532][533][533][535][535][572][730][782][891][926][977][984][984][996][1001][1003][1006]	[acetylation][phosphorylation][phosphorylation][phosphorylation][phosphorylation][phosphorylation][phosphorylation][phosphorylation][acetylation][phosphorylation][phosphorylation][phosphorylation][phosphorylation][phosphorylation][phosphorylation][phosphorylation][phosphorylation][phosphorylation][phosphorylation][phosphorylation][phosphorylation][phosphorylation][phosphorylation][phosphorylation…	[N-acetylalanine. {ECO:0000244|PubMed:19413330, ECO:0000244|PubMed:22814378, ECO:0000269|Ref.4}; propagated from UniProtKB/Swiss-Prot (Q9NWH9.2)][][Phosphoserine. {ECO:0000244|PubMed:17081983}; propagated from UniProtKB/Swiss-Prot (Q9NWH9.2)][][Phosphoserine. {ECO:0000244|PubMed:17081983}; propagated from UniProtKB/Swiss-Prot (Q9NWH9.2)][Phosphoserine. {ECO:0000250|UniProtKB:Q8CH25}; propagated f…				2	NP_001013865.1;NP_079031.2	430	NP_001013865.1	0 genes:. 2 proteins in this group did not match any genes. NP_001013865.1:SAFB-like transcription modulator isoform b [Homo sapiens] ;NP_079031.2:SAFB-like transcription modulator isoform a [Homo sapiens] ;	0	0	0	0	0	0	0	0	0	0	0	0	0	0	0	0	0	0	0	6.11e-05	0	5.628e-05	0.00021203	0	0	0
220	o	4	0.036	Q	0	RAI1		17		[1160..1177][1223..1240][1687..1902]	[Nuclear localization signal (Potential)][Nuclear localization signal (Potential)][ePHD_RAI1]	[propagated from UniProtKB/Swiss-Prot (Q7Z5J4.2)][propagated from UniProtKB/Swiss-Prot (Q7Z5J4.2)][Extended PHD finger (ePHD) found in retinoic acid-induced protein 1 (RAI1); cd15700]	[568][568][571][574][683][696][880][892][1064][1068][1122][1352][1358][1374][1431][order(1687,1690,1825,1828,1857,1860,1869,1874,1879,1882,][order(1856,1865..1869,1875,1897)]	[phosphorylation][phosphorylation][phosphorylation][phosphorylation][phosphorylation][phosphorylation][phosphorylation][phosphorylation][phosphorylation][phosphorylation][phosphorylation][phosphorylation][phosphorylation][phosphorylation][phosphorylation][other][other]	[][Phosphoserine; propagated from UniProtKB/Swiss-Prot (Q7Z5J4.2)][][][Phosphoserine; propagated from UniProtKB/Swiss-Prot (Q7Z5J4.2)][Phosphothreonine; propagated from UniProtKB/Swiss-Prot (Q7Z5J4.2)][Phosphoserine; propagated from UniProtKB/Swiss-Prot (Q7Z5J4.2)][Phosphoserine; propagated from UniProtKB/Swiss-Prot (Q7Z5J4.2)][Phosphoserine; propagated from UniProtKB/Swiss-Prot (Q7Z5J4.2)][Phosp…				1	NP_109590.3	431	NP_109590.3	retinoic acid-induced protein 1 [Homo sapiens]	0	0	0	0	0	0	0	0	0	0	0	0	0	0	0	0	0	0	0	0	0	0	1.615e-05	0	0	0
221	i7-24o	27	0.791	S	27	CRTAP		3											1	NP_006362.1	433	NP_006362.1	cartilage-associated protein precursor [Homo sapiens]	0	0	0	0	0	0	0	0	0	0	0	0	0	0	0	0	0	0	0	0.00015481	0	0	0	0	0	0
222	o	33	0.112	Q	33	MIF		22	5.3.3.12;5.3.2.1	[2..115]	[MIF]	[Macrophage migration inhibitory factor (MIF); pfam01187]	[37][78]	[phosphorylation][acetylation]	[][N6-acetyllysine, alternate; propagated from UniProtKB/Swiss-Prot (P14174.4)]				1	NP_002406.1	434	NP_002406.1	macrophage migration inhibitory factor [Homo sapiens]	0	0	0	0	0	0	0	0	0	0	0	0	0	0	0	0	0	0	0	0	0	0	0.00053521	0	0.00944251	0
223	o	15	0.223	Q	23	POLR1A		2	2.7.7.6	[4..1025][16..1004][958..1672][961..973][1199..1716]	[PRK08566][RNAP_I_RPA1_N][RNA_pol_Rpb1_5][Bridging helix. {ECO:0000250}][RNAP_I_Rpa1_C]	[DNA-directed RNA polymerase subunit A'; Validated][Largest subunit (RPA1) of eukaryotic RNA polymerase I (RNAP I), N-terminal domain; cd01435][RNA polymerase Rpb1, domain 5; pfam04998][propagated from UniProtKB/Swiss-Prot (O95602.2)][Largest subunit (Rpa1) of Eukaryotic RNA polymerase I (RNAP I), C-terminal domain; cd02735]	[order(64,67,74,77)][order(424,429,436,442,552..554,588,590,592,986..987)][order(588,590,592)][order(1201..1202,1206,1209,1710,1713..1716)][order(1208..1255,1604..1661,1663..1667)][order(1210,1213,1682,1692..1694,1700..1701,1703,1705,1710)][order(1255,1659,1675..1676,1679)][1386][order(1597..1598,1600,1610..1616,1618,1638,1649..1650,][1667..1708]	[other][active][active][other][other][other][DNA binding][phosphorylation][other][other]	[Zn-binding [ion binding]][putative active site region [active]][catalytic site [active]][Rpb1 (Rpa1) - Rpb6 interaction site [polypeptide binding]][cleft][Rpb1 (Rpa1) - Rpb2 (Rpa2) interaction site [polypeptide binding]][DNA binding site [nucleotide binding]][Phosphoserine. {ECO:0000244|PubMed:18669648}; propagated from UniProtKB/Swiss-Prot (O95602.2)][Rpb1 (Rpa1) - Rpb5 interaction site [polype…				1	NP_056240.2	442	NP_056240.2	DNA-directed RNA polymerase I subunit RPA1 [Homo sapiens]	0	0	0	0	0	0	0	0	0	0	0	0	0	0.003264	0	0.00292807	0	0	0	0	0	0	0	0	0	0
224						SPINT2		19		[74..126]	[KU]	[BPTI/Kunitz family of serine protease inhibitors; Structure is a disulfide rich alpha+beta fold. BPTI (bovine pancreatic trypsin inhibitor) is an extensively studied model structure; cd00109]	[order(84..88,90)]	[other]	[trypsin interaction site]				2	NP_001159575.1;NP_066925.1	445	NP_001159575.1	0 genes:. 2 proteins in this group did not match any genes. NP_001159575.1:kunitz-type protease inhibitor 2 isoform b precursor [Homo sapiens] ;NP_066925.1:kunitz-type protease inhibitor 2 isoform a precursor [Homo sapiens] ;	0	0	0	0	0	0	0	0	0	0	0	0	0	0	0	0	0	0	0	0	0.00247908	0.00117298	0.00031564	0	0.00278433	0
225	o	22	0.488	S	22	DDX17		22	3.6.4.13	[171..199][173..378][191..393][325..328][389..521]	[Q motif][DEADc][DEXDc][DEAD box][HELICc]	[propagated from UniProtKB/Swiss-Prot (Q92841.2)][DEAD-box helicases. A diverse family of proteins involved in ATP-dependent RNA unwinding, needed in a variety of cellular processes including splicing, ribosome biogenesis and RNA degradation. The name derives from the sequence of the Walker B motif...; cd00268][DEAD-like helicases superfamily; smart00487][propagated from UniProtKB/Swiss-Prot (Q92…	[64][218..222][325..328][356..358][order(426..429,449..450,475..477)][order(483,504,508,511)][523][604][674][678]	[phosphorylation][other][other][other][other][other][phosphorylation][phosphorylation][phosphorylation][phosphorylation]	[Phosphoserine. {ECO:0000244|PubMed:20068231, ECO:0000244|PubMed:24275569}; propagated from UniProtKB/Swiss-Prot (Q92841.2)][ATP binding site [chemical binding]][Mg++ binding site [ion binding]][motif III][nucleotide binding region [chemical binding]][ATP-binding site [chemical binding]][Phosphothreonine. {ECO:0000244|PubMed:16964243}; propagated from UniProtKB/Swiss-Prot (Q92841.2)][][][]				2	NP_001091974.1;NP_006377.2	447	NP_001091974.1	0 genes:. 2 proteins in this group did not match any genes. NP_001091974.1:probable ATP-dependent RNA helicase DDX17 isoform 3 [Homo sapiens] ;NP_006377.2:probable ATP-dependent RNA helicase DDX17 isoform 1 [Homo sapiens] ;	0	0	0	0	0.00366901	0	0	0.0002206	0.00114875	0.00060235	0	0.00028756	0	0	0	0	0	0	0	0.0003397	0	0	8.42e-05	0	0.00148548	0
226						SEC61A2		10		[1..415][40..74][75..415]	[PTZ00219][Plug_translocon][SecY]	[Sec61 alpha subunit; Provisional][Plug domain of Sec61p; pfam10559][SecY translocase; pfam00344]	[34..53][77..96][118..138][145..165][173..193][241..261][289..309][355..375]	[transmembrane region][transmembrane region][transmembrane region][transmembrane region][transmembrane region][transmembrane region][transmembrane region][transmembrane region]	[propagated from UniProtKB/Swiss-Prot (Q9H9S3.3)][propagated from UniProtKB/Swiss-Prot (Q9H9S3.3)][propagated from UniProtKB/Swiss-Prot (Q9H9S3.3)][propagated from UniProtKB/Swiss-Prot (Q9H9S3.3)][propagated from UniProtKB/Swiss-Prot (Q9H9S3.3)][propagated from UniProtKB/Swiss-Prot (Q9H9S3.3)][propagated from UniProtKB/Swiss-Prot (Q9H9S3.3)][propagated from UniProtKB/Swiss-Prot (Q9H9S3.3)]				3	NP_001136099.1;NP_001136100.1;NP_060614.2	448	NP_001136099.1	0 genes:. 3 proteins in this group did not match any genes. NP_001136099.1:protein transport protein Sec61 subunit alpha isoform 2 isoform c [Homo sapiens] ;NP_001136100.1:protein transport protein Sec61 subunit alpha isoform 2 isoform b [Homo sapiens] ;NP_060614.2:protein transport protein Sec61 subunit alpha isoform 2 isoform a [Homo sapiens] ;	0	0	0	0	0	0	0	0	0	0	0	0	0	0	0	0	0	0	0	0	0	0	7.042e-05	0	0	0
227	o	16	0.107	Q	18	CGGBP1		3		[80..84]	[Nuclear localization signal. {ECO:0000255}]	[propagated from UniProtKB/Swiss-Prot (Q9UFW8.2)]	[56][164][164]	[phosphorylation][phosphorylation][phosphorylation]	[Phosphoserine. {ECO:0000269|PubMed:20068231}; propagated from UniProtKB/Swiss-Prot (Q9UFW8.2)][][Phosphoserine. {ECO:0000269|PubMed:17525332, ECO:0000269|PubMed:20068231}; propagated from UniProtKB/Swiss-Prot (Q9UFW8.2)]				1	NP_003654.3	449	NP_003654.3	CGG triplet repeat-binding protein 1 [Homo sapiens]	0	0	0	0	0	0	0	0	0	0	0	0	0	0	0	0	0	0	0	0	0	0.00136965	0.00018428	0	0	0
228	o	3	0.059	Q	0	NUCKS1		1					[14][19][19][26][40][54][54][58][58][61][61][73][73][75][75][79][79][113][113][130][130][132][132][144][144][177][179][179][179][181][181][181][202][202][204][204][214][214][214][220][221][223][223][229][229][234][234][240][240]	[phosphorylation][phosphorylation][phosphorylation][phosphorylation][phosphorylation][phosphorylation][phosphorylation][phosphorylation][phosphorylation][phosphorylation][phosphorylation][phosphorylation][phosphorylation][phosphorylation][phosphorylation][phosphorylation][phosphorylation][phosphorylation][phosphorylation][phosphorylation][phosphorylation][phosphorylation][phosphorylation][phospho…	[][][Phosphoserine; propagated from UniProtKB/Swiss-Prot (Q9H1E3.1)][Phosphotyrosine; propagated from UniProtKB/Swiss-Prot (Q9H1E3.1)][][][Phosphoserine; propagated from UniProtKB/Swiss-Prot (Q9H1E3.1)][][Phosphoserine; propagated from UniProtKB/Swiss-Prot (Q9H1E3.1)][][Phosphoserine; propagated from UniProtKB/Swiss-Prot (Q9H1E3.1)][][Phosphoserine; propagated from UniProtKB/Swiss-Prot (Q9H1E3.1)…				1	NP_073568.2	450	NP_073568.2	nuclear ubiquitous casein and cyclin-dependent kinase substrate 1 [Homo sapiens]	0	0	0	0	0	0	0	0	0	0	0	0	0	0	0	0	0	0.0473862	0.0777884	0.0043431	0.00298408	0.00376512	0.00468586	0.0360827	0.0290464	0
229	i5-27o59-81i	24	0.737	S	24	RELL1		4		[58..>95]	[RELT]	[tumor necrosis factor receptor superfamily member 19; pfam12606]	[58..78][109][114][244][247]	[transmembrane region][phosphorylation][phosphorylation][phosphorylation][phosphorylation]	[propagated from UniProtKB/Swiss-Prot (Q8IUW5.1)][Phosphoserine. {ECO:0000244|PubMed:20068231}; propagated from UniProtKB/Swiss-Prot (Q8IUW5.1)][Phosphoserine. {ECO:0000244|PubMed:20068231}; propagated from UniProtKB/Swiss-Prot (Q8IUW5.1)][Phosphoserine. {ECO:0000244|PubMed:18669648}; propagated from UniProtKB/Swiss-Prot (Q8IUW5.1)][Phosphoserine. {ECO:0000244|PubMed:18669648}; propagated from Un…				1	NP_001078869.1	452	NP_001078869.1	RELT-like protein 1 precursor [Homo sapiens]	0	0	0	0	0	0	0	0	0	0	0	0	0	0	0	0	0	0	0	0	0	0	0.00022712	0	0	0
230						RTFDC1		20		[1..319]	[Rtf2]	[Rtf2 RING-finger; pfam04641]							2	NP_001269964.1;NP_057491.2	454	NP_001269964.1	0 genes:. 2 proteins in this group did not match any genes. NP_001269964.1:protein RTF2 homolog isoform a [Homo sapiens] ;NP_057491.2:protein RTF2 homolog isoform b [Homo sapiens] ;	0	0	0	0	0	0	0	0	0	0	0	0	0	0	0	0	0	0	0	0.00055429	0.00215813	0	0	0	0	0
231	o	4	0.032	Q	0	ABCF1		6		[302..833][304..525][627..815][<697..>774]	[Uup][ABCF_EF-3][ABCF_EF-3][P-loop_NTPase]	[ATPase components of ABC transporters with duplicated ATPase domains [General function prediction only]; COG0488][ATP-binding cassette domain of elongation factor 3, subfamily F; cd03221][ATP-binding cassette domain of elongation factor 3, subfamily F; cd03221][P-loop containing Nucleoside Triphosphate Hydrolases; cl21455]	[22][22][24][105][105][108][108][108][109][109][109][140][140][166][228][228][595][595][743..752][763..768][771..774]	[phosphorylation][phosphorylation][phosphorylation][phosphorylation][phosphorylation][phosphorylation][phosphorylation][phosphorylation][phosphorylation][phosphorylation][phosphorylation][phosphorylation][phosphorylation][phosphorylation][phosphorylation][phosphorylation][phosphorylation][phosphorylation][other][other][other]	[][Phosphoserine. {ECO:0000244|PubMed:20068231}; propagated from UniProtKB/Swiss-Prot (Q8NE71.2)][Phosphoserine. {ECO:0000244|PubMed:18669648}; propagated from UniProtKB/Swiss-Prot (Q8NE71.2)][][Phosphoserine. {ECO:0000244|PubMed:17081983, ECO:0000244|PubMed:20068231, ECO:0000244|PubMed:24275569}; propagated from UniProtKB/Swiss-Prot (Q8NE71.2)][][][Phosphothreonine. {ECO:0000244|PubMed:17081983,…				2	NP_001020262.1;NP_001081.1	455	NP_001020262.1	0 genes:. 2 proteins in this group did not match any genes. NP_001020262.1:ATP-binding cassette sub-family F member 1 isoform a [Homo sapiens] ;NP_001081.1:ATP-binding cassette sub-family F member 1 isoform b [Homo sapiens] ;	0	0	0	0	0.00238051	0.0010374	0	0.00019084	0	0	0	0	0	0	0	0	0	0	0	7.347e-05	0.00114419	0.00027069	0	0	0	0
232						AIP		11		[29..>90][179..212][183..225][230..260][265..298][265..293]	[FKBP_C][TPR 1][TPR repeat][TPR repeat][TPR 2][TPR repeat]	[FKBP-type peptidyl-prolyl cis-trans isomerase; pfam00254][propagated from UniProtKB/Swiss-Prot (O00170.2)][TPR repeat [structural motif]][TPR repeat [structural motif]][propagated from UniProtKB/Swiss-Prot (O00170.2)][TPR repeat [structural motif]]	[order(183..184,187..188,190,232,235..236,239..240,]	[other]	[putative protein binding surface [polypeptide binding]]				1	NP_003968.3	456	NP_003968.3	AH receptor-interacting protein isoform 1 [Homo sapiens]	0	0	0	0	0	0	0	0	0	0	0	0	0	0	0	0	0	0	0	0	0.00073245	0.00034656	0	0	0	0
233	o	42	0.061	Q	16	CCDC43		17					[139]	[phosphorylation]	[Phosphothreonine. {ECO:0000244|PubMed:19690332, ECO:0000244|PubMed:20068231, ECO:0000244|PubMed:21406692}; propagated from UniProtKB/Swiss-Prot (Q96MW1.2)]				1	NP_653210.2	458	NP_653210.2	coiled-coil domain-containing protein 43 isoform 1 [Homo sapiens]	0	0	0	0	0	0	0	0	0	0	0	0	0	0	0	0	0	0	0	0.00055429	0.00323719	0.00051056	0.00027477	0	0	0
235	o	21	0.017	Q	0	ZBTB26		9		[23..123][275..295][298..320][300..320][315..337][328..347][340..365][356..374]	[BTB][C2H2 Zn finger][zf-C2H2][C2H2 Zn finger][zf-H2C2_2][C2H2 Zn finger][zf-H2C2_2][C2H2 Zn finger]	[BTB/POZ domain; pfam00651][C2H2 Zn finger [structural motif]][Zinc finger, C2H2 type; pfam00096][C2H2 Zn finger [structural motif]][Zinc-finger double domain; pfam13465][C2H2 Zn finger [structural motif]][Zinc-finger double domain; pfam13465][C2H2 Zn finger [structural motif]]	[order(275,278,291,295)][order(300,303,316,320)][order(305,307,309,311..312,315..316,319,333,335,339..340,][order(328,331,344,348)]	[other][other][other][other]	[Zn binding site [ion binding]][Zn binding site [ion binding]][putative nucleic acid binding site [nucleotide binding]][Zn binding site [ion binding]]				1	NP_065975.1	461	NP_065975.1	zinc finger and BTB domain-containing protein 26 [Homo sapiens]	0	0	0	0	0	0	0	0	0	0	0	0	0	0	0	0	0	0	0	0	0.0005481	0	0	0	0	0
236	o	39	0.05	Q	19	DRG1		22		[1..367][2..16][65..297][291..366]	[Rbg1][Required for interaction with STK16][DRG][TGS_DRG_C]	[Ribosome-interacting GTPase 1 [Translation, ribosomal structure and biogenesis]; COG1163][propagated from UniProtKB/Swiss-Prot (Q9Y295.1)][Developmentally Regulated GTP-binding protein (DRG); cd01896][TGS_DRG_C: DRG (developmentally regulated GTP-binding protein) represents a family of GTP-binding proteins that includes two members, DRG1 and DRG2. DRG1 and DRG2 have a C-terminal TGS domain (name…	[2][71..78][order(74,76..79,173..174,176,201..203)][93..101][98][100][order(116..125,128..141)][117..120][248..251][271..273]	[acetylation][other][other][other][other][phosphorylation][other][other][other][other]	[N-acetylserine; propagated from UniProtKB/Swiss-Prot (Q9Y295.1)][G1 box][GTP/Mg2+ binding site [chemical binding]][Switch I region][G2 box][Phosphothreonine, by STK16; propagated from UniProtKB/Swiss-Prot (Q9Y295.1)][Switch II region][G3 box][G4 box][G5 box]				1	NP_004138.1	462	NP_004138.1	developmentally-regulated GTP-binding protein 1 [Homo sapiens]	0	0	0	0	0	0	0	0	0.00228812	0.00059988	0	0.00057278	0	0	0	0	0	0	0	0	0	0	0	0	0	0
237						RDH11		14	1.1.1.300	[41..244][41..239]	[PRK06197][NADB_Rossmann]	[short chain dehydrogenase; Provisional][Rossmann-fold NAD(P)(+)-binding proteins; cl21454]	[order(48,50..51,53,72..74,127..129,162..165)]	[other]	[NAD(P) binding site [chemical binding]]				2	NP_001239579.1;NP_057110.3	463	NP_001239579.1	0 genes:. 2 proteins in this group did not match any genes. NP_001239579.1:retinol dehydrogenase 11 isoform 2 precursor [Homo sapiens] ;NP_057110.3:retinol dehydrogenase 11 isoform 1 precursor [Homo sapiens] ;	0	0	0	0	0	0.00353468	0	0.00065024	0	0.00177546	0	0	0	0	0	0	0	0	0	0	0	0	0	0	0	0
238	o	37	0.351	S	39	IRS4		X		[79..202][231..334][487..490][678..800][700..703][717..720][743..746][779..782][828..831][895..897][921..924]	[PH_IRS][PTB_IRS][YXXM motif 1][CRK-binding][YXXM motif 2][YXXM motif 3][YXXM motif 4][YXXM motif 5][YXXM motif 6][GRB2-binding][YXXM motif 7]	[Insulin receptor substrate (IRS) pleckstrin homology (PH) domain; cd01257][Insulin receptor substrate phosphotyrosine-binding domain (PTBi); cd01204][propagated from UniProtKB/Swiss-Prot (O14654.1)][propagated from UniProtKB/Swiss-Prot (O14654.1)][propagated from UniProtKB/Swiss-Prot (O14654.1)][propagated from UniProtKB/Swiss-Prot (O14654.1)][propagated from UniProtKB/Swiss-Prot (O14654.1)][pro…	[order(240,242,248)][order(279..289,293,297..298,308,318,321,325,328..329,][700][717][743][779][921][1046]	[other][other][phosphorylation][phosphorylation][phosphorylation][phosphorylation][phosphorylation][phosphorylation]	[phosphoinositide binding site [chemical binding]][phosphopeptide binding site [polypeptide binding]][][][][][Phosphotyrosine; propagated from UniProtKB/Swiss-Prot (O14654.1)][]				1	NP_003595.1	465	NP_003595.1	insulin receptor substrate 4 [Homo sapiens]	0	0	0	0	0	0.00017434	0	0.00012829	0	0.00017514	0	0	0	0	0	0	0	0	0	0	0.00076916	0.00013647	0.00012241	0	0	0
240						MFAP2		1		[16..150]	[MAGP]	[Microfibril-associated glycoprotein (MAGP); pfam05507]	[17][46][47][49]	[other][sulfatation][sulfatation][sulfatation]	[. {ECO:0000250|UniProtKB:P27424}; propagated from UniProtKB/Swiss-Prot (P55001.1)][Sulfotyrosine. {ECO:0000305}; propagated from UniProtKB/Swiss-Prot (P55001.1)][Sulfotyrosine. {ECO:0000305}; propagated from UniProtKB/Swiss-Prot (P55001.1)][Sulfotyrosine. {ECO:0000305}; propagated from UniProtKB/Swiss-Prot (P55001.1)]				2	NP_001128720.1;NP_059453.1	467	NP_001128720.1	0 genes:. 2 proteins in this group did not match any genes. NP_001128720.1:microfibrillar-associated protein 2 isoform b precursor [Homo sapiens] ;NP_059453.1:microfibrillar-associated protein 2 isoform a precursor [Homo sapiens] ;	0	0	0	0	0	0	0	0	0	0	0	0	0	0	0	0	0	0	0	0.00068221	0	0.00031419	0	0	0	0
241	o	19	0.049	Q	19	RPL24		3		[1..54]	[Ribosomal_L24e_L24]	[Ribosomal protein L24e/L24 is a ribosomal protein found in eukaryotes (L24) and in archaea (L24e, distinct from archaeal L24). L24e/L24 is located on the surface of the large subunit, adjacent to proteins L14 and L3, and near the translation factor...; cd00472]	[order(6,9,32,36)][14..16][order(16,18..20,22,24..25)][order(17..18,34..35,37..38,42,44,50..51)][27][77][83][83][86][93]	[other][other][other][other][acetylation][acetylation][phosphorylation][phosphorylation][phosphorylation][acetylation]	[zinc binding site [ion binding]][L3 interface [polypeptide binding]][L14 interface [polypeptide binding]][23S rRNA interface [nucleotide binding]][N6-acetyllysine; propagated from UniProtKB/Swiss-Prot (P83731.1)][N6-acetyllysine; propagated from UniProtKB/Swiss-Prot (P83731.1)][][Phosphothreonine; propagated from UniProtKB/Swiss-Prot (P83731.1)][Phosphoserine; propagated from UniProtKB/Swiss-Pro…				1	NP_000977.1	473	NP_000977.1	60S ribosomal protein L24 [Homo sapiens]	0	0	0	0	0	0	0	0	0	0.00140228	0	0	0	0	0	0	0	0	0	0	0	0	0	0	0	0
242	o	34	0.018	Q	0	ZNF428		19											1	NP_872304.2	474	NP_872304.2	zinc finger protein 428 [Homo sapiens]	0	0	0	0	0	0	0	0	0	0	0	0	0	0	0	0	0	0	0	0.00099065	0	0	0	0	0	0
243	o	8	0.072	Q	25	RPL7A		9		[16..266][32..252]	[PTZ00365][Ribosomal_L7Ae]	[60S ribosomal protein L7Ae-like; Provisional][Ribosomal protein L7Ae/L30e/S12e/Gadd45 family; cl00600]	[34][97][217]	[acetylation][acetylation][acetylation]	[N6-acetyllysine; propagated from UniProtKB/Swiss-Prot (P62424.2)][N6-acetyllysine; propagated from UniProtKB/Swiss-Prot (P62424.2)][N6-acetyllysine; propagated from UniProtKB/Swiss-Prot (P62424.2)]				1	NP_000963.1	475	NP_000963.1	60S ribosomal protein L7a [Homo sapiens]	0	0	0	0	0	0	0	0	0	0	0	0	0	0	0	0	0	0	0	0	0	0	0	0	0.00408229	0
244						HMGB3		X		[33..96][113..178]	[HMGB-UBF_HMG-box][HMGB-UBF_HMG-box]	[HMGB-UBF_HMG-box, class II and III members of the HMG-box superfamily of DNA-binding proteins. These proteins bind the minor groove of DNA in a non-sequence specific fashion and contain two or more tandem HMG boxes. Class II members include non-histone...; cd01390][HMGB-UBF_HMG-box, class II and III members of the HMG-box superfamily of DNA-binding proteins. These proteins bind the minor groove …	[order(33..34,36..37,40..41,44,48,63,66,69,88)][order(115,117..118,120..121,124..125,128,132,145,148,151,]	[DNA binding][DNA binding]	[DNA binding site [nucleotide binding]][DNA binding site [nucleotide binding]]				2	NP_001288160.1;NP_005333.2	476	NP_001288160.1	0 genes:. 2 proteins in this group did not match any genes. NP_001288160.1:high mobility group protein B3 isoform b [Homo sapiens] ;NP_005333.2:high mobility group protein B3 isoform a [Homo sapiens] ;	0	0	0	0	0	0	0	0	0	0	0	0	0	0	0	0	0	0	0	0.00225748	0.0516381	0.0176747	0.00685437	0	0.00740379	0.0171699
245						CUX1		7		[75..>375][108..>248][118..310][554..640][946..1029][1131..1209][1256..1313][1314..1412]	[Sec3_C][iSH2_PI3K_IA_R][Lebercilin][CUT][CUT][CUT][homeodomain][Trypan_PARP]	[Exocyst complex component Sec3; cl19950][Inter-Src homology 2 (iSH2) helical domain of Class IA Phosphoinositide 3-kinase Regulatory subunits; cl17108][Ciliary protein causing Leber congenital amaurosis disease; pfam15619][CUT domain; pfam02376][CUT domain; pfam02376][CUT domain; pfam02376][Homeodomain; DNA binding domains involved in the transcriptional regulation of key eukaryotic developmenta…	[order(126,136,147..149,151..153,155..156,159..160,162,167,][order(1256..1260,1262,1279,1285,1298,1300..1301,][order(1258,1261,1301,1304..1305,1308)]	[other][DNA binding][other]	[heterodimer interface [polypeptide binding]][DNA binding site [nucleotide binding]][specific DNA base contacts [nucleotide binding]]				2	NP_001189472.1;NP_853530.2	478	NP_001189472.1	0 genes:. 2 proteins in this group did not match any genes. NP_001189472.1:protein CASP isoform d [Homo sapiens] ;NP_853530.2:protein CASP isoform a [Homo sapiens] ;	0	0	0	0	0	0	0	0	0	0	0	0	0	0	0	0	0	0	0	0	0	0	4.06e-05	0	0	0
246						GGCT		7	2.3.2.4	[19..>97][19..22]	[GGCT_like][Substrate binding (By similarity)]	[GGCT-like domains, also called AIG2-like family. Gamma-glutamyl cyclotransferase (GGCT) catalyzes the formation of pyroglutamic acid (5-oxoproline) from dipeptides containing gamma-glutamyl, and is a dimeric protein. In Homo sapiens, the protein is...; cd06661][propagated from UniProtKB/Swiss-Prot (O75223.1)]	[order(19,22,24..25,97)]	[active]	[putative active site pocket [active]]				4	NP_001186744.1;NP_001186745.1;NP_001186746.1;NP_076956.1	480	NP_001186744.1	0 genes:. 4 proteins in this group did not match any genes. NP_001186744.1:gamma-glutamylcyclotransferase isoform 2 [Homo sapiens] ;NP_001186745.1:gamma-glutamylcyclotransferase isoform 3 [Homo sapiens] ;NP_001186746.1:gamma-glutamylcyclotransferase isoform 4 [Homo sapiens] ;NP_076956.1:gamma-glutamylcyclotransferase isoform 1 [Homo sapiens] ;	0	0	0	0	0	0	0	0.00097144	0	0	0	0	0	0	0	0	0	0	0	0	0	0	0	0	0	0
247	o	26	0.027	Q	26	SART1		11		[117..754]	[SART-1]	[SART-1 family; pfam03343]	[94][141][189][392][392][430][430][448][448][463][466][474][486][521][591][591][596][596][598][598][621][695][695][709][742][764]	[modified][modified][phosphorylation][phosphorylation][phosphorylation][phosphorylation][phosphorylation][phosphorylation][phosphorylation][phosphorylation][phosphorylation][phosphorylation][phosphorylation][phosphorylation][phosphorylation][phosphorylation][phosphorylation][phosphorylation][phosphorylation][phosphorylation][phosphorylation][phosphorylation][phosphorylation][modified][modified][p…	[sumoylation site][sumoylation site][Phosphothreonine. {ECO:0000250|UniProtKB:Q9Z315}; propagated from UniProtKB/Swiss-Prot (O43290.1)][][Phosphothreonine. {ECO:0000244|PubMed:18669648}; propagated from UniProtKB/Swiss-Prot (O43290.1)][][Phosphothreonine. {ECO:0000244|PubMed:17525332, ECO:0000244|PubMed:19690332}; propagated from UniProtKB/Swiss-Prot (O43290.1)][][Phosphoserine. {ECO:0000244|PubM…				1	NP_005137.1	481	NP_005137.1	U4/U6.U5 tri-snRNP-associated protein 1 [Homo sapiens]	0	0	0	0	0	0	0	0	0	0	0	0	0	0	0	0	0	0	0	0.0003104	0	0	0	0	0	0
248	o	13	0.013	Q	0	RBM8A		1		[67..151][75..146]	[RRM_RBM8][RRM]	[RNA recognition motif in RNA-binding protein RBM8A, RBM8B nd similar proteins; cd12324][RNA recognition motif; smart00360]	[2][24][42][42][46][56][order(67..71,76,78,100..101,103,105,107..109,114,116,118,][166][168]	[acetylation][phosphorylation][phosphorylation][phosphorylation][phosphorylation][phosphorylation][other][phosphorylation][phosphorylation]	[N-acetylalanine. {ECO:0000244|PubMed:19413330, ECO:0000244|PubMed:20068231, ECO:0000244|PubMed:21406692}; propagated from UniProtKB/Swiss-Prot (Q9Y5S9.1)][Phosphoserine. {ECO:0000244|PubMed:20068231, ECO:0000244|PubMed:21406692}; propagated from UniProtKB/Swiss-Prot (Q9Y5S9.1)][][Phosphoserine. {ECO:0000244|PubMed:17081983, ECO:0000244|PubMed:18669648, ECO:0000244|PubMed:20068231, ECO:0000244|Pu…				1	NP_005096.1	483	NP_005096.1	RNA-binding protein 8A [Homo sapiens]	0	0	0	0	0	0	0	0	0	0	0	0	0	0	0	0	0	0	0	0	0.00694569	0.00262909	0	0	0	0
249						WDR87		19		[147..185][238..278][251..646][252..531][281..322][407..446][412..674][454..499][555..592][604..643][1602..2018][<1621..1744][1800..>2287]	[WD 1][WD 2][WD40][WD40][WD 3][WD 4][WD40][WD 5][WD 6][WD 7][Trichoplein][Phage_GPO][PRK03918]	[propagated from UniProtKB/Swiss-Prot (Q6ZQQ6.3)][propagated from UniProtKB/Swiss-Prot (Q6ZQQ6.3)][WD40 repeat [General function prediction only]; COG2319][WD40 domain, found in a number of eukaryotic proteins that cover a wide variety of functions including adaptor/regulatory modules in signal transduction, pre-mRNA processing and cytoskeleton assembly; typically contains a GH dipeptide 11-24 re…	[order(258,262,268..269,281..282,300,304,310..311,324,340,][order(428,436..437,449..450,479,483,489..490,501..502,526,]	[other][other]	[structural tetrad][structural tetrad]				2	NP_001278017.1;NP_114157.4	484	NP_001278017.1	0 genes:. 2 proteins in this group did not match any genes. NP_001278017.1:WD repeat-containing protein 87 isoform 1 [Homo sapiens] ;NP_114157.4:WD repeat-containing protein 87 isoform 2 [Homo sapiens] ;	0	0	0	0	0	7.526e-05	0	0	0	0	0	0	0	0	0	0	0	0	0	0	0	0	0	0	0	0
250						GNAI2		3		[3..316][3..312]	[G_alpha][G-alpha]	[G protein alpha subunit; smart00275][Alpha subunit of G proteins (guanine nucleotide binding); cd00066]	[order(3,8..10,145,164,167,233..234,236,289..290)][3..10][order(4..6,34,38,42,45,48..49,67,70,113,142,167,175,179)][140..148][145][order(146,148,150,161,163,167..169,171,174..175,177..180)][order(148,173,176..177,180)][164..167][165..181][233..236][order(281..292,294..297)][289..291]	[other][other][other][other][other][other][other][other][other][other][other][other]	[GTP/Mg2+ binding site [chemical binding]][G1 box][GoLoco binding site][Switch I region][G2 box][beta - gamma complex interaction site [polypeptide binding]][adenylyl cyclase interaction site [polypeptide binding]][G3 box][Switch II region][G4 box][putative receptor binding site][G5 box]				6	NP_001159897.1;NP_001269546.1;NP_001269547.1;NP_001269548.1;NP_001269549.1;NP_002061.1	486	NP_001159897.1	0 genes:. 6 proteins in this group did not match any genes. NP_001159897.1:guanine nucleotide-binding protein G(i) subunit alpha-2 isoform 2 [Homo sapiens] ;NP_001269546.1:guanine nucleotide-binding protein G(i) subunit alpha-2 isoform 3 [Homo sapiens] ;NP_001269547.1:guanine nucleotide-binding protein G(i) subunit alpha-2 isoform 4 [Homo sapiens] ;NP_001269548.1:guanine nucleotide-binding protei…	0	0	0	0	0	0	0	0	0	0	0	0	0	0	0	0	0	0	0	0.00019522	0	0	0	0	0	0
251	o	15	0.037	Q	15	TPR		1		[3..13][14..117][<75..155][146..1049][437..513][1036..1167][1218..1320][1812..1867]	[Sufficient for interaction with TPR][Necessary for interaction with HSF1][DUF342][Smc][Necessary for association to the NPC][TPR_MLP1_2][Necessary for interaction with HSF1][Sufficient and essential for mediating its nuclear import]	[propagated from UniProtKB/Swiss-Prot (P12270.3)][propagated from UniProtKB/Swiss-Prot (P12270.3)][Protein of unknown function (DUF342); cl19219][Chromosome segregation ATPase [Cell cycle control, cell division, chromosome partitioning]; COG1196][propagated from UniProtKB/Swiss-Prot (P12270.3)][TPR/MLP1/MLP2-like protein; pfam07926][propagated from UniProtKB/Swiss-Prot (P12270.3)][propagated from…	[2][191][252][312][345][379][381][428][457][477][522][523][523][527][528][529][530][632][650][713][723][748][755][920][1185][1185][1690][1692][1893][2034][2037][2048][2050][2050][2073][2073][2116][2155][2155]	[acetylation][other][acetylation][acetylation][acetylation][phosphorylation][phosphorylation][acetylation][acetylation][acetylation][phosphorylation][phosphorylation][phosphorylation][phosphorylation][phosphorylation][phosphorylation][phosphorylation][phosphorylation][phosphorylation][acetylation][acetylation][acetylation][acetylation][phosphorylation][phosphorylation][phosphorylation][acetylatio…	[N-acetylalanine. {ECO:0000244|PubMed:19413330, ECO:0000244|PubMed:22223895, ECO:0000244|PubMed:22814378, ECO:0000269|Ref.9}; propagated from UniProtKB/Swiss-Prot (P12270.3)][Breakpoint for translocation to form TRK-T1; propagated from UniProtKB/Swiss-Prot (P12270.3)][N6-acetyllysine. {ECO:0000244|PubMed:19608861}; propagated from UniProtKB/Swiss-Prot (P12270.3)][N6-acetyllysine. {ECO:0000244|Pub…				1	NP_003283.2	489	NP_003283.2	nucleoprotein TPR [Homo sapiens]	0	0	0	0	0	0	0	0	0	0	0	0	0	0	0	0.00017761	0	0	0	0	0	0	0	0	0	0
252	o	31	0.024	Q	31	PAPOLG		2	2.7.7.19	[16..364][59..213][365..507]	[PAP_central][NT_PAP_TUTase][PAP_RNA-bind]	[Poly(A) polymerase central domain; pfam04928][Nucleotidyltransferase (NT) domain of poly(A) polymerases and terminal uridylyl transferases; cd05402][Poly(A) polymerase predicted RNA binding domain; pfam04926]	[2][23][order(99..101,111..112,114,152..153,155,157,166,201..202,][order(99,152,155,157,166,201..202)][order(112,114,166)][152][157][327][398][532][648][654][684]	[acetylation][phosphorylation][active][other][metal-binding][other][other][other][other][other][phosphorylation][phosphorylation][phosphorylation]	[N6-acetyllysine. {ECO:0000244|PubMed:21406692}; propagated from UniProtKB/Swiss-Prot (Q9BWT3.2)][Phosphoserine. {ECO:0000244|PubMed:18669648}; propagated from UniProtKB/Swiss-Prot (Q9BWT3.2)][][putative primer-binding pocket][metal binding triad [ion binding]][Interaction with RNA. {ECO:0000250}; propagated from UniProtKB/Swiss-Prot (Q9BWT3.2)][Interaction with RNA. {ECO:0000250}; propagated fro…				1	NP_075045.2	490	NP_075045.2	poly(A) polymerase gamma [Homo sapiens]	0	0	0	0	0	0	0	0	0	0	0	0	0	0	0	0	0	0	0	0	0	7.769e-05	0	0	0	0
253						TNIK		3	2.7.11.1	[18..313][25..289][1034..1332]	[STKc_TNIK][S_TKc][CNH]	[Catalytic domain of the Serine/Threonine Kinase, Traf2- and Nck-Interacting Kinase; cd06637][Serine/Threonine protein kinases, catalytic domain; smart00220][Domain found in NIK1-like kinases, mouse citron and yeast ROM1, ROM2; smart00036]	[order(31..35,39,52,54,83,105..108,111..112,115,153,][order(31..35,39,52,54,83,105..108,111..112,115,157..158,][order(34..35,153,155..157,174,188..191,193,225,234)][170..193][187][324][326][560][570][581][640][678][680][688][707][720][764][766][769]	[active][other][other][other][phosphorylation][phosphorylation][phosphorylation][phosphorylation][phosphorylation][phosphorylation][phosphorylation][phosphorylation][phosphorylation][phosphorylation][phosphorylation][phosphorylation][phosphorylation][phosphorylation][phosphorylation]	[][ATP binding site [chemical binding]][polypeptide substrate binding site [polypeptide binding]][activation loop (A-loop)][Phosphothreonine. {ECO:0000250|UniProtKB:P83510}; propagated from UniProtKB/Swiss-Prot (Q9UKE5.1)][Phosphoserine. {ECO:0000250|UniProtKB:P83510}; propagated from UniProtKB/Swiss-Prot (Q9UKE5.1)][Phosphoserine. {ECO:0000244|PubMed:21406692}; propagated from UniProtKB/Swiss-Pr…				8	NP_001155032.1;NP_001155033.1;NP_001155034.1;NP_001155035.1;NP_001155036.1;NP_001155037.1;NP_001155038.1;NP_055843.1	492	NP_001155032.1	0 genes:. 8 proteins in this group did not match any genes. NP_001155032.1:TRAF2 and NCK-interacting protein kinase isoform 2 [Homo sapiens] ;NP_001155033.1:TRAF2 and NCK-interacting protein kinase isoform 3 [Homo sapiens] ;NP_001155034.1:TRAF2 and NCK-interacting protein kinase isoform 4 [Homo sapiens] ;NP_001155035.1:TRAF2 and NCK-interacting protein kinase isoform 5 [Homo sapiens] ;NP_00115503…	0	0	0	0	0	0	0	0	0	0	0	0	0	0	0	0	0	0	0	4.592e-05	0	0	0	0	0	0
254	o	37	0.01	Q	0	DYNC1I2		2		[124..156][271..590][321..>591]	[Dynein_IC2][WD40][WD40]	[Cytoplasmic dynein 1 intermediate chain 2; pfam11540][WD40 domain, found in a number of eukaryotic proteins that cover a wide variety of functions including adaptor/regulatory modules in signal transduction, pre-mRNA processing and cytoskeleton assembly; typically contains a GH dipeptide 11-24 residues from...; cl02567][WD40 repeat [General function prediction only]; COG2319]	[order(271,288,302,308..309,321..322,341,346,352..353,]	[other]	[structural tetrad]				5	NP_001258716.1;NP_001258718.1;NP_001307812.1;NP_001307813.1;NP_001369.1	493	NP_001258716.1	0 genes:. 5 proteins in this group did not match any genes. NP_001258716.1:cytoplasmic dynein 1 intermediate chain 2 isoform 2 [Homo sapiens] ;NP_001258718.1:cytoplasmic dynein 1 intermediate chain 2 isoform 3 [Homo sapiens] ;NP_001307812.1:cytoplasmic dynein 1 intermediate chain 2 isoform 5 [Homo sapiens] ;NP_001307813.1:cytoplasmic dynein 1 intermediate chain 2 isoform 4 [Homo sapiens] ;NP_0013…	0	0	0	0	0	0	0	0.00051193	0	0	0	0	0	0.00198027	0	0.00066617	0	0	0	0	0	0	0	0	0	0
255						SDHA		5	1.3.5.1	[40..616][<104..423][464..616]	[PTZ00139][NADB_Rossmann][Succ_DH_flav_C]	[Succinate dehydrogenase [ubiquinone] flavoprotein subunit; Provisional][Rossmann-fold NAD(P)(+)-binding proteins; cl21454][Fumarate reductase flavoprotein C-term; pfam02910]							2	NP_001281261.1;NP_004159.2	494	NP_001281261.1	0 genes:. 2 proteins in this group did not match any genes. NP_001281261.1:succinate dehydrogenase [ubiquinone] flavoprotein subunit, mitochondrial isoform 2 [Homo sapiens] ;NP_004159.2:succinate dehydrogenase [ubiquinone] flavoprotein subunit, mitochondrial isoform 1 [Homo sapiens] ;	0	0	0	0	0	0	0	0	0	0	0	0.00272999	0	0	0	0	0	0	0	0.00030234	0	0.00018566	0	0	0	0
256						ISCU		12		[34..139]	[IscU_like]	[Iron-sulfur cluster scaffold-like proteins; cd06664]	[order(34..37,40..41,69..70,95,97,134..135,137..138)][order(69,95,138)]	[other][active]	[trimerization site [polypeptide binding]][]				4	NP_001288070.1;NP_001306971.1;NP_055116.1;NP_998760.1	496	NP_001288070.1	0 genes:. 4 proteins in this group did not match any genes. NP_001288070.1:iron-sulfur cluster assembly enzyme ISCU, mitochondrial isoform 4 precursor [Homo sapiens] ;NP_001306971.1:iron-sulfur cluster assembly enzyme ISCU, mitochondrial isoform 3 precursor [Homo sapiens] ;NP_055116.1:iron-sulfur cluster assembly enzyme ISCU, mitochondrial isoform 1 [Homo sapiens] ;NP_998760.1:iron-sulfur cluster…	0	0	0	0	0	0	0	0	0	0	0	0	0	0	0	0	0	0	0	0	0	0.00036656	0.0007891	0	0	0
257	o	37	0.03	Q	20	ACTR1A		10		[9..376][12..186]	[ACTIN][NBD_sugar-kinase_HSP70_actin]	[Actin; smart00268][Nucleotide-Binding Domain of the sugar kinase/HSP70/actin superfamily; cd00012]	[1][order(15..18,20,22,142,159..162)]	[acetylation][other]	[N-acetylmethionine. {ECO:0000244|PubMed:19413330, ECO:0000244|PubMed:22223895}; propagated from UniProtKB/Swiss-Prot (P61163.1)][nucleotide binding site [chemical binding]]				1	NP_005727.1	498	NP_005727.1	alpha-centractin [Homo sapiens]	0	0	0	0	0	0	0	0.00042888	0	0	0	0	0	0	0	0	0	0	0	0	0	0	0	0	0	0
258	o	41	0.035	Q	0	MYL6		12		[5..150][11..75][11..39][94..148]	[PTZ00184][EFh][EFh][EFh]	[calmodulin; Provisional][EF-hand, calcium binding motif; A diverse superfamily of calcium sensors and calcium signal modulators; most examples in this alignment model have 2 active canonical EF hands. Ca2+ binding induces a conformational change in the EF-hand motif, leading to...; cl08302][EF-hand, calcium binding motif; smart00054][EF-hand, calcium binding motif; A diverse superfamily of calci…	[2][29][57][81][86][89][order(97,99,101,108,132,134,136,143)]	[acetylation][phosphorylation][phosphorylation][acetylation][phosphorylation][phosphorylation][other]	[N-acetylcysteine. {ECO:0000244|PubMed:19413330, ECO:0000244|PubMed:22223895, ECO:0000244|PubMed:22814378, ECO:0000244|PubMed:25944712}; propagated from UniProtKB/Swiss-Prot (P60660.2)][][Phosphoserine. {ECO:0000244|PubMed:24275569}; propagated from UniProtKB/Swiss-Prot (P60660.2)][N6-acetyllysine. {ECO:0000244|PubMed:19608861}; propagated from UniProtKB/Swiss-Prot (P60660.2)][][][Ca2+ binding si…				2	NP_066299.2;NP_524147.2	499	NP_066299.2	0 genes:. 2 proteins in this group did not match any genes. NP_066299.2:myosin light polypeptide 6 isoform 1 [Homo sapiens] ;NP_524147.2:myosin light polypeptide 6 isoform 2 [Homo sapiens] ;	0.00124564	0	0	0	0	0	0	0	0	0	0	0	0	0	0	0	0	0	0	0	0	0	0	0	0	0
259	o	24	0.075	Q	22	FOXD2		1		[127..204]	[FH]	[Forkhead (FH), also known as a 'winged helix'. FH is named for the Drosophila fork head protein, a transcription factor which promotes terminal rather than segmental development. This family of transcription factor domains, which bind to B-DNA as...; cd00059]	[order(163..164,173,176..177,197)]	[DNA binding]	[DNA binding site [nucleotide binding]]				1	NP_004465.3	500	NP_004465.3	forkhead box protein D2 [Homo sapiens]	0	0	0	0	0	0	0	0	0	0.00044476	0	0	0	0	0	0	0	0	0	0	0	0	0	0	0	0
260	o	17	0.186	Q	55	RBM25		14		[87..169][88..159][285..644][763..836]	[RRM_RBM25][RRM][Necessary for nuclear speckle localization][PWI]	[RNA recognition motif in eukaryotic RNA-binding protein 25 and similar proteins; cd12446][RNA recognition motif; smart00360][propagated from UniProtKB/Swiss-Prot (P49756.3)][PWI, domain in splicing factors; smart00311]	[583][675][677][677][677][683][703]	[phosphorylation][phosphorylation][phosphorylation][phosphorylation][phosphorylation][phosphorylation][phosphorylation]	[Phosphoserine; propagated from UniProtKB/Swiss-Prot (P49756.3)][][][][Phosphoserine; propagated from UniProtKB/Swiss-Prot (P49756.3)][Phosphoserine; propagated from UniProtKB/Swiss-Prot (P49756.3)][Phosphoserine; propagated from UniProtKB/Swiss-Prot (P49756.3)]				1	NP_067062.1	502	NP_067062.1	RNA-binding protein 25 [Homo sapiens]	0	0	0	0	0	0	0	0	0	0	0	0	0	0	0	0	0	0	0	0	0	0.00074616	0.00010952	0	0	0
261	o	37	0.024	Q	0	C2orf16		2		[1486..>1805][1593..1935][<1782..1950]	[TrkH][27 X 8 AA approximative tandem repeat of P-S-E-R-S-H-H-S][DNA_pol_viral_N]	[Cation transport protein; cl17365][propagated from UniProtKB/Swiss-Prot (Q68DN1.3)][DNA polymerase (viral) N-terminal domain; pfam00242]							1	NP_115642.3	503	NP_115642.3	uncharacterized protein C2orf16 [Homo sapiens]	0	0	0.0202259	0	0	0	0	0	0	0	0	0	0	0	0	0	0	0	0	0	0	0	0	0	0	0
262	o	13	0.044	Q	0	GAPDH		12	1.2.1.12	[<1..110][115..272]	[Gp_dh_N][Gp_dh_C]	[Glyceraldehyde 3-phosphate dehydrogenase, NAD binding domain; pfam00044][Glyceraldehyde 3-phosphate dehydrogenase, C-terminal domain; pfam02800]							2	NP_001243728.1;NP_002037.2	504	NP_001243728.1	0 genes:. 2 proteins in this group did not match any genes. NP_001243728.1:glyceraldehyde-3-phosphate dehydrogenase isoform 2 [Homo sapiens] ;NP_002037.2:glyceraldehyde-3-phosphate dehydrogenase isoform 1 [Homo sapiens] ;	0.0012839	0	0	0	0	0.00149591	0	0.00165112	0	0	0	0	0	0	0	0.00143239	0	0	0	0.00572075	0	0	0	0	0	0
263						ASB12		X		[<38..103][75..201][77..168][146..250][184..>250][277..315]	[Ank_2][ANK][Ank_2][Ank_2][ANK][SOCS_box]	[Ankyrin repeats (3 copies); pfam12796][ankyrin repeats; ankyrin repeats mediate protein-protein interactions in very diverse families of proteins. The number of ANK repeats in a protein can range from 2 to over 20 (ankyrins, for example). ANK repeats may occur in combinations with other...; cd00204][Ankyrin repeats (3 copies); pfam12796][Ankyrin repeats (3 copies); pfam12796][ankyrin repeats; an…	[order(276..281,287,298,304)]	[other]	[elongin B/C interaction]				1	NP_569059.3	505	NP_569059.3	ankyrin repeat and SOCS box protein 12 [Homo sapiens]	0	0	0	0	0	0	0	0	0	0	0	0	0	0	0	0	0	0	0	0.00019522	0	0	0	0	0	0
264	o	19	0.06	Q	19	ISG20L2		1		[165..>337][180..336]	[DnaQ][ISG20]	[DNA polymerase III, epsilon subunit or related 3'-5' exonuclease [Replication, recombination and repair]; COG0847][DEDDh 3'-5' exonuclease domain of Interferon Stimulated Gene product of 20 kDa, and similar proteins; cd06149]	[order(183..186,188,226,230,262..263,265..267,322,327)][order(183..186,188,226,230,262..263,265..266,322,327)][order(183,185,267,322,327)]	[active][other][active]	[][substrate binding site [chemical binding]][catalytic site [active]]				1	NP_001290024.1	507	NP_001290024.1	interferon-stimulated 20 kDa exonuclease-like 2 [Homo sapiens]	0	0	0	0	0	0	0	0	0	0	0	0	0	0	0	0	0	0	0	0	0	0	8.718e-05	0	0	0
265	o	27	0.309	Q	27	TCOF1		5		[6..37][310..828]	[LisH][Treacle]	[Lissencephaly type-1-like homology motif; smart00667][Treacher Collins syndrome protein Treacle; pfam03546]	[83][84][85][87][88][153][156][164][171][173][298][304][398][400][401][402][405][407][456][504][505][506][531][533][534][537][538][540][543][609][616][617][618][619][622][779][785][791][793][794][798][800][806][813][829][855][857][858][859][862][864][890][913][915][916][919][920][921][922][924][933][937][1034][1113][1124][1150][1151][1151][1153][1180][1273][1299][1301][1301][1333][1394]	[phosphorylation][phosphorylation][phosphorylation][phosphorylation][phosphorylation][phosphorylation][phosphorylation][phosphorylation][phosphorylation][phosphorylation][phosphorylation][phosphorylation][phosphorylation][phosphorylation][phosphorylation][phosphorylation][phosphorylation][phosphorylation][phosphorylation][phosphorylation][phosphorylation][phosphorylation][phosphorylation][phospho…					3	NP_000347.2;NP_001128715.1;NP_001128717.1	508	NP_000347.2	0 genes:. 3 proteins in this group did not match any genes. NP_000347.2:treacle protein isoform b [Homo sapiens] ;NP_001128715.1:treacle protein isoform d [Homo sapiens] ;NP_001128717.1:treacle protein isoform f [Homo sapiens] ;	0	0	0	0	0	0	0	0	0	0	0	0	0	0	0	0.00029744	0	0	0	0.00017599	0	0	0	0	0	0
266	o	30	0.051	Q	26	S100A11		1		[7..95][25..38][27..84][68..79]	[S-100A11][Calcium binding region][EF-hand_7][Calcium binding region]	[S-100A11: S-100A11 domain found in proteins similar to S100A11. S100A11 is a member of the S-100 domain family within EF-hand Ca2+-binding proteins superfamily. Note that the S-100 hierarchy, to which this S-100A11 group belongs, contains only S-100...; cd05023][][EF-hand domain pair; pfam13499][]	[1][2][3][6][order(8,10..11,13..18,20..22,32,42,46..50,77..78,81..82,][10][10][order(25,28,30,33,38,68,70,72,74,79)][30][32][order(47,49..50,53..54,59,87,90..91,94..95)][69][78][94]	[acetylation][acetylation][acetylation][phosphorylation][other][phosphorylation][phosphorylation][other][phosphorylation][phosphorylation][other][phosphorylation][phosphorylation][phosphorylation]	[N-acetylmethionine; propagated from UniProtKB/Swiss-Prot (P31949.2)][N-acetylalanine, in Protein S100-A11, N-terminally processed; propagated from UniProtKB/Swiss-Prot (P31949.2)][N6-acetyllysine; propagated from UniProtKB/Swiss-Prot (P31949.2)][Phosphoserine; propagated from UniProtKB/Swiss-Prot (P31949.2)][dimerization interface [polypeptide binding]][][Phosphothreonine; propagated from UniPro…				1	NP_005611.1	510	NP_005611.1	protein S100-A11 [Homo sapiens]	0.00179135	0	0	0	0	0	0	0	0	0	0	0	0	0	0	0	0	0	0	0	0	0	0.00029309	0	0	0
267	o	38	0.023	Q	30	TAF9		5	2.7.4.3	[13..129]	[TAF9]	[TATA Binding Protein (TBP) Associated Factor 9 (TAF9) is one of several TAFs that bind TBP and is involved in forming Transcription Factor IID (TFIID) complex; cd07979]	[1][5][85][149][155][158][159][161][164][178][181]	[acetylation][acetylation][phosphorylation][phosphorylation][phosphorylation][phosphorylation][phosphorylation][phosphorylation][phosphorylation][phosphorylation][phosphorylation]	[N-acetylmethionine. {ECO:0000250|UniProtKB:Q9HBM6}; propagated from UniProtKB/Swiss-Prot (Q16594.1)][N6-acetyllysine. {ECO:0000244|PubMed:19608861}; propagated from UniProtKB/Swiss-Prot (Q16594.1)][][Phosphoserine. {ECO:0000244|PubMed:19690332, ECO:0000244|PubMed:20068231}; propagated from UniProtKB/Swiss-Prot (Q16594.1)][Phosphoserine. {ECO:0000250|UniProtKB:Q8VI33}; propagated from UniProtKB/S…				1	NP_003178.1	512	NP_003178.1	transcription initiation factor TFIID subunit 9 [Homo sapiens]	0	0	0	0	0	0	0	0.00061083	0	0	0	0	0	0	0	0	0	0	0	0	0	0	0	0	0	0
268						NSRP1		17		[2..127]	[DUF2040]	[Coiled-coil domain-containing protein 55 (DUF2040); pfam09745]							2	NP_001248396.1;NP_115517.1	515	NP_001248396.1	0 genes:. 2 proteins in this group did not match any genes. NP_001248396.1:nuclear speckle splicing regulatory protein 1 isoform 2 [Homo sapiens] ;NP_115517.1:nuclear speckle splicing regulatory protein 1 isoform 1 [Homo sapiens] ;	0	0	0	0	0	0	0	0	0	0	0	0	0	0	0	0	0	0	0	0.0004927	0.00047958	0.00011346	0	0	0	0
269	o	32	0.057	Q	32	STMN1		1		[4..143]	[Stathmin]	[Stathmin family; pfam00836]	[2][9][16][16][16][16][25][25][25][25][31][38][38][38][63][63][63][63][100][119]	[acetylation][acetylation][phosphorylation][phosphorylation][phosphorylation][phosphorylation][phosphorylation][phosphorylation][phosphorylation][phosphorylation][phosphorylation][phosphorylation][phosphorylation][phosphorylation][phosphorylation][phosphorylation][phosphorylation][phosphorylation][acetylation][acetylation]	[N-acetylalanine. {ECO:0000244|PubMed:19413330, ECO:0000244|PubMed:22223895, ECO:0000244|PubMed:22814378, ECO:0000269|PubMed:1737801}; propagated from UniProtKB/Swiss-Prot (P16949.3)][N6-acetyllysine. {ECO:0000244|PubMed:19608861}; propagated from UniProtKB/Swiss-Prot (P16949.3)][][][][Phosphoserine. {ECO:0000244|PubMed:16964243, ECO:0000244|PubMed:17081983, ECO:0000244|PubMed:17924679, ECO:00002…				1	NP_981946.1	516	NP_981946.1	stathmin isoform a [Homo sapiens]	0	0	0	0	0	0	0	0	0	0	0	0	0	0	0	0	0	0	0.00792894	0.00374984	0.00162222	0	0.00041308	0	0	0
270	o	18	0.862	S	18	CTSV		9	3.4.22.43	[6..320][29..87][115..332]	[PTZ00203][Inhibitor_I29][Peptidase_C1A]	[cathepsin L protease; Provisional][Cathepsin propeptide inhibitor domain (I29); smart00848][Peptidase C1A subfamily (MEROPS database nomenclature); composed of cysteine peptidases (CPs) similar to papain, including the mammalian CPs (cathepsins B, C, F, H, L, K, O, S, V, X and W). Papain is an endopeptidase with specific substrate preferences; cd02248]	[2][order(132,138,277,301)][order(182..183,249,275,278,328)][221][292]	[glycosylation][active][other][glycosylation][glycosylation]	[][][S2 subsite][][]				1	NP_001324.2	517	NP_001324.2	cathepsin L2 preproprotein [Homo sapiens]	0	0	0	0	0	0	0	0	0	0	0	0	0	0	0	0	0	0	0	0	0	0.00034241	0.00018428	0	0	0
271	o	26	0.038	Q	24	HMGB2		4		[9..76][95..160]	[HMGB-UBF_HMG-box][HMGB-UBF_HMG-box]	[HMGB-UBF_HMG-box, class II and III members of the HMG-box superfamily of DNA-binding proteins. These proteins bind the minor groove of DNA in a non-sequence specific fashion and contain two or more tandem HMG boxes. Class II members include non-histone...; cd01390][HMGB-UBF_HMG-box, class II and III members of the HMG-box superfamily of DNA-binding proteins. These proteins bind the minor groove …	[order(11,13..14,16..17,20..21,24,28,43,46,49,68)][30][35][65][order(97,99..100,102..103,106..107,110,114,127,130,133,][134]	[DNA binding][acetylation][phosphorylation][modified][DNA binding][phosphorylation]	[DNA binding site [nucleotide binding]][N6-acetyllysine; propagated from UniProtKB/Swiss-Prot (P26583.2)][][proteolytic cleavage site][DNA binding site [nucleotide binding]][]				1	NP_002120.1	522	NP_002120.1	high mobility group protein B2 [Homo sapiens]	0	0	0	0	0	0	0	0	0	0	0	0	0	0	0	0	0	0	0	0.0071401	0.0579143	0.0157533	0.0138403	0.0299662	0.0181847	0.0180736
272	o	3	0.088	Q	14	HNRNPM		19		[41..70][72..147][74..144][205..276][206..279][400..608][654..730][655..724]	[HnRNP_M][RRM1_hnRNPM][RRM][RRM][RRM2_hnRNPM_like][27 X 6 AA repeats of [GEVSTPAN]-[ILMV]-[DE]-[RH]-[MLVI]-[GAV]][RRM3_hnRNPM][RRM]	[Heterogeneous nuclear ribonucleoprotein M; pfam11532][RNA recognition motif 1 in vertebrate heterogeneous nuclear ribonucleoprotein M (hnRNP M); cd12657][RNA recognition motif; smart00360][RNA recognition motif; smart00360][RNA recognition motif 2 in heterogeneous nuclear ribonucleoprotein M (hnRNP M) and similar proteins; cd12386][propagated from UniProtKB/Swiss-Prot (P52272.3)][RNA recognition…	[2][29][277][432][452][468][481][528][575][588][618][618][633][637][698][701]	[acetylation][phosphorylation][acetylation][phosphorylation][phosphorylation][phosphorylation][phosphorylation][phosphorylation][phosphorylation][phosphorylation][phosphorylation][phosphorylation][phosphorylation][phosphorylation][acetylation][phosphorylation]	[N-acetylalanine; propagated from UniProtKB/Swiss-Prot (P52272.3)][Phosphoserine; propagated from UniProtKB/Swiss-Prot (P52272.3)][N6-acetyllysine; propagated from UniProtKB/Swiss-Prot (P52272.3)][Phosphoserine; propagated from UniProtKB/Swiss-Prot (P52272.3)][Phosphoserine; propagated from UniProtKB/Swiss-Prot (P52272.3)][Phosphoserine; propagated from UniProtKB/Swiss-Prot (P52272.3)][Phosphoser…				2	NP_005959.2;NP_112480.2	524	NP_005959.2	0 genes:. 2 proteins in this group did not match any genes. NP_005959.2:heterogeneous nuclear ribonucleoprotein M isoform a [Homo sapiens] ;NP_112480.2:heterogeneous nuclear ribonucleoprotein M isoform b [Homo sapiens] ;	0	0	0	0	0.00367403	0.00180124	0	0.00375535	0	0.00090476	0	0	0	0.0008545	0	0	0	0	0	0.00051025	0	0.00070499	0.00063236	0	0	0
273	o	19	0.1	Q	19	ARG1		6	3.5.3.1	[9..303][126..130][137..139]	[Arginase-like][Substrate binding][Substrate binding]	[Arginase types I and II and arginase-like family; cd11587][propagated from UniProtKB/Swiss-Prot (P05089.2)][propagated from UniProtKB/Swiss-Prot (P05089.2)]	[order(14,17,25..26,29,32,49,52..53,242,246,250,254..255,][order(101,124,126,128,141,232,234,277)][order(101,124,126,128,232,234)]	[other][active][other]	[oligomer interface [polypeptide binding]][][Mn binding site [ion binding]]				2	NP_000036.2;NP_001231367.1	525	NP_000036.2	0 genes:. 2 proteins in this group did not match any genes. NP_000036.2:arginase-1 isoform 2 [Homo sapiens] ;NP_001231367.1:arginase-1 isoform 1 [Homo sapiens] ;	0	0	0	0	0	0	0	0	0	0	0	0	0	0	0	0.00130338	0	0	0	0.00057839	0	0	9.557e-05	0	0	0
274	o	16	0.087	Q	26	YBX1		1		[15..71][61..127]	[Interaction with ss-DNA][CSP_CDS]	[propagated from UniProtKB/Swiss-Prot (P67809.3)][Cold-Shock Protein (CSP) contains an S1-like cold-shock domain (CSD) that is found in eukaryotes, prokaryotes, and archaea. CSP's include the major cold-shock proteins CspA and CspB in bacteria and the eukaryotic gene regulatory factor Y-box protein; cd04458]	[2][order(65,74,85,118)][order(71..77,84..87)][102][102][162][162][165][165][167][167][174][174][176][176][219..220][301][304][314]	[acetylation][DNA binding][other][phosphorylation][phosphorylation][phosphorylation][phosphorylation][phosphorylation][phosphorylation][phosphorylation][phosphorylation][phosphorylation][phosphorylation][phosphorylation][phosphorylation][cleavage][acetylation][acetylation][phosphorylation]	[N-acetylserine. {ECO:0000244|PubMed:19413330, ECO:0000269|Ref.6}; propagated from UniProtKB/Swiss-Prot (P67809.3)][DNA-binding site [nucleotide binding]][RNA-binding motif][][Phosphoserine, by PKB/AKT1. {ECO:0000244|PubMed:19690332, ECO:0000269|PubMed:15806160}; propagated from UniProtKB/Swiss-Prot (P67809.3)][][Phosphotyrosine. {ECO:0000244|PubMed:15592455}; propagated from UniProtKB/Swiss-Prot…				1	NP_004550.2	528	NP_004550.2	nuclease-sensitive element-binding protein 1 [Homo sapiens]	0	0	0	0	0	0	0	0	0	0	0	0	0	0	0	0.00259068	0	0.0118465	0.00729267	0.00182027	0	0.00052947	0	0	0	0
275						RBM6		3		[132..218][136..211][527..573]	[RRM2_RBM6][RRM_6][G_patch]	[RNA recognition motif 2 in vertebrate RNA-binding protein 6 (RBM6); cd12563][RNA recognition motif (a.k.a. RRM, RBD, or RNP domain); pfam14259][glycine rich nucleic binding domain; smart00443]							2	NP_001161054.1;NP_005768.1	529	NP_001161054.1	0 genes:. 2 proteins in this group did not match any genes. NP_001161054.1:RNA-binding protein 6 isoform 2 [Homo sapiens] ;NP_005768.1:RNA-binding protein 6 isoform 1 [Homo sapiens] ;	0	0	0	0	0	0	0	0	0	0	0	0	0	0	0	0	0	0	0	0	0	0	5.121e-05	0	0	0
276	o	19	0.237	Q	19	HSPA1L		6		[4..641][8..383]	[PTZ00009][HSPA1-2_6-8-like_NBD]	[heat shock 70 kDa protein; Provisional][Nucleotide-binding domain of HSPA1-A, -B, -L, HSPA-2, -6, -7, -8, and similar proteins; cd10233]	[order(12,14..17,73,149,177,201..206,208,232..233,270,][order(25,27,29,34..36,38,52,56,59,135..136,260,264,271,][order(35,37,59,62..63,259..260,263..264,267..268,271,][order(154,194,215,217..219,221..222,327)]	[other][other][other][other]	[nucleotide binding site [chemical binding]][NEF/HSP70 interaction site [polypeptide binding]][BAG/HSP70 interaction site [polypeptide binding]][SBD interface [polypeptide binding]]				1	NP_005518.3	531	NP_005518.3	heat shock 70 kDa protein 1-like [Homo sapiens]	0	0	0	0	0.00156906	0	0	0	0.00065502	0	0	0.00644636	0	0	0.00436404	0	0	0	0	0	0	0	0	0	0.00084703	0.00073662
277	o	20	0.137	Q	20	DYNC1LI1		3		[43..519]	[DLIC]	[Dynein light intermediate chain (DLIC); pfam05783]	[74..81][order(77..78,80..82)][207][213][245..248][286..288][398][405][408][419][421][487][510][512][513][515][516]	[other][other][phosphorylation][phosphorylation][other][other][phosphorylation][phosphorylation][phosphorylation][phosphorylation][phosphorylation][phosphorylation][phosphorylation][phosphorylation][phosphorylation][phosphorylation][phosphorylation]	[Walker A/P-loop][ATP binding site [chemical binding]][Phosphoserine. {ECO:0000244|PubMed:17081983, ECO:0000244|PubMed:18220336, ECO:0000244|PubMed:18669648, ECO:0000244|PubMed:18691976, ECO:0000244|PubMed:19690332, ECO:0000244|PubMed:20068231, ECO:0000244|PubMed:21406692, ECO:0000244|PubMed:24275569, ECO:0000269|PubMed:19229290}; propagated from UniProtKB/Swiss-Prot (Q9Y6G9.3)][Phosphothreonine.…				1	NP_057225.2	536	NP_057225.2	cytoplasmic dynein 1 light intermediate chain 1 isoform 1 [Homo sapiens]	0	0	0	0	0	0.00041903	0	0	0	0	0	0	0	0	0	0	0	0	0	0	0	0	0	0	0	0
278	o	4	0.092	Q	20	SH3BGRL3		1		[4..92]	[GRX_SH3BGR]	[Glutaredoxin (GRX) family, SH3BGR (SH3 domain binding glutamic acid-rich protein) subfamily; a recently-identified subfamily composed of SH3BGR and similar proteins possessing significant sequence similarity to GRX, but without a redox active CXXC motif; cd03030]	[2]	[acetylation]	[N-acetylserine. {ECO:0000244|PubMed:19413330}; propagated from UniProtKB/Swiss-Prot (Q9H299.1)]				1	NP_112576.1	540	NP_112576.1	SH3 domain-binding glutamic acid-rich-like protein 3 [Homo sapiens]	0	0	0	0	0	0	0	0	0	0	0	0	0	0	0	0	0	0	0	0.0020026	0	0	0	0	0	0
279	o	32	0.034	Q	32	SP100		2		[47..150][165..168][284..297][333..478][536..553][568..592][595..676][<699..750][717..734][769..>818]	[Sp100][D-box, recognition signal for CDC20-mediated degradation][PxVxL motif][Sufficient to mediate interaction with ETS1][Nuclear localization signal (Potential)][Nuclear localization signal (Potential)][SAND][HMGB-UBF_HMG-box][Nuclear localization signal (Potential)][HMGB-UBF_HMG-box]	[Sp100 domain; pfam03172][propagated from UniProtKB/Swiss-Prot (P23497.3)][propagated from UniProtKB/Swiss-Prot (P23497.3)][propagated from UniProtKB/Swiss-Prot (P23497.3)][propagated from UniProtKB/Swiss-Prot (P23497.3)][propagated from UniProtKB/Swiss-Prot (P23497.3)][SAND domain; pfam01342][HMGB-UBF_HMG-box, class II and III members of the HMG-box superfamily of DNA-binding proteins. These pro…	[2][18][18][157][157][171][327][328][331][331][334][335][362][407][407][409][409][410][410][419][420][451][452][453][456][459][467][469][470][471][order(771,773..774,776..777,780..781,784,788,801,804,807)]	[acetylation][phosphorylation][phosphorylation][phosphorylation][phosphorylation][phosphorylation][phosphorylation][phosphorylation][phosphorylation][phosphorylation][phosphorylation][phosphorylation][phosphorylation][phosphorylation][phosphorylation][phosphorylation][phosphorylation][phosphorylation][phosphorylation][phosphorylation][phosphorylation][phosphorylation][phosphorylation][phosphoryla…	[N-acetylalanine; propagated from UniProtKB/Swiss-Prot (P23497.3)][][Phosphoserine; propagated from UniProtKB/Swiss-Prot (P23497.3)][][Phosphoserine; propagated from UniProtKB/Swiss-Prot (P23497.3)][Phosphoserine; propagated from UniProtKB/Swiss-Prot (P23497.3)][][][][Phosphoserine; propagated from UniProtKB/Swiss-Prot (P23497.3)][][][Phosphoserine; propagated from UniProtKB/Swiss-Prot (P23497.3)…				1	NP_003104.2	541	NP_003104.2	nuclear autoantigen Sp-100 isoform 2 [Homo sapiens]	0	0	0	0	0	0	0	0	0	0	0	0	0	0	0	0	0	0	0	0.0002209	0	0	0.00014782	0	0	0
280						NUP93		16		[88..681]	[Nic96]	[Nup93/Nic96; pfam04097]							2	NP_001229725.1;NP_055484.3	543	NP_001229725.1	0 genes:. 2 proteins in this group did not match any genes. NP_001229725.1:nuclear pore complex protein Nup93 isoform 2 [Homo sapiens] ;NP_055484.3:nuclear pore complex protein Nup93 isoform 1 [Homo sapiens] ;	0	0	0	0	0	0	0	0	0	0	0	0	0	0	0	0.000603	0	0	0	0	0	0	0	0	0	0
281	o560-582i	24	0.772	S	24	MCAM		11		[33..132][139..234][264..322][268..321][354..422][361..410][438..515][450..506]	[Ig][C2-set_2][IGc2][Ig][IG_like][Ig][IG_like][Ig]	[Immunoglobulin domain; cl11960][CD80-like C2-set immunoglobulin domain; pfam08205][Immunoglobulin C-2 Type; smart00408][Immunoglobulin domain; cd00096][Immunoglobulin like; smart00410][Immunoglobulin domain; cd00096][Immunoglobulin like; smart00410][Immunoglobulin domain; cl11960]	[560..583][614][614][628]	[transmembrane region][phosphorylation][phosphorylation][phosphorylation]	[propagated from UniProtKB/Swiss-Prot (P43121.2)][][Phosphoserine; propagated from UniProtKB/Swiss-Prot (P43121.2)][Phosphoserine; propagated from UniProtKB/Swiss-Prot (P43121.2)]				1	NP_006491.2	544	NP_006491.2	cell surface glycoprotein MUC18 precursor [Homo sapiens]	0	0	0	0	0	0	0	0	0	0.0003408	0	0	0	0	0	0	0	0	0	0	0	0	0	0	0	0
282	i7-26o	27	0.882	S	27	CST3		20		[37..143]	[CY]	[Cystatin-like domain; Cystatins are a family of cysteine protease inhibitors that occur mainly as single domain proteins. However some extracellular proteins such as kininogen, His-rich glycoprotein and fetuin also contain these domains; cd00042]	[order(37,81..83,85)]	[other]	[putative proteinase inhibition site]				1	NP_001275543.1	545	NP_001275543.1	cystatin-C precursor [Homo sapiens]	0	0	0	0	0	0	0	0	0	0	0	0	0	0	0	0	0	0	0	0.00127563	0	0	0	0	0	0
283						ALDOA		16	4.1.2.13	[67..397]	[FBP_aldolase_I_a]	[Fructose-1,6-bisphosphate aldolase; cd00948]	[order(88..90,93,162,201,203,242,284,325..327,355,357..358)][order(165,216,219..220,223,227,230,258,262,265,272..273,][284]	[active][other][active]	[][intersubunit interface [polypeptide binding]][catalytic residue [active]]				1	NP_001230106.1	547	NP_001230106.1	fructose-bisphosphate aldolase A isoform 2 [Homo sapiens]	0.00404982	0	0	0	0.017645	0.0225442	0	0.0219899	0.0278162	0.0194876	0.0631874	0.00955498	0	0.00596924	0.0267689	0.0120485	0	0	0.00565269	0.00297037	0.00173476	0.00205201	0.00191422	0.00199774	0.00779346	0.00903678
284	o	18	0.78	S	18	LGMN		14	3.4.22.34	[29..285]	[Peptidase_C13]	[Peptidase C13 family; pfam01650]	[21][25][323]	[modified][modified][modified]	[proteolytic cleavage site][proteolytic cleavage site][proteolytic cleavage site]				1	NP_005597.3	548	NP_005597.3	legumain preproprotein [Homo sapiens]	0	0	0	0	0	0	0	0	0	0	0	0	0	0	0	0	0	0	0	0	0.00055822	0.00013206	0	0	0	0
285	o4049-4071i	19	0.778	S	19	FAT2		5		[37..143][152..247][366..454][462..560][570..659][719..816][825..921][931..1026][1038..1133][1141..1238][1247..1335][1354..1444][1453..1551][1559..1650][1664..1754][1762..1867][1887..1963][<1998..2066][2074..2163][2176..2268][2276..2375][2383..2475][2486..2581][2589..2682][2696..2793][2801..2902][2910..3007][3016..3109][3120..3209][3224..3317][3325..3422][3431..3522][3535..3619][3777..3919][3949.…	[Cadherin_repeat][Cadherin_repeat][Cadherin_repeat][Cadherin_repeat][Cadherin_repeat][Cadherin_repeat][Cadherin_repeat][Cadherin_repeat][Cadherin_repeat][Cadherin_repeat][Cadherin_repeat][Cadherin_repeat][Cadherin_repeat][Cadherin_repeat][Cadherin_repeat][Cadherin_repeat][Cadherin_repeat][Cadherin_repeat][Cadherin_repeat][Cadherin_repeat][Cadherin_repeat][Cadherin_repeat][Cadherin_repeat][Cadheri…	[Cadherin tandem repeat domain; cd11304][Cadherin tandem repeat domain; cd11304][Cadherin tandem repeat domain; cd11304][Cadherin tandem repeat domain; cd11304][Cadherin tandem repeat domain; cd11304][Cadherin tandem repeat domain; cd11304][Cadherin tandem repeat domain; cd11304][Cadherin tandem repeat domain; cd11304][Cadherin tandem repeat domain; cd11304][Cadherin tandem repeat domain; cd11304…	[order(44..45,108,110,140,142..143)][order(159..160,210,212)][order(373..374,422,424,450,452..453)][order(469..470,521,523,556,558..559)][order(575..576,629,631)][order(726..727,779,781,812,814..815)][order(831..832,882,884,917,919..920)][order(936..937,988,990,1022,1024..1025)][order(1043..1044,1096,1098,1129,1131..1132)][order(1148..1149,1201,1203,1234,1236..1237)][order(1360..1361,1409,1411,14…	[other][other][other][other][other][other][other][other][other][other][other][other][other][other][other][other][other][other][other][other][other][other][other][other][other][other][other][other][other][other][other][transmembrane region]	[Ca2+ binding site [ion binding]][Ca2+ binding site [ion binding]][Ca2+ binding site [ion binding]][Ca2+ binding site [ion binding]][Ca2+ binding site [ion binding]][Ca2+ binding site [ion binding]][Ca2+ binding site [ion binding]][Ca2+ binding site [ion binding]][Ca2+ binding site [ion binding]][Ca2+ binding site [ion binding]][Ca2+ binding site [ion binding]][Ca2+ binding site [ion binding]][Ca…				1	NP_001438.1	549	NP_001438.1	protocadherin Fat 2 precursor [Homo sapiens]	0	0	0	0	0	0	0	0	0	0	0	0	0.00619984	0	0	0	0	0	0	0	0	0	0	0	0	0
286	o	32	0.02	Q	0	WNK3		X	2.7.11.1	[136..410][152..405][426..463]	[STKc_WNK3][S_TKc][OSR1_C]	[Catalytic domain of the Serine/Threonine protein kinase, With No Lysine (WNK) 3; cd14031][Serine/Threonine protein kinases, catalytic domain; smart00220][Oxidative-stress-responsive kinase 1 C terminal; pfam12202]	[order(153..157,159,161,174,176,207,227..230,234,236,275,][order(153..157,161,174,176,207,227..230,234,275,277,][order(157,234,236,275,277,279,297,311..314)][293..314]	[active][other][other][other]	[][ATP binding site [chemical binding]][polypeptide substrate binding site [polypeptide binding]][activation loop (A-loop)]				9	NP_001002838.1;NP_001171914.1;NP_001269323.1;NP_006639.3;NP_055638.2;NP_061852.3;NP_065973.2;NP_115763.2;NP_998820.3	550	NP_001002838.1	0 genes:. 9 proteins in this group did not match any genes. NP_001002838.1:serine/threonine-protein kinase WNK3 isoform 2 [Homo sapiens] ;NP_001171914.1:serine/threonine-protein kinase WNK1 isoform 4 [Homo sapiens] ;NP_001269323.1:serine/threonine-protein kinase WNK2 isoform 1 [Homo sapiens] ;NP_006639.3:serine/threonine-protein kinase WNK2 isoform 2 [Homo sapiens] ;NP_055638.2:serine/threonine-p…	0	0	0	0	0	0	0	0	0	0	0.00168371	0	0	0	0	0	0	0	0	0	0	0	0	0	0	0
288	o	5	0.113	Q	17	EXOC8		1		[17..101][176..288]	[Vps51][PH_RalBD_exo84]	[Vps51/Vps67; pfam08700][Exocyst complex 84-kDa subunit Ral-binding domain/Pleckstrin Homology (PH) domain; cd01226]	[142][order(176..222,225..288)][order(194..195,197,233..242,244,252,254..256,278,281,285,]	[phosphorylation][other][other]	[Phosphothreonine. {ECO:0000269|PubMed:18669648}; propagated from UniProtKB/Swiss-Prot (Q8IYI6.2)][homodimer interface [polypeptide binding]][RalA binding site [polypeptide binding]]				1	NP_787072.2	556	NP_787072.2	exocyst complex component 8 [Homo sapiens]	0	0	0	0	0	0	0	0	0	0.00030367	0	0	0	0	0	0	0	0	0	0	0	0	0	0	0	0
289						MGMT		10	2.1.1.63	[37..121][38..204][125..204]	[Methyltransf_1N][AdaB][ATase]	[6-O-methylguanine DNA methyltransferase, ribonuclease-like domain; pfam02870][O6-methylguanine-DNA--protein-cysteine methyltransferase [Replication, recombination and repair]; COG0350][The DNA repair protein O6-alkylguanine-DNA alkyltransferase (ATase; also known as AGT, AGAT and MGMT) reverses O6-alkylation DNA damage by transferring O6-alkyl adducts to an active site cysteine irreversibly, wit…	[order(125..126,145..146,154,157,159..160,162,165..166,168,][order(145,176..177,179,203)]	[DNA binding][active]	[DNA binding site [nucleotide binding]][]				1	NP_002403.2	557	NP_002403.2	methylated-DNA--protein-cysteine methyltransferase [Homo sapiens]	0	0	0	0	0	0	0	0	0	0	0	0	0	0	0	0	0	0	0	0	0	0.00024026	0.00025861	0	0	0
290						ATAD3A		1		[42..286][329..475][346..476]	[DUF3523][AAA][AAA]	[Domain of unknown function (DUF3523); pfam12037][The AAA+ (ATPases Associated with a wide variety of cellular Activities) superfamily represents an ancient group of ATPases belonging to the ASCE (for additional strand, catalytic E) division of the P-loop NTPase fold. The ASCE division also includes ABC; cd00009][ATPases associated with a variety of cellular activities; smart00382]	[352..359][order(353..360,411,454)][407..412][466]	[other][other][other][other]	[Walker A motif][ATP binding site [chemical binding]][Walker B motif][arginine finger]				3	NP_001164006.1;NP_001164007.1;NP_060658.3	558	NP_001164006.1	0 genes:. 3 proteins in this group did not match any genes. NP_001164006.1:ATPase family AAA domain-containing protein 3A isoform 2 [Homo sapiens] ;NP_001164007.1:ATPase family AAA domain-containing protein 3A isoform 3 [Homo sapiens] ;NP_060658.3:ATPase family AAA domain-containing protein 3A isoform 1 [Homo sapiens] ;	0	0	0	0	0	0	0	0	0	0	0	0.00035872	0	0	0	0	0	0	0	0	0	0	0	0	0	0
291	o698-720i819-841o	30	0.633	S	30	PCDHA9		5		[32..129][139..238][247..346][356..451][459..561][595..670]	[Cadherin_repeat][Cadherin_repeat][Cadherin_repeat][Cadherin_repeat][Cadherin_repeat][Cadherin_repeat]	[Cadherin tandem repeat domain; cd11304][Cadherin tandem repeat domain; cd11304][Cadherin tandem repeat domain; cd11304][Cadherin tandem repeat domain; cd11304][Cadherin tandem repeat domain; cd11304][Cadherin tandem repeat domain; cd11304]	[order(37..38,91,93,125,127..128)][order(144..145,201,203,234,236..237)][order(253..254,309,311,342,344..345)][order(361..362,414,416,447,449..450)][order(466..467,524,526,557,559..560)][698..718]	[other][other][other][other][other][transmembrane region]	[Ca2+ binding site [ion binding]][Ca2+ binding site [ion binding]][Ca2+ binding site [ion binding]][Ca2+ binding site [ion binding]][Ca2+ binding site [ion binding]][propagated from UniProtKB/Swiss-Prot (Q9Y5H5.1)]				2	NP_054724.1;NP_114063.1	559	NP_054724.1	0 genes:. 2 proteins in this group did not match any genes. NP_054724.1:protocadherin alpha-9 isoform 2 precursor [Homo sapiens] ;NP_114063.1:protocadherin alpha-9 isoform 1 precursor [Homo sapiens] ;	0	0	0	0	0	0	0.166136	0	0	0	0	0	0	0	0	0	0	0	0	0	0	0	0	0	0	0
292	o	23	0.832	S	23	CLU		8		[23..227][29..449][78..81][228..443][443..447]	[CLb][Clusterin][Nuclear localization signal (By similarity)][CLa][Nuclear localization signal (By similarity)]	[CLUSTERIN Beta chain; smart00030][Clusterin; pfam01093][propagated from UniProtKB/Swiss-Prot (P10909.1)][CLUSTERIN alpha chain; smart00035][propagated from UniProtKB/Swiss-Prot (P10909.1)]							1	NP_001822.3	560	NP_001822.3	clusterin preproprotein [Homo sapiens]	0	0	0	0	0	0	0	0	0	0	0	0	0	0	0	0	0	0	0	0.00013826	0	0	0	0	0	0
293	o	43	0.044	Q	0	ASH2L		8		[7..56][298..489]	[PHD_ash2p_like][SPRY_Ash2]	[PHD finger found in Schizosaccharomyces pombe Set1 complex component ash2 (spAsh2p) and similar proteins; cd15583][SPRY domain in Ash2; cd12872]	[order(7,19..23,27,51)][order(8,10,23,26,31,34,53,56)]	[other][other]	[putative histone H3 binding site [polypeptide binding]][Zn binding site [ion binding]]				4	NP_001098684.1;NP_001248761.1;NP_001269201.1;NP_004665.2	561	NP_001098684.1	0 genes:. 4 proteins in this group did not match any genes. NP_001098684.1:set1/Ash2 histone methyltransferase complex subunit ASH2 isoform b [Homo sapiens] ;NP_001248761.1:set1/Ash2 histone methyltransferase complex subunit ASH2 isoform c [Homo sapiens] ;NP_001269201.1:set1/Ash2 histone methyltransferase complex subunit ASH2 isoform d [Homo sapiens] ;NP_004665.2:set1/Ash2 histone methyltransfera…	0	0	0	0	0	0	0	0	0	0	0	0	0	0	0	0	0	0	0	0	0	0	5.763e-05	0	0	0
294						KRT77		12		[1..163][163..476][164..474][164..200][201..219][220..311][312..335][336..474][371..>459][475..578]	[Head][Filament][Rod][Coil 1A][Linker 1][Coil 1B][Linker 12][Coil 2][Phage_GP20][Tail]	[propagated from UniProtKB/Swiss-Prot (Q7Z794.3)][Intermediate filament protein; pfam00038][propagated from UniProtKB/Swiss-Prot (Q7Z794.3)][propagated from UniProtKB/Swiss-Prot (Q7Z794.3)][propagated from UniProtKB/Swiss-Prot (Q7Z794.3)][propagated from UniProtKB/Swiss-Prot (Q7Z794.3)][propagated from UniProtKB/Swiss-Prot (Q7Z794.3)][propagated from UniProtKB/Swiss-Prot (Q7Z794.3)][Phage minor s…	[418]	[other]	[Stutter; propagated from UniProtKB/Swiss-Prot (Q7Z794.3)]				1	NP_778253.2	562	NP_778253.2	keratin, type II cytoskeletal 1b [Homo sapiens]	0	0	0	0	0	0.00115394	0	0	0.00290567	0.00077619	0	0	0	0	0	0	0	0	0	0	0	0	0	0	0	0
295	o	14	0.033	Q	0	CWC27		5	5.2.1.8	[8..178]	[cyclophilin_CeCYP16-like]	[cyclophilin_CeCYP16-like: cyclophilin-type peptidylprolyl cis- trans isomerase) (PPIase) domain similar to Caenorhabditis elegans cyclophilin 16. C. elegans CeCYP-16, compared to the archetypal cyclophilin Human cyclophilin A has, a reduced...; cd01925]	[2][order(55..56,61,112,114,122)][346]	[acetylation][active][phosphorylation]	[N-acetylserine. {ECO:0000244|PubMed:19413330}; propagated from UniProtKB/Swiss-Prot (Q6UX04.1)][][Phosphoserine. {ECO:0000250|UniProtKB:Q5XIB2}; propagated from UniProtKB/Swiss-Prot (Q6UX04.1)]				1	NP_005860.2	563	NP_005860.2	peptidyl-prolyl cis-trans isomerase CWC27 homolog isoform 1 [Homo sapiens]	0	0	0	0	0	0	0	0	0	0	0	0	0	0	0	0	0	0	0	0.00052611	0	0	0	0	0	0
296	o	34	0.014	Q	0	PCNP		3		[22..167]	[PCNP]	[PEST, proteolytic signal-containing nuclear protein family; pfam15473]	[2][64][87][119][119][139][147][150][152]	[acetylation][acetylation][phosphorylation][phosphorylation][phosphorylation][phosphorylation][phosphorylation][acetylation][acetylation]	[N-acetylalanine. {ECO:0000269|PubMed:20154145}; propagated from UniProtKB/Swiss-Prot (Q8WW12.2)][N6-acetyllysine. {ECO:0000244|PubMed:19608861}; propagated from UniProtKB/Swiss-Prot (Q8WW12.2)][Phosphoserine. {ECO:0000244|PubMed:18669648}; propagated from UniProtKB/Swiss-Prot (Q8WW12.2)][][Phosphoserine. {ECO:0000244|PubMed:18669648, ECO:0000244|PubMed:21406692}; propagated from UniProtKB/Swiss-…				1	NP_065090.1	564	NP_065090.1	PEST proteolytic signal-containing nuclear protein isoform a [Homo sapiens]	0	0	0	0	0	0	0	0	0	0	0	0	0	0	0	0	0	0	0	0.0118581	0.0108634	0.00192751	0	0	0	0
297	o	2	0.041	Q	0	APEX1		14	4.2.99.18	[2..33][8..13][23..33][62..316][64..80][289..318]	[Necessary for interaction with YBX1, binding to RNA, NPM1-dependent association with rRNA, endoribonuclease activity on abasic RNA and localization in the nucleoli][Nuclear localization signal (NLS)][Necessary for interaction with NPM1 and for efficient rRNA binding][Ape1-like_AP-endo][Nuclear export signal (NES)][Mitochondrial targeting sequence (MTS)]	[propagated from UniProtKB/Swiss-Prot (P27695.2)][propagated from UniProtKB/Swiss-Prot (P27695.2)][propagated from UniProtKB/Swiss-Prot (P27695.2)][Human Ape1-like subfamily of the ExoIII family purinic/apyrimidinic (AP) endonucleases; cd09087][propagated from UniProtKB/Swiss-Prot (P27695.2)][propagated from UniProtKB/Swiss-Prot (P27695.2)]	[6][6][7][7][27][31..32][31][31][32][35][65][order(68,70..74,78,96,98,103,127..128,171,174,210,212,222,][order(68,70..74,78,96,98,103,127..128,171,174,210,212,222,][order(68,96,171,174,210,212,309)][order(68,96,171,210,212,283,308..309)][order(70,96,308)][93][123][order(171,174,210,212,230,266,280,282,309)][197][order(210,212,309)][212][233][262][283][309][310]	[acetylation][acetylation][acetylation][acetylation][acetylation][cleavage][acetylation][modified][acetylation][acetylation][nitrosylation][active][DNA binding][other][active][metal-binding][nitrosylation][phosphorylation][other][acetylation][metal-binding][other][phosphorylation][phosphorylation][other][other][nitrosylation]	[][N6-acetyllysine, by EP300. {ECO:0000269|PubMed:14633989}; propagated from UniProtKB/Swiss-Prot (P27695.2)][][N6-acetyllysine, by EP300. {ECO:0000269|PubMed:14633989}; propagated from UniProtKB/Swiss-Prot (P27695.2)][N6-acetyllysine. {ECO:0000269|PubMed:20699270}; propagated from UniProtKB/Swiss-Prot (P27695.2)][Cleavage, by granzyme A; propagated from UniProtKB/Swiss-Prot (P27695.2)][N6-acetyl…				1	NP_542380.1	566	NP_542380.1	DNA-(apurinic or apyrimidinic site) lyase [Homo sapiens]	0	0	0	0	0	0	0	0	0	0	0	0	0	0	0	0	0	0	0	0.00039044	0.00304038	0.00197802	0.0003871	0.00131298	0	0
298	o	19	0.051	Q	19	TUBB2B		6		[1..430][2..426]	[PLN00220][beta_tubulin]	[tubulin beta chain; Provisional][The beta-tubulin family; cd02187]	[order(2,131,245..247,251,256,258..260,322..324,327,][order(10..12,15,138,140..144,181,204,222,226)][order(22..23,26..27,215,224,227..228,234,270,272..274,][40][55][58][58][order(70..71,98..100,103,179,181,222)][172][318]	[other][other][other][phosphorylation][phosphorylation][acetylation][modified][other][phosphorylation][methylation]	[beta/alpha domain interface [polypeptide binding]][nucleotide binding site [chemical binding]][Taxol binding site [chemical binding]][Phosphoserine. {ECO:0000250|UniProtKB:P99024}; propagated from UniProtKB/Swiss-Prot (Q9BVA1.1)][Phosphothreonine. {ECO:0000250|UniProtKB:Q3KRE8}; propagated from UniProtKB/Swiss-Prot (Q9BVA1.1)][N6-acetyllysine, alternate. {ECO:0000250|UniProtKB:P07437}; propagate…				1	NP_821080.1	567	NP_821080.1	tubulin beta-2B chain [Homo sapiens]	0	0	0	0	0.00100451	0.00130505	0	0.00012079	0.00062902	0.00148228	0.00219828	0.0089	0	0	0.0220016	0.0041526	0	0	0	0	0	0	0	0	0.0012201	0
299						DPYSL2		8		[122..576][122..571]	[D-hydantoinase][D-HYD]	[D-hydantoinase; TIGR02033][D-hydantoinases (D-HYD) also called dihydropyrimidases (DHPase) and related proteins; DHPases are a family of enzymes that catalyze the reversible hydrolytic ring opening of the amide bond in five- or six-membered cyclic diamides, like dihydropyrimidine...; cd01314]	[order(133..134,136,149..150,285,306,309,312,335,339,343,][order(178,180,270,303,359,437)]	[other][active]	[tetramer interface [polypeptide binding]][]				3	NP_001184222.1;NP_001231533.1;NP_001377.1	569	NP_001184222.1	0 genes:. 3 proteins in this group did not match any genes. NP_001184222.1:dihydropyrimidinase-related protein 2 isoform 1 [Homo sapiens] ;NP_001231533.1:dihydropyrimidinase-related protein 2 isoform 3 [Homo sapiens] ;NP_001377.1:dihydropyrimidinase-related protein 2 isoform 2 [Homo sapiens] ;	0	0	0	0	0	0	0	0	0	0	0	0	0	0	0	0.00123985	0	0	0	0	0	0	0	0	0	0
301	o	24	0.16	Q	24	RBM27		5		[277..299][599..674][602..668][971..1013]	[zf-CCCH][RRM_RBM27][RRM_6][RRM_SF]	[Zinc finger C-x8-C-x5-C-x3-H type (and similar); pfam00642][RNA recognition motif of vertebrate RNA-binding protein 27 (RBM27); cd12517][RNA recognition motif (a.k.a. RRM, RBD, or RNP domain); pfam14259][RNA recognition motif (RRM) superfamily; cl17169]	[447][1020]	[phosphorylation][phosphorylation]	[Phosphothreonine. {ECO:0000269|PubMed:16964243, ECO:0000269|PubMed:18220336, ECO:0000269|PubMed:20068231, ECO:0000269|PubMed:24275569}; propagated from UniProtKB/Swiss-Prot (Q9P2N5.2)][Phosphoserine. {ECO:0000269|PubMed:18669648}; propagated from UniProtKB/Swiss-Prot (Q9P2N5.2)]				1	NP_061862.1	572	NP_061862.1	RNA-binding protein 27 [Homo sapiens]	0	0	0	0	0	0	0	0	0	0	0	0	0	0	0	0	0	0	0	0	0.00022803	0	2.903e-05	0	0	0
303	o	22	0.07	Q	38	YLPM1		14		[1836..1988][1836..>1887]	[AAA_33][AAA_17]	[AAA domain; pfam13671][AAA domain; pfam13207]	[1119]	[phosphorylation]					1	NP_062535.2	576	NP_062535.2	YLP motif-containing protein 1 [Homo sapiens]	0	0	0	0	0	0	0	0	0	0	0	0	0	0	0	0.00078227	0	0	0	0	0	0	0	0	0	0
304	o	31	0.068	Q	31	RBM14		11		[1..71][2..68][79..146][80..144][307..354]	[RRM1_CoAA][RRM][RRM2_CoAA][RRM][TRBP-interacting domain]	[RNA recognition motif 1 in vertebrate RRM-containing coactivator activator/modulator (CoAA); cd12608][RNA recognition motif; smart00360][RNA recognition motif 2 in vertebrate RRM-containing coactivator activator/modulator (CoAA); cd12609][RNA recognition motif; smart00360][propagated from UniProtKB/Swiss-Prot (Q96PK6.2)]	[161][161][206][206][206][215][220][220][226][256][562][562][572][572][582][587][588][618][618][620][629]	[phosphorylation][phosphorylation][phosphorylation][phosphorylation][phosphorylation][phosphorylation][phosphorylation][phosphorylation][phosphorylation][phosphorylation][phosphorylation][phosphorylation][phosphorylation][phosphorylation][phosphorylation][phosphorylation][phosphorylation][phosphorylation][phosphorylation][phosphorylation][phosphorylation]	[][Phosphoserine; propagated from UniProtKB/Swiss-Prot (Q96PK6.2)][][][Phosphothreonine; propagated from UniProtKB/Swiss-Prot (Q96PK6.2)][][][Phosphoserine; propagated from UniProtKB/Swiss-Prot (Q96PK6.2)][][Phosphoserine; propagated from UniProtKB/Swiss-Prot (Q96PK6.2)][][Phosphoserine; propagated from UniProtKB/Swiss-Prot (Q96PK6.2)][][Phosphothreonine; propagated from UniProtKB/Swiss-Prot (Q96…				1	NP_006319.1	578	NP_006319.1	RNA-binding protein 14 isoform 1 [Homo sapiens]	0	0	0	0	0	0	0	0	0	0	0	0	0	0	0	0	0	0	0	0.00027839	0.0007226	0.00051285	0.000184	0.00249643	0.00486946	0.0225852
305						KDM1A		1		[194..284][303..>351][308..849][<391..505]	[SWIRM][NAD_binding_8][Amino_oxidase][SurA_N_3]	[SWIRM domain; pfam04433][NAD(P)-binding Rossmann-like domain; pfam13450][Flavin containing amine oxidoreductase; pfam01593][SurA N-terminal domain; cl21568]	[88][126][131][137][166][order(305..307,309,327)]	[phosphorylation][phosphorylation][phosphorylation][phosphorylation][phosphorylation][other]	[][][][][][NAD binding site [chemical binding]]				2	NP_001009999.1;NP_055828.2	579	NP_001009999.1	0 genes:. 2 proteins in this group did not match any genes. NP_001009999.1:lysine-specific histone demethylase 1A isoform a [Homo sapiens] ;NP_055828.2:lysine-specific histone demethylase 1A isoform b [Homo sapiens] ;	0	0	0	0	0	0.00075051	0	0	0	0	0	0	0	0	0	0	0	0	0	0	0	0	0	0	0	0
306	o	34	0.043	Q	34	NONO		X		[<1..54][60..139][130..222]	[RRM_SF][RRM_SF][NOPS_p54nrb_PSF_PSPC1]	[RNA recognition motif (RRM) superfamily; cl17169][RNA recognition motif (RRM) superfamily; cl17169][NOPS domain, including C-terminal coiled-coil region, in p54nrb/PSF/PSPC1 family proteins; cd12946]	[order(130..132,134,174..175,177..179,181..183,185..186,]	[other]	[heterodimer interface [polypeptide binding]]				1	NP_001138882.1	581	NP_001138882.1	non-POU domain-containing octamer-binding protein isoform 2 [Homo sapiens]	0	0	0	0	0	0	0	0	0	0	0	0	0	0.0179624	0	0.00930633	0	0	0	0.00048754	0	0.00014969	0.00048337	0	0	0
307	o	18	0.101	Q	26	UBE2N		12	2.3.2.23	[3..150][5..144]	[COG5078][UBCc]	[Ubiquitin-protein ligase [Posttranslational modification, protein turnover, chaperones]][Ubiquitin-conjugating enzyme E2, catalytic (UBCc) domain. This is part of the ubiquitin-mediated protein degradation pathway in which a thiol-ester linkage forms between a conserved cysteine and the C-terminus of ubiquitin and complexes with ubiquitin...; cd00195]	[order(6,63..64,97..98)][order(74..75,79..80,82,86..88,90..91,95..96,99,104,107,][82][87]	[other][other][acetylation][active]	[E3 interaction residues][Ub thioester intermediate interaction residues][N6-acetyllysine. {ECO:0000244|PubMed:19608861}; propagated from UniProtKB/Swiss-Prot (P61088.1)][active site cysteine]				1	NP_003339.1	583	NP_003339.1	ubiquitin-conjugating enzyme E2 N [Homo sapiens]	0	0	0	0	0	0	0	0	0	0	0	0	0	0	0	0	0	0	0	0	0	0.0003762	0.0006074	0	0	0
308	o	19	0.06	Q	19	TUBB4B		9		[1..427][2..426]	[PLN00220][beta_tubulin]	[tubulin beta chain; Provisional][The beta-tubulin family; cd02187]	[order(2,131,245..247,251,256,258..260,322..324,327,][order(10..12,15,138,140..144,181,204,222,226)][order(22..23,26..27,215,224,227..228,234,270,272..274,][55][58][order(70..71,98..100,103,179,181,222)][172][172]	[other][other][other][phosphorylation][acetylation][other][phosphorylation][phosphorylation]	[beta/alpha domain interface [polypeptide binding]][nucleotide binding site [chemical binding]][Taxol binding site [chemical binding]][Phosphothreonine. {ECO:0000250|UniProtKB:Q6P9T8}; propagated from UniProtKB/Swiss-Prot (P68371.1)][N6-acetyllysine. {ECO:0000244|PubMed:19608861}; propagated from UniProtKB/Swiss-Prot (P68371.1)][alpha/beta domain interface [polypeptide binding]][][Phosphoserine, …				1	NP_006079.1	586	NP_006079.1	tubulin beta-4B chain [Homo sapiens]	0	0	0	0	0.0120541	0.00664135	0	0.00614878	0.0163545	0.010542	0.00329742	0.00616966	0	0.0135504	0.0125723	0.010554	0	0	0	0.00223212	0.00108634	6.425e-05	0	0	0	0
309	o	23	0.107	Q	23	NSD1		5	2.1.1.43	[319..429][<1431..1587][1545..1587][1592..1638][1639..1692][1709..1748][1754..1848][1891..1941][1942..2065][1952..1954][1994..1997][2020..2021][2060..2066][2120..2162]	[MSH6_like][TNG2][PHD1_NSD1_2][PHD2_NSD1][PHD3_NSD1][PHD4_NSD1][WHSC1_related][AWS][SET][S-adenosyl-L-methionine binding][S-adenosyl-L-methionine binding][S-adenosyl-L-methionine binding][Inhibits enzyme activity in the absence of bound histone][PHD5_NSD1]	[The PWWP domain is present in MSH6, a mismatch repair protein homologous to bacterial MutS. The PWWP domain of histone-lysine N-methyltransferase, also known as Nuclear SET domain-containing protein 3, is also included. Mutations in MSH6 have been...; cd05837][Chromatin remodeling protein, contains PhD zinc finger [Chromatin structure and dynamics]; COG5034][PHD finger 1 found in nuclear recepto…	[order(331,334,337,368,372,374)][483][486][766][order(1545,1554..1558,1563,1581)][order(1546,1549,1558,1562,1567,1570,1583,1586)][order(1592,1602..1606,1612,1633)][order(1593,1596,1606,1611,1616,1619,1635,1638)][order(1639,1657..1661,1665,1687)][order(1640,1643,1661,1664,1669,1674,1689,1692)][order(1709,1718..1722,1726,1743)][order(1710,1713,1722,1725,1730,1733,1745,1748)][order(1764,1767,1770,17…	[other][phosphorylation][phosphorylation][phosphorylation][other][other][other][other][other][other][other][other][other][other][other][phosphorylation][phosphorylation][phosphorylation]	[putative chromatin binding site][Phosphoserine; propagated from UniProtKB/Swiss-Prot (Q96L73.1)][Phosphoserine; propagated from UniProtKB/Swiss-Prot (Q96L73.1)][Phosphoserine; propagated from UniProtKB/Swiss-Prot (Q96L73.1)][putative histone H3 binding site [polypeptide binding]][Zn binding site [ion binding]][putative histone H3 binding site [polypeptide binding]][Zn binding site [ion binding]]…				2	NP_071900.2;NP_758859.1	587	NP_071900.2	0 genes:. 2 proteins in this group did not match any genes. NP_071900.2:histone-lysine N-methyltransferase, H3 lysine-36 and H4 lysine-20 specific isoform b [Homo sapiens] ;NP_758859.1:histone-lysine N-methyltransferase, H3 lysine-36 and H4 lysine-20 specific isoform a [Homo sapiens] ;	0	0	0	0	0	0	0	0	0	0	0	0	0	0	0	0	0	0	0	0	0	2.121e-05	0	0	0	0
310						DNAJB1		19		[62..226]	[DnaJ_C]	[C-terminal substrate binding domain of DnaJ and HSP40; cd10747]	[order(66,81..86,101,125)][order(162..163,166..167,188..191,222..226)]	[other][other]	[substrate binding site [polypeptide binding]][dimer interface [polypeptide binding]]				2	NP_001300893.1;NP_006136.1	588	NP_001300893.1	0 genes:. 2 proteins in this group did not match any genes. NP_001300893.1:dnaJ homolog subfamily B member 1 isoform 2 [Homo sapiens] ;NP_006136.1:dnaJ homolog subfamily B member 1 isoform 1 [Homo sapiens] ;	0	0	0	0	0	0	0	0	0	0	0	0	0	0	0	0	0	0	0	0.00025867	0	0	0	0	0	0
311	o	26	0.395	Q	26	SENP2		3	3.4.22.68	[28..31][46..51][317..332][<336..584][396..560]	[Nuclear localization signal][Nuclear localization signal][Nuclear export signal][Peptidase_C48][Protease]	[propagated from UniProtKB/Swiss-Prot (Q9HC62.3)][propagated from UniProtKB/Swiss-Prot (Q9HC62.3)][propagated from UniProtKB/Swiss-Prot (Q9HC62.3)][Ulp1 protease family, C-terminal catalytic domain; cl17784][propagated from UniProtKB/Swiss-Prot (Q9HC62.3)]							1	NP_067640.2	589	NP_067640.2	sentrin-specific protease 2 [Homo sapiens]	0	0	0	0	0	0	0	0	0	0	0	0	0	0	0	0	0	0	0	0	0	0.00019417	0.0001045	0	0	0
312	o	26	0.652	S	26	SLPI		20		[31..75][80..130]	[WAP][WAP]	[WAP-type (Whey Acidic Protein) 'four-disulfide core'; pfam00095][whey acidic protein-type four-disulfide core domains. Members of the family include whey acidic protein, elafin (elastase-specific inhibitor), caltrin-like protein (a calcium transport inhibitor) and other extracellular proteinase inhibitors. A group of...; cd00199]	[order(32..36,38..39)][45][67][67][67][93..99][98]	[inhibition][modified][modified][modified][modified][inhibition][modified]	[inhibitory loop][proteolytic cleavage site][proteolytic cleavage site][proteolytic cleavage site][proteolytic cleavage site][inhibitory loop][proteolytic cleavage site]				1	NP_003055.1	596	NP_003055.1	antileukoproteinase precursor [Homo sapiens]	0	0	0	0	0	0	0	0	0	0	0	0	0	0	0	0	0	0	0	0.00799524	0	0	0	0	0	0
313	o	40	0.022	Q	0	DCTPP1		16	3.6.1.12	[29..75][35..125][47..51]	[EAR][NTP-PPase_RS21-C6_like][Substrate binding. {ECO:0000250}]	[propagated from UniProtKB/Swiss-Prot (Q9H773.1)][Nucleoside Triphosphate Pyrophosphohydrolase (EC 3.6.1.8) MazG-like domain found in mouse RS21-C6 protein and its homologs; cd11537][propagated from UniProtKB/Swiss-Prot (Q9H773.1)]	[2][2][12][order(37..38,41,44..45,47,53..54,57..58,60..61,64,67..68,][order(38,63,66,95,98,102)][order(50,54..55,57..59,61..62,65..66,68,71..72,102)][order(63,66,95,98)][85]	[acetylation][phosphorylation][phosphorylation][other][other][other][metal-binding][phosphorylation]	[N-acetylserine. {ECO:0000244|PubMed:19413330, ECO:0000244|PubMed:22814378}; propagated from UniProtKB/Swiss-Prot (Q9H773.1)][Phosphoserine. {ECO:0000244|PubMed:18691976}; propagated from UniProtKB/Swiss-Prot (Q9H773.1)][Phosphothreonine. {ECO:0000244|PubMed:18691976}; propagated from UniProtKB/Swiss-Prot (Q9H773.1)][homodimer interface [polypeptide binding]][chemical substrate binding site [chem…				1	NP_077001.1	597	NP_077001.1	dCTP pyrophosphatase 1 [Homo sapiens]	0	0	0	0	0	0	0	0	0	0	0	0	0	0	0	0	0	0	0	0.00146072	0	0	0.00036206	0	0	0
314	o	3	0.036	Q	0	DNAJA1		9		[2..394][6..57][105..331][134..200][134..141][150..157][177..184][193..200]	[PTZ00037][DnaJ][DnaJ_C][DnaJ_zf][CXXCXGXG motif][CXXCXGXG motif][CXXCXGXG motif][CXXCXGXG motif]	[DnaJ_C chaperone protein; Provisional][DnaJ domain or J-domain. DnaJ/Hsp40 (heat shock protein 40) proteins are highly conserved and play crucial roles in protein translation, folding, unfolding, translocation, and degradation. They act primarily by stimulating the ATPase activity of Hsp70s; cd06257][C-terminal substrate binding domain of DnaJ and HSP40; cd10747][Zinc finger domain of DnaJ and H…	[order(34..36,42,45..46,49..50)][66][83][order(109,124..129,205,229)][order(134,137,150,153,177,180,193,196)][order(266..267,270..271,292,295..297,328..331)][335][335][340][381][381][381][394][394]	[other][acetylation][phosphorylation][other][other][other][phosphorylation][phosphorylation][phosphorylation][phosphorylation][phosphorylation][phosphorylation][methylation][modified]	[HSP70 interaction site [polypeptide binding]][N6-acetyllysine. {ECO:0000244|PubMed:19608861}; propagated from UniProtKB/Swiss-Prot (P31689.2)][Phosphoserine. {ECO:0000244|PubMed:17924679, ECO:0000244|PubMed:18691976, ECO:0000244|PubMed:19690332, ECO:0000244|PubMed:20068231}; propagated from UniProtKB/Swiss-Prot (P31689.2)][substrate binding site [polypeptide binding]][Zn binding sites [ion bindi…				1	NP_001530.1	600	NP_001530.1	dnaJ homolog subfamily A member 1 isoform 1 [Homo sapiens]	0	0	0	0	0	0.00055202	0	0.00121858	0	0.00277276	0	0.00158849	0	0	0	0.00422861	0	0	0	0	0	0	0	0	0	0
315						EIF2S2		20		[185..307]	[eIF-5_eIF-2B]	[Domain found in IF2B/IF5; pfam01873]	[2][2][13][67][102][108][155][215][262][290]	[acetylation][phosphorylation][phosphorylation][phosphorylation][phosphorylation][phosphorylation][phosphorylation][phosphorylation][acetylation][acetylation]	[N-acetylserine. {ECO:0000244|PubMed:19413330, ECO:0000244|PubMed:21406692, ECO:0000244|PubMed:22223895}; propagated from UniProtKB/Swiss-Prot (P20042.2)][Phosphoserine. {ECO:0000244|PubMed:17081983, ECO:0000244|PubMed:20068231, ECO:0000244|PubMed:21406692}; propagated from UniProtKB/Swiss-Prot (P20042.2)][Phosphoserine. {ECO:0000250|UniProtKB:P41035}; propagated from UniProtKB/Swiss-Prot (P20042…				3	NP_001303292.1;NP_001303293.1;NP_003899.2	601	NP_001303292.1	0 genes:. 3 proteins in this group did not match any genes. NP_001303292.1:eukaryotic translation initiation factor 2 subunit 2 isoform 2 [Homo sapiens] ;NP_001303293.1:eukaryotic translation initiation factor 2 subunit 2 isoform 3 [Homo sapiens] ;NP_003899.2:eukaryotic translation initiation factor 2 subunit 2 isoform 1 [Homo sapiens] ;	0	0	0	0	0	0	0	0	0	0	0	0.000637	0	0	0	0	0	0	0	0	0	0	0	0	0	0
316	o	18	0.428	Q	29	GSTP1		11	2.5.1.18	[3..76][8..196][52..53][65..66][84..210]	[GST_N_Pi][PTZ00057][Glutathione binding][Glutathione binding][GST_C_Pi]	[GST_N family, Class Pi subfamily; GSTs are cytosolic dimeric proteins involved in cellular detoxification by catalyzing the conjugation of glutathione (GSH) with a wide range of endogenous and xenobiotic alkylating agents, including carcinogens; cd03076][glutathione s-transferase; Provisional][propagated from UniProtKB/Swiss-Prot (P09211.2)][propagated from UniProtKB/Swiss-Prot (P09211.2)][C-ter…	[4][order(8,14,39,45,52..53,65..66)][order(11..13,16,24..25,67,70..71)][order(49..50,64..65,68,71,75)][order(84,88,91..92,95,99,129)][order(91,94..95,98,154,158,187,189..190,193,199,202..204)][order(98,101..102,105..106,109,159,162,205..206)][103][116][128][199]	[phosphorylation][other][other][other][other][other][other][modified][modified][acetylation][phosphorylation]	[Phosphotyrosine, by EGFR. {ECO:0000269|PubMed:19254954}; propagated from UniProtKB/Swiss-Prot (P09211.2)][GSH binding site (G-site) [chemical binding]][C-terminal domain interface [polypeptide binding]][dimer interface [polypeptide binding]][dimer interface [polypeptide binding]][N-terminal domain interface [polypeptide binding]][substrate binding pocket (H-site) [chemical binding]][N6-succinyll…				1	NP_000843.1	602	NP_000843.1	glutathione S-transferase P [Homo sapiens]	0	0	0	0	0	0	0	0	0	0	0	0	0	0	0	0	0	0	0	0.00118249	0	0	0	0	0	0
317	o	27	0.037	Q	0	LNP1		3		[11..175]	[LNP1]	[Leukemia NUP98 fusion partner 1; pfam15419]							1	NP_001078920.1	607	NP_001078920.1	leukemia NUP98 fusion partner 1 [Homo sapiens]	0	0	0	0	0	0	0	0	0	0	0	0	0	0	0	0.00235781	0	0	0	0	0	0	0	0	0	0
318	o	5	0.099	Q	19	COPB1		11		[26..550][96..131][132..168][240..276][277..314][316..353][396..433][666..809][812..945]	[Adaptin_N][HEAT 1][HEAT 2][HEAT 3][HEAT 4][HEAT 5][HEAT 6][Coatamer_beta_C][Coatomer_b_Cpla]	[Adaptin N terminal region; pfam01602][propagated from UniProtKB/Swiss-Prot (P53618.3)][propagated from UniProtKB/Swiss-Prot (P53618.3)][propagated from UniProtKB/Swiss-Prot (P53618.3)][propagated from UniProtKB/Swiss-Prot (P53618.3)][propagated from UniProtKB/Swiss-Prot (P53618.3)][propagated from UniProtKB/Swiss-Prot (P53618.3)][Coatomer beta C-terminal region; pfam07718][Coatomer beta subunit …	[2][494]	[acetylation][acetylation]	[N-acetylthreonine. {ECO:0000244|PubMed:19413330, ECO:0000244|PubMed:22223895}; propagated from UniProtKB/Swiss-Prot (P53618.3)][N6-acetyllysine. {ECO:0000250|UniProtKB:Q9JIF7}; propagated from UniProtKB/Swiss-Prot (P53618.3)]				1	NP_057535.1	609	NP_057535.1	coatomer subunit beta [Homo sapiens]	0	0	0	0	0	0	0	0.00016921	0	0.00023101	0	0	0	0	0	0	0	0	0	0	0	0	0	0	0	0
319						NUDT9		4	3.6.1.13	[117..303]	[ADPRase_NUDT9]	[ADP-ribose pyrophosphatase (ADPRase) catalyzes the hydrolysis of ADP-ribose to AMP and ribose-5-P. Like other members of the Nudix hydrolase superfamily of enzymes, it is thought to require a divalent cation, such as Mg2+, for its activity. It also...; cd03670]	[order(140,172,182,198,237,239,241,289,292)][183..205]	[active][other]	[][nudix motif]				3	NP_001234940.1;NP_076952.1;NP_932155.1	611	NP_001234940.1	0 genes:. 3 proteins in this group did not match any genes. NP_001234940.1:ADP-ribose pyrophosphatase, mitochondrial isoform c precursor [Homo sapiens] ;NP_076952.1:ADP-ribose pyrophosphatase, mitochondrial isoform a precursor [Homo sapiens] ;NP_932155.1:ADP-ribose pyrophosphatase, mitochondrial isoform b [Homo sapiens] ;	0	0	0	0	0	0	0	0	0	0	0	0	0	0	0	0	0	0	0	0	0	0	9.678e-05	0	0	0
320						MPP5		14		[89..137][155..203][220..299][315..377][444..625][447..622][<560..592]	[L27_N][L27][PDZ_signaling][SH3_MPP5][Guanylate_kin][GMPK][RNA_pol_Rpb4]	[L27_N; pfam09060][domain in receptor targeting proteins Lin-2 and Lin-7; smart00569][PDZ domain found in a variety of Eumetazoan signaling molecules, often in tandem arrangements. May be responsible for specific protein-protein interactions, as most PDZ domains bind C-terminal polypeptides, and binding to internal (non-C-terminal)...; cd00992][Src Homology 3 domain of Membrane Protein, Palmitoyl…	[order(232..235,237,283..284,287..288)][order(317,341..342)][order(320,322,325,336,354..355,374,376..377)][order(452,458,475,482,485,494,517,522)][order(452,458)]	[other][other][other][active][other]	[protein binding site [polypeptide binding]][GuK domain interface [polypeptide binding]][peptide ligand binding site [polypeptide binding]][catalytic site [active]][G-X2-G-X-G-K]				2	NP_001243479.1;NP_071919.2	612	NP_001243479.1	0 genes:. 2 proteins in this group did not match any genes. NP_001243479.1:MAGUK p55 subfamily member 5 isoform 2 [Homo sapiens] ;NP_071919.2:MAGUK p55 subfamily member 5 isoform 1 [Homo sapiens] ;	0	0.183592	0	0	0	0	0	0	0	0	0	0	0	0	0	0	0	0	0	0	0	0	0	0	0	0
321	o	3	0.12	Q	0	SQSTM1		5		[<1..18][42..84][309..348]	[PB1][ZZ_NBR1_like][UBA_SQSTM]	[The PB1 domain is a modular domain mediating specific protein-protein interactions which play a role in many critical cell processes, such as osteoclastogenesis, angiogenesis, early cardiovascular development, and cell polarity. A canonical PB1-PB1...; cl02720][Zinc finger, ZZ type. Zinc finger present in Drosophila ref(2)P, NBR1, Human sequestosome 1 and related proteins. The ZZ motif coordinat…	[order(44,47,58,61,67,70,76,79)][order(44,47,67,70)][order(45,55,57,63,65)][order(56,81,84)][order(58,61,76,79)][order(320..322,325..328,331..332,335,346..348)]	[other][other][other][other][other][other]	[Zinc-binding sites [ion binding]][zinc cluster 1 [ion binding]][putative charged binding surface][putative hydrophobic binding surface][zinc cluster 2 [ion binding]][polypeptide substrate binding site [polypeptide binding]]				2	NP_001135771.1;NP_003891.1	614	NP_001135771.1	0 genes:. 2 proteins in this group did not match any genes. NP_001135771.1:sequestosome-1 isoform 2 [Homo sapiens] ;NP_003891.1:sequestosome-1 isoform 1 [Homo sapiens] ;	0	0	0	0	0	0	0	0.00045298	0	0	0	0	0	0	0	0	0	0	0	0	0	0	0	0	0	0
322						NEDD8-MDP1		14		[1..>51][1..>50][48..176]	[UBQ][UBQ][Acid_PPase]	[Ubiquitin-like proteins; cl00155][Ubiquitin homologues; smart00213][Acid Phosphatase; pfam12689]	[order(27,42)][44..47][order(50..51,85..86)][50..54][85]	[other][other][active][other][other]	[charged pocket][hydrophobic patch][][motif I][motif II]				2	NP_001186752.1;NP_006147.1	616	NP_001186752.1	0 genes:. 2 proteins in this group did not match any genes. NP_001186752.1:NEDD8-MDP1 protein [Homo sapiens] ;NP_006147.1:NEDD8 precursor [Homo sapiens] ;	0	0	0	0	0	0	0	0	0	0	0	0.00108917	0	0	0	0	0	0	0	0	0	0	0	0	0	0
323						HDGF		1		[40..108]	[PWWP]	[The PWWP domain, named for a conserved Pro-Trp-Trp-Pro motif, is a small domain consisting of 100-150 amino acids. The PWWP domain is found in numerous proteins that are involved in cell division, growth and differentiation. Most PWWP-domain proteins...; cl02554]	[order(42,65,68,70)]	[other]	[putative chromatin binding site]				5	NP_001119522.1;NP_001119523.1;NP_001306115.1;NP_001306117.1;NP_004485.1	617	NP_001119522.1	0 genes:. 5 proteins in this group did not match any genes. NP_001119522.1:hepatoma-derived growth factor isoform b [Homo sapiens] ;NP_001119523.1:hepatoma-derived growth factor isoform c [Homo sapiens] ;NP_001306115.1:hepatoma-derived growth factor isoform d [Homo sapiens] ;NP_001306117.1:hepatoma-derived growth factor isoform e [Homo sapiens] ;NP_004485.1:hepatoma-derived growth factor isoform …	0	0	0	0	0	0	0	0	0	0	0	0	0	0	0	0	0	0	0.0876829	0.00315254	0	0.00067011	0.00012021	0	0	0
324	o	33	0.022	Q	0	TMPO		12		[8..44][49..108][111..>139][190..196][461..694]	[LEM_like][Linker][LEM_LAP2_LEMD1][Nuclear localization signal. {ECO:0000255}][LAP2alpha]	[LEM-like domain of lamina-associated polypeptide 2 (LAP2) and similar proteins; cd12935][propagated from UniProtKB/Swiss-Prot (P42166.2)][LEM (Lap2/Emerin/Man1) domain found in lamina-associated polypeptide 2 (LAP2), LEM domain-containing protein 1 (LEMP-1) and similar proteins; cd12940][propagated from UniProtKB/Swiss-Prot (P42166.2)][Lamina-associated polypeptide 2 alpha; pfam11560]	[57][59][66][66][66][67][67][74][74][79][79][order(117..118,130..135,137..138)][154][154][156][156][158][159][159][160][160][164][164][166][168][168][184][312][351][351][354][370][424][656]	[phosphorylation][phosphorylation][phosphorylation][phosphorylation][phosphorylation][phosphorylation][phosphorylation][phosphorylation][phosphorylation][phosphorylation][phosphorylation][other][phosphorylation][phosphorylation][phosphorylation][phosphorylation][phosphorylation][phosphorylation][phosphorylation][phosphorylation][phosphorylation][phosphorylation][phosphorylation][phosphorylation][…	[Phosphothreonine. {ECO:0000244|PubMed:18669648}; propagated from UniProtKB/Swiss-Prot (P42166.2)][Phosphoserine. {ECO:0000244|PubMed:21406692}; propagated from UniProtKB/Swiss-Prot (P42166.2)][][][Phosphoserine. {ECO:0000244|PubMed:18669648, ECO:0000244|PubMed:19690332, ECO:0000244|PubMed:24275569}; propagated from UniProtKB/Swiss-Prot (P42166.2)][][Phosphoserine. {ECO:0000244|PubMed:18669648, E…				1	NP_003267.1	619	NP_003267.1	thymopoietin isoform alpha [Homo sapiens]	0	0	0	0	0.00048308	0.00189467	0	0.0018589	0	0.00412398	0	0	0	0	0	0.00060474	0	0	0.00680929	0.00098399	0.00087071	0	0	0.00030081	0	0
325	o	17	0.11	Q	17	HSPA8		11		[1..613][6..381][186..377]	[PTZ00009][HSPA1-2_6-8-like_NBD][Interaction with BAG1]	[heat shock 70 kDa protein; Provisional][Nucleotide-binding domain of HSPA1-A, -B, -L, HSPA-2, -6, -7, -8, and similar proteins; cd10233][propagated from UniProtKB/Swiss-Prot (P11142.1)]	[2][order(10,12..15,71,147,175,199..204,206,230..231,268,][order(23,25,27,32..34,36,50,54,57,133..134,258,262,269,][order(33,35,57,60..61,257..258,261..262,265..266,269,][108][order(152,192,213,215..217,219..220,325)][153][153][246][319][319][328][362][477][512][512][524][561][589][597][601]	[acetylation][other][other][other][acetylation][other][phosphorylation][phosphorylation][acetylation][acetylation][modified][acetylation][phosphorylation][phosphorylation][acetylation][modified][acetylation][methylation][acetylation][acetylation][acetylation]	[N-acetylserine. {ECO:0000244|PubMed:19413330, ECO:0000269|Ref.5, ECO:0000269|Ref.6}; propagated from UniProtKB/Swiss-Prot (P11142.1)][nucleotide binding site [chemical binding]][NEF/HSP70 interaction site [polypeptide binding]][BAG/HSP70 interaction site [polypeptide binding]][N6-acetyllysine. {ECO:0000250|UniProtKB:P63017}; propagated from UniProtKB/Swiss-Prot (P11142.1)][SBD interface [polypep…				1	NP_006588.1	623	NP_006588.1	heat shock cognate 71 kDa protein isoform 1 [Homo sapiens]	0	0	0	0	0.0141852	0.00831789	0	0.00675669	0.0133536	0.0113146	0.0181715	0.0141689	0	0.0114388	0.0433026	0.0240565	0	0.0178248	0.0571103	0.0200426	0.0109227	0.00155606	0.00014292	0	0.00420236	0.00073092
326						ADAD1		4		[96..162][204..564]	[DSRM][ADEAMc]	[Double-stranded RNA binding motif. Binding is not sequence specific but is highly specific for double stranded RNA. Found in a variety of proteins including dsRNA dependent protein kinase PKR, RNA helicases, Drosophila staufen protein, E. coli RNase III; cd00048][tRNA-specific and double-stranded RNA adenosine deaminase (RNA-specific editase); smart00552]	[order(96,102..103,145..148,151)]	[other]	[dsRNA binding site [nucleotide binding]]				3	NP_001152757.1;NP_001152767.1;NP_640336.1	625	NP_001152757.1	0 genes:. 3 proteins in this group did not match any genes. NP_001152757.1:adenosine deaminase domain-containing protein 1 isoform 2 [Homo sapiens] ;NP_001152767.1:adenosine deaminase domain-containing protein 1 isoform 3 [Homo sapiens] ;NP_640336.1:adenosine deaminase domain-containing protein 1 isoform 1 [Homo sapiens] ;	0	0	0	0	0	0	0	0	0	0	0	0	0	0	0	0	0	0	0	0	0	0	5.447e-05	0	0	0
327	o	31	0.343	S	28	NUDT19		19		[116..137][373..375]	[Nudix box][Microbody targeting signal. {ECO:0000255}]	[propagated from UniProtKB/Swiss-Prot (A8MXV4.1)][propagated from UniProtKB/Swiss-Prot (A8MXV4.1)]							1	NP_001099040.1	628	NP_001099040.1	nucleoside diphosphate-linked moiety X motif 19 precursor [Homo sapiens]	0	0	0	0	0	0	0	0	0	0	0	0	0	0	0	0	0	0	0	0	0	0.00015249	0	0	0	0
328	o	17	0.215	Q	17	HSPA1B		6		[1..611][6..381]	[PTZ00009][HSPA1-2_6-8-like_NBD]	[heat shock 70 kDa protein; Provisional][Nucleotide-binding domain of HSPA1-A, -B, -L, HSPA-2, -6, -7, -8, and similar proteins; cd10233]	[2][order(10,12..15,71,147,175,199..204,206,230..231,268,][order(23,25,27,32..34,36,50,54,57,133..134,258,262,269,][order(33,35,57,60..61,257..258,261..262,265..266,269,][108][order(152,192,213,215..217,219..220,325)][246][348][561][631][633][636]	[acetylation][other][other][other][acetylation][other][acetylation][acetylation][methylation][phosphorylation][phosphorylation][phosphorylation]	[N-acetylalanine. {ECO:0000244|PubMed:19413330}; propagated from UniProtKB/Swiss-Prot (P0DMV9.1)][nucleotide binding site [chemical binding]][NEF/HSP70 interaction site [polypeptide binding]][BAG/HSP70 interaction site [polypeptide binding]][N6-acetyllysine. {ECO:0000244|PubMed:19608861}; propagated from UniProtKB/Swiss-Prot (P0DMV9.1)][SBD interface [polypeptide binding]][N6-acetyllysine. {ECO:0…				1	NP_005337.2	631	NP_005337.2	heat shock 70 kDa protein 1B [Homo sapiens]	0	0	0	0	0.00209208	0.00389101	0	0.00460885	0.00393013	0.00680049	0.00457832	0.00104941	0	0.00890802	0.00436404	0.00933475	0	0	0.0425848	0.00978438	0.00369831	0.00092965	0.00019204	0	0.00084703	0.00073662
329						CAPG		2		[17..120][137..>208][236..331]	[gelsolin_S1_like][gelsolin_S2_like][gelsolin_S3_like]	[Gelsolin sub-domain 1-like domain found in gelsolin, severin, villin, and related proteins; cd11290][Gelsolin sub-domain 2-like domain found in gelsolin, severin, villin, and related proteins; cd11289][Gelsolin sub-domain 3-like domain found in gelsolin, severin, villin, and related proteins; cd11292]	[order(29..30,65,71..72,74..76,78..80,82..83,94,96)][order(46,73)][85][order(164,186)][order(266,290)][order(326,331)]	[other][other][other][other][other][other]	[putative actin binding interface [polypeptide binding]][putative type 2 Ca binding site [ion binding]][putative type 1 Ca binding site [ion binding]][putative type 2 Ca binding site [ion binding]][putative type 2 Ca binding site [ion binding]][putative nucleotide binding site [chemical binding]]				3	NP_001243069.1;NP_001307663.1;NP_001738.2	634	NP_001243069.1	0 genes:. 3 proteins in this group did not match any genes. NP_001243069.1:macrophage-capping protein isoform 2 [Homo sapiens] ;NP_001307663.1:macrophage-capping protein isoform 3 [Homo sapiens] ;NP_001738.2:macrophage-capping protein isoform 1 [Homo sapiens] ;	0	0	0	0	0	0	0	0	0	0	0	0	0	0	0	0	0	0	0	0.00149143	0	0.00017172	0	0	0	0
331						PMFBP1		16		[91..>718]	[Smc]	[Chromosome segregation ATPase [Cell cycle control, cell division, chromosome partitioning]; COG1196]							2	NP_001153685.1;NP_112583.2	636	NP_001153685.1	0 genes:. 2 proteins in this group did not match any genes. NP_001153685.1:polyamine-modulated factor 1-binding protein 1 isoform b [Homo sapiens] ;NP_112583.2:polyamine-modulated factor 1-binding protein 1 isoform a [Homo sapiens] ;	0	0	0	0	0	0	0	0	0	0	0	0	0	0	0.00634319	0	0	0	0	0	0	0	0	0	0	0
332						COQ7		16		[11..178]	[DMQH]	[Demethoxyubiquinone hydroxylase, ferritin-like diiron-binding domain; cd01042]	[order(22,52,55,104,140,143)]	[other]	[diiron binding motif [ion binding]]				2	NP_001177912.1;NP_057222.2	637	NP_001177912.1	0 genes:. 2 proteins in this group did not match any genes. NP_001177912.1:5-demethoxyubiquinone hydroxylase, mitochondrial isoform 2 [Homo sapiens] ;NP_057222.2:5-demethoxyubiquinone hydroxylase, mitochondrial isoform 1 [Homo sapiens] ;	0	0	0	0	0	0	0	0.00090089	0	0	0	0	0	0	0	0	0	0	0	0	0	0	0	0	0	0
333	o	6	0.067	Q	0	BARD1		2		[26..119][50..89][424..544][427..459][432..524][460..492][493..525][526..546][554..558][568..641][674..767]	[Interaction with BRCA1][RING][ANK][ANK 1][Ank_2][ANK 2][ANK 3][ANK 4, degenerate][Flexible linker][BRCT][BRCT]	[propagated from UniProtKB/Swiss-Prot (Q99728.2)][RING-finger (Really Interesting New Gene) domain, a specialized type of Zn-finger of 40 to 60 residues that binds two atoms of zinc; defined by the 'cross-brace' motif C-X2-C-X(9-39)-C-X(1-3)- H-X(2-3)-(N/C/H)-X2-C-X(4-48)C-X2-C; probably involved in...; cd00162][ankyrin repeats; ankyrin repeats mediate protein-protein interactions in very diverse…	[order(50,53,66,68,71,74,83,86)][391][394][order(583,587,590,593,595)][order(635,639)][order(689,693,696,699,701)][order(762,766)]	[other][phosphorylation][phosphorylation][other][other][other][other]	[cross-brace motif][Phosphoserine. {ECO:0000269|PubMed:18669648}; propagated from UniProtKB/Swiss-Prot (Q99728.2)][Phosphothreonine. {ECO:0000269|PubMed:18669648}; propagated from UniProtKB/Swiss-Prot (Q99728.2)][Dimer interface [polypeptide binding]][BRCT sequence motif][Dimer interface [polypeptide binding]][BRCT sequence motif]				2	NP_000456.2;NP_001269472.1	639	NP_000456.2	0 genes:. 2 proteins in this group did not match any genes. NP_000456.2:BRCA1-associated RING domain protein 1 isoform 1 [Homo sapiens] ;NP_001269472.1:BRCA1-associated RING domain protein 1 isoform 2 [Homo sapiens] ;	0	0	0	0	0	0	0	0	0	0	0	0	0	0	0	0	0	0	0	0	0	0	7.921e-05	0	0	0
334						PPP1R12A		12		[5..58][13..165][112..165][139..>214][145..193][<842..917]	[Ank_5][ANK][Ank_4][ANK][Ank_4][DUF342]	[Ankyrin repeats (many copies); pfam13857][ankyrin repeats; ankyrin repeats mediate protein-protein interactions in very diverse families of proteins. The number of ANK repeats in a protein can range from 2 to over 20 (ankyrins, for example). ANK repeats may occur in combinations with other...; cd00204][Ankyrin repeats (many copies); pfam13637][ankyrin repeats; ankyrin repeats mediate protein-pro…							4	NP_001137358.1;NP_001231919.1;NP_001231921.1;NP_002471.1	640	NP_001137358.1	0 genes:. 4 proteins in this group did not match any genes. NP_001137358.1:protein phosphatase 1 regulatory subunit 12A isoform b [Homo sapiens] ;NP_001231919.1:protein phosphatase 1 regulatory subunit 12A isoform c [Homo sapiens] ;NP_001231921.1:protein phosphatase 1 regulatory subunit 12A isoform d [Homo sapiens] ;NP_002471.1:protein phosphatase 1 regulatory subunit 12A isoform a [Homo sapiens]…	0	0	0	0	0	0	0	0	0	0	0	0	0	0	0	0.00044506	0	0	0	0	0	0	0	0	0	0
335	o	42	0.026	Q	0	RAPSN		11		[1..80][6..39][<9..239][83..116][123..156][127..151][<138..>236][156..192][163..196][197..234][204..278][206..239][242..318][246..279][246..274][286..319][286..312][363..405]	[Rapsyn_N][TPR 1][TPR][TPR 2][TPR 3][TPR repeat][BRO1_Alix_like][TPR repeat][TPR 4][TPR repeat][TPR_12][TPR 5][TPR_12][TPR 6][TPR repeat][TPR 7][TPR repeat][RING]	[Rapsyn N-terminal myristoylation and linker region; pfam10579][propagated from UniProtKB/Swiss-Prot (Q13702.4)][Tetratricopeptide (TPR) repeat [General function prediction only]; COG0457][propagated from UniProtKB/Swiss-Prot (Q13702.4)][propagated from UniProtKB/Swiss-Prot (Q13702.4)][TPR repeat [structural motif]][Protein-interacting Bro1-like domain of mammalian Alix and related domains; cl146…	[2][order(127..128,131..132,134,158,167..168,171..172,][196][order(363,366,382,384,387,390,399,402)][405]	[myristoylation][other][phosphorylation][other][phosphorylation]	[][putative protein binding surface [polypeptide binding]][Phosphotyrosine. {ECO:0000255}; propagated from UniProtKB/Swiss-Prot (Q13702.4)][cross-brace motif][Phosphoserine. {ECO:0000255}; propagated from UniProtKB/Swiss-Prot (Q13702.4)]				2	NP_005046.2;NP_116034.2	641	NP_005046.2	0 genes:. 2 proteins in this group did not match any genes. NP_005046.2:43 kDa receptor-associated protein of the synapse isoform 1 [Homo sapiens] ;NP_116034.2:43 kDa receptor-associated protein of the synapse isoform 2 [Homo sapiens] ;	0	0	0	0	0	0.00053192	0	0.00078281	0	0	0	0	0	0	0	0	0	0	0	0	0	0	0	0	0	0
336	o	16	0.05	Q	0	PRDM10		11		[220..325][532..552][<559..692][562..581][590..610][618..638][646..665][674..695][729..755][774..791]	[SET][C2H2 Zn finger][COG5048][C2H2 Zn finger][C2H2 Zn finger][C2H2 Zn finger][C2H2 Zn finger][C2H2 Zn finger][C2H2 Zn finger][C2H2 Zn finger]	[SET domain; pfam00856][C2H2 Zn finger [structural motif]][FOG: Zn-finger [General function prediction only]][C2H2 Zn finger [structural motif]][C2H2 Zn finger [structural motif]][C2H2 Zn finger [structural motif]][C2H2 Zn finger [structural motif]][C2H2 Zn finger [structural motif]][C2H2 Zn finger [structural motif]][C2H2 Zn finger [structural motif]]	[424][424][428][428][order(532,535,548,552)][order(537,539,541,543..544,547..548,551,567,569,573..574,][order(562,565,578,582)][order(590,593,606,610)][order(618,621,634,638)][order(623,625,627,629..630,633..634,637,651,653,657..658,][order(646,649,662,666)][order(674,677,690,695)][1101]	[phosphorylation][phosphorylation][phosphorylation][phosphorylation][other][other][other][other][other][other][other][other][phosphorylation]	[][Phosphoserine. {ECO:0000244|PubMed:20068231, ECO:0000244|PubMed:21406692}; propagated from UniProtKB/Swiss-Prot (Q9NQV6.3)][][Phosphothreonine. {ECO:0000244|PubMed:17525332, ECO:0000244|PubMed:21406692}; propagated from UniProtKB/Swiss-Prot (Q9NQV6.3)][Zn binding site [ion binding]][putative nucleic acid binding site [nucleotide binding]][Zn binding site [ion binding]][Zn binding site [ion bin…				4	NP_064613.2;NP_955469.1;NP_955470.1;NP_955471.1	644	NP_064613.2	0 genes:. 4 proteins in this group did not match any genes. NP_064613.2:PR domain zinc finger protein 10 isoform 1 [Homo sapiens] ;NP_955469.1:PR domain zinc finger protein 10 isoform 2 [Homo sapiens] ;NP_955470.1:PR domain zinc finger protein 10 isoform 3 [Homo sapiens] ;NP_955471.1:PR domain zinc finger protein 10 isoform 4 [Homo sapiens] ;	0	0	0	0	0	0	0	0.00013902	0	0	0	0	0	0	0	0	0	0	0	0	0	0	0	0	0	0
337	o	3	0.166	Q	0	SPEN		1		[7..81][8..75][336..409][337..408][436..509][439..508][510..586][518..584][2130..2464][2709..2870][3417..3664][3509..3630]	[RRM1_SHARP][RRM][RRM2_SHARP][RRM][RRM3_SHARP][RRM][RRM4_SHARP][RRM][Interaction with MSX2. {ECO:0000250}][Interaction with RBPSUH. {ECO:0000250}][SID/RD][SPOC]	[RNA recognition motif 1 in SMART/HDAC1-associated repressor protein (SHARP) and similar proteins; cd12348][RNA recognition motif; smart00360][RNA recognition motif 2 in SMART/HDAC1-associated repressor protein (SHARP) and similar proteins; cd12349][RNA recognition motif; smart00360][RNA recognition motif 3 in SMART/HDAC1-associated repressor protein (SHARP) and similar proteins; cd12350][RNA rec…	[260][263][266][309][623][631][725][727][727][736][740][740][742][751][830][833][847][1062][1194][1219][1222][1252][1261][1268][1268][1278][1278][1283][1283][1287][1333][1380][1380][1382][1382][1439][1441][1622][1633][1797][1857][1897][1947][2101][2101][2120][2126][2159][2366][2393][2393][2412][2421][2452][2456][2460][2481][2486][2938][2950][3433]	[phosphorylation][phosphorylation][phosphorylation][phosphorylation][phosphorylation][phosphorylation][phosphorylation][phosphorylation][phosphorylation][phosphorylation][phosphorylation][phosphorylation][phosphorylation][phosphorylation][phosphorylation][phosphorylation][phosphorylation][phosphorylation][phosphorylation][phosphorylation][phosphorylation][phosphorylation][phosphorylation][phospho…	[][][][Phosphoserine. {ECO:0000244|PubMed:20068231}; propagated from UniProtKB/Swiss-Prot (Q96T58.1)][Phosphoserine. {ECO:0000244|PubMed:20068231}; propagated from UniProtKB/Swiss-Prot (Q96T58.1)][][][][Phosphoserine. {ECO:0000244|PubMed:20068231, ECO:0000244|PubMed:21406692}; propagated from UniProtKB/Swiss-Prot (Q96T58.1)][Phosphoserine. {ECO:0000244|PubMed:18669648}; propagated from UniProtKB/…				1	NP_055816.2	645	NP_055816.2	msx2-interacting protein [Homo sapiens]	0	0	0	0	0	0	0	0	0	0	0	0	0	0	0	0	0	0	0	0	6.597e-05	1.561e-05	1.68e-05	0	0	0
338	o	39	0.011	Q	0	MAX		14		[23..79][81..102][152..156]	[HLH][Leucine-zipper][Nuclear localization signal]	[Helix-loop-helix domain, found in specific DNA- binding proteins that act as transcription factors; 60-100 amino acids long. A DNA-binding basic region is followed by two alpha-helices separated by a variable loop region; HLH forms homo- and heterodimers; cd00083][propagated from UniProtKB/Swiss-Prot (P61244.1)][propagated from UniProtKB/Swiss-Prot (P61244.1)]	[2][2][2][10][11][11][order(24..25,31..33,35,57,60)][32][order(38..39,42..43,45..46,61,64,68,70..71,75,77..78)][49][66][123][132][135][138][140][141][142][144][144][153][154]	[phosphorylation][acetylation][phosphorylation][modified][phosphorylation][phosphorylation][DNA binding][other][other][phosphorylation][acetylation][phosphorylation][phosphorylation][modified][phosphorylation][phosphorylation][phosphorylation][phosphorylation][phosphorylation][phosphorylation][acetylation][acetylation]	[][N-acetylserine. {ECO:0000244|PubMed:19413330, ECO:0000244|PubMed:20068231, ECO:0000244|PubMed:21406692}; propagated from UniProtKB/Swiss-Prot (P61244.1)][Phosphoserine. {ECO:0000244|PubMed:17081983, ECO:0000244|PubMed:20068231, ECO:0000244|PubMed:21406692}; propagated from UniProtKB/Swiss-Prot (P61244.1)][proteolytic cleavage site][][Phosphoserine. {ECO:0000244|PubMed:17081983, ECO:0000244|Pub…				2	NP_002373.3;NP_660087.1	646	NP_002373.3	0 genes:. 2 proteins in this group did not match any genes. NP_002373.3:protein max isoform a [Homo sapiens] ;NP_660087.1:protein max isoform b [Homo sapiens] ;	0	0	0	0	0	0	0	0.00302361	0	0.00137598	0	0	0	0	0	0	0	0	0	0.00155202	0.0105748	0.00071478	0.00076937	0	0	0
339	o	18	0.09	Q	18	FKBP3		14	5.2.1.8	[121..221]	[FKBP_C]	[FKBP-type peptidyl-prolyl cis-trans isomerase; pfam00254]	[2][36][36][99][152][170]	[acetylation][phosphorylation][phosphorylation][acetylation][phosphorylation][acetylation]	[N-acetylalanine. {ECO:0000244|PubMed:19413330, ECO:0000244|PubMed:22814378, ECO:0000244|PubMed:25944712}; propagated from UniProtKB/Swiss-Prot (Q00688.1)][][Phosphoserine. {ECO:0000244|PubMed:20068231}; propagated from UniProtKB/Swiss-Prot (Q00688.1)][N6-acetyllysine. {ECO:0000250|UniProtKB:Q62446}; propagated from UniProtKB/Swiss-Prot (Q00688.1)][Phosphoserine. {ECO:0000244|PubMed:18669648}; pr…				1	NP_002004.1	647	NP_002004.1	peptidyl-prolyl cis-trans isomerase FKBP3 [Homo sapiens]	0	0	0	0	0	0	0	0	0	0	0	0	0	0	0	0	0	0	0	0	0.00215813	0.00204224	0.00041216	0	0	0
340						UQCRH		1	1.10.2.2	[21..85]	[UCR_hinge]	[Ubiquinol-cytochrome C reductase hinge protein; pfam02320]							3	NP_001284494.1;NP_001284495.1;NP_005995.2	651	NP_001284494.1	0 genes:. 3 proteins in this group did not match any genes. NP_001284494.1:cytochrome b-c1 complex subunit 6, mitochondrial isoform 2 precursor [Homo sapiens] ;NP_001284495.1:cytochrome b-c1 complex subunit 6, mitochondrial isoform 3 precursor [Homo sapiens] ;NP_005995.2:cytochrome b-c1 complex subunit 6, mitochondrial isoform 1 precursor [Homo sapiens] ;	0	0	0	0	0	0	0	0	0	0	0	0	0	0	0	0	0	0	0	0	0	0	0.00036206	0	0	0
341	o	17	0.058	Q	17	EIF1B		3		[29..112]	[eIF1_SUI1]	[Eukaryotic initiation factor 1; cd11566]	[2][9][order(38,41..42,44,61,64..66,68..70,72,86,89)][88..89]	[acetylation][phosphorylation][other][other]	[N-acetylserine. {ECO:0000244|PubMed:21406692}; propagated from UniProtKB/Swiss-Prot (O60739.2)][Phosphoserine. {ECO:0000244|PubMed:21406692}; propagated from UniProtKB/Swiss-Prot (O60739.2)][rRNA binding site [nucleotide binding]][Mutations affecting start-site selection]				1	NP_005866.1	652	NP_005866.1	eukaryotic translation initiation factor 1b [Homo sapiens]	0	0	0	0	0	0	0	0	0	0	0	0	0	0	0	0	0	0	0	0	0	0.00025302	0.00171187	0	0	0
342	o	22	0.207	Q	20	SGTB		5		[15..49][84..149][85..118][85..118][85..113][117..184][118..148][119..152][119..152][153..186][153..186][153..181]	[TPR 1][TPR_11][TPR 2][TPR_1][TPR repeat][TPR_11][TPR repeat][TPR 3][TPR_1][TPR 4][TPR_1][TPR repeat]	[propagated from UniProtKB/Swiss-Prot (Q96EQ0.1)][TPR repeat; pfam13414][propagated from UniProtKB/Swiss-Prot (Q96EQ0.1)][Tetratricopeptide repeat; pfam00515][TPR repeat [structural motif]][TPR repeat; pfam13414][TPR repeat [structural motif]][propagated from UniProtKB/Swiss-Prot (Q96EQ0.1)][Tetratricopeptide repeat; pfam00515][propagated from UniProtKB/Swiss-Prot (Q96EQ0.1)][Tetratricopeptide re…	[order(86,89..90,93..94,96,120,123..124,127..128,130..131,][295][297]	[other][phosphorylation][phosphorylation]	[putative protein binding surface [polypeptide binding]][Phosphoserine. {ECO:0000244|PubMed:18669648}; propagated from UniProtKB/Swiss-Prot (Q96EQ0.1)][Phosphoserine. {ECO:0000244|PubMed:18669648, ECO:0000244|PubMed:21406692}; propagated from UniProtKB/Swiss-Prot (Q96EQ0.1)]				1	NP_061945.1	653	NP_061945.1	small glutamine-rich tetratricopeptide repeat-containing protein beta [Homo sapiens]	0	0	0	0	0	0	0	0	0	0	0	0	0	0	0	0	0	0	0	0	0	0.0001881	0.00010123	0	0	0
343	o	25	0.345	S	29	DUT		15	3.6.1.23	[134..221][173..175][187..190][246..247]	[trimeric_dUTPase][Substrate binding][Substrate binding][Substrate binding]	[Trimeric dUTP diphosphatases; cd07557][propagated from UniProtKB/Swiss-Prot (P33316.4)][propagated from UniProtKB/Swiss-Prot (P33316.4)][propagated from UniProtKB/Swiss-Prot (P33316.4)]	[88][order(134..135,145,150..151,153,169,171..176,182..184,188,][order(173..175,188..190,193,197..198)]	[phosphorylation][other][active]	[Phosphoserine. {ECO:0000269|PubMed:20068231, ECO:0000269|PubMed:24275569}; propagated from UniProtKB/Swiss-Prot (P33316.4)][trimer interface [polypeptide binding]][]				2	NP_001020419.1;NP_001939.1	654	NP_001020419.1	0 genes:. 2 proteins in this group did not match any genes. NP_001020419.1:deoxyuridine 5'-triphosphate nucleotidohydrolase, mitochondrial isoform 1 precursor [Homo sapiens] ;NP_001939.1:deoxyuridine 5'-triphosphate nucleotidohydrolase, mitochondrial isoform 2 [Homo sapiens] ;	0	0	0	0	0	0	0	0	0	0	0	0	0	0	0	0	0	0	0	0	0	0.00090766	0.00036637	0	0	0
344	o	40	0.016	Q	0	TAF15		17		[229..314][232..312][351..381][355..376][404..572]	[RRM_FUS_TAF15][RRM][zf-RanBP][RanBP2-type Zn finger][21 X approximate tandem repeats of D-R-[S,G](0,3)-G-G-Y-G-G]	[RNA recognition motif in vertebrate fused in Ewing's sarcoma protein (FUS), TATA-binding protein-associated factor 15 (TAF15) and similar proteins; cd12535][RNA recognition motif; smart00360][Zn-finger in Ran binding protein and others; pfam00641][RanBP2-type Zn finger [structural motif]][propagated from UniProtKB/Swiss-Prot (Q92804.1)]	[94][203][203][223][228][265][order(357,362,373,376)][372][412][420][435][439][448][456][464][472][480][480][487][495][502][509][516][525][532][532][551][559][567][567]	[phosphorylation][methylation][methylation][phosphorylation][phosphorylation][acetylation][other][phosphorylation][methylation][phosphorylation][phosphorylation][phosphorylation][phosphorylation][methylation][methylation][methylation][methylation][methylation][methylation][methylation][methylation][methylation][methylation][methylation][methylation][methylation][phosphorylation][methylation][meth…	[][][Asymmetric dimethylarginine, by PRMT1. {ECO:0000269|PubMed:19124016, ECO:0000269|Ref.9}; propagated from UniProtKB/Swiss-Prot (Q92804.1)][Phosphoserine. {ECO:0000244|PubMed:19690332}; propagated from UniProtKB/Swiss-Prot (Q92804.1)][Phosphoserine. {ECO:0000244|PubMed:19690332}; propagated from UniProtKB/Swiss-Prot (Q92804.1)][N6-acetyllysine. {ECO:0000244|PubMed:19608861}; propagated from Un…				2	NP_003478.1;NP_631961.1	655	NP_003478.1	0 genes:. 2 proteins in this group did not match any genes. NP_003478.1:TATA-binding protein-associated factor 2N isoform 2 [Homo sapiens] ;NP_631961.1:TATA-binding protein-associated factor 2N isoform 1 [Homo sapiens] ;	0	0	0	0	0	0	0	0	0	0	0	0	0	0	0	0	0	0	0	0	0	0.00029125	0	0	0	0
346	o	21	0.05	Q	0	ZNF516		18		[1..431][32..>90][34..56][36..55][48..73][64..84][176..194][202..223][250..269][278..298][1100..1119]	[Mediates promoter DNA-binding and activation of transcription. {ECO:0000250|UniProtKB:Q7TSH3}][COG5048][zf-C2H2][C2H2 Zn finger][zf-H2C2_2][C2H2 Zn finger][C2H2 Zn finger][C2H2 Zn finger][C2H2 Zn finger][C2H2 Zn finger][C2H2 Zn finger]	[propagated from UniProtKB/Swiss-Prot (Q92618.1)][FOG: Zn-finger [General function prediction only]][Zinc finger, C2H2 type; pfam00096][C2H2 Zn finger [structural motif]][Zinc-finger double domain; pfam13465][C2H2 Zn finger [structural motif]][C2H2 Zn finger [structural motif]][C2H2 Zn finger [structural motif]][C2H2 Zn finger [structural motif]][C2H2 Zn finger [structural motif]][C2H2 Zn finger …	[order(36,39,52,56)][order(64,67,80,84)][order(176,179,192,194)][order(202,205,218,223)][order(207,209,211,213..214,217..218,222,255,257,261..262,][order(250,253,266,270)][order(278,281,294,298)][order(1100,1103,1116,1120)]	[other][other][other][other][other][other][other][other]	[Zn binding site [ion binding]][Zn binding site [ion binding]][Zn binding site [ion binding]][Zn binding site [ion binding]][putative nucleic acid binding site [nucleotide binding]][Zn binding site [ion binding]][Zn binding site [ion binding]][Zn binding site [ion binding]]				1	NP_055458.1	660	NP_055458.1	zinc finger protein 516 [Homo sapiens]	0	0	0	0	0	0	0	0	0	0	0	0	0	0	0	0	0	0	0	0	0	4.917e-05	2.646e-05	0	0	0
347	o	32	0.074	Q	0	EIF5B		2	3.6.5.3	[627..1202][632..845][638..645][663..667][702..705][756..759][824..826][856..965][964..1067][1091..1162]	[PRK04004][IF2_eIF5B][G1. {ECO:0000255|PROSITE-ProRule:PRU01059}][G2. {ECO:0000255|PROSITE-ProRule:PRU01059}][G3. {ECO:0000255|PROSITE-ProRule:PRU01059}][G4. {ECO:0000255|PROSITE-ProRule:PRU01059}][G5. {ECO:0000255|PROSITE-ProRule:PRU01059}][aeIF5B_II][IF-2][Translation_Factor_II_like]	[translation initiation factor IF-2; Validated][Initiation Factor 2 (IF2)/ eukaryotic Initiation Factor 5B (eIF5B) family; cd01887][propagated from UniProtKB/Swiss-Prot (O60841.4)][propagated from UniProtKB/Swiss-Prot (O60841.4)][propagated from UniProtKB/Swiss-Prot (O60841.4)][propagated from UniProtKB/Swiss-Prot (O60841.4)][propagated from UniProtKB/Swiss-Prot (O60841.4)][aeIF5B_II: This family…	[107][107][113][113][113][134][134][135][135][137][137][164][164][164][171][171][182][182][183][183][186][186][190][190][190][214][214][222][301][498][547][557][560][588][589][591][591][595][638..645][order(639,641,645..646,649,652..653,669..670,706..707,][order(640..646,707,756..757,759..760,824..826)][663..669][665][702..705][704..722][756..759][824..826][1168]	[phosphorylation][phosphorylation][phosphorylation][phosphorylation][phosphorylation][phosphorylation][phosphorylation][phosphorylation][phosphorylation][phosphorylation][phosphorylation][phosphorylation][phosphorylation][phosphorylation][phosphorylation][phosphorylation][phosphorylation][phosphorylation][phosphorylation][phosphorylation][phosphorylation][phosphorylation][phosphorylation][phospho…	[][Phosphoserine. {ECO:0000244|PubMed:17081983, ECO:0000244|PubMed:18318008, ECO:0000244|PubMed:18669648, ECO:0000244|PubMed:21406692, ECO:0000244|PubMed:24275569}; propagated from UniProtKB/Swiss-Prot (O60841.4)][][][Phosphoserine. {ECO:0000244|PubMed:17081983, ECO:0000244|PubMed:18318008, ECO:0000244|PubMed:18669648, ECO:0000244|PubMed:19690332, ECO:0000244|PubMed:20068231, ECO:0000244|PubMed:2…				1	NP_056988.3	661	NP_056988.3	eukaryotic translation initiation factor 5B [Homo sapiens]	0	0	0	0	0	0.00089816	0	0.00052872	0	0	0	0	0	0	0	0	0	0	0	0	0	0	0	0	0	0
348	o	17	0.516	Q	17	ABHD11		7		[53..257][67..>163]	[PRK10673][Esterase_lipase]	[acyl-CoA esterase; Provisional][Esterases and lipases (includes fungal lipases, cholinesterases, etc.) These enzymes act on carboxylic esters (EC: 3.1.1.-). The catalytic apparatus involves three residues (catalytic triad): a serine, a glutamate or aspartate and a histidine.These...; cl21494]							5	NP_001138836.1;NP_001287987.1;NP_001308312.1;NP_683710.1;NP_683711.1	662	NP_001138836.1	0 genes:. 5 proteins in this group did not match any genes. NP_001138836.1:protein ABHD11 isoform 8 [Homo sapiens] ;NP_001287987.1:protein ABHD11 isoform 9 [Homo sapiens] ;NP_001308312.1:protein ABHD11 isoform 10 [Homo sapiens] ;NP_683710.1:protein ABHD11 isoform 1 [Homo sapiens] ;NP_683711.1:protein ABHD11 isoform 2 [Homo sapiens] ;	0	0	0	0	0	0	0	0	0	0	0	0	0	0	0	0	0	0	0	0	0	0	0.00011928	0	0	0
349	i12-31o	33	0.886	S	33	CDSN		6											1	NP_001255.3	670	NP_001255.3	corneodesmosin precursor [Homo sapiens]	0	0	0	0	0	0	0	0	0	0.00041618	0	0	0	0	0	0	0	0	0	0	0	0	0	0	0	0
350	i109-131o	7	0.048	Q	24	CKAP4		12		[194..>296]	[Ran-binding]	[RanGTP-binding protein; pfam05508]	[3][17][19][19][107..127][312]	[phosphorylation][phosphorylation][phosphorylation][phosphorylation][transmembrane region][phosphorylation]	[Phosphoserine; propagated from UniProtKB/Swiss-Prot (Q07065.2)][Phosphoserine; propagated from UniProtKB/Swiss-Prot (Q07065.2)][][Phosphoserine; propagated from UniProtKB/Swiss-Prot (Q07065.2)][propagated from UniProtKB/Swiss-Prot (Q07065.2)][Phosphoserine; propagated from UniProtKB/Swiss-Prot (Q07065.2)]				1	NP_006816.2	673	NP_006816.2	cytoskeleton-associated protein 4 [Homo sapiens]	0	0	0	0	0.00111381	0.00218422	0	0.00026787	0	0	0	0	0	0	0	0	0	0	0	0	0	0	0	0	0	0
351	o	46	0.048	Q	46	KPNB1		17		[2..871][2..31][21..101][33..65][85..123][129..160][170..202][212..247][253..302][314..360][329..342][334..419][365..479][402..438][449..485][500..537][544..592][600..639][644..681][686..724][732..776][786..829][831..873]	[KAP95][HEAT 1. {ECO:0000269|PubMed:10353244, ECO:0000269|PubMed:10367892}][IBN_N][HEAT 2. {ECO:0000269|PubMed:10353244, ECO:0000269|PubMed:10367892}][HEAT 3. {ECO:0000269|PubMed:10353244, ECO:0000269|PubMed:10367892}][HEAT 4. {ECO:0000269|PubMed:10353244, ECO:0000269|PubMed:10367892}][HEAT 5. {ECO:0000269|PubMed:10353244, ECO:0000269|PubMed:10367892}][HEAT 6. {ECO:0000269|PubMed:10353244, ECO:00…	[Karyopherin (importin) beta [Intracellular trafficking and secretion]; COG5215][propagated from UniProtKB/Swiss-Prot (Q14974.2)][Importin-beta N-terminal domain; pfam03810][propagated from UniProtKB/Swiss-Prot (Q14974.2)][propagated from UniProtKB/Swiss-Prot (Q14974.2)][propagated from UniProtKB/Swiss-Prot (Q14974.2)][propagated from UniProtKB/Swiss-Prot (Q14974.2)][propagated from UniProtKB/Swi…	[1][12][211][order(384,388,392,423,427,430,434,469,472,475..476,479)][835][867]	[acetylation][phosphorylation][acetylation][other][acetylation][acetylation]	[N-acetylmethionine. {ECO:0000244|PubMed:19413330, ECO:0000244|PubMed:22223895, ECO:0000244|PubMed:22814378, ECO:0000244|PubMed:25944712, ECO:0000269|Ref.9}; propagated from UniProtKB/Swiss-Prot (Q14974.2)][Phosphoserine. {ECO:0000244|PubMed:18669648}; propagated from UniProtKB/Swiss-Prot (Q14974.2)][N6-acetyllysine, alternate. {ECO:0000244|PubMed:19608861}; propagated from UniProtKB/Swiss-Prot (…				1	NP_002256.2	674	NP_002256.2	importin subunit beta-1 isoform 1 [Homo sapiens]	0	0	0	0	0	0.00025017	0	0.00092043	0	0.00025132	0	0.00023997	0	0	0	0	0	0	0	0.00042521	0	0	0	0	0	0
352						SLBP		4		[89..161]	[SLBP_RNA_bind]	[Histone RNA hairpin-binding protein RNA-binding domain; pfam15247]							2	NP_001293004.1;NP_006518.1	675	NP_001293004.1	0 genes:. 2 proteins in this group did not match any genes. NP_001293004.1:histone RNA hairpin-binding protein isoform 3 [Homo sapiens] ;NP_006518.1:histone RNA hairpin-binding protein isoform 1 [Homo sapiens] ;	0	0	0	0	0	0	0	0	0	0	0	0	0	0	0	0	0	0	0	0.0005375	0	0	0	0	0	0
353	o	16	0.66	S	16	MCCC2		5	6.4.1.4	[36..563][<84..255][343..372][<344..>482]	[PLN02820][crotonase-like][Acyl-CoA binding. {ECO:0000255}][crotonase-like]	[3-methylcrotonyl-CoA carboxylase, beta chain][Crotonase/Enoyl-Coenzyme A (CoA) hydratase superfamily. This superfamily contains a diverse set of enzymes including enoyl-CoA hydratase, napthoate synthase, methylmalonyl-CoA decarboxylase, 3-hydoxybutyryl-CoA dehydratase, and dienoyl-CoA isomerase; cl21466][propagated from UniProtKB/Swiss-Prot (Q9HCC0.1)][Crotonase/Enoyl-Coenzyme A (CoA) hydratase …	[70][70][141][495][495][511]	[acetylation][modified][modified][acetylation][modified][acetylation]	[N6-acetyllysine, alternate. {ECO:0000250|UniProtKB:Q3ULD5}; propagated from UniProtKB/Swiss-Prot (Q9HCC0.1)][N6-succinyllysine, alternate. {ECO:0000250|UniProtKB:Q3ULD5}; propagated from UniProtKB/Swiss-Prot (Q9HCC0.1)][N6-succinyllysine. {ECO:0000250|UniProtKB:Q3ULD5}; propagated from UniProtKB/Swiss-Prot (Q9HCC0.1)][N6-acetyllysine, alternate. {ECO:0000250|UniProtKB:Q3ULD5}; propagated from Un…				1	NP_071415.1	677	NP_071415.1	methylcrotonoyl-CoA carboxylase beta chain, mitochondrial [Homo sapiens]	0	0	0	0	0	0	0	0	0	0.00039104	0	0	0	0	0	0	0	0	0	0.00011027	0.00042933	0.00050784	0.00010932	0	0	0
354	o	19	0.894	S	19	LYZ		12	3.2.1.17	[19..143]	[LYZ1]	[C-type lysozyme (1, 4-beta-N-acetylmuramidase, LYZ) and alpha-lactalbumin (lactose synthase B protein, LA). They have a close evolutionary relationship and similar tertiary structure, however, functionally they are quite different. Lysozymes have...; cd00119]	[order(52..53,55,62,76,78,81,117,120,126..127)][order(53,71)][order(104,109..110)]	[active][active][other]	[lysozyme catalytic cleft [active]][lysozyme catalytic site [active]][Ca2+ binding site [ion binding]]				1	NP_000230.1	678	NP_000230.1	lysozyme C precursor [Homo sapiens]	0.0139798	0	0	0	0	0.00296149	0	0	0	0	0	0	0	0	0	0	0	0	0	0.0620807	0	0	0	0	0.00366854	0
355	o	25	0.276	S	25	SUCLG1		2	6.2.1.4;6.2.1.5	[19..344][53..146][199..324]	[PTZ00187][CoA_binding][Ligase_CoA]	[succinyl-CoA synthetase alpha subunit; Provisional][CoA binding domain; pfam02629][CoA-ligase; cl22543]	[54][57][57][66][66][81][105][338]	[acetylation][acetylation][modified][acetylation][modified][acetylation][acetylation][modified]	[N6-acetyllysine. {ECO:0000244|PubMed:19608861}; propagated from UniProtKB/Swiss-Prot (P53597.4)][N6-acetyllysine, alternate. {ECO:0000250|UniProtKB:Q9WUM5}; propagated from UniProtKB/Swiss-Prot (P53597.4)][N6-succinyllysine, alternate. {ECO:0000250|UniProtKB:Q9WUM5}; propagated from UniProtKB/Swiss-Prot (P53597.4)][N6-acetyllysine, alternate. {ECO:0000250|UniProtKB:Q9WUM5}; propagated from UniPr…				1	NP_003840.2	679	NP_003840.2	succinyl-CoA ligase [ADP/GDP-forming] subunit alpha, mitochondrial precursor [Homo sapiens]	0	0	0	0	0	0	0	0	0	0	0	0	0	0	0	0	0	0	0	0.00035885	0.00069858	0	0	0	0	0
356	i	30	0.025	Q	25	RPS14		5		[1..140]	[PTZ00129]	[40S ribosomal protein S14; Provisional]	[133]	[phosphorylation]	[Phosphothreonine; propagated from UniProtKB/Swiss-Prot (P62263.3)]				1	NP_005608.1	680	NP_005608.1	40S ribosomal protein S14 [Homo sapiens]	0	0	0	0	0	0	0	0	0	0	0	0.00278423	0	0	0	0	0	0	0	0	0	0	0	0	0	0
357	o	39	0.021	Q	0	CYB5A		18		[12..85]	[Cyt-b5]	[Cytochrome b5-like Heme/Steroid binding domain; pfam00173]	[2][10][19]	[acetylation][acetylation][acetylation]	[N-acetylalanine. {ECO:0000269|PubMed:2752049}; propagated from UniProtKB/Swiss-Prot (P00167.2)][N6-acetyllysine. {ECO:0000250|UniProtKB:P56395}; propagated from UniProtKB/Swiss-Prot (P00167.2)][N6-acetyllysine. {ECO:0000250|UniProtKB:P56395}; propagated from UniProtKB/Swiss-Prot (P00167.2)]				2	NP_001905.1;NP_683725.1	683	NP_001905.1	0 genes:. 2 proteins in this group did not match any genes. NP_001905.1:cytochrome b5 isoform 2 [Homo sapiens] ;NP_683725.1:cytochrome b5 isoform 1 [Homo sapiens] ;	0	0	0	0	0	0.00223623	0	0.00329101	0	0	0	0	0	0	0	0	0	0	0	0	0	0	0.00094208	0	0	0
358						RAP1B		12		[3..125][5..125]	[P-loop_NTPase][Ras]	[P-loop containing Nucleoside Triphosphate Hydrolases; cl21455][Ras family; pfam00071]	[10..17][order(12..18,74..75,77,105..107)][34..35][74..77][105..107]	[other][other][other][other][other]	[G1 box][GTP/Mg2+ binding site [chemical binding]][Switch II region][G4 box][G5 box]				5	NP_001238847.1;NP_001238850.1;NP_001238851.1;NP_002875.1;NP_056461.1	684	NP_001238847.1	0 genes:. 5 proteins in this group did not match any genes. NP_001238847.1:ras-related protein Rap-1b isoform 2 [Homo sapiens] ;NP_001238850.1:ras-related protein Rap-1b isoform 3 [Homo sapiens] ;NP_001238851.1:ras-related protein Rap-1b isoform 4 [Homo sapiens] ;NP_002875.1:ras-related protein Rap-1A precursor [Homo sapiens] ;NP_056461.1:ras-related protein Rap-1b isoform 1 precursor [Homo sapie…	0	0	0	0	0	0.00154331	0	0	0	0	0	0	0	0	0	0	0	0	0	0	0	0	0.00130034	0	0	0
359	o	17	0.045	Q	0	PGK1		X	2.7.2.3	[9..416][24..26][63..66]	[Phosphoglycerate_kinase][Substrate binding][Substrate binding]	[Phosphoglycerate kinase (PGK) is a monomeric enzyme which catalyzes the transfer of the high-energy phosphate group of 1,3-bisphosphoglycerate to ADP, forming ATP and 3-phosphoglycerate. This reaction represents the first of the two substrate-level...; cd00318][propagated from UniProtKB/Swiss-Prot (P00558.3)][propagated from UniProtKB/Swiss-Prot (P00558.3)]	[2][11][order(24,26,39,63,123)][48][75][86][97][131][131][146][196][196][199][order(201..204,392..394)][203][203][order(239,313,337,339,341..344,374..376)][267][291][375]	[acetylation][acetylation][other][acetylation][acetylation][acetylation][acetylation][acetylation][modified][acetylation][phosphorylation][phosphorylation][acetylation][other][phosphorylation][phosphorylation][other][acetylation][acetylation][active]	[N-acetylserine; propagated from UniProtKB/Swiss-Prot (P00558.3)][N6-acetyllysine; propagated from UniProtKB/Swiss-Prot (P00558.3)][substrate binding site [chemical binding]][N6-acetyllysine, alternate; propagated from UniProtKB/Swiss-Prot (P00558.3)][N6-acetyllysine; propagated from UniProtKB/Swiss-Prot (P00558.3)][N6-acetyllysine; propagated from UniProtKB/Swiss-Prot (P00558.3)][N6-acetyllysine…				1	NP_000282.1	690	NP_000282.1	phosphoglycerate kinase 1 [Homo sapiens]	0.00045106	0	0	0	0	0	0	0	0	0	0	0	0	0	0	0	0	0	0	0.00089325	0	0.00013713	0	0	0	0
360	o	30	0.02	Q	21	MYBBP1A		17		[1..582][70..836][240..258][263..281][1142..1284]	[Interaction with MYB. {ECO:0000250|UniProtKB:Q7TPV4}][DNA_pol_phi][Nuclear export signal 1. {ECO:0000250|UniProtKB:Q7TPV4}][Nuclear export signal 2. {ECO:0000250|UniProtKB:Q7TPV4}][Rib_recp_KP_reg]	[propagated from UniProtKB/Swiss-Prot (Q9BQG0.2)][DNA polymerase phi; pfam04931][propagated from UniProtKB/Swiss-Prot (Q9BQG0.2)][propagated from UniProtKB/Swiss-Prot (Q9BQG0.2)][Ribosome receptor lysine/proline rich region; pfam05104]	[11][71][158][775][1159][1163][1186][1190][1196][1207][1232][1241][1244][1248][1267][1269][1290][1303][1307][1308][1310][1314]	[phosphorylation][acetylation][acetylation][phosphorylation][phosphorylation][phosphorylation][phosphorylation][phosphorylation][phosphorylation][phosphorylation][phosphorylation][phosphorylation][phosphorylation][phosphorylation][phosphorylation][phosphorylation][phosphorylation][phosphorylation][modified][phosphorylation][phosphorylation][phosphorylation]	[Phosphoserine. {ECO:0000244|PubMed:16964243, ECO:0000244|PubMed:17081983, ECO:0000244|PubMed:18669648, ECO:0000244|PubMed:18691976, ECO:0000244|PubMed:20068231}; propagated from UniProtKB/Swiss-Prot (Q9BQG0.2)][N6-acetyllysine. {ECO:0000244|PubMed:19608861}; propagated from UniProtKB/Swiss-Prot (Q9BQG0.2)][N6-acetyllysine. {ECO:0000244|PubMed:19608861}; propagated from UniProtKB/Swiss-Prot (Q9BQ…				2	NP_001099008.1;NP_055335.2	691	NP_001099008.1	0 genes:. 2 proteins in this group did not match any genes. NP_001099008.1:myb-binding protein 1A isoform 1 [Homo sapiens] ;NP_055335.2:myb-binding protein 1A isoform 2 [Homo sapiens] ;	0	0	0	0	0	0	0	0	0	0	0	0	0	0	0	0	0	0	0	0	0	0	2.31e-05	0	0	0
361	o	40	0.627	S	40	IGFBP2		2		[43..135][229..309]	[IB][TY]	[Insulin growth factor-binding protein homologues; smart00121][Thyroglobulin type I repeats.; The N-terminal region of human thyroglobulin contains 11 type-1 repeats TY repeats are proposed to be inhibitors of cysteine proteases; cd00191]	[order(234,259,277,285)]	[other]	[protease interaction site]				3	NP_000588.2;NP_001300919.1;NP_001300922.1	693	NP_000588.2	0 genes:. 3 proteins in this group did not match any genes. NP_000588.2:insulin-like growth factor-binding protein 2 isoform a precursor [Homo sapiens] ;NP_001300919.1:insulin-like growth factor-binding protein 2 isoform b [Homo sapiens] ;NP_001300922.1:insulin-like growth factor-binding protein 2 isoform c [Homo sapiens] ;	0	0	0	0	0	0	0	0	0	0	0	0	0	0	0	0	0	0	0	0	0	0	0.00028148	0	0	0
362						UBE2A		X	2.3.2.23	[<1..118][1..108]	[COG5078][UBCc]	[Ubiquitin-protein ligase [Posttranslational modification, protein turnover, chaperones]][Ubiquitin-conjugating enzyme E2, catalytic (UBCc) domain. This is part of the ubiquitin-mediated protein degradation pathway in which a thiol-ester linkage forms between a conserved cysteine and the C-terminus of ubiquitin and complexes with ubiquitin...; cd00195]	[order(31..32,65..66)][order(42..43,47..48,50,54..56,58..59,63..64,67,72,75,78,][55]	[other][other][active]	[E3 interaction residues][Ub thioester intermediate interaction residues][active site cysteine]				3	NP_001269090.1;NP_003327.2;NP_861427.1	694	NP_001269090.1	0 genes:. 3 proteins in this group did not match any genes. NP_001269090.1:ubiquitin-conjugating enzyme E2 A isoform 4 [Homo sapiens] ;NP_003327.2:ubiquitin-conjugating enzyme E2 A isoform 1 [Homo sapiens] ;NP_861427.1:ubiquitin-conjugating enzyme E2 A isoform 2 [Homo sapiens] ;	0	0	0	0	0	0	0	0	0	0	0	0	0	0	0	0	0	0	0	0	0	0	0.00103444	0	0	0
364						MDH1		2	1.1.1.37;1.1.1.96	[20..345][21..346]	[MalateDH-SF1][MDH_cytoplasmic_cytosolic]	[malate dehydrogenase; TIGR01759][Cytoplasmic and cytosolic Malate dehydrogenases; cd01336]	[order(29,31..34,60,105..108,126,147,149,173,205,259)][order(36,73..74,76..78,179..180,183,248,251,255..256,][order(110,116,149,176,180,205,253,260)]	[other][other][other]	[NAD binding site [chemical binding]][dimer interface [polypeptide binding]][malate binding site [chemical binding]]				4	NP_001186040.1;NP_001186041.1;NP_001303303.1;NP_005908.1	696	NP_001186040.1	0 genes:. 4 proteins in this group did not match any genes. NP_001186040.1:malate dehydrogenase, cytoplasmic isoform 2 [Homo sapiens] ;NP_001186041.1:malate dehydrogenase, cytoplasmic isoform 3 [Homo sapiens] ;NP_001303303.1:malate dehydrogenase, peroxisomal isoform MDH1x [Homo sapiens] ;NP_005908.1:malate dehydrogenase, cytoplasmic isoform MDH1 [Homo sapiens] ;	0	0	0	0	0	0	0	0	0	0	0	0	0	0	0	0	0	0	0	0.0005291	0	0	0	0	0	0
365	o	25	0.226	Q	25	HCFC1		X		[12..330][32..69][33..80][44..89][84..134][91..145][93..140][133..179][137..196][148..194][200..253][215..263][217..265][255..319][264..330][266..313][318..359][322..367][500..550][610..722][683..>823][750..902][813..912][1010..1035][1072..1097][1101..1126][1158..1183][1286..1311][1314..1339][1349..1374][1414..1439][<1856..1885][1891..1996]	[PLN02153][Kelch_1][KELCH repeat][Kelch 1][KELCH repeat][Kelch_3][Kelch 2][Kelch_5][KELCH repeat][Kelch 3][KELCH repeat][Kelch_3][Kelch 4][KELCH repeat][Kelch_3][Kelch 5][Kelch_5][KELCH repeat][Required for interaction with OGT][Interaction with SIN3A][PHA03255][Interaction with ZBTB17][Interaction with GABP2][HCF repeat 1][HCF repeat 2][HCF repeat 3][HCF repeat 4, degenerate][HCF repeat 5][HCF r…	[epithiospecifier protein][Kelch motif; pfam01344][KELCH repeat [structural motif]][propagated from UniProtKB/Swiss-Prot (P51610.2)][KELCH repeat [structural motif]][Galactose oxidase, central domain; pfam13415][propagated from UniProtKB/Swiss-Prot (P51610.2)][Kelch motif; pfam13854][KELCH repeat [structural motif]][propagated from UniProtKB/Swiss-Prot (P51610.2)][KELCH repeat [structural motif]]…	[2][6][288][411][666][666][669][813][1019..1020][1081..1082][1110..1111][1205][1295..1296][1323..1324][1423..1424][1491][1507][order(1874..1875,1877..1878)][order(1891,1969,1990)][order(1991..1992,1994..1995)][2005][2020]	[acetylation][phosphorylation][acetylation][phosphorylation][phosphorylation][phosphorylation][phosphorylation][acetylation][cleavage][cleavage][cleavage][phosphorylation][cleavage][cleavage][cleavage][phosphorylation][phosphorylation][other][other][other][acetylation][phosphorylation]	[N-acetylalanine. {ECO:0000269|PubMed:19413330, ECO:0000269|PubMed:20068231, ECO:0000269|PubMed:21406692, ECO:0000269|PubMed:22223895, ECO:0000269|PubMed:22814378}; propagated from UniProtKB/Swiss-Prot (P51610.2)][Phosphoserine. {ECO:0000269|PubMed:20068231, ECO:0000269|PubMed:21406692}; propagated from UniProtKB/Swiss-Prot (P51610.2)][N6-acetyllysine. {ECO:0000269|PubMed:19608861}; propagated fr…				1	NP_005325.2	697	NP_005325.2	host cell factor 1 [Homo sapiens]	0	0	0	0	0	0	0	0	0	0.00108185	0.00288423	0.0001033	0	0.00061306	0	0	0	0	0	0	0	0	0	0	0	0
366	o	25	0.079	Q	25	RBMS1		2		[55..140][63..123][141..226][142..207]	[RRM1_MSSP1][RRM][RRM2_MSSP2][RRM]	[RNA recognition motif 1 in vertebrate single-stranded DNA-binding protein MSSP-1; cd12470][RNA recognition motif; smart00360][RNA recognition motif 2 found in vertebrate single-stranded DNA-binding protein MSSP-2; cd12474][RNA recognition motif; smart00360]	[112][208]	[phosphorylation][phosphorylation]	[][Phosphothreonine. {ECO:0000244|PubMed:18669648}; propagated from UniProtKB/Swiss-Prot (P29558.3)]				2	NP_002888.1;NP_058520.1	701	NP_002888.1	0 genes:. 2 proteins in this group did not match any genes. NP_002888.1:RNA-binding motif, single-stranded-interacting protein 1 isoform c [Homo sapiens] ;NP_058520.1:RNA-binding motif, single-stranded-interacting protein 1 isoform a [Homo sapiens] ;	0	0	0	0	0	0	0	0	0	0	0	0	0	0	0	0	0	0	0	0.00015405	0	0.00014189	0.00022909	0	0	0
367						CPD		17	3.4.17.22	[<3..132][136..212][249..544][548..623][685..963][967..1041]	[Peptidase_M14_like][Peptidase_M14NE-CP-C_like][M14_CPD_II][Peptidase_M14NE-CP-C_like][M14_CPD_III][Peptidase_M14NE-CP-C_like]	[M14 family of metallocarboxypeptidases and related proteins; cl11393][Peptidase associated domain: C-terminal domain of M14 N/E carboxypeptidase; putative folding, regulation, or interaction domain; cd11308][Peptidase M14 carboxypeptidase subfamily N/E-like; Carboxypeptidase D, domain II subgroup; cd03863][Peptidase associated domain: C-terminal domain of M14 N/E carboxypeptidase; putative foldi…	[order(317,320,378,387..388,424..425,431,435,489,493,495,][order(317,320,424)][order(747,750,808,817..818,849..850,856,860,908,912,914,][order(747,750,849)]	[active][other][active][other]	[][Zn binding site [ion binding]][putative active site [active]][Zn binding site [ion binding]]				2	NP_001186704.1;NP_001295.2	703	NP_001186704.1	0 genes:. 2 proteins in this group did not match any genes. NP_001186704.1:carboxypeptidase D isoform 2 [Homo sapiens] ;NP_001295.2:carboxypeptidase D isoform 1 precursor [Homo sapiens] ;	0	0	0	0	0	0.00019342	0	0	0	0	0	0	0	0	0	0	0	0	0	0	0	0	0	0	0	0
368	o	3	0.094	Q	17	EZR		6		[7..206][9..86][98..198][200..296][244..586][303..>432][338..586]	[B41][FERM_N][FERM_B-lobe][FERM_C_ERM][Interaction with SCYL3][Tape_meas_lam_C][ERM]	[Band 4.1 homologues; smart00295][FERM N-terminal domain; pfam09379][FERM domain B-lobe; cd14473][FERM domain C-lobe/F3 of the ERM family; cd13194][propagated from UniProtKB/Swiss-Prot (P15311.4)][Lambda phage tail tape-measure protein (Tape_meas_lam_C); cl19901][Ezrin/radixin/moesin family; pfam00769]	[60][146][146][146][146][235][order(242..243,245..251,260,281,284..285,288)][order(242,245..252,260,281,284..285,288)][order(278,282)][281..296][354][354][478][535][567][567]	[acetylation][phosphorylation][phosphorylation][modified][phosphorylation][phosphorylation][other][other][other][other][phosphorylation][phosphorylation][phosphorylation][phosphorylation][phosphorylation][phosphorylation]	[N6-acetyllysine; propagated from UniProtKB/Swiss-Prot (P15311.4)][][][dephosphorylation site][Phosphotyrosine, by PDGFR; propagated from UniProtKB/Swiss-Prot (P15311.4)][][homodimer interface [polypeptide binding]][peptide binding site [polypeptide binding]][phosphoinositide binding site [chemical binding]][actin binding site 2 [polypeptide binding]][][Phosphotyrosine, by PDGFR; propagated from …				1	NP_003370.2	706	NP_003370.2	ezrin [Homo sapiens]	0.00032098	0	0	0	0	0	0	0	0	0	0	0	0	0	0	0	0	0	0	0.00024215	0	0	0	0	0	0
369	o	19	0.799	S	19	SDF2		17		[22..72][83..138][140..189]	[MIR][MIR][MIR]	[Domain in ryanodine and inositol trisphosphate receptors and protein O-mannosyltransferases; smart00472][Domain in ryanodine and inositol trisphosphate receptors and protein O-mannosyltransferases; smart00472][Domain in ryanodine and inositol trisphosphate receptors and protein O-mannosyltransferases; smart00472]							1	NP_008854.2	707	NP_008854.2	stromal cell-derived factor 2 precursor [Homo sapiens]	0	0	0	0	0	0	0	0	0	0	0	0	0	0	0	0.0039781	0	0	0.0111982	0.00117689	0	0.00054202	0.00087511	0.00593643	0	0
370	o386-408i	20	0.726	S	20	FCRL4		1		[23..100][105..171][110..179][193..281][291..377][295..377][449..454][461..466][491..496]	[Ig1_FcgammaR_like][Ig][IG_like][Ig_2][Ig_2][IG_like][ITIM motif 1][ITIM motif 2][ITIM motif 3]	[Frst immunoglobulin (Ig)-like domain of Fcgamma-receptors (FcgammaRs) and similar proteins; cd05752][Immunoglobulin domain; cl11960][Immunoglobulin like; smart00410][Immunoglobulin domain; pfam13895][Immunoglobulin domain; pfam13895][Immunoglobulin like; smart00410][propagated from UniProtKB/Swiss-Prot (Q96PJ5.1)][propagated from UniProtKB/Swiss-Prot (Q96PJ5.1)][propagated from UniProtKB/Swiss-P…	[17..18][order(26..27,45,53..56)][388..408]	[other][other][transmembrane region]	[Breakpoint for insertion to form FCRL4-IGHA1 fusion protein; propagated from UniProtKB/Swiss-Prot (Q96PJ5.1)][pentraxin binding site][propagated from UniProtKB/Swiss-Prot (Q96PJ5.1)]				1	NP_112572.1	708	NP_112572.1	Fc receptor-like protein 4 precursor [Homo sapiens]	0	0	0	0	0	0	0	0	0	0	0	0	0	0	0	0	0	0	0	0	0	0	5.976e-05	0	0	0
371	o	25	0.3	S	25	BPHL		6		[46..268]	[Abhydrolase_6]	[Alpha/beta hydrolase family; pfam12697]							2	NP_001289706.1;NP_004323.2	709	NP_001289706.1	0 genes:. 2 proteins in this group did not match any genes. NP_001289706.1:valacyclovir hydrolase isoform 2 [Homo sapiens] ;NP_004323.2:valacyclovir hydrolase isoform 1 precursor [Homo sapiens] ;	0	0	0	0	0	0	0	0	0	0	0	0	0	0	0	0	0	0	0	0	0	0	0.00056158	0	0	0
372	o	46	0.036	Q	0	EIF5		14		[2..130][233..385]	[eIF-5_eIF-2B][W2_eIF5]	[Domain found in IF2B/IF5; pfam01873][C-terminal W2 domain of eukaryotic translation initiation factor 5; cd11561]	[10][174][229][389][389][389][390][390][390][419]	[phosphorylation][phosphorylation][phosphorylation][phosphorylation][phosphorylation][phosphorylation][phosphorylation][phosphorylation][phosphorylation][phosphorylation]	[Phosphoserine; propagated from UniProtKB/Swiss-Prot (P55010.2)][][Phosphoserine; propagated from UniProtKB/Swiss-Prot (P55010.2)][][][Phosphoserine; propagated from UniProtKB/Swiss-Prot (P55010.2)][][][Phosphoserine; propagated from UniProtKB/Swiss-Prot (P55010.2)][Phosphoserine; propagated from UniProtKB/Swiss-Prot (P55010.2)]				1	NP_892116.2	710	NP_892116.2	eukaryotic translation initiation factor 5 [Homo sapiens]	0	0	0	0	0	0	0	0	0	0	0	0	0	0	0	0	0	0	0	0	0	0.00026535	7.14e-05	0	0	0
373						MBD4		3		[87..156][455..568]	[MeCP2_MBD][ENDO3c]	[MeCP2, MBD1, MBD2, MBD3, and MBD4 are members of a protein family that share the methyl-CpG-binding domain (MBD). The MBD, consists of about 70 residues and is defined as the minimal region required for binding to methylated DNA by a methyl-CpG-binding...; cd01396][endonuclease III; includes endonuclease III (DNA-(apurinic or apyrimidinic site) lyase), alkylbase DNA glycosidases (Alka-family) an…	[order(93,95,97,105,107,116,119,123)][order(462..464,467,506)][528..534]	[DNA binding][other][other]	[DNA binding site [nucleotide binding]][minor groove reading motif][helix-hairpin-helix signature motif]				4	NP_001263199.1;NP_001263200.1;NP_001263201.1;NP_003916.1	711	NP_001263199.1	0 genes:. 4 proteins in this group did not match any genes. NP_001263199.1:methyl-CpG-binding domain protein 4 isoform 2 [Homo sapiens] ;NP_001263200.1:methyl-CpG-binding domain protein 4 isoform 3 [Homo sapiens] ;NP_001263201.1:methyl-CpG-binding domain protein 4 isoform 4 [Homo sapiens] ;NP_003916.1:methyl-CpG-binding domain protein 4 isoform 1 [Homo sapiens] ;	0	0	0	0	0	0	0	0	0	0	0	0	0	0	0	0	0	0	0	0	0	9.962e-05	5.361e-05	0	0	0
374	o	26	0.095	Q	26	UBE2S		19	2.3.2.23	[9..153][13..152]	[COG5078][UBCc]	[Ubiquitin-protein ligase [Posttranslational modification, protein turnover, chaperones]][Ubiquitin-conjugating enzyme E2, catalytic (UBCc) domain. This is part of the ubiquitin-mediated protein degradation pathway in which a thiol-ester linkage forms between a conserved cysteine and the C-terminus of ubiquitin and complexes with ubiquitin...; cd00195]	[1][order(14,71..72,105..106)][order(82..83,87..88,90,94..96,98..99,103..104,107,112,115,][95]	[acetylation][other][other][active]	[N-acetylmethionine. {ECO:0000244|PubMed:19413330}; propagated from UniProtKB/Swiss-Prot (Q16763.2)][E3 interaction residues][Ub thioester intermediate interaction residues][active site cysteine]				1	NP_055316.2	713	NP_055316.2	ubiquitin-conjugating enzyme E2 S [Homo sapiens]	0	0	0	0	0	0	0	0	0	0	0	0	0	0	0	0	0	0	0	0	0	0.00025758	0.00013862	0	0	0
375	o	21	0.26	Q	21	HSPA4		5		[2..384][3..607]	[HSPA4_NBD][HSP70]	[Nucleotide-binding domain of HSPA4; cd11737][Hsp70 protein; pfam00012]	[order(9..12,68,202,204..207,233,271,274..275,278,342..344,][order(18,21..24,29..33,54..55,57..58,138..139,184,265,275,][order(44..46,78,112,116,119..120,123,127,150..151,][53][76][89][336][336][415][430][538][546][552][660][679]	[other][other][other][acetylation][phosphorylation][phosphorylation][phosphorylation][phosphorylation][phosphorylation][acetylation][phosphorylation][phosphorylation][phosphorylation][phosphorylation][acetylation]	[nucleotide binding site [chemical binding]][HSP70 interaction site [polypeptide binding]][SBD interface [polypeptide binding]][N6-acetyllysine. {ECO:0000250|UniProtKB:Q61316}; propagated from UniProtKB/Swiss-Prot (P34932.4)][Phosphoserine. {ECO:0000244|PubMed:19690332, ECO:0000244|PubMed:21406692}; propagated from UniProtKB/Swiss-Prot (P34932.4)][Phosphotyrosine. {ECO:0000244|PubMed:15592455}; p…				1	NP_002145.3	715	NP_002145.3	heat shock 70 kDa protein 4 [Homo sapiens]	0	0	0	0	0	0	0	0	0	0	0	0	0	0	0	0.00049963	0	0	0	0	0	0	0	0	0	0
376	o5-22i	23	0.875	S	23	MDK		11		[37..116]	[PTN]	[Pleiotrophin / midkine family; smart00193]							1	NP_002382.1	716	NP_002382.1	midkine isoform a precursor [Homo sapiens]	0	0	0	0	0	0	0	0	0	0	0	0	0	0	0	0	0	0	0	0	0	0	0.00064562	0	0	0
377						TXNRD2		22	1.8.1.9	[124..>190][<176..250][220..295]	[FMT_C_like][NADB_Rossmann][Pyr_redox]	[Carboxy-terminal domain of Formyltransferase and similar domains; cl14785][Rossmann-fold NAD(P)(+)-binding proteins; cl21454][Pyridine nucleotide-disulphide oxidoreductase; pfam00070]							2	NP_001269441.1;NP_006431.2	717	NP_001269441.1	0 genes:. 2 proteins in this group did not match any genes. NP_001269441.1:thioredoxin reductase 2, mitochondrial isoform 2 precursor [Homo sapiens] ;NP_006431.2:thioredoxin reductase 2, mitochondrial isoform 1 precursor [Homo sapiens] ;	0	0	0	0	0	0	0	0	0	0	0	0	0	0	0	0	0	0	0	0.00036734	0	0	0	0	0	0
378	o	15	0.137	Q	26	CSRP2		12		[9..63][64..69][119..172]	[LIM1_CRP2][Nuclear localization signal. {ECO:0000255}][LIM2_CRP2]	[The first LIM domain of Cysteine Rich Protein 2 (CRP2); cd09480][propagated from UniProtKB/Swiss-Prot (Q16527.3)][The second LIM domain of Cysteine Rich Protein 2 (CRP2); cd09840]	[order(10,13,31,34,37,40,58,61)][112][order(119,122,140,143,146,149,167,170)][137]	[other][acetylation][other][modified]	[Zn binding site [ion binding]][N6-acetyllysine. {ECO:0000250|UniProtKB:P97314}; propagated from UniProtKB/Swiss-Prot (Q16527.3)][Zn binding site [ion binding]][N6-succinyllysine. {ECO:0000250|UniProtKB:P97314}; propagated from UniProtKB/Swiss-Prot (Q16527.3)]				1	NP_001312.1	719	NP_001312.1	cysteine and glycine-rich protein 2 [Homo sapiens]	0	0	0	0	0	0	0	0	0	0	0	0	0	0	0	0	0	0	0	0	0	0.00088885	0.00079727	0	0	0
379	o	16	0.078	Q	23	SFPQ		1		[9..27][296..366][298..364][372..451][375..>429][442..538]	[3 X 3 AA repeats of R-G-G][RRM1_PSF][RRM][RRM2_p54nrb_like][RRM][NOPS_PSF]	[propagated from UniProtKB/Swiss-Prot (P23246.2)][RNA recognition motif 1 in vertebrate polypyrimidine tract-binding protein (PTB)-associated-splicing factor (PSF); cd12587][RNA recognition motif; smart00360][RNA recognition motif 2 in the p54nrb/PSF/PSP1 family; cd12333][RNA recognition motif; smart00360][NOPS domain, including C-terminal coiled-coil region, in polypyrimidine tract-binding prote…	[7][8][9][19][25][33][33][208][273][283][293][314][319][338][order(377,380..386,390,394,399,401..406,411,415,430..431,][379][421][order(442..444,446,452..461,464,470,472..476,478..481,][472][571][626][662..663][681][687][693]	[methylation][phosphorylation][methylation][methylation][methylation][phosphorylation][phosphorylation][acetylation][phosphorylation][phosphorylation][phosphorylation][methylation][acetylation][acetylation][other][phosphorylation][acetylation][other][acetylation][methylation][phosphorylation][other][methylation][phosphorylation][methylation]	[][Phosphoserine, by MKNK2. {ECO:0000269|PubMed:17965020}; propagated from UniProtKB/Swiss-Prot (P23246.2)][][][][][Phosphoserine. {ECO:0000244|PubMed:20068231, ECO:0000244|PubMed:21406692}; propagated from UniProtKB/Swiss-Prot (P23246.2)][N6-acetyllysine. {ECO:0000250|UniProtKB:Q8VIJ6}; propagated from UniProtKB/Swiss-Prot (P23246.2)][Phosphoserine. {ECO:0000244|PubMed:18669648, ECO:0000244|PubM…				1	NP_005057.1	721	NP_005057.1	splicing factor, proline- and glutamine-rich [Homo sapiens]	0	0	0	0	0	0	0	0	0	0	0	0	0	0.0070584	0	0.00565685	0	0.00542897	0	0	0	8.088e-05	0.00026117	0.00059056	0	0
380	o	23	0.097	Q	23	RRP8		11		[312..388]	[AdoMet_MTases]	[S-adenosylmethionine-dependent methyltransferases (SAM or AdoMet-MTase), class I; AdoMet-MTases are enzymes that use S-adenosyl-L-methionine (SAM or AdoMet) as a substrate for methyltransfer, creating the product S-adenosyl-L-homocysteine (AdoHcy); cd02440]	[51][53][58][62][62][64][64][104][106][171][171][176][184][223][223][223][order(315..319,334..335,345..347,363)]	[phosphorylation][phosphorylation][phosphorylation][phosphorylation][phosphorylation][phosphorylation][phosphorylation][phosphorylation][phosphorylation][phosphorylation][phosphorylation][phosphorylation][phosphorylation][phosphorylation][phosphorylation][phosphorylation][other]	[][][][][Phosphoserine. {ECO:0000244|PubMed:18669648, ECO:0000244|PubMed:19690332}; propagated from UniProtKB/Swiss-Prot (O43159.2)][][Phosphoserine. {ECO:0000244|PubMed:18669648, ECO:0000244|PubMed:19690332}; propagated from UniProtKB/Swiss-Prot (O43159.2)][][][][Phosphoserine. {ECO:0000244|PubMed:18669648, ECO:0000244|PubMed:24275569}; propagated from UniProtKB/Swiss-Prot (O43159.2)][][][][][Ph…				1	NP_056139.1	726	NP_056139.1	ribosomal RNA-processing protein 8 [Homo sapiens]	0	0	0	0	0	0	0	0	0	0	0	0	0	0	0	0	0	0	0	0.00040843	0	0.0002508	6.749e-05	0	0	0
381						ING2		4		[<18..85][173..221]	[ING][PHD_ING2]	[Inhibitor of growth proteins N-terminal histone-binding; pfam12998][PHD finger found in inhibitor of growth protein 2 (ING2); cd15683]	[order(174,181..189,196..197,200,208..209,211)][order(175,177,188,193,199,202,215,218)]	[other][other]	[H3K4me3 binding site [polypeptide binding]][Zn binding site [ion binding]]				2	NP_001278888.1;NP_001555.1	728	NP_001278888.1	0 genes:. 2 proteins in this group did not match any genes. NP_001278888.1:inhibitor of growth protein 2 isoform 2 [Homo sapiens] ;NP_001555.1:inhibitor of growth protein 2 isoform 1 [Homo sapiens] ;	0	0	0	0	0	0	0	0	0	0.00091732	0	0	0	0	0	0	0	0	0	0	0	0	0	0	0	0
382	o	17	0.097	Q	30	VIM		10		[2..95][14..101][96..407][96..131][102..410][132..153][154..245][246..268][269..407][290..>368][408..466]	[Head][Filament_head][Rod][Coil 1A][Filament][Linker 1][Coil 1B][Linker 12][Coil 2][phage_LysB][Tail]	[propagated from UniProtKB/Swiss-Prot (P08670.4)][Intermediate filament head (DNA binding) region; pfam04732][propagated from UniProtKB/Swiss-Prot (P08670.4)][propagated from UniProtKB/Swiss-Prot (P08670.4)][Intermediate filament protein; pfam00038][propagated from UniProtKB/Swiss-Prot (P08670.4)][propagated from UniProtKB/Swiss-Prot (P08670.4)][propagated from UniProtKB/Swiss-Prot (P08670.4)][pr…	[2][5][7][7][7][8][9][9][10][10][20][25][25][25][26][26][27][27][29][30][33][33][34][34][38][39][39][39][39][42][42][47][47][51][51][53][53][55][56][56][56][61][61][61][66][72][72][73][73][83][83][85][85][117][117][117][120][139][144][214][214][226][259][259][259][261][266][299][351][373][400][409][412][412][419][419][420][426][426][430][430][436][445][446][458][458][459][459]	[acetylation][phosphorylation][phosphorylation][phosphorylation][phosphorylation][phosphorylation][phosphorylation][phosphorylation][phosphorylation][phosphorylation][phosphorylation][phosphorylation][phosphorylation][phosphorylation][phosphorylation][phosphorylation][phosphorylation][phosphorylation][phosphorylation][phosphorylation][phosphorylation][phosphorylation][phosphorylation][phosphoryla…	[N-acetylserine; propagated from UniProtKB/Swiss-Prot (P08670.4)][Phosphoserine; propagated from UniProtKB/Swiss-Prot (P08670.4)][][][Phosphoserine, by PKA and PKC, alternate; propagated from UniProtKB/Swiss-Prot (P08670.4)][Phosphoserine; propagated from UniProtKB/Swiss-Prot (P08670.4)][][Phosphoserine, by PKC; propagated from UniProtKB/Swiss-Prot (P08670.4)][][Phosphoserine, by PKC; propagated …				1	NP_003371.2	730	NP_003371.2	vimentin [Homo sapiens]	0	0	0	0	0	0.00047028	0	0	0	0.00094488	0	0	0	0.00267719	0	0	0	0	0	0.00026644	0	0	0	0	0	0
383						HMOX2		16	1.14.99.3	[86..292]	[HemeO]	[Heme oxygenase catalyzes the rate limiting step in the degradation of heme to bilirubin, it is essential for recycling of iron from heme. Heme is used as a substrate and cofactor for its own degradation to biliverdin, iron, and carbon monoxide. This...; cd00232]	[order(92,95,99,208,217,221,253,281)][99]	[other][other]	[heme binding pocket [chemical binding]][heme ligand [chemical binding]]				3	NP_001273196.1;NP_001273200.1;NP_002125.3	732	NP_001273196.1	0 genes:. 3 proteins in this group did not match any genes. NP_001273196.1:heme oxygenase 2 isoform a [Homo sapiens] ;NP_001273200.1:heme oxygenase 2 isoform c [Homo sapiens] ;NP_002125.3:heme oxygenase 2 isoform b [Homo sapiens] ;	0	0	0	0	0	0	0	0.00043584	0	0.00059502	0	0	0	0	0	0	0	0	0	0	0	0	0	0	0	0
384	o	45	0.017	Q	0	MACF1		1		[79..181][148..171][195..298][240..264][377..399][441..464][586..680][682..871][1050..1073][1128..1154][1164..1343][1187..1210][1257..1282][1429..1660][1816..2044][2046..2253][2261..2508][2401..2620][2626..2840][2842..3046][3061..3276][3281..3494][3497..3712][3716..3928][3826..4045][4047..4264][4267..4483][4488..4702][4707..4919][4929..5053][5087..5149][5093..5148][5162..5234][5247..>5428]	[CH][LRR 1][CH][LRR 2][LRR 3][LRR 4][SPEC][SPEC][LRR 5][LRR 6][SPEC][LRR 7][LRR 8][SPEC][SPEC][SPEC][SPEC][SPEC][SPEC][SPEC][SPEC][SPEC][SPEC][SPEC][SPEC][SPEC][SPEC][SPEC][SPEC][SPEC][EFh][EF-hand_7][GAS2][APC_basic]	[Calponin homology domain; actin-binding domain which may be present as a single copy or in tandem repeats (which increases binding affinity). The CH domain is found in cytoskeletal and signal transduction proteins, including actin-binding proteins like...; cd00014][propagated from UniProtKB/Swiss-Prot (Q9UPN3.4)][Calponin homology domain; actin-binding domain which may be present as a single cop…	[4][35][57][order(79..80,82..84,87,90,143..144,147,150,152,167..168,][order(195..196,198..200,203,206,259..260,263,266,268,][280][785..790][814][1273..1278][1376][1544..1549][1860][1862][order(1930..1931,1933..1936)][2152..2157][2396..2401][2429][2454][2508..2513][order(2729..2732,2734..2735)][2946..2951][3164..3169][3384..3389][3602..3607][3820..3825][3928..3933][4153..4158][4372..4377][4452][45…	[phosphorylation][phosphorylation][phosphorylation][other][other][phosphorylation][other][phosphorylation][other][phosphorylation][other][phosphorylation][phosphorylation][other][other][other][phosphorylation][phosphorylation][other][other][other][other][other][other][other][other][other][other][phosphorylation][other][other][other]	[Phosphoserine. {ECO:0000250|UniProtKB:D3ZHV2}; propagated from UniProtKB/Swiss-Prot (Q9UPN3.4)][Phosphoserine. {ECO:0000250|UniProtKB:Q9QXZ0}; propagated from UniProtKB/Swiss-Prot (Q9UPN3.4)][Phosphoserine. {ECO:0000250|UniProtKB:Q9QXZ0}; propagated from UniProtKB/Swiss-Prot (Q9UPN3.4)][putative actin binding surface [polypeptide binding]][putative actin binding surface [polypeptide binding]][Ph…				1	NP_036222.3	738	NP_036222.3	microtubule-actin cross-linking factor 1 [Homo sapiens]	0	0.0216726	0	0	0	0	0	0	0	0	0	0	0	0	0	0	0	0	0	0	0	0	0	0	0	0
385						AHCYL2		7	3.3.1.1	[2..109][184..604][194..598]	[LISN domain, inhibits interaction with ITPR1. {ECO:0000269|PubMed:19220705}][PRK05476][SAHH]	[propagated from UniProtKB/Swiss-Prot (Q96HN2.1)][S-adenosyl-L-homocysteine hydrolase; Provisional][S-Adenosylhomocysteine Hydrolase, NAD-binding and catalytic domains; cd00401]	[2][107][121][148][151][154][157][164][order(195,198,202,205..206,340,343..344,360,362,366..367,][order(233,235,237..238,309,334..335,364,368,525,530,535,][order(233,309,334,368)][order(335..337,369,373,398,400..402,420..423,426,453..456,][471]	[acetylation][phosphorylation][acetylation][phosphorylation][phosphorylation][phosphorylation][phosphorylation][phosphorylation][other][other][active][other][phosphorylation]	[N-acetylserine. {ECO:0000244|PubMed:19413330, ECO:0000244|PubMed:22223895}; propagated from UniProtKB/Swiss-Prot (Q96HN2.1)][Phosphoserine. {ECO:0000244|PubMed:18669648, ECO:0000244|PubMed:20068231}; propagated from UniProtKB/Swiss-Prot (Q96HN2.1)][N6-acetyllysine. {ECO:0000250|UniProtKB:Q80SW1}; propagated from UniProtKB/Swiss-Prot (Q96HN2.1)][Phosphoserine. {ECO:0000305|PubMed:19220705}; propa…				4	NP_001124192.1;NP_001124194.2;NP_001124195.1;NP_056143.1	744	NP_001124192.1	0 genes:. 4 proteins in this group did not match any genes. NP_001124192.1:adenosylhomocysteinase 3 isoform b [Homo sapiens] ;NP_001124194.2:adenosylhomocysteinase 3 isoform c [Homo sapiens] ;NP_001124195.1:adenosylhomocysteinase 3 isoform d [Homo sapiens] ;NP_056143.1:adenosylhomocysteinase 3 isoform a [Homo sapiens] ;	0	0	0	0	0	0	0	0	0	0	0	0	0	0	0	0	0	0	0.00193674	0.00020354	0	0	0	0	0	0
386	o	25	0.435	S	32	EPHX2		8	3.3.2.10;3.1.3.76	[1..224][2..219][<103..203][123..124][235..555][<260..>299][286..540][553..555]	[Phosphatase][HAD-1A3-hyp][HAD_like][Phosphate binding][Epoxide hydrolase][Esterase_lipase][Abhydrolase_1][Microbody targeting signal. {ECO:0000255}]	[propagated from UniProtKB/Swiss-Prot (P34913.2)][epoxide hydrolase N-terminal domain-like phosphatase; TIGR02247][Haloacid dehalogenase-like hydrolases. The haloacid dehalogenase-like (HAD) superfamily includes L-2-haloacid dehalogenase, epoxide hydrolase, phosphoserine phosphatase, phosphomannomutase, phosphoglycolate phosphatase, P-type ATPase, and many others; cd01427][propagated from UniProt…	[43][55][123][191][215][370][421][455][554]	[acetylation][modified][other][acetylation][acetylation][phosphorylation][modified][modified][modified]	[N6-acetyllysine. {ECO:0000244|PubMed:19608861}; propagated from UniProtKB/Swiss-Prot (P34913.2)][N6-succinyllysine. {ECO:0000250|UniProtKB:P34914}; propagated from UniProtKB/Swiss-Prot (P34913.2)][motif II][N6-acetyllysine. {ECO:0000250|UniProtKB:P34914}; propagated from UniProtKB/Swiss-Prot (P34913.2)][N6-acetyllysine. {ECO:0000250|UniProtKB:P34914}; propagated from UniProtKB/Swiss-Prot (P34913…				1	NP_001970.2	745	NP_001970.2	bifunctional epoxide hydrolase 2 isoform a [Homo sapiens]	0	0	0	0	0	0	0	0	0	0	0	0	0	0	0	0	0	0	0	0.00044743	0	0	0	0	0	0
387	o	29	0.014	Q	0	HTATSF1		X		[132..222][134..213][263..353][266..342][381..755]	[RRM1_TatSF1_like][RRM][RRM2_TatSF1_like][RRM_6][Mediates interaction with the P-TEFb complex]	[RNA recognition motif 1 in HIV Tat-specific factor 1 (Tat-SF1) and similar proteins; cd12281][RNA recognition motif; smart00360][RNA recognition motif 2 in HIV Tat-specific factor 1 (Tat-SF1) and similar proteins; cd12282][RNA recognition motif (a.k.a. RRM, RBD, or RNP domain); pfam14259][propagated from UniProtKB/Swiss-Prot (O43719.1)]	[2][387][387][403][407][409][445][452][453][481][485][494][498][498][557][557][561][561][579][579][597][597][600][600][607][607][616][616][624][624][633][633][634][642][642][676][676][702][702][702][713][713][714][714][721][721]	[acetylation][phosphorylation][phosphorylation][phosphorylation][phosphorylation][phosphorylation][phosphorylation][phosphorylation][phosphorylation][phosphorylation][phosphorylation][phosphorylation][phosphorylation][phosphorylation][phosphorylation][phosphorylation][phosphorylation][phosphorylation][phosphorylation][phosphorylation][phosphorylation][phosphorylation][phosphorylation][phosphoryla…	[N-acetylserine; propagated from UniProtKB/Swiss-Prot (O43719.1)][][Phosphoserine; propagated from UniProtKB/Swiss-Prot (O43719.1)][Phosphoserine; propagated from UniProtKB/Swiss-Prot (O43719.1)][Phosphoserine; propagated from UniProtKB/Swiss-Prot (O43719.1)][][Phosphoserine; propagated from UniProtKB/Swiss-Prot (O43719.1)][Phosphoserine; propagated from UniProtKB/Swiss-Prot (O43719.1)][Phosphose…				1	NP_055315.2	748	NP_055315.2	HIV Tat-specific factor 1 [Homo sapiens]	0	0	0	0	0	0	0	0	0	0	0	0	0	0	0	0	0	0	0	0.00024668	0.00128058	7.574e-05	0	0	0	0
388						AGO2		8	3.1.26.n2	[25..824][175..227][227..347][392..783]	[PLN03202][DUF1785][PAZ_argonaute_like][Piwi_ago-like]	[protein argonaute; Provisional][Domain of unknown function (DUF1785); pfam08699][PAZ domain, argonaute_like subfamily. Argonaute is part of the RNA-induced silencing complex (RISC), and is an endonuclease that plays a key role in the RNA interference pathway. The PAZ domain has been named after the proteins Piwi,Argonaut, and Zwille; cd02846][Piwi_ago-like: PIWI domain, Argonaute-like subfamily.…	[order(279,294,308,312,330,337,339)][order(529,533,545..548,551,559,562,566,570)][order(597,599,669,773)]	[other][other][active]	[nucleic acid-binding interface [nucleotide binding]][5' RNA guide strand anchoring site][]				5	NP_001158095.1;NP_001304051.1;NP_001304052.1;NP_036286.2;NP_036331.1	749	NP_001158095.1	0 genes:. 5 proteins in this group did not match any genes. NP_001158095.1:protein argonaute-2 isoform 2 [Homo sapiens] ;NP_001304051.1:protein argonaute-1 isoform 1x [Homo sapiens] ;NP_001304052.1:protein argonaute-1 isoform 2 [Homo sapiens] ;NP_036286.2:protein argonaute-2 isoform 1 [Homo sapiens] ;NP_036331.1:protein argonaute-1 isoform 1 [Homo sapiens] ;	0	0	0	0	0	0	0	0	0	0	0	0	0	0	0	0	0	0	0	7.525e-05	0	0	0	0	0	0
389	o	6	0.177	Q	22	LUC7L2		7		[4..239][5..228]	[LUC7][LUC7]	[LUC7 N_terminus; pfam03194][U1 snRNP component, mediates U1 snRNP association with cap-binding complex [RNA processing and modification]; COG5200]	[17][18][111][266][269][347][353][354][384]	[phosphorylation][phosphorylation][phosphorylation][hydroxylation][hydroxylation][phosphorylation][phosphorylation][phosphorylation][phosphorylation]	[][Phosphoserine. {ECO:0000250|UniProtKB:Q7TNC4}; propagated from UniProtKB/Swiss-Prot (Q9Y383.2)][][5-hydroxylysine, by JMJD6. {ECO:0000269|PubMed:19574390}; propagated from UniProtKB/Swiss-Prot (Q9Y383.2)][5-hydroxylysine, by JMJD6. {ECO:0000269|PubMed:19574390}; propagated from UniProtKB/Swiss-Prot (Q9Y383.2)][][][][]				1	NP_057103.2	752	NP_057103.2	putative RNA-binding protein Luc7-like 2 isoform 1 [Homo sapiens]	0	0	0	0	0	0	0	0	0	0	0	0	0	0	0	0	0	0	0	0.00142532	0.00493286	0.00116699	0.00023552	0	0	0
390						GANAB		11	3.2.1.84	[152..292][273..718][292..759]	[GH31_N][Glyco_hydro_31][GH31_GANC_GANAB_alpha]	[N-terminal domain of glycosyl hydrolase family 31 (GH31); cd14752][Glycosyl hydrolases family 31; pfam01055][neutral alpha-glucosidase C, neutral alpha-glucosidase AB; cd06603]	[191][order(337,450,510,523,526,559,584)][order(450,526)]	[active][active][active]	[][putative active site [active]][catalytic site [active]]				5	NP_001265121.1;NP_001265122.1;NP_001265123.1;NP_938148.1;NP_938149.2	753	NP_001265121.1	0 genes:. 5 proteins in this group did not match any genes. NP_001265121.1:neutral alpha-glucosidase AB isoform 4 [Homo sapiens] ;NP_001265122.1:neutral alpha-glucosidase AB isoform 5 [Homo sapiens] ;NP_001265123.1:neutral alpha-glucosidase AB isoform 6 [Homo sapiens] ;NP_938148.1:neutral alpha-glucosidase AB isoform 2 precursor [Homo sapiens] ;NP_938149.2:neutral alpha-glucosidase AB isoform 3 p…	0	0	0	0	0	0	0	0	0	0	0	0	0	0	0	0.00049259	0	0	0	0	0	0	3.612e-05	0	0	0
391						MRPL14		6		[42..156]	[Ribosomal_L14]	[Ribosomal protein L14p/L23e; pfam00238]							4	NP_001305698.1;NP_001305699.1;NP_001305700.1;NP_115487.2	758	NP_001305698.1	0 genes:. 4 proteins in this group did not match any genes. NP_001305698.1:39S ribosomal protein L14, mitochondrial isoform b [Homo sapiens] ;NP_001305699.1:39S ribosomal protein L14, mitochondrial isoform c [Homo sapiens] ;NP_001305700.1:39S ribosomal protein L14, mitochondrial isoform d [Homo sapiens] ;NP_115487.2:39S ribosomal protein L14, mitochondrial isoform a precursor [Homo sapiens] ;	0	0	0	0	0	0	0	0	0	0	0	0	0	0	0	0	0	0	0	0.00079591	0	0	0	0	0	0
392						AFG3L2		18		[146..242][253..746][341..477][562..744]	[FtsH_ext][FtsH_fam][AAA][Peptidase_M41]	[FtsH Extracellular; pfam06480][ATP-dependent metalloprotease FtsH; TIGR01241][The AAA+ (ATPases Associated with a wide variety of cellular Activities) superfamily represents an ancient group of ATPases belonging to the ASCE (for additional strand, catalytic E) division of the P-loop NTPase fold. The ASCE division also includes ABC; cd00009][Peptidase family M41; pfam01434]	[117][143..163][251..271][348..355][order(349..356,407,454)][403..408][468]	[modified][transmembrane region][transmembrane region][other][other][other][other]	[N6-succinyllysine. {ECO:0000250|UniProtKB:Q8JZQ2}; propagated from UniProtKB/Swiss-Prot (Q9Y4W6.2)][propagated from UniProtKB/Swiss-Prot (Q9Y4W6.2)][propagated from UniProtKB/Swiss-Prot (Q9Y4W6.2)][Walker A motif][ATP binding site [chemical binding]][Walker B motif][arginine finger]				1	NP_006787.2	762	NP_006787.2	AFG3-like protein 2 [Homo sapiens]	0	0	0	0	0	0	0	0	0	0	0	0.00026375	0	0	0	0	0	0	0	0	0	0	0	0	0	0
393	o	13	0.224	Q	28	ATP6V1B2		8	3.6.3.14	[46..509][50..116][118..401][417..510]	[V-ATPase_V1_B][ATP-synt_ab_N][V_A-ATPase_B][ATP-synt_ab_C]	[V-type (H+)-ATPase V1, B subunit; TIGR01040][ATP synthase alpha/beta family, beta-barrel domain; pfam02874][V/A-type ATP synthase (non-catalytic) subunit B. These ATPases couple ATP hydrolysis to the build up of a H+ gradient, but V-type ATPases do not catalyze the reverse reaction. The Vacuolar (V-type) ATPase is found in the membranes of vacuoles, the golgi...; cd01135][ATP synthase alpha/beta…	[193..200][296..299]	[other][other]	[Walker A motif homologous position][Walker B motif]				1	NP_001684.2	769	NP_001684.2	V-type proton ATPase subunit B, brain isoform [Homo sapiens]	0	0	0	0	0	0	0	0	0	0	0	0.00699327	0	0	0	0	0	0	0	0	0	0	0	0	0	0
394	o	3	0.086	Q	0	ARPC5		1		[9..154]	[P16-Arc]	[ARP2/3 complex 16 kDa subunit (p16-Arc); pfam04699]							2	NP_001257368.1;NP_005708.1	770	NP_001257368.1	0 genes:. 2 proteins in this group did not match any genes. NP_001257368.1:actin-related protein 2/3 complex subunit 5 isoform 2 [Homo sapiens] ;NP_005708.1:actin-related protein 2/3 complex subunit 5 isoform 1 [Homo sapiens] ;	0	0	0	0	0	0	0	0	0	0	0	0	0	0	0	0	0	0	0	0.00080624	0	0	0	0	0	0
395	i5-27o323-345i	19	0.719	S	22	BSG		19		[37..112][40..114][219..317][228..318]	[IGc2][Ig][Ig][IG_like]	[Immunoglobulin C-2 Type; smart00408][Immunoglobulin domain; cd00096][Immunoglobulin domain; cl11960][Immunoglobulin like; smart00410]	[324..344][362][362][368][368]	[transmembrane region][phosphorylation][phosphorylation][phosphorylation][phosphorylation]	[propagated from UniProtKB/Swiss-Prot (P35613.2)][][Phosphoserine. {ECO:0000244|PubMed:17081983, ECO:0000244|PubMed:20068231, ECO:0000244|PubMed:21406692, ECO:0000244|PubMed:24275569}; propagated from UniProtKB/Swiss-Prot (P35613.2)][][Phosphoserine. {ECO:0000244|PubMed:24275569}; propagated from UniProtKB/Swiss-Prot (P35613.2)]				2	NP_001719.2;NP_940991.1	771	NP_001719.2	0 genes:. 2 proteins in this group did not match any genes. NP_001719.2:basigin isoform 1 precursor [Homo sapiens] ;NP_940991.1:basigin isoform 2 [Homo sapiens] ;	0	0	0	0	0	0.00113844	0	0.00125657	0	0.00114367	0	0	0	0	0	0	0	0	0	0	0	0	0	0	0	0
396	o	24	0.809	S	24	ERO1A		14		[59..458]	[ERO1]	[Endoplasmic Reticulum Oxidoreductin 1 (ERO1); pfam04137]	[106][143]	[phosphorylation][phosphorylation]	[Phosphoserine. {ECO:0000269|PubMed:24275569}; propagated from UniProtKB/Swiss-Prot (Q96HE7.2)][Phosphoserine. {ECO:0000269|PubMed:20068231}; propagated from UniProtKB/Swiss-Prot (Q96HE7.2)]				1	NP_055399.1	772	NP_055399.1	ERO1-like protein alpha precursor [Homo sapiens]	0	0	0	0	0	0	0	0	0	0	0	0	0	0	0	0	0	0	0	0	0.00051647	0	0	0	0	0
397						SMARCA1		X		[<71..110][87..1069][203..342][311..314][477..620][758..838][859..898][913..1027]	[DBINO][PLN03142][DEXDc][DEAH box][HELICc][HAND][SANT][SLIDE]	[DNA-binding domain; pfam13892][Probable chromatin-remodeling complex ATPase chain; Provisional][DEAD-like helicases superfamily. A diverse family of proteins involved in ATP-dependent RNA or DNA unwinding. This domain contains the ATP-binding region; cd00046][propagated from UniProtKB/Swiss-Prot (P28370.2)][Helicase superfamily c-terminal domain; associated with DEXDc-, DEAD-, and DEAH-box prote…	[116][119][211..215][311..314][order(510..513,533..534,574..576)][order(582,603,607,610)][order(860,890..891,893..894,896..898)][954]	[phosphorylation][phosphorylation][other][other][other][other][DNA binding][phosphorylation]	[Phosphoserine. {ECO:0000244|PubMed:21406692}; propagated from UniProtKB/Swiss-Prot (P28370.2)][Phosphoserine. {ECO:0000244|PubMed:21406692}; propagated from UniProtKB/Swiss-Prot (P28370.2)][ATP binding site [chemical binding]][putative Mg++ binding site [ion binding]][nucleotide binding region [chemical binding]][ATP-binding site [chemical binding]][DNA binding site [nucleotide binding]][Phospho…				1	NP_001269803.1	773	NP_001269803.1	probable global transcription activator SNF2L1 isoform d [Homo sapiens]	0.00017579	0	0	0	0	0	0	0	0	0	0	0	0	0	0	0	0	0	0	0	0	0	0	0	0	0
398	o	17	0.063	Q	63	GPX4		19	1.11.1.12	[77..230]	[GSH_Peroxidase]	[Glutathione (GSH) peroxidase family; tetrameric selenoenzymes that catalyze the reduction of a variety of hydroperoxides including lipid peroxidases, using GSH as a specific electron donor substrate. GSH peroxidase contains one selenocysteine residue per...; cd00340]	[order(110,145,200)][110][order(144,147,149,152,155,159)]	[active][other][other]	[catalytic residues [active]][Selenocysteine][dimer interface [polypeptide binding]]				2	NP_001034937.1;NP_002076.2	775	NP_001034937.1	0 genes:. 2 proteins in this group did not match any genes. NP_001034937.1:phospholipid hydroperoxide glutathione peroxidase, mitochondrial isoform C precursor [Homo sapiens] ;NP_002076.2:phospholipid hydroperoxide glutathione peroxidase, mitochondrial isoform A precursor [Homo sapiens] ;	0	0	0	0	0	0	0	0	0	0	0	0	0	0	0	0	0	0	0	0	0	0	0.00013152	0	0	0
399						SAP130		2	3.2.1.3	[<45..365][<285..492][<563..912]	[PHA03247][PHA02732][PHA03247]	[large tegument protein UL36; Provisional][hypothetical protein; Provisional][large tegument protein UL36; Provisional]							2	NP_001139400.1;NP_078821.2	783	NP_001139400.1	0 genes:. 2 proteins in this group did not match any genes. NP_001139400.1:histone deacetylase complex subunit SAP130 isoform a [Homo sapiens] ;NP_078821.2:histone deacetylase complex subunit SAP130 isoform b [Homo sapiens] ;	0	0	0	0	0	0	0	0	0	0.00040657	0	0	0	0	0	0	0	0	0	0	0	0	0	0	0	0
400	i2-24o	25	0.672	S	21	ACACB		12	6.4.1.2;6.3.4.14	[260..763][260..378][432..613][651..757][896..961][962..1688][1780..2328]	[AccC][CPSase_L_chain][ATP-grasp_4][Biotin_carb_C][biotinyl_domain][ACC_central][Carboxyl_trans]	[Biotin carboxylase [Lipid transport and metabolism]; COG0439][Carbamoyl-phosphate synthase L chain, N-terminal domain; pfam00289][ATP-grasp domain; cl17255][Biotin carboxylase C-terminal domain; smart00878][The biotinyl-domain or biotin carboxyl carrier protein (BCCP) domain is present in all biotin-dependent enzymes, such as acetyl-CoA carboxylase, pyruvate carboxylase, propionyl-CoA carboxylas…	[35][70][91][95][200][207][222][222][469][order(919,928..930,937)][929][929][1340][1342][1360]	[phosphorylation][phosphorylation][phosphorylation][phosphorylation][phosphorylation][phosphorylation][phosphorylation][phosphorylation][phosphorylation][other][other][modified][phosphorylation][phosphorylation][phosphorylation]	[Phosphoserine. {ECO:0000244|PubMed:24275569}; propagated from UniProtKB/Swiss-Prot (O00763.3)][Phosphothreonine. {ECO:0000244|PubMed:24275569}; propagated from UniProtKB/Swiss-Prot (O00763.3)][Phosphoserine. {ECO:0000244|PubMed:24275569}; propagated from UniProtKB/Swiss-Prot (O00763.3)][Phosphoserine. {ECO:0000244|PubMed:24275569}; propagated from UniProtKB/Swiss-Prot (O00763.3)][Phosphoserine. …				1	NP_001084.3	784	NP_001084.3	acetyl-CoA carboxylase 2 precursor [Homo sapiens]	0	0	0	0	0	0	0	0	0	0	0	0.00034208	0	0	0	0	0	0	0	0	0	0	0	0	0	0
401						ASAP1		8		[47..261][309..415][432..548][<594..682][596..650][1064..1120]	[BAR_ASAP1][PH_ASAP][ArfGap][ANK][Ank_4][SH3_ASAP1]	[The Bin/Amphiphysin/Rvs (BAR) domain of ArfGAP with SH3 domain, ANK repeat and PH domain containing protein 1; cd07641][ArfGAP with SH3 domain, ankyrin repeat and PH domain Pleckstrin homology (PH) domain; cd13251][Putative GTPase activating protein for Arf; pfam01412][ankyrin repeats; ankyrin repeats mediate protein-protein interactions in very diverse families of proteins. The number of ANK re…	[order(56,59..60,64,66..67,70..71,73..74,84..85,87..88,][order(1069,1071,1074,1078,1096..1097,1113,1115..1116)]	[other][other]	[dimer interface [polypeptide binding]][peptide ligand binding site [polypeptide binding]]				2	NP_001234925.1;NP_060952.2	786	NP_001234925.1	0 genes:. 2 proteins in this group did not match any genes. NP_001234925.1:arf-GAP with SH3 domain, ANK repeat and PH domain-containing protein 1 isoform 2 [Homo sapiens] ;NP_060952.2:arf-GAP with SH3 domain, ANK repeat and PH domain-containing protein 1 isoform 1 [Homo sapiens] ;	0	0	0.0357648	0	0	0	0	0	0	0	0	0	0	0	0	0	0	0	0	0	0	0	0	0	0	0
402	o	33	0.049	Q	33	ALDOC		17	4.1.2.13	[13..343]	[FBP_aldolase_I_a]	[Fructose-1,6-bisphosphate aldolase; cd00948]	[13][order(34..36,39,108,147,149,188,230,271..273,301,303..304)][36][39][45][order(111,162,165..166,169,173,176,204,208,211,218..219,][111][119][132][230][272][276][301][309][364]	[modified][active][phosphorylation][phosphorylation][phosphorylation][other][acetylation][phosphorylation][phosphorylation][active][phosphorylation][phosphorylation][phosphorylation][phosphorylation][other]	[N6-succinyllysine. {ECO:0000250|UniProtKB:Q91Y97}; propagated from UniProtKB/Swiss-Prot (P09972.2)][][Phosphoserine. {ECO:0000244|PubMed:24275569}; propagated from UniProtKB/Swiss-Prot (P09972.2)][Phosphoserine. {ECO:0000244|PubMed:24275569}; propagated from UniProtKB/Swiss-Prot (P09972.2)][Phosphoserine. {ECO:0000244|PubMed:24275569}; propagated from UniProtKB/Swiss-Prot (P09972.2)][intersubuni…				1	NP_005156.1	787	NP_005156.1	fructose-bisphosphate aldolase C [Homo sapiens]	0	0	0	0	0.00368413	0	0	0	0.00266189	0	0	0	0	0	0	0	0	0	0	0	0	0	0	0	0	0
403	o	34	0.166	Q	34	RABL3		3		[1..236][6..182][7..210]	[Small GTPase-like][small_GTP][RabL3]	[propagated from UniProtKB/Swiss-Prot (Q5HYI8.1)][small GTP-binding protein domain; TIGR00231][Rab GTPase-like family 3 (Rab-like3); cd04102]	[13..20][order(15..21,37..38,69,147..148,150,182)][order(37..39,42..45)][38][order(39,42..43,63,65,89)][order(39,42,65..66)][order(42..47,61)][66..69][69][147..150][182..184]	[other][other][other][other][other][other][other][other][other][other][other]	[G1 box][GTP/Mg2+ binding site [chemical binding]][Switch I region][G2 box][putative effector interaction site][putative GDI interaction site [polypeptide binding]][putative GEF interaction site [polypeptide binding]][G3 box][Switch II region][G4 box][G5 box]				1	NP_776186.2	788	NP_776186.2	rab-like protein 3 [Homo sapiens]	0	0	0	0	0	0	0	0	0	0	0	0	0	0	0	0	0	0	0	0	0	0	0.0001304	0	0	0
404						CNN3		1		[16..182][28..>79][118..143][158..183][197..222]	[SCP1][CH][Calponin][Calponin][Calponin]	[Calponin [Cytoskeleton]; COG5199][Calponin homology domain; actin-binding domain which may be present as a single copy or in tandem repeats (which increases binding affinity). The CH domain is found in cytoskeletal and signal transduction proteins, including actin-binding proteins like...; cd00014][Calponin family repeat; pfam00402][Calponin family repeat; pfam00402][Calponin family repeat; pfam…							3	NP_001272984.1;NP_001272985.1;NP_001830.1	789	NP_001272984.1	0 genes:. 3 proteins in this group did not match any genes. NP_001272984.1:calponin-3 isoform 2 [Homo sapiens] ;NP_001272985.1:calponin-3 isoform 3 [Homo sapiens] ;NP_001830.1:calponin-3 isoform 1 [Homo sapiens] ;	0	0	0	0	0	0	0	0	0	0	0	0	0	0	0	0	0	0	0	0.00043873	0	0.00020206	0	0	0	0
405	o	38	0.074	Q	0	POLD3		11		[19..466][259..>330]	[CDC27][eIF3_subunit]	[DNA polymerase subunit Cdc27; pfam09507][Translation initiation factor eIF3 subunit; pfam08597]	[2][307][307][311][407][407][409][409][411][411][413][413][458]	[acetylation][phosphorylation][phosphorylation][phosphorylation][phosphorylation][phosphorylation][phosphorylation][phosphorylation][phosphorylation][phosphorylation][phosphorylation][phosphorylation][phosphorylation]	[N-acetylalanine. {ECO:0000244|PubMed:22223895, ECO:0000269|Ref.6}; propagated from UniProtKB/Swiss-Prot (Q15054.2)][][Phosphoserine. {ECO:0000244|PubMed:17081983, ECO:0000244|PubMed:18669648, ECO:0000244|PubMed:18691976, ECO:0000244|PubMed:19369195, ECO:0000244|PubMed:20068231, ECO:0000244|PubMed:21406692}; propagated from UniProtKB/Swiss-Prot (Q15054.2)][][][Phosphoserine. {ECO:0000244|PubMed:1…				1	NP_006582.1	792	NP_006582.1	DNA polymerase delta subunit 3 [Homo sapiens]	0	0	0	0	0	0	0	0	0	0	0	0	0	0	0	0	0	0	0	0.00013322	0	0	6.604e-05	0	0	0
406	o	38	0.14	Q	24	RAB1A		2		[10..175][13..174][40..48]	[Rab1_Ypt1][Ras][Effector region (By similarity)]	[Rab GTPase family 1 includes the yeast homolog Ypt1; cd01869][Ras family; pfam00071][propagated from UniProtKB/Swiss-Prot (P62820.3)]	[2][10..13][18..25][order(19,21..26,36,124..125,127,154..156)][order(26..37,40..42)][order(36,41..49)][order(41,45..52,59,61)][43][order(44,46..48,63,65,72..73,76,80,82..85,172)][order(44..45,47,65..66,73,75,77..79,82)][44..48][61..65][66..69][order(69,71..81)][72..77][79][80..84][89..94][115..121][124..127][154..156][170..175][204][205]	[acetylation][other][other][other][other][other][other][other][other][other][other][other][other][other][other][phosphorylation][other][other][other][other][other][other][modified][modified]	[N-acetylserine; propagated from UniProtKB/Swiss-Prot (P62820.3)][Rab subfamily motif 1 (RabSF1)][G1 box][GTP/Mg2+ binding site [chemical binding]][Rab subfamily motif 2 (RabSF2)][Switch I region][putative GEF interaction site [polypeptide binding]][G2 box][putative effector interaction site][GDI interaction site][Rab family motif 1 (RabF1)][Rab family motif 2 (RabF2)][G3 box][Switch II region][R…				1	NP_004152.1	793	NP_004152.1	ras-related protein Rab-1A isoform 1 [Homo sapiens]	0	0	0	0	0	0	0	0.00157326	0	0	0	0	0	0	0	0	0	0	0	0	0	0	0.00045036	0	0	0
407						GPATCH11		2		[96..139][237..284]	[G-patch][DUF4187]	[G-patch domain; pfam01585][Domain of unknown function (DUF4187); pfam13821]							1	NP_777591.3	794	NP_777591.3	G patch domain-containing protein 11 isoform 1 [Homo sapiens]	0	0	0	0	0	0	0	0	0	0	0	0	0	0	0	0	0	0	0	0.00065348	0	0	0	0	0	0
408	o	34	0.688	S	34	KLK10		19	3.4.21.35	[49..272][49..269]	[Tryp_SPc][Tryp_SPc]	[Trypsin-like serine protease; Many of these are synthesized as inactive precursor zymogens that are cleaved during limited proteolysis to generate their active forms. Alignment contains also inactive enzymes that have substitutions of the catalytic triad...; cd00190][Trypsin-like serine protease; smart00020]	[order(86,137,229)][order(223,244,246)]	[active][other]	[][substrate binding sites [chemical binding]]				1	NP_665895.1	795	NP_665895.1	kallikrein-10 preproprotein [Homo sapiens]	0	0	0	0	0	0	0	0	0	0	0	0	0	0	0	0	0	0	0	0.00044986	0	0	0	0	0	0
409	o	21	0.83	S	21	B2M		15		[24..116]	[IgC_beta2m]	[Class I major histocompatibility complex (MHC) beta2-microglobulin; cd05770]	[order(28,30..32,44,46,48,73..76,80,82..83)][order(28,32..34,41,46,53..54,73..77,79..80,83)]	[other][other]	[MHC_I_alpha_interface][oligomer interface [polypeptide binding]]				1	NP_004039.1	796	NP_004039.1	beta-2-microglobulin precursor [Homo sapiens]	0	0	0	0	0	0.0018416	0	0	0	0	0	0	0	0	0	0	0	0	0	0.00052169	0	0	0	0	0.0136877	0
410						TFE3		X		[239..299][327..470]	[HLH][DUF3371]	[Helix-loop-helix domain, found in specific DNA- binding proteins that act as transcription factors; 60-100 amino acids long. A DNA-binding basic region is followed by two alpha-helices separated by a variable loop region; HLH forms homo- and heterodimers; cd00083][Domain of unknown function (DUF3371); pfam11851]	[order(242..243,249..251,253,277,280)][250][order(256..257,260..261,263..264,281,284,288,290..291,295,]	[DNA binding][other][other]	[DNA binding region [nucleotide binding]][E-box/N-box specificity site][dimerization interface [polypeptide binding]]				1	NP_001269071.1	799	NP_001269071.1	transcription factor E3 isoform 2 [Homo sapiens]	0	0	0	0	0	0	0	0	0	0.00046842	0	0	0	0	0	0	0.0197485	0	0	0	0	0	0	0.00088836	0.0011552	0
411	o	37	0.011	Q	0	DDX39A		19	3.6.4.13	[33..417][44..72][46..249][195..198][263..389]	[PTZ00424][Q motif][DEADc][DECD box][HELICc]	[helicase 45; Provisional][propagated from UniProtKB/Swiss-Prot (O00148.2)][DEAD-box helicases. A diverse family of proteins involved in ATP-dependent RNA unwinding, needed in a variety of cellular processes including splicing, ribosome biogenesis and RNA degradation. The name derives from the sequence of the Walker B motif...; cd00268][propagated from UniProtKB/Swiss-Prot (O00148.2)][Helicase su…	[2][35][91..95][171][195..198][227..229][order(294..297,317..318,343..345)][order(351,372,376,379)][426]	[acetylation][acetylation][other][phosphorylation][other][other][other][other][phosphorylation]	[N-acetylalanine. {ECO:0000244|PubMed:19413330, ECO:0000244|PubMed:20068231, ECO:0000244|PubMed:22223895}; propagated from UniProtKB/Swiss-Prot (O00148.2)][N6-acetyllysine, alternate. {ECO:0000244|PubMed:19608861}; propagated from UniProtKB/Swiss-Prot (O00148.2)][ATP binding site [chemical binding]][Phosphothreonine. {ECO:0000244|PubMed:20068231}; propagated from UniProtKB/Swiss-Prot (O00148.2)][…				1	NP_005795.2	801	NP_005795.2	ATP-dependent RNA helicase DDX39A [Homo sapiens]	0	0	0	0	0.00549599	0	0	0	0.0039332	0	0.0103093	0.00344606	0	0.00146086	0	0.00196576	0	0	0	0	0.00113213	0.00013392	0	0	0	0
[truncated: 1,105 more rows]
[truncated: 33 more columns]

## Sheet: B
Supplemental Table 3. Topological score (i.e. TopS) was applied to the eluted proteins across 26 fractions.
ROW_NAMES	Fr_6	Fr_7	Fr_8	Fr_9	Fr_10	Fr_11	Fr_12	Fr_13	Fr_14	Fr_15	Fr_16	fr_17	Fr_18	Fr_19	Fr_20	Fr_21	Fr_22	Fr_23	Fr_24	Fr_25	Fr_26	Fr_27	Fr_28	Fr_29	Fr_30	Fr_31	Count
TUBB	0	0	0	0	35.6035	18.6599	0	83.4631	33.5887	47.7055	12.4815	18.9638	0	32.3194	0.688578	10.5795	0	0	-1.39705	-27.3383	-4.41162	-11.087	-15.8896	0	-1.57306	0	9
ATP5A1	-3.09036	0	0	0	20.0454	16.2556	0	48.6564	43.3019	45.7863	27.1692	61.5951	0	8.23455	10.4257	3.41071	0	0	0	-23.4488	-4.18762	-8.56522	-8.5651	0	0	0	9
RUVBL2	0	0	0	0	3.70812	2.7427	0	14.2255	23.3238	19.7674	10.1782	6.66854	0	28.1132	7.74057	10.6594	0	0	0	-13.7535	2.35325	-5.47797	0	0	0	0	8
TUBB4B	0	0	0	0	10.0632	9.40603	0	9.05492	15.0876	22.5207	-0.218175	4.28847	0	12.4928	0.901047	9.95491	0	0	0	-8.6963	-2.27724	-1.63278	0	0	0	0	7
ALDOA	0.371701	0	0	0	7.73919	42.3232	0	49.7383	18.5068	27.2289	14.2311	-3.22271	0	-1.8513	1.44281	1.03969	0	0	-1.3535	-23.8633	-4.81783	-11.0572	-15.9418	-1.18296	2.47861	1.19525	6
HSPA8	0	0	0	0	5.05515	-3.14405	0	-11.4458	5.00642	2.55005	0.878248	4.74408	0	0.854653	5.43478	24.5383	0	2.36911	47.4879	125.258	3.46252	-19.8507	-9.97011	0	-1.59979	-0.508139	6
[truncated: 1,456 more rows]

## Sheet: C
Supplemental Table 3. Topological score (i.e. TopS) was applied to the eluted proteins across 26 fractions. 47 protein elution profiles across 26 fractions are included in here.
[truncated: 48 more rows]

[truncated: 3 more sheets: D, E, F]
